# Supplementary material for: Systematic exploration of synergistic drug pairs
Source: PubMed Central journal article supplement — Mol Syst Biol. 2011 Nov 8;7:544. doi: 10.1038/msb.2011.71 (PMC3261710; doi:10.1038/msb.2011.71), 2011-11-08

**Supplementary Table 1.** Drug target relationships in *S. cerevisiae* extracted by literature curation.

**Supplementary Table 2.** Drug synergy predictions made using synergistic genetic interactions between genes encoding drug targets.

**Supplementary Figure 1.** For each pairwise drug interaction experiment, drug pairs were combined in 8 x 8 matrices where the concentration of one drug was linearly increased along each axis. On the left, growth rates for each 8 x 8 matrix is shown (white corresponds to high growth and black corresponds to no growth, color bar is identical to Figure 2). Also shown are sample isophenotypic curves (white solid lines), largest isophenotypic curve used for drug interaction scoring (yellow dots), and drug interaction scores. On the right, raw data plots are shown, where the x axis of each cell corresponds to time (0 to 24 hours), and the y axis corresponds to OD<sub>595</sub> measurements (0 to 1). For drug name abbreviations, see Table 1.

**Supplementary Data 1.** Raw cell growth measurements for all 200 drug-drug interaction assays. Each file contains a 96x64 matrix of numbers which corresponds to OD<sub>595</sub> readings for one drug-drug interaction. Rows correspond to different time points with 15 minutes intervals that span 24 hours. Columns correspond to the 8 x 8 matrix of drug concentration combinations.

Supplementary Table 1.

| Compound Name          | Target Gene Symbol | Target Gene Systematic Name | Reference               | PMID     |
|------------------------|--------------------|-----------------------------|-------------------------|----------|
| 3-amino-triazole       | <i>HIS3</i>        | <i>YOR202W</i>              | Baganz et al, 1997      | 9509575  |
| 5-fluorocytosine       | <i>CDC21</i>       | <i>YOR074C</i>              | Goodman et al, 2006     | book     |
| 5-fluorodeoxyuridine   | <i>CDC21</i>       | <i>YOR074C</i>              | Goodman et al, 2006     | book     |
| 5-fluoro-dUMP          | <i>CDC21</i>       | <i>YOR074C</i>              | Kunz et al 1980         | 6449701  |
| 5-fluorouracil         | <i>CDC21</i>       | <i>YOR074C</i>              | Goodman et al, 2006     | book     |
| Acifluorfen-methyl     | <i>HEM14</i>       | <i>YER014W</i>              | Camadro & Labbe, 1996   | 8621563  |
| Amiloride              | <i>NHX1</i>        | <i>YDR456W</i>              | Darley et al, 2000      | 10998367 |
| Amsacrine              | <i>TOP2</i>        | <i>YNL088W</i>              | Nitiss et al, 1992      | 1322791  |
| Ansamycin              | <i>HSC82</i>       | <i>YMR186W</i>              | Bohen, 1998             | 9584173  |
| Ansamycin              | <i>HSP82</i>       | <i>YPL240C</i>              | Bohen, 1998             | 9584173  |
| Asulam                 | <i>FOL1</i>        | <i>YNL256W</i>              | Patel et al, 2003       | 12820798 |
| Asulam                 | <i>FOL3</i>        | <i>YMR113W</i>              | Patel et al, 2003       | 12820798 |
| Atorvastatin           | <i>HMG1</i>        | <i>YML075C</i>              | Hillenmeyer et al, 2010 | 20226027 |
| Atorvastatin           | <i>HMG2</i>        | <i>YLR450W</i>              | Hillenmeyer et al, 2010 | 20226027 |
| Aureobasidin A         | <i>AUR1</i>        | <i>YKL004W</i>              | Heidler & Radding, 1995 | 8593016  |
| Benomyl                | <i>TUB1</i>        | <i>YML085C</i>              | Stearns et al, 1990     | 2407611  |
| Benomyl                | <i>TUB2</i>        | <i>YFL037W</i>              | Stearns et al, 1990     | 2407611  |
| Benomyl                | <i>TUB3</i>        | <i>YML124C</i>              | Hillenmeyer et al, 2010 | 20226027 |
| Bromopyruvate          | <i>PYK1</i>        | <i>YAL038W</i>              | Yun & Suelter, 1979     | 370116   |
| Buthionine Sulfoximine | <i>GSH2</i>        | <i>YOL049W</i>              | Preveral et al, 2006    | 16806635 |
| Caffeine               | <i>TOR1</i>        | <i>YJR066W</i>              | Kuranda et al, 2006     | 16925551 |
| Calyculin A            | <i>GLC7</i>        | <i>YER133W</i>              | Hoon et al, 2008        | 18622389 |
| Camptothecin           | <i>TOP1</i>        | <i>YOL006C</i>              | Pommier et al, 1998     | 9748515  |
| Carbendazim            | <i>TUB1</i>        | <i>YML085C</i>              | Geissler et al, 1998    | 9463374  |
| Carbendazim            | <i>TUB2</i>        | <i>YFL037W</i>              | Geissler et al, 1998    | 9463374  |
| Carbendazim            | <i>TUB3</i>        | <i>YML124C</i>              | Hillenmeyer et al, 2010 | 20226027 |
| Carmustine             | <i>GLR1</i>        | <i>YPL091W</i>              | Hillenmeyer et al, 2010 | 20226027 |
| Caspofungin            | <i>FKS1</i>        | <i>YLR342W</i>              | Lesage et al, 2004      | 15166135 |
| Cervastatin            | <i>HMG1</i>        | <i>YML075C</i>              | Smith et al, 2009       | 19622793 |
| Clotrimazole           | <i>ERG11</i>       | <i>YHR007C</i>              | Truan et al, 1994       | 8181746  |
| Clozapine              | <i>COX17</i>       | <i>YLL009C</i>              | Hillenmeyer et al, 2010 | 20226027 |
| Colchicine             | <i>TUB2</i>        | <i>YFL037W</i>              | Hillenmeyer et al, 2010 | 20226027 |
| Colchicine             | <i>TUB3</i>        | <i>YML124C</i>              | Hillenmeyer et al, 2010 | 20226027 |
| Compactin              | <i>HMG1</i>        | <i>YML075C</i>              | Rine et al, 1983        | 6316322  |
| Compactin              | <i>HMG2</i>        | <i>YLR450W</i>              | Rine et al, 1983        | 6316322  |
| Cycloheximide          | <i>RPL28</i>       | <i>YGL103W</i>              | Kaufer, et al 1983      | 6304624  |

|                         |               |                |                               |          |
|-------------------------|---------------|----------------|-------------------------------|----------|
| Cycloheximide           | <i>RPL41A</i> | <i>YDL184C</i> | Stocklein & Piepersberg, 1980 | 7016025  |
| Cycloheximide           | <i>RPL41B</i> | <i>YDL133C</i> | Stocklein & Piepersberg, 1980 | 7016025  |
| Cyclosporin A           | <i>CNB1</i>   | <i>YKL190W</i> | Parsons et al, 2004           | 14661025 |
| Doxorubicin             | <i>TOP2</i>   | <i>YNL088W</i> | Khozoie, et al 2009           | 9380029  |
| Dyclonine               | <i>ERG2</i>   | <i>YMR202W</i> | Huang et al, 1992             | 1427091  |
| Dyclonine               | <i>ERG24</i>  | <i>YNL280C</i> | Giaever et al, 2004           | 14718668 |
| Econazole               | <i>ERG11</i>  | <i>YHR007C</i> | Hillenmeyer et al, 2010       | 20226027 |
| Etopazole               | <i>TOP2</i>   | <i>YNL088W</i> | Nitiss et al, 1992            | 1322791  |
| Fenbendazole            | <i>TUB1</i>   | <i>YML085C</i> | Hillenmeyer et al, 2010       | 20226027 |
| Fenbendazole            | <i>TUB2</i>   | <i>YFL037W</i> | Hillenmeyer et al, 2010       | 20226027 |
| Fenbendazole            | <i>TUB3</i>   | <i>YML124C</i> | Hillenmeyer et al, 2010       | 20226027 |
| Fenpropimorph           | <i>ERG2</i>   | <i>YMR202W</i> | Marcireau et al, 1990         | 2203312  |
| Fenpropimorph           | <i>ERG24</i>  | <i>YNL280C</i> | Giaever et al, 2004           | 14718668 |
| Floxuridine             | <i>CDC21</i>  | <i>YOR074C</i> | Hillenmeyer et al, 2010       | 20226027 |
| Fluconazole             | <i>ERG11</i>  | <i>YHR007C</i> | Parsons et al, 2004           | 14661025 |
| Geldanamycin            | <i>HSC82</i>  | <i>YMR186W</i> | Mandal et al, 2008            | 18443039 |
| Geldanamycin            | <i>HSP82</i>  | <i>YPL240C</i> | Mandal et al, 2008            | 18443039 |
| Guanidine hydrochloride | <i>HSP104</i> | <i>YLL026W</i> | Moosavi et al, 2010           | 20014008 |
| Haloperidol             | <i>ERG2</i>   | <i>YMR202W</i> | Moebius et al, 1996           | 8988026  |
| Haloperidol             | <i>ERG24</i>  | <i>YNL280C</i> | Silve et al, 1996             | 8798407  |
| Hydroxyurea             | <i>RNR1</i>   | <i>YER070W</i> | Lis et al, 2008               | 18400565 |
| Hydroxyurea             | <i>RNR2</i>   | <i>YJL026W</i> | Rittberg & Wright, 1989       | 2675933  |
| Hydroxyurea             | <i>RNR4</i>   | <i>YGR180C</i> | Rittberg & Wright, 1989       | 2675933  |
| Hygromycin              | <i>HOC1</i>   | <i>YJR075W</i> | Kim et al, 2006               | 16407250 |
| Idarubicin              | <i>TOP2</i>   | <i>YNL088W</i> | Dunstan et al, 2002           | 11792746 |
| Itraconazole            | <i>ERG11</i>  | <i>YHR007C</i> | Craven et al, 2007            | 17954932 |
| Ketoconazole            | <i>ERG11</i>  | <i>YHR007C</i> | Lewis et al, 1999             | 10445042 |
| Latrunculin B           | <i>ACT1</i>   | <i>YFL039C</i> | Ayscough et al, 1997          | 9128251  |
| Lithium                 | <i>INM1</i>   | <i>YHR046C</i> | Murray & Greenberg, 2000      | 10844654 |
| Lithium                 | <i>MET22</i>  | <i>YOL064C</i> | Aggarwal et al, 2005          | 15849794 |
| Lovastatin              | <i>HMG1</i>   | <i>YML075C</i> | Rine et al, 1983              | 6316322  |
| Lovastatin              | <i>HMG2</i>   | <i>YLR450W</i> | Rine et al, 1983              | 6316322  |
| mAMSA                   | <i>TOR2</i>   | <i>YKL203C</i> | Nitiss & Wang 1988            | 2845409  |
| Mebendazole             | <i>TUB1</i>   | <i>YML085C</i> | Laclette et al, 1980          | 7356473  |
| Mebendazole             | <i>TUB2</i>   | <i>YFL037W</i> | Laclette et al, 1980          | 7356473  |
| Mebendazole             | <i>TUB3</i>   | <i>YML124C</i> | Laclette et al, 1980          | 7356473  |
| Methotrexate            | <i>CDC21</i>  | <i>YOR074C</i> | Yan et al, 2008               | 18622398 |
| Methotrexate            | <i>DFR1</i>   | <i>YOR236W</i> | Huang et al, 1992             | 1427091  |
| Miconazole              | <i>ERG11</i>  | <i>YHR007C</i> | Giaever et al, 2004           | 14718668 |

|                       |              |                |                          |          |
|-----------------------|--------------|----------------|--------------------------|----------|
| Myriocin              | <i>LCB1</i>  | <i>YMR296C</i> | Walther et al, 2007      | 18034155 |
| Myriocin              | <i>LCB2</i>  | <i>YDR062W</i> | Luo et al, 2008          | 18296441 |
| NaF                   | <i>IPP1</i>  | <i>YBR011C</i> | Yan et al, 2009          | 19332878 |
| Nikkomycin X/Z        | <i>CHS1</i>  | <i>YNL192W</i> | Cabib, 1991              | 2014972  |
| Nikkomycin X/Z        | <i>CHS2</i>  | <i>YBR038W</i> | Cabib, 1991              | 2014972  |
| Nocodazole            | <i>EXO84</i> | <i>YBR102C</i> | Hillenmeyer et al, 2010  | 20226027 |
| Nocodazole            | <i>TUB1</i>  | <i>YML085C</i> | Guthrie & Wickner, 1988  | 3292537  |
| Nocodazole            | <i>TUB2</i>  | <i>YFL037W</i> | Laclette et al, 1980     | 7356473  |
| Nocodazole            | <i>TUB3</i>  | <i>YML124C</i> | Laclette et al, 1980     | 7356473  |
| Nystatin              | <i>ERG11</i> | <i>YHR007C</i> | te Welscher et al, 2010  | 20385867 |
| Omeprazole            | <i>PMA1</i>  | <i>YGL008C</i> | Monk et al, 1995         | 7548148  |
| Pentamidine           | <i>PNT1</i>  | <i>YOR266W</i> | He & Fox, 1999           | 10490599 |
| Phenylaminopyrimidine | <i>PKC1</i>  | <i>YBL105C</i> | Luesch et al, 2005       | 15664515 |
| Polyoxin D            | <i>CHS1</i>  | <i>YNL192W</i> | Cabib, 1991              | 2014972  |
| Polyoxin D            | <i>CHS2</i>  | <i>YBR038W</i> | Cabib, 1991              | 2014972  |
| Prednisolone          | <i>HSC82</i> | <i>YMR186W</i> | Mandal et al, 2008       | 18443039 |
| Prednisolone          | <i>HSP82</i> | <i>YPL240C</i> | Mandal et al, 2008       | 18443039 |
| Quinine               | <i>TAT2</i>  | <i>YOL020W</i> | Kozioe et al, 2009       | 19416971 |
| Radicicol             | <i>HSC82</i> | <i>YMR186W</i> | Taldone et al, 2009      | 19017562 |
| Radicicol             | <i>HSP82</i> | <i>YPL240C</i> | Taldone et al, 2009      | 19017562 |
| Rapamycin             | <i>TOR1</i>  | <i>YJR066W</i> | Zheng & Schreiber, 1997  | 9096347  |
| Rapamycin             | <i>TOR2</i>  | <i>YKL203C</i> | Zheng & Schreiber, 1997  | 9096347  |
| Sirtinol              | <i>SIR2</i>  | <i>YDL042C</i> | Grozinger et al, 2001    | 11483616 |
| Splitomicin           | <i>SIR2</i>  | <i>YDL042C</i> | Bedalov et al, 2001      | 11752457 |
| Staurosporine         | <i>PKC1</i>  | <i>YBL105C</i> | Yoshida et al, 1992      | 1538690  |
| Sulconazole nitrate   | <i>ERG11</i> | <i>YHR007C</i> | Dimster-Denk et al, 1999 | 10224154 |
| Sulfamethoxazole      | <i>FOL1</i>  | <i>YNL256W</i> | Patel et al, 2003        | 12820798 |
| Sulfamethoxazole      | <i>FOL3</i>  | <i>YMR113W</i> | Patel et al, 2003        | 12820798 |
| Sulfanilamide         | <i>FOL1</i>  | <i>YNL256W</i> | Patel et al, 2003        | 12820798 |
| Sulfanilamide         | <i>FOL3</i>  | <i>YMR113W</i> | Patel et al, 2003        | 12820798 |
| Tacrolimus (FK506)    | <i>CNB1</i>  | <i>YKL190W</i> | Parsons et al, 2004      | 14661025 |
| Terbinafine           | <i>ERG1</i>  | <i>YGR175C</i> | Jandrositz et al, 1991   | 1743514  |
| Thiabendazole         | <i>TUB1</i>  | <i>YML085C</i> | Chanklan et al, 2008     | 18391444 |
| Thiabendazole         | <i>TUB2</i>  | <i>YFL037W</i> | Chanklan et al, 2008     | 18391444 |
| Thiabendazole         | <i>TUB3</i>  | <i>YML124C</i> | Chanklan et al, 2008     | 18391444 |
| Tolnaftate            | <i>ERG1</i>  | <i>YGR175C</i> | White et al, 1998        | 9564569  |
| Tunicamycin           | <i>ALG7</i>  | <i>YBR243C</i> | Barnes et al, 1984       | 6096695  |
| Wortmannin            | <i>STT4</i>  | <i>YLR305C</i> | Kaufer, et al 1983       | 9346907  |

## References:

- Aggarwal M, Bansal PK, Mondal AK (2005) Molecular cloning and biochemical characterization of a 3'(2'),5'-bisphosphate nucleotidase from *Debaryomyces hansenii*. *Yeast* **22**: 457-470.
- Ayscough KR, Stryker J, Pokala N, Sanders M, Crews P, Drubin DG (1997) High rates of actin filament turnover in budding yeast and roles for actin in establishment and maintenance of cell polarity revealed using the actin inhibitor latrunculin-A. *J Cell Biol* **137**: 399-416.
- Baganz F, Hayes A, Marren D, Gardner DC, Oliver SG (1997) Suitability of replacement markers for functional analysis studies in *Saccharomyces cerevisiae*. *Yeast* **13**: 1563-1573.
- Barnes G, Hansen WJ, Holcomb CL, Rine J (1984) Asparagine-linked glycosylation in *Saccharomyces cerevisiae*: genetic analysis of an early step. *Mol Cell Biol* **4**: 2381-2388.
- Bedalov A, Gatbonton T, Irvine WP, Gottschling DE, Simon JA (2001) Identification of a small molecule inhibitor of Sir2p. *Proc Natl Acad Sci U S A* **98**: 15113-15118.
- Bohen SP (1998) Genetic and biochemical analysis of p23 and ansamycin antibiotics in the function of Hsp90-dependent signaling proteins. *Mol Cell Biol* **18**: 3330-3339.
- Cabib E (1991) Differential inhibition of chitin synthetases 1 and 2 from *Saccharomyces cerevisiae* by polyoxin D and nikkomycins. *Antimicrob Agents Chemother* **35**: 170-173.
- Camadro JM, Labbe P (1996) Cloning and characterization of the yeast HEM14 gene coding for protoporphyrinogen oxidase, the molecular target of diphenyl ether-type herbicides. *J Biol Chem* **271**: 9120-9128.
- Chanklan R, Mizunuma M, Kongkathip N, Hasitapan K, Kongkathip B, Miyakawa T (2008) Identification of *Saccharomyces cerevisiae* Tub1 alpha-tubulin as a potential target for NKH-7, a cytotoxic 1-naphthol derivative compound. *Biosci Biotechnol Biochem* **72**: 1023-1031.
- Craven RJ, Mallery JC, Hand RA (2007) Regulation of iron homeostasis mediated by the heme-binding protein Dap1 (damage resistance protein 1) via the P450 protein Erg11/Cyp51. *J Biol Chem* **282**: 36543-36551.
- Cutler NS, Heitman J, Cardenas ME (1997) STT4 is an essential phosphatidylinositol 4-kinase that is a target of wortmannin in *Saccharomyces cerevisiae*. *J Biol Chem* **272**: 27671-27677.
- Darley CP, van Wuytswinkel OC, van der Woude K, Mager WH, de Boer AH (2000) *Arabidopsis thaliana* and *Saccharomyces cerevisiae* NHX1 genes encode amiloride sensitive electroneutral Na<sup>+</sup>/H<sup>+</sup> exchangers. *Biochem J* **351**: 241-249.
- Dimster-Denk D, Rine J, Phillips J, Scherer S, Cundiff P, DeBord K, Gilliland D, Hickman S, Jarvis A, Tong L, Ashby M (1999) Comprehensive evaluation of isoprenoid biosynthesis regulation in *Saccharomyces cerevisiae* utilizing the Genome Reporter Matrix. *J Lipid Res* **40**: 850-860.
- Dunstan HM, Ludlow C, Goehle S, Cronk M, Szankasi P, Evans DR, Simon JA, Lamb JR (2002) Cell-based assays for identification of novel double-strand break-inducing agents. *J Natl Cancer Inst* **94**: 88-94.
- Geissler S, Siegers K, Schiebel E (1998) A novel protein complex promoting formation of functional alpha- and gamma-tubulin. *EMBO J* **17**: 952-966.
- Giaever G, Flaherty P, Kumm J, Proctor M, Nislow C, Jaramillo DF, Chu AM, Jordan MI, Arkin AP, Davis RW (2004) Chemogenomic profiling: identifying the functional interactions of small molecules in yeast. *Proc Natl Acad Sci U S A* **101**: 793-798.
- Goodman L, Gilman A, Brunton L, Lazo L, Parker K (2006) *Goodman & Gilman's the pharmacological basis of therapeutics*, 11 edn. New York: McGraw-Hill.

Grozinger CM, Chao ED, Blackwell HE, Moazed D, Schreiber SL (2001) Identification of a class of small molecule inhibitors of the sirtuin family of NAD-dependent deacetylases by phenotypic screening. *J Biol Chem* **276**: 38837-38843.

Guthrie BA, Wickner W (1988) Yeast vacuoles fragment when microtubules are disrupted. *J Cell Biol* **107**: 115-120.

He S, Fox TD (1999) Mutations affecting a yeast mitochondrial inner membrane protein, pnt1p, block export of a mitochondrially synthesized fusion protein from the matrix. *Mol Cell Biol* **19**: 6598-6607.

Heidler SA, Radding JA (1995) The AUR1 gene in *Saccharomyces cerevisiae* encodes dominant resistance to the antifungal agent aureobasidin A (LY295337). *Antimicrob Agents Chemother* **39**: 2765-2769.

Hillenmeyer ME, Ericson E, Davis RW, Nislow C, Koller D, Giaever G (2010) Systematic analysis of genome-wide fitness data in yeast reveals novel gene function and drug action. *Genome Biol* **11**: R30.

Hoon S, Smith AM, Wallace IM, Suresh S, Miranda M, Fung E, Proctor M, Shokat KM, Zhang C, Davis RW, Giaever G, St Onge RP, Nislow C (2008) An integrated platform of genomic assays reveals small-molecule bioactivities. *Nat Chem Biol* **4**: 498-506.

Huang T, Barclay BJ, Kalman TI, von Borstel RC, Hastings PJ (1992) The phenotype of a dihydrofolate reductase mutant of *Saccharomyces cerevisiae*. *Gene* **121**: 167-171.

Jandrositz A, Turnowsky F, Hogenauer G (1991) The gene encoding squalene epoxidase from *Saccharomyces cerevisiae*: cloning and characterization. *Gene* **107**: 155-160.

Kaufner NF, Fried HM, Schwindinger WF, Jasin M, Warner JR (1983) Cycloheximide resistance in yeast: the gene and its protein. *Nucleic Acids Res* **11**: 3123-3135.

Khozoie C, Pleass RJ, Avery SV (2009) The antimalarial drug quinine disrupts Tat2p-mediated tryptophan transport and causes tryptophan starvation. *J Biol Chem* **284**: 17968-17974.

Kim MW, Kim EJ, Kim JY, Park JS, Oh DB, Shimma Y, Chiba Y, Jigami Y, Rhee SK, Kang HA (2006) Functional characterization of the *Hansenula polymorpha* HOC1, OCH1, and OCR1 genes as members of the yeast OCH1 mannosyltransferase family involved in protein glycosylation. *J Biol Chem* **281**: 6261-6272.

Kunz BA, Barclay BJ, Game JC, Little JG, Haynes RH (1980) Induction of mitotic recombination in yeast by starvation for thymine nucleotides. *Proc Natl Acad Sci U S A* **77**: 6057-6061.

Kuranda K, Leberre V, Sokol S, Palamarczyk G, Francois J (2006) Investigating the caffeine effects in the yeast *Saccharomyces cerevisiae* brings new insights into the connection between TOR, PKC and Ras/cAMP signalling pathways. *Mol Microbiol* **61**: 1147-1166.

Laclette JP, Guerra G, Zetina C (1980) Inhibition of tubulin polymerization by mebendazole. *Biochem Biophys Res Commun* **92**: 417-423.

Lesage G, Sdicu AM, Menard P, Shapiro J, Hussein S, Bussey H (2004) Analysis of beta-1,3-glucan assembly in *Saccharomyces cerevisiae* using a synthetic interaction network and altered sensitivity to caspofungin. *Genetics* **167**: 35-49.

Lewis DF, Wiseman A, Tarbit MH (1999) Molecular modelling of lanosterol 14 alpha-demethylase (CYP51) from *Saccharomyces cerevisiae* via homology with CYP102, a unique bacterial cytochrome P450 isoform: quantitative structure-activity relationships (QSARs) within two related series of antifungal azole derivatives. *J Enzyme Inhib* **14**: 175-192.

Lis ET, O'Neill BM, Gil-Lamagnere C, Chin JK, Romesberg FE (2008) Identification of pathways controlling DNA damage induced mutation in *Saccharomyces cerevisiae*. *DNA Repair (Amst)* **7**: 801-810.

Luesch H, Wu TY, Ren P, Gray NS, Schultz PG, Supek F (2005) A genome-wide overexpression screen in yeast for small-molecule target identification. *Chem Biol* **12**: 55-63.

Luo G, Gruhler A, Liu Y, Jensen ON, Dickson RC (2008) The sphingolipid long-chain base-Pkh1/2-Ypk1/2 signaling pathway regulates eisosome assembly and turnover. *J Biol Chem* **283**: 10433-10444.

Mandal AK, Nillegoda NB, Chen JA, Caplan AJ (2008) Ydj1 protects nascent protein kinases from degradation and controls the rate of their maturation. *Mol Cell Biol* **28**: 4434-4444.

Marcireau C, Guilloton M, Karst F (1990) In vivo effects of fenpropimorph on the yeast *Saccharomyces cerevisiae* and determination of the molecular basis of the antifungal property. *Antimicrob Agents Chemother* **34**: 989-993.

Moebius FF, Bermoser K, Reiter RJ, Hanner M, Glossmann H (1996) Yeast sterol C8-C7 isomerase: identification and characterization of a high-affinity binding site for enzyme inhibitors. *Biochemistry* **35**: 16871-16878.

Monk BC, Mason AB, Abramochkin G, Haber JE, Seto-Young D, Perlin DS (1995) The yeast plasma membrane proton pumping ATPase is a viable antifungal target. I. Effects of the cysteine-modifying reagent omeprazole. *Biochim Biophys Acta* **1239**: 81-90.

Moosavi B, Wongwigkarn J, Tuite MF (2010) Hsp70/Hsp90 co-chaperones are required for efficient Hsp104-mediated elimination of the yeast [PSI(+)] prion but not for prion propagation. *Yeast* **27**: 167-179.

Murray M, Greenberg ML (2000) Expression of yeast INM1 encoding inositol monophosphatase is regulated by inositol, carbon source and growth stage and is decreased by lithium and valproate. *Mol Microbiol* **36**: 651-661.

Nitiss J, Wang JC (1988) DNA topoisomerase-targeting antitumor drugs can be studied in yeast. *Proc Natl Acad Sci U S A* **85**: 7501-7505.

Nitiss JL, Liu YX, Harbury P, Jannatipour M, Wasserman R, Wang JC (1992) Amsacrine and etoposide hypersensitivity of yeast cells overexpressing DNA topoisomerase II. *Cancer Res* **52**: 4467-4472.

Parsons AB, Brost RL, Ding H, Li Z, Zhang C, Sheikh B, Brown GW, Kane PM, Hughes TR, Boone C (2004) Integration of chemical-genetic and genetic interaction data links bioactive compounds to cellular target pathways. *Nat Biotechnol* **22**: 62-69.

Patel O, Satchell J, Baell J, Fernley R, Coloe P, Macreadie I (2003) Inhibition studies of sulfonamide-containing folate analogs in yeast. *Microb Drug Resist* **9**: 139-146.

Patel S, Sprung AU, Keller BA, Heaton VJ, Fisher LM (1997) Identification of yeast DNA topoisomerase II mutants resistant to the antitumor drug doxorubicin: implications for the mechanisms of doxorubicin action and cytotoxicity. *Mol Pharmacol* **52**: 658-666.

Pommier Y, Pourquier P, Fan Y, Strumberg D (1998) Mechanism of action of eukaryotic DNA topoisomerase I and drugs targeted to the enzyme. *Biochim Biophys Acta* **1400**: 83-105.

Preveral S, Ansoborlo E, Mari S, Vavasseur A, Forestier C (2006) Metal(loid)s and radionuclides cytotoxicity in *Saccharomyces cerevisiae*. Role of YCF1, glutathione and effect of buthionine sulfoximine. *Biochimie* **88**: 1651-1663.

Rine J, Hansen W, Hardeman E, Davis RW (1983) Targeted selection of recombinant clones through gene dosage effects. *Proc Natl Acad Sci U S A* **80**: 6750-6754.

Silve S, Dupuy PH, Labit-Lebouteiller C, Kaghad M, Chalon P, Rahier A, Taton M, Lupker J, Shire D, Loison G. (1996) Emopamil-binding protein, a mammalian protein that binds a series of structurally diverse neuroprotective agents, exhibits delta8-delta7 sterol isomerase activity in yeast. *J Biol Chem*. **271**:22434-22440.

Smith AM, Heisler LE, Mellor J, Kaper F, Thompson MJ, Chee M, Roth FP, Giaever G, Nislow C (2009) Quantitative phenotyping via deep barcode sequencing. *Genome Res* **19**: 1836-1842.

Stearns T, Hoyt MA, Botstein D (1990) Yeast mutants sensitive to antimicrotubule drugs define three genes that affect microtubule function. *Genetics* **124**: 251-262.

Stocklein W, Piepersberg W (1980) Binding of cycloheximide to ribosomes from wild-type and mutant strains of *Saccharomyces cerevisiae*. *Antimicrob Agents Chemother* **18**: 863-867.

Taldone T, Sun W, Chiosis G (2009) Discovery and development of heat shock protein 90 inhibitors. *Bioorg Med Chem* **17**: 2225-2235.

te Welscher YM, Jones L, van Leeuwen MR, Dijksterhuis J, de Kruijff B, Eitzen G, Breukink E (2010) Natamycin inhibits vacuole fusion at the priming phase via a specific interaction with ergosterol. *Antimicrob Agents Chemother* **54**: 2618-2625.

Truan G, Epinat JC, Rougeulle C, Cullin C, Pompon D (1994) Cloning and characterization of a yeast cytochrome b5-encoding gene which suppresses ketoconazole hypersensitivity in a NADPH-P-450 reductase-deficient strain. *Gene* **142**: 123-127.

Walther TC, Aguilar PS, Frohlich F, Chu F, Moreira K, Burlingame AL, Walter P (2007) Pkh-kinases control eisosome assembly and organization. *EMBO J* **26**: 4946-4955.

White TC, Marr KA, Bowden RA (1998) Clinical, cellular, and molecular factors that contribute to antifungal drug resistance. *Clin Microbiol Rev* **11**: 382-402.

Yan Z, Berbenetz NM, Giaever G, Nislow C (2009) Precise gene-dose alleles for chemical genetics. *Genetics* **182**: 623-626.

Yan Z, Costanzo M, Heisler LE, Paw J, Kaper F, Andrews BJ, Boone C, Giaever G, Nislow C (2008) Yeast Barcoders: a chemogenomic application of a universal donor-strain collection carrying bar-code identifiers. *Nat Methods* **5**: 719-725.

Yoshida S, Ikeda E, Uno I, Mitsuzawa H (1992) Characterization of a staurosporine- and temperature-sensitive mutant, *stt1*, of *Saccharomyces cerevisiae*: *STT1* is allelic to *PKC1*. *Mol Gen Genet* **231**: 337-344.

Yun SL, Suelter CH (1979) Modification of yeast pyruvate kinase by an active site-directed reagent, bromopyruvate. *J Biol Chem* **254**: 1811-1815.

Zheng XF, Schreiber SL (1997) Target of rapamycin proteins and their kinase activities are required for meiosis. *Proc Natl Acad Sci U S A* **94**: 3070-3075.



**Supplementary Table 2.** Drug synergy predictions made using synergistic genetic interactions between genes encoding drug targets.

| Drug(s)       | Target | Drug(s)                                          | Target | Genetic Interaction Scores between Genes Encoding Targets <sup>†</sup> | Drug Pair tested                                                                      | Reason if not tested <sup>‡</sup> |
|---------------|--------|--------------------------------------------------|--------|------------------------------------------------------------------------|---------------------------------------------------------------------------------------|-----------------------------------|
| Myriocin      | Lcb2   | Cyclosporin A, Tacrolimus (FK506)                | Cnb1   | 0.0365, -0.1859, 0                                                     | Myriocin - Tacrolimus                                                                 | tested                            |
| Myriocin      | Lcb2   | Ansamycin, Geldanamycin, Prednisolone, Radicicol | Hsp82  | 0, -0.3218, 0                                                          | Myriocin - Radicicol                                                                  | tested                            |
| Myriocin      | Lcb2   | Quinine                                          | Tat2   | 0, -0.2611, 0                                                          | Myriocin - Quinine                                                                    | tested                            |
| Myriocin      | Lcb1   | Hygromycin                                       | Hoc1   | -0.1577, SG, SG                                                        | Myriocin - Hygromycin                                                                 | tested                            |
| Lithium       | Inm1   | Cyclosporin A, Tacrolimus (FK506)                | Cnb1   | 0, -0.0983                                                             | Lithium - Tacrolimus                                                                  | tested                            |
| Lithium       | Inm1   | Ansamycin, Geldanamycin, Prednisolone, Radicicol | Hsc82  | 0, SG, SG                                                              | Lithium - Radicicol                                                                   | tested                            |
| Lithium       | Inm1   | Ansamycin, Geldanamycin, Prednisolone, Radicicol | Hsp82  | 0, 0, SG, SG                                                           | Lithium - Radicicol                                                                   | tested                            |
| Lithium       | Met22  | Ansamycin, Geldanamycin, Prednisolone, Radicicol | Hsp82  | 0, SL, SL                                                              | Lithium - Radicicol                                                                   | tested                            |
| Lithium       | Met22  | Aureobasidin A                                   | Aur1   | -0.1134                                                                | Lithium - Aureobasidin A                                                              | tested                            |
| Latrunculin B | Act1   | Cyclosporin A, Tacrolimus (FK506)                | Cnb1   | 0.1050, -0.1181, 0, 0, 0, 0                                            | Latrunculin B - Tacrolimus                                                            | tested                            |
| Latrunculin B | Act1   | Dyclonine, Fenpropimorph, Haloperidol            | Erg2   | -0.0972, 0, 0, 0.0515, 0, 0.0657, 0, -0.1119, 0, 0, 0                  | Latrunculin B - Dyclonine, Latrunculin B - Haloperidol, Latrunculin B - Fenpropimorph | tested                            |
| Hygromycin    | Hoc1   | Latrunculin B                                    | Act1   | -0.2238, -0.0478, 0, 0, -0.1292, SG, SG                                | Hygromycin - Latrunculin B                                                            | tested                            |

|                                                                                        |        |                                                  |       |                                                  |                             |        |
|----------------------------------------------------------------------------------------|--------|--------------------------------------------------|-------|--------------------------------------------------|-----------------------------|--------|
| Cycloheximide                                                                          | Rpl41A | Ansamycin, Geldanamycin, Prednisolone, Radicicol | Hsp82 | 0, SL, SL                                        | Cycloheximide - Radicicol   | tested |
| Benomyl, Carbendazim, Colchicine, Fenbendazole, Mebendazole, Nocodazole, Thiabendazole | Tub2   | Ansamycin, Geldanamycin, Prednisolone, Radicicol | Hsc82 | SG, SG                                           | Benomyl - Radicicol         | tested |
| Benomyl, Carbendazim, Colchicine, Fenbendazole, Mebendazole, Nocodazole, Thiabendazole | Tub2   | Ansamycin, Geldanamycin, Prednisolone, Radicicol | Hsp82 | SG, SG                                           | Benomyl - Radicicol         | tested |
| Benomyl, Carbendazim, Fenbendazole, Mebendazole                                        | Tub1   | Ansamycin, Geldanamycin, Prednisolone, Radicicol | Hsc82 | SG, SG                                           | Benomyl - Radicicol         | tested |
| Benomyl, Carbendazim, Fenbendazole, Mebendazole                                        | Tub1   | Ansamycin, Geldanamycin, Prednisolone, Radicicol | Hsp82 | SG, SG                                           | Benomyl - Radicicol         | tested |
| Benomyl, Carbendazim, Colchicine, Fenbendazole, Mebendazole, Nocodazole, Thiabendazole | Tub3   | Pentamidine                                      | Pnt1  | -0.3242, 0, SL, SL                               | Benomyl - Pentamidine       | tested |
| Benomyl, Carbendazim, Colchicine, Fenbendazole, Mebendazole, Nocodazole, Thiabendazole | Tub3   | Latrunculin B                                    | Act1  | -0.2028, -0.0472, 0, 0, -0.0970, -0.0419, SG, SG | Benomyl - Latrunculin B     | tested |
| Benomyl, Carbendazim, Colchicine, Fenbendazole, Mebendazole, Nocodazole, Thiabendazole | Tub3   | Calyculin A                                      | Glc7  | 0, SG, SG                                        | Benomyl - Calyculin A       | tested |
| Wortmannin                                                                             | Stt4   | Phenylaminopyrimidine, Staurosporine             | Pkc1  | SG, SG                                           | Wortmannin - Staurosporine  | tested |
| Wortmannin                                                                             | Stt4   | Aureobasidin A                                   | Aur1  | SL, SL                                           | Wortmannin - Aureobasidin A | tested |
| Tunicamycin                                                                            | Alg7   | Latrunculin B                                    | Act1  | SL, SL                                           | Tunicamycin - Latrunculin B | tested |
| Caffeine, Rapamycin                                                                    | Tor1   | Terbinafine, Tolnaftate                          | Erg1  | SG, SG                                           | Terbinafine-Rapamycin       | tested |
| Ansamycin, Geldanamycin, Prednisolone, Radicicol                                       | Hsc82  | Terbinafine, Tolnaftate                          | Erg1  | SG, SG                                           | Terbinafine-Radicicol       | tested |
| Ansamycin, Geldanamycin, Prednisolone, Radicicol                                       | Hsp82  | Terbinafine, Tolnaftate                          | Erg1  | SG, SG                                           | Terbinafine-Radicicol       | tested |

|                                                  |       |                                                  |       |                                        |                                                                                       |        |
|--------------------------------------------------|-------|--------------------------------------------------|-------|----------------------------------------|---------------------------------------------------------------------------------------|--------|
| Phenylaminopyrimidine, Staurosporine             | Pkc1  | Cyclosporin A, Tacrolimus (FK506)                | Cnb1  | -0.3690, 0, SG, SG                     | Staurosporine - Tacrolimus                                                            | tested |
| Phenylaminopyrimidine, Staurosporine             | Pkc1  | Ansamycin, Geldanamycin, Prednisolone, Radicicol | Hsc82 | -0.0620, -0.0686, -0.1156, 0, 0        | Staurosporine - Radicicol                                                             | tested |
| Phenylaminopyrimidine, Staurosporine             | Pkc1  | Lithium                                          | Met22 | -0.1208, 0, SG, SG                     | Staurosporine - Lithium                                                               | tested |
| Phenylaminopyrimidine, Staurosporine             | Pkc1  | Hygromycin                                       | Hoc1  | 0.0867, 0, SG, SG                      | Staurosporine - Hygromycin                                                            | tested |
| Phenylaminopyrimidine, Staurosporine             | Pkc1  | Dyclonine, Fenpropimorph, Haloperidol            | Erg2  | 0, 0, 0, -0.1300, -0.0944              | Staurosporine - Dyclonine, Staurosporine - Haloperidol, Staurosporine - Fenpropimorph | tested |
| Caffeine, Rapamycin                              | Tor1  | Ansamycin, Geldanamycin, Prednisolone, Radicicol | Hsc82 | 0, SG, SG                              | Rapamycin - Radicicol                                                                 | tested |
| Caffeine, Rapamycin                              | Tor1  | Ansamycin, Geldanamycin, Prednisolone, Radicicol | Hsp82 | 0, 0, SG, SG                           | Rapamycin - Radicicol                                                                 | tested |
| Mamsa, Rapamycin                                 | Tor2  | Ansamycin, Geldanamycin, Prednisolone, Radicicol | Hsc82 | 0, 0, 0, SG, SG                        | Rapamycin - Radicicol                                                                 | tested |
| Mamsa, Rapamycin                                 | Tor2  | Ansamycin, Geldanamycin, Prednisolone, Radicicol | Hsp82 | 0, 0, 0, SG, SG                        | Rapamycin - Radicicol                                                                 | tested |
| Mamsa, Rapamycin                                 | Tor2  | Lithium                                          | Inm1  | -0.0932, 0, 0                          | Rapamycin - Lithium                                                                   | tested |
| Caffeine, Rapamycin                              | Tor1  | Latrunculin B                                    | Act1  | 0, -0.0801, -0.0535, 0, 0, 0           | Rapamycin - Latrunculin B                                                             | tested |
| Mamsa, Rapamycin                                 | Tor2  | Hygromycin                                       | Hoc1  | 0, -0.0829, 0                          | Rapamycin - Hygromycin                                                                | tested |
| Ansamycin, Geldanamycin, Prednisolone, Radicicol | Hsc82 | Latrunculin B                                    | Act1  | -0.1247, 0, 0, 0, 0, 0, SG, SG, SG, SG | Radicicol - Latrunculin B                                                             | tested |
| Ansamycin, Geldanamycin, Prednisolone, Radicicol | Hsp82 | Latrunculin B                                    | Act1  | 0, -0.0467, 0, 0, 0.1094, 0, SG, SG    | Radicicol - Latrunculin B                                                             | tested |

|                                                                                        |       |                                                  |       |                                 |                        |                                                 |
|----------------------------------------------------------------------------------------|-------|--------------------------------------------------|-------|---------------------------------|------------------------|-------------------------------------------------|
| Ansamycin, Geldanamycin, Prednisolone, Radicicol                                       | Hsp82 | Hygromycin                                       | Hoc1  | 0, 0, SL, SL                    | Radicicol - Hygromycin | tested                                          |
| Ansamycin, Geldanamycin, Prednisolone, Radicicol                                       | Hsc82 | Clozapine                                        | Cox17 | SG, SG                          | Radicicol - Clozapine  | tested                                          |
| Ansamycin, Geldanamycin, Prednisolone, Radicicol                                       | Hsp82 | Clozapine                                        | Cox17 | SG, SG                          | Radicicol - Clozapine  | tested                                          |
| Quinine                                                                                | Tat2  | Ansamycin, Geldanamycin, Prednisolone, Radicicol | Hsc82 | SG, SG                          | Quinine - Radicicol    | tested                                          |
| Quinine                                                                                | Tat2  | Ansamycin, Geldanamycin, Prednisolone, Radicicol | Hsp82 | 0, SG, SG                       | Quinine - Radicicol    | tested                                          |
| Amphotericin B                                                                         | Erg28 | Ansamycin, Geldanamycin, Prednisolone, Radicicol | Hsp82 | SL, SL                          | none                   | at least one drug targets ergosterol metabolism |
| Amphotericin B                                                                         | Erg28 | Fenpropimorph                                    | Erg24 | SL, SL                          | none                   | at least one drug targets ergosterol metabolism |
| Amsacrine, Doxorubicin, Idarubicin                                                     | Top2  | Camptothecin                                     | Top1  | SL, SG, SL, SG                  | none                   | Camptothecin does not mimic deletion of Top1    |
| Ansamycin, Geldanamycin, Prednisolone, Radicicol                                       | Hsp82 | Ansamycin, Geldanamycin, Prednisolone, Radicicol | Hsc82 | -0.4932, SL, SG, SG, SL, SG, SG | none                   | predicted drug pair involves the same drug(s)   |
| Ansamycin, Geldanamycin, Prednisolone, Radicicol                                       | Hsc82 | Dyclonine, Fenpropimorph, Haloperidol            | Erg2  | SG, SG                          | none                   | at least one drug targets ergosterol metabolism |
| Ansamycin, Geldanamycin, Prednisolone, Radicicol                                       | Hsp82 | Dyclonine, Fenpropimorph, Haloperidol            | Erg2  | 0, SG, SG                       | none                   | at least one drug targets ergosterol metabolism |
| Atorvastatin, Compactin, Lovastatin                                                    | Hmg2  | Atorvastatin, Cervastatin, Compactin, Lovastatin | Hmg1  | -0.8069, SL, SG, SG, SL, SG, SG | none                   | predicted drug pair involves the same drug(s)   |
| Benomyl, Carbendazim, Colchicine, Fenbendazole, Mebendazole, Nocodazole, Thiabendazole | Tub3  | Benomyl, Carbendazim, Fenbendazole, Mebendazole  | Tub1  | SL, SL                          | none                   | predicted drug pair involves the same drug(s)   |

|                                   |        |                                       |       |                                           |      |                                                          |
|-----------------------------------|--------|---------------------------------------|-------|-------------------------------------------|------|----------------------------------------------------------|
| Caffeine, Rapamycin               | Tor1   | Hydroxyurea                           | Rnr1  | SG, SG                                    | none | Hydroxyurea did not inhibit cell growth                  |
| Calyculin A                       | Glc7   | Caspofungin                           | Fks1  | -0.1227, SG, SG                           | none | Caspofungin was not obtained                             |
| Camptothecin                      | Top1   | Calyculin A                           | Glc7  | -0.1179                                   | none | Camptothecin does not mimic deletion of Top1             |
| Camptothecin                      | Top1   | Caspofungin                           | Fks1  | -0.0559, 0, SL, SL                        | none | Camptothecin does not mimic deletion of Top1             |
| Camptothecin                      | Top1   | Sirtinol, Splitomicin                 | Sir2  | SG, SG                                    | none | Camptothecin does not mimic deletion of Top1             |
| Caspofungin                       | Fks1   | Cyclosporin A, Tacrolimus (FK506)     | Cnb1  | -0.0782, SL, SL                           | none | Caspofungin was not obtained                             |
| Caspofungin                       | Fks1   | Latrunculin B                         | Act1  | 0, 0, 0, -0.1290, -0.0914, 0.0566, SG, SG | none | Caspofungin was not obtained                             |
| Caspofungin                       | Fks1   | Nocodazole                            | Exo84 | -0.1919                                   | none | Nocodazole did not inhibit cell growth                   |
| Cyclosporin A, Tacrolimus (FK506) | Cnb1   | Nikkomycin X/Z, Polyoxin D            | Chs2  | SL, SL                                    | none | Nikkomycin X/Z or Polyoxin D did not inhibit cell growth |
| Fenpropimorph                     | Erg24  | Amphotericin B                        | Erg28 | SL,SL                                     | none | at least one drug targets ergosterol metabolism          |
| Fenpropimorph                     | Erg24  | Dyclonine, Fenpropimorph, Haloperidol | Erg2  | SL, SL                                    | none | at least one drug targets ergosterol metabolism          |
| Guanidine hydrochloride           | Hsp104 | Nocodazole                            | Exo84 | -0.1562                                   | none | Nocodazole did not inhibit cell growth                   |

|                                      |      |                                                  |       |                                           |      |                                                    |
|--------------------------------------|------|--------------------------------------------------|-------|-------------------------------------------|------|----------------------------------------------------|
| Hydroxyurea                          | Rnr4 | Ansamycin, Geldanamycin, Prednisolone, Radicicol | Hsc82 | SG, SG                                    | none | Hydroxyurea did not inhibit cell growth            |
| Hydroxyurea                          | Rnr4 | Ansamycin, Geldanamycin, Prednisolone, Radicicol | Hsp82 | SG, SG                                    | none | Hydroxyurea did not inhibit cell growth            |
| Hygromycin                           | Hoc1 | Caspofungin                                      | Fks1  | -0.1356, 0, SG, SG                        | none | Caspofungin was not obtained                       |
| Mamsa, Rapamycin                     | Tor2 | Caffeine, Rapamycin                              | Tor1  | -0.6085, -0.4658, -0.1682, SG, SG, SG, SG | none | predicted drug pair involves the same drug(s)      |
| Omeprazole                           | Pma1 | Hygromycin                                       | Hoc1  | -0.1204, SG, SG                           | none | Omeprazole did not inhibit cell growth             |
| Phenylaminopyrimidine, Staurosporine | Pkc1 | Atorvastatin, Cervastatin, Compactin, Lovastatin | Hmg1  | -0.1601, 0.0396, 0, 0, 0                  | none | Compactin & Lovastatin did not inhibit cell growth |
| Phenylaminopyrimidine, Staurosporine | Pkc1 | Caspofungin                                      | Fks1  | -0.4344, 0, SL, SG, SL, SG                | none | Caspofungin was not obtained                       |
| Sirtinol, Splitomicin                | Sir2 | Latrunculin B                                    | Act1  | SG, SG                                    | none | Sirtinol activates Sir2                            |
| Wortmannin                           | Stt4 | Caspofungin                                      | Fks1  | SL, SL                                    | none | Caspofungin was not obtained                       |

† Genetic interactions learned from BioGrid are given as SL: Synthetic Lethality, SG: Synthetic Growth Defect / Negative Genetic. Genetic Interactions learned from Costanzo et al. and Baryshnikova et al. are given as scores described in these works, where a score < -0.08 and  $p < 0.05$  is considered as a negative genetic interaction.

‡ Testing of some drug pairs that included an ergosterol pathway targeting drug were omitted since ergosterol pathway targeting drugs are predicted to be synergistic according to the bioavailability model.

**Supplementary Figure 1.** For each pairwise drug interaction experiment, drug pairs were combined in 8 x 8 matrices where the concentration of one drug was linearly increased along each axis. On the left, growth rates for each 8 x 8 matrix is shown (white corresponds to high growth and black corresponds to no growth. Color bar is identical to Figure 2.). Also shown are sample isoboles (white solid lines), largest isobole used for drug interaction scoring (yellow dots), and drug interaction scores. On the right, raw data plots are shown, where the x axis of each cell corresponds to time (0 to 24 hours), and the y axis corresponds to OD<sub>595</sub> measurements (0 to 1). For drug name abbreviations, see Table 1.

**Index:**

|        |         |          |         |         |         |           |         |
|--------|---------|----------|---------|---------|---------|-----------|---------|
| i.     | 5FU-5FU | xxiii.   | Ben-Ben | xlv.    | Bro-Bro | lxvii.    | Cal-Lat |
| ii.    | 5FU-Ben | xxiv.    | Ben-Bro | xlvi.   | Bro-Cal | lxviii.   | Cal-Pen |
| iii.   | 5FU-Lat | xxv.     | Ben-C3P | xlvii.  | Bro-Dyc | lxix.     | Cal-Rap |
| iv.    | 5FU-Pen | xxvi.    | Ben-Cal | xlviii. | Bro-Fen | lxx.      | Cal-Sta |
| v.     | 5FU-Sta | xxvii.   | Ben-Chl | xlix.   | Bro-Hal | lxxi.     | Cal-Tac |
| vi.    | 5FU-Tac | xxviii.  | Ben-Cis | l.      | Bro-Lat | lxxii.    | Cal-Ter |
| vii.   | 5FU-Ter | xxix.    | Ben-Cyc | li.     | Bro-Pen | lxxiii.   | Cal-Tun |
| viii.  | AbA-Lit | xxx.     | Ben-Dyc | lii.    | Bro-Rap | lxxiv.    | Can-Can |
| ix.    | AbA-Wor | xxxi.    | Ben-Fen | liii.   | Bro-Sta | lxxv.     | Can-Lat |
| x.     | AmB-AmB | xxxii.   | Ben-Hal | liv.    | Bro-Tac | lxxvi.    | Can-Pen |
| xi.    | AmB-Ben | xxxiii.  | Ben-Lat | lv.     | Bro-Ter | lxxvii.   | Can-Sta |
| xii.   | AmB-Pen | xxxiv.   | Ben-Met | lvi.    | Bro-Tun | lxxviii.  | Can-Tac |
| xiii.  | AmB-Sta | xxxv.    | Ben-MMS | lvii.   | C3P-C3P | lxxix.    | Can-Ter |
| xiv.   | AmB-Tac | xxxvi.   | Ben-Myr | lviii.  | C3P-Lat | lxxx.     | Chl-Chl |
| xv.    | AmB-Ter | xxxvii.  | Ben-Pen | lix.    | C3P-Pen | lxxxi.    | Chl-Lat |
| xvi.   | Ani-Ani | xxxviii. | Ben-Qmy | lx.     | C3P-Sta | lxxxii.   | Chl-Pen |
| xvii.  | Ani-Ben | xxxix.   | Ben-Rad | lxi.    | C3P-Tac | lxxxiii.  | Chl-Sta |
| xviii. | Ani-Lat | xl.      | Ben-Rap | lxii.   | C3P-Ter | lxxxiv.   | Chl-Tac |
| xix.   | Ani-Pen | xli.     | Ben-Sta | lxiii.  | Cal-Cal | lxxxv.    | Chl-Ter |
| xx.    | Ani-Sta | xlii.    | Ben-Tac | lxiv.   | Cal-Dyc | lxxxvi.   | Cis-Cis |
| xxi.   | Ani-Tac | xliii.   | Ben-Ter | lxv.    | Cal-Fen | lxxxvii.  | Cis-Lat |
| xxii.  | Ani-Ter | xliv.    | Ben-Tun | lxvi.   | Cal-Hal | lxxxviii. | Cis-Sta |

|         |         |           |         |          |         |            |         |
|---------|---------|-----------|---------|----------|---------|------------|---------|
| lxxxix. | Cis-Tac | cxvii.    | Fen-Tun | cxlv.    | Lit-Rap | clxxxiii.  | Qmy-Qmy |
| xc.     | Cis-Ter | cxviii.   | Hal-Hal | cxlvi.   | Lit-Sta | clxxxiv.   | Qmy-Sta |
| xcii.   | Cyc-Cyc | cxix.     | Hal-Lat | cxlvii.  | Lit-Tac | clxxxv.    | Qmy-Tac |
| xciii.  | Cyc-Lat | cxx.      | Hal-Pen | cxlviii. | Met-Met | clxxxvi.   | Qmy-Ter |
| xciv.   | Cyc-Pen | cxxi.     | Hal-Rap | cxlix.   | Met-Pen | clxxxvii.  | Rad-Rap |
| xcv.    | Cyc-Rad | cxxii.    | Hal-Sta | cl.      | Met-Sta | clxxxviii. | Rad-Sta |
| xcvi.   | Cyc-Sta | cxxiii.   | Hal-Tac | cli.     | Met-Tac | clxxxix.   | Rad-Tac |
| xcvii.  | Cyc-Tac | cxxiv.    | Hal-Ter | clii.    | Met-Ter | clxxx.     | Rad-Ter |
| xcviii. | Cyc-Ter | cxxv.     | Hal-Tun | cliii.   | MMS-MMS | clxxxxi.   | Rap-Rap |
| xcix.   | Dyc-Dyc | cxxvi.    | Hyg-Lat | cliv.    | MMS-Pen | clxxxii.   | Rap-Sta |
| c.      | Dyc-Fen | cxxvii.   | Hyg-Myr | clv.     | MMS-Sta | clxxxiii.  | Rap-Tac |
| ci.     | Dyc-Hal | cxxviii.  | Hyg-Rad | clvi.    | MMS-Tac | clxxxiv.   | Rap-Ter |
| cii.    | Dyc-Lat | cxxix.    | Hyg-Rap | clvii.   | MMS-Ter | clxxxv.    | Rap-Tun |
| ciii.   | Dyc-Pen | cxix.     | Hyg-Sta | clviii.  | Myr-Myr | clxxxvi.   | Sta-Sta |
| civ.    | Dyc-Rap | cxix.     | Lat-Lat | clix.    | Myr-Pen | clxxxvii.  | Sta-Tac |
| cv.     | Dyc-Sta | cxixii.   | Lat-Met | clx.     | Myr-Qnn | clxxxviii. | Sta-Tam |
| cvi.    | Dyc-Tac | cxixiii.  | Lat-MMS | clxi.    | Myr-Rad | clxxxix.   | Sta-Ter |
| cvii.   | Dyc-Ter | cxixiv.   | Lat-Myr | clxii.   | Myr-Sta | cxc.       | Sta-Tun |
| cviii.  | Dyc-Tun | cxixv.    | Lat-Pen | clxiii.  | Myr-Tac | cxc.       | Sta-Wor |
| cix.    | Fen-Fen | cxixvi.   | Lat-Qmy | clxiv.   | Myr-Ter | cxcii.     | Tac-Tac |
| cx.     | Fen-Hal | cxixvii.  | Lat-Rad | clxv.    | Pen-Qmy | cxciii.    | Tac-Tam |
| cxii.   | Fen-Lat | cxixviii. | Lat-Rap | clxvi.   | Pen-Rad | cxciv.     | Tac-Ter |
| cxiii.  | Fen-Pen | cxixix.   | Lat-Sta | clxvii.  | Pen-Rap | cxcv.      | Tac-Tun |
| cxiv.   | Fen-Rap | cl.       | Lat-Tac | clxviii. | Pen-Sta | cxcvi.     | Tam-Tam |
| cxv.    | Fen-Sta | cl.       | Lat-Tam | clxix.   | Pen-Tac | cxcvii.    | Tam-Ter |
| cxvi.   | Fen-Tac | clii.     | Lat-Ter | clxx.    | Pen-Ter | cxcviii.   | Ter-Ter |
| cxvii.  | Fen-Ter | cliii.    | Lat-Tun | clxxi.   | Pen-Tun | cxcix.     | Ter-Tun |
| cxviii. | Fen-Tun | clxiv.    | Lit-Rad | clxxii.  | Qnn-Rad | cc.        | Tun-Tun |



$\alpha = 0.2618195$

i

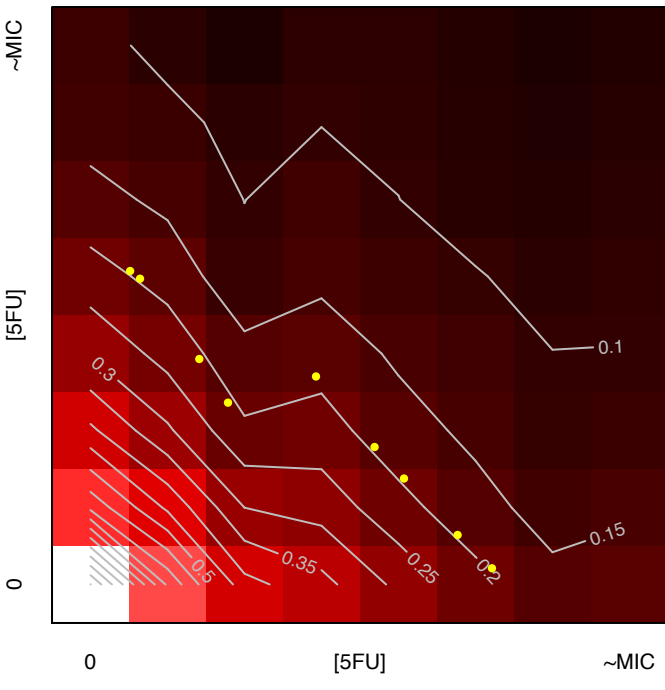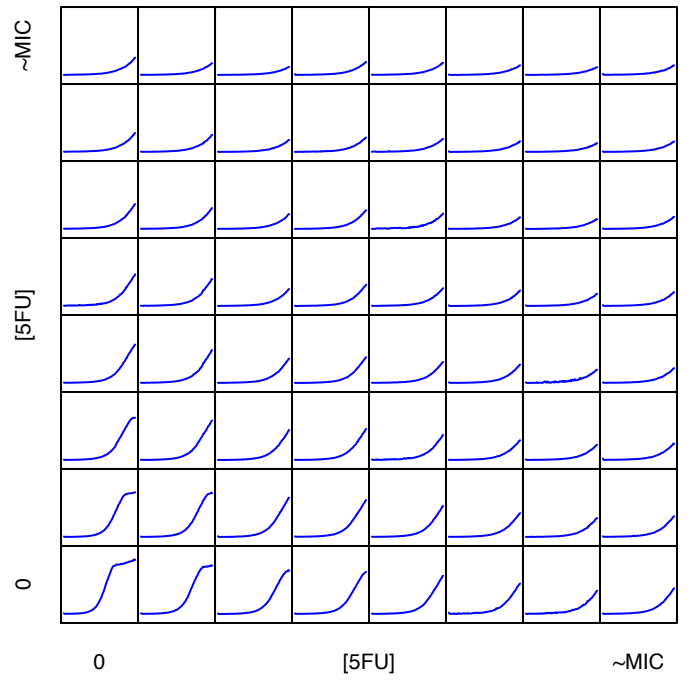

$\alpha = 0.05621137$

ii

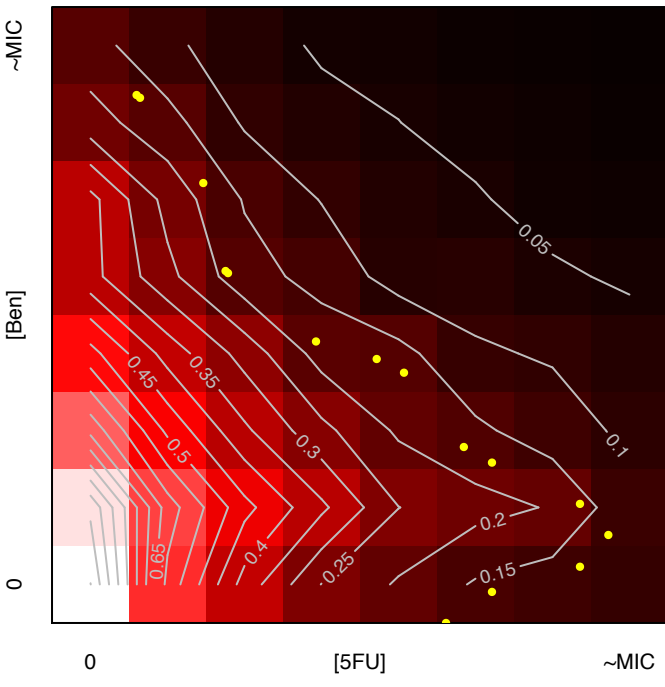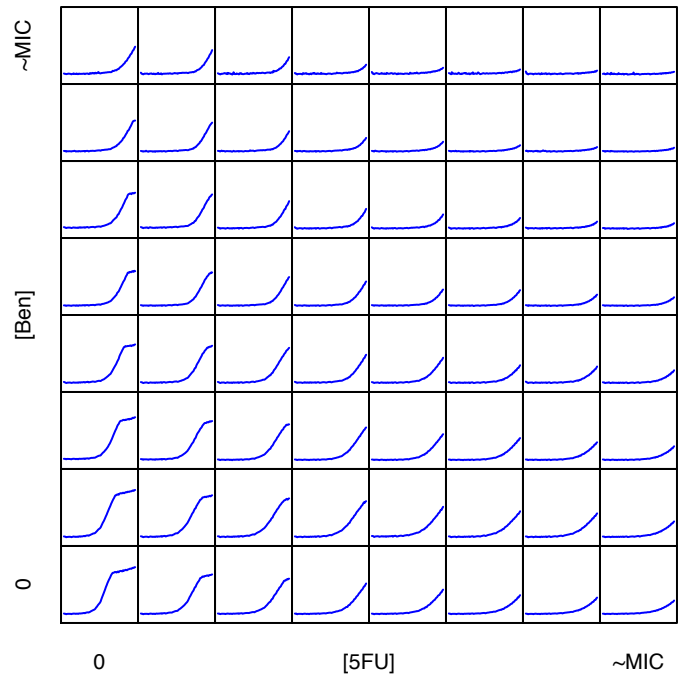

$\alpha = 2.138712$

iii

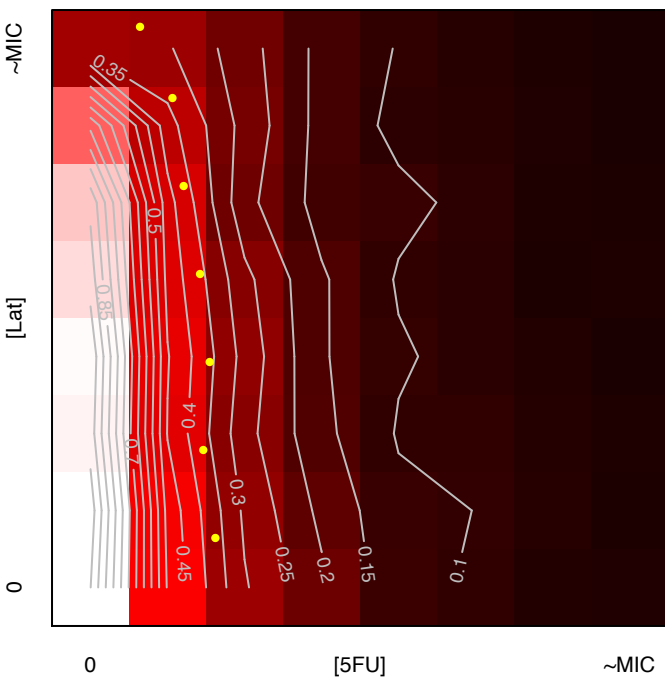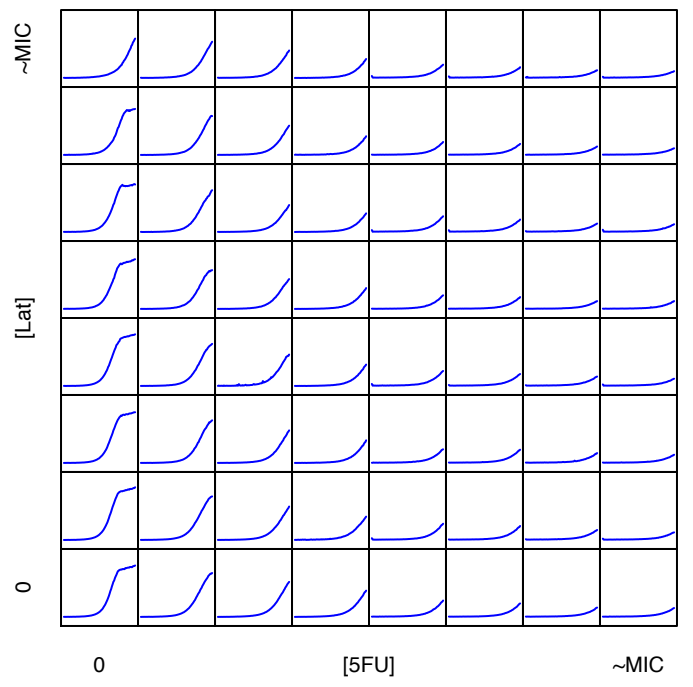

$\alpha = -0.5131408$

iv

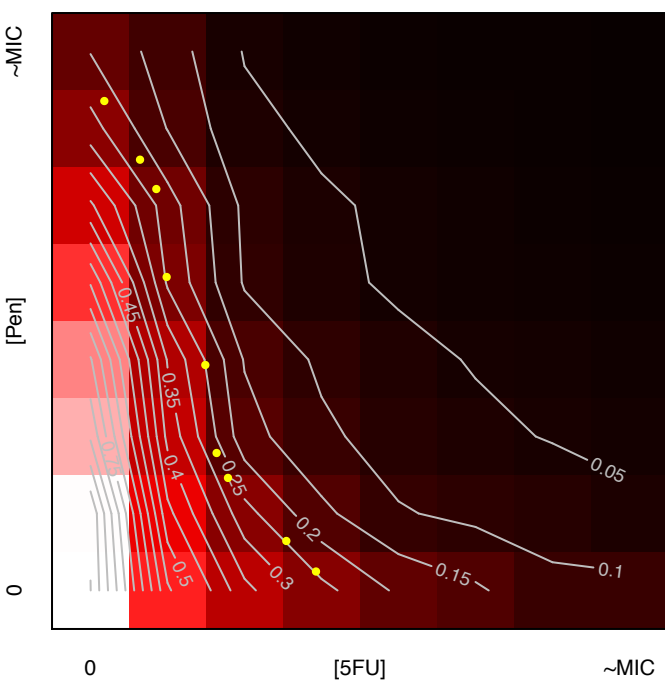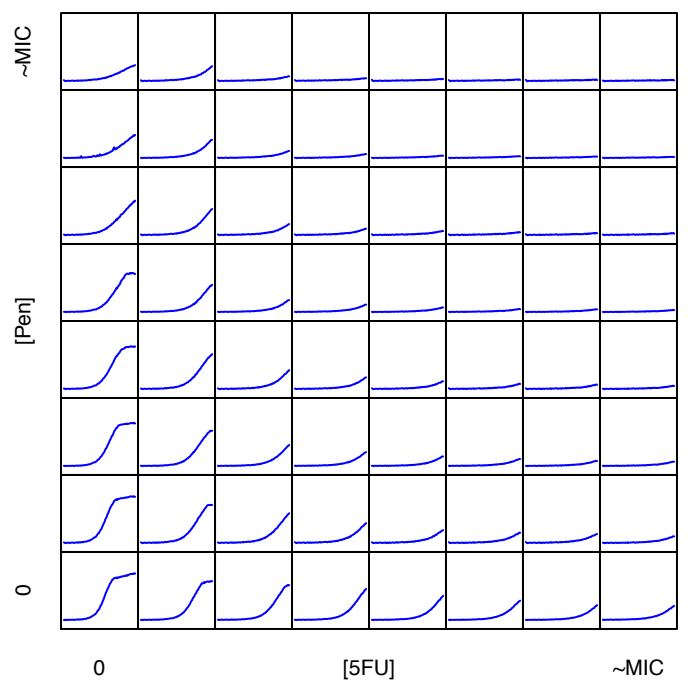

$\alpha = 2.375063$

v

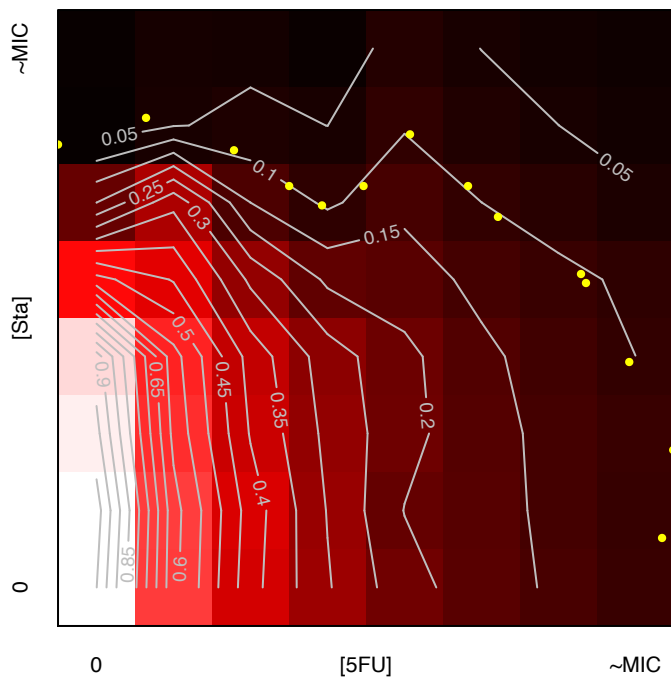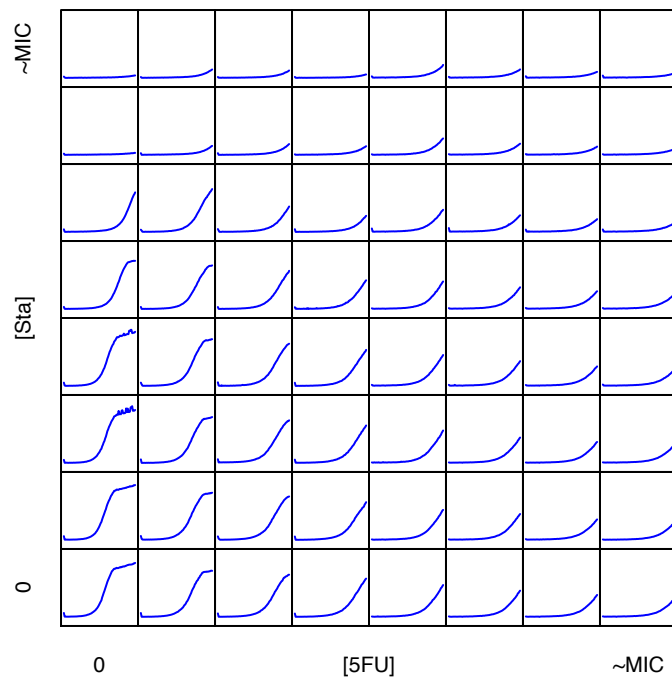

$\alpha = -0.4839801$

vi

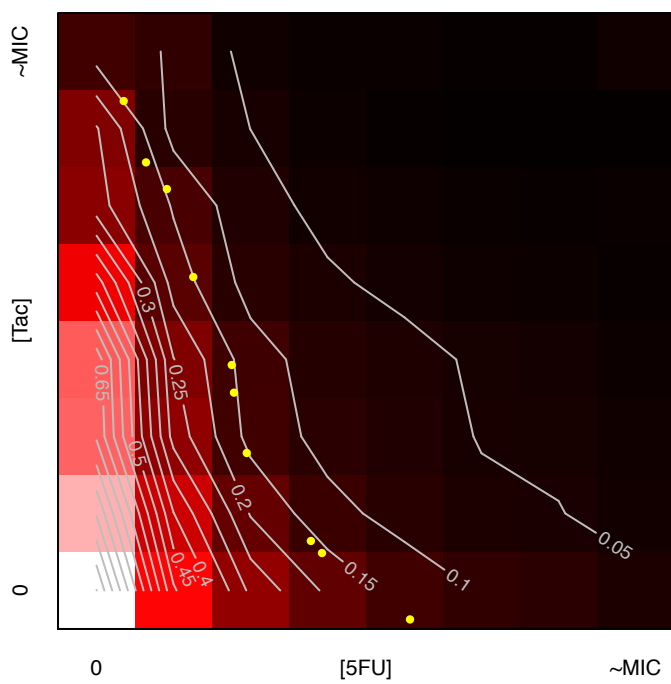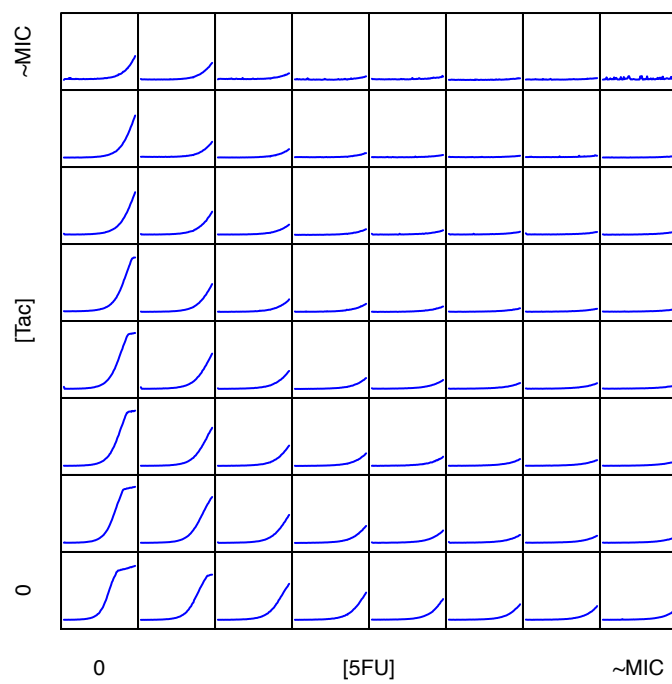

$\alpha = -1.502175$

vii

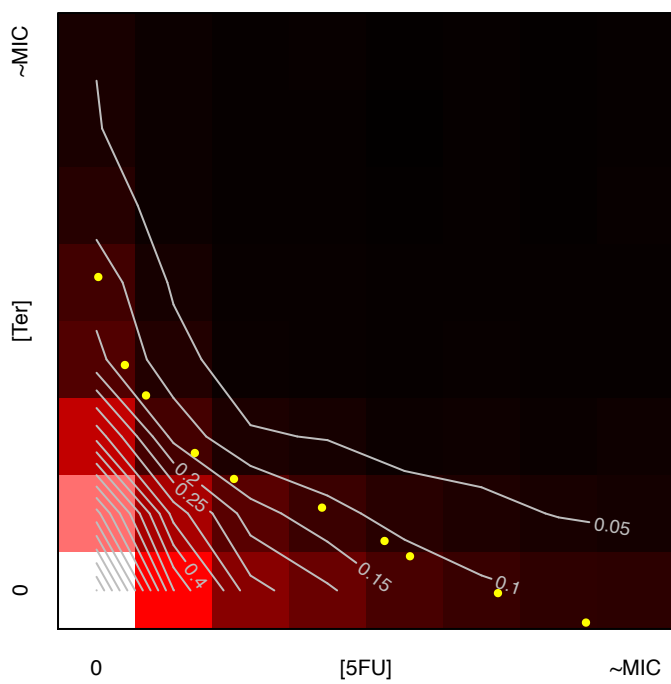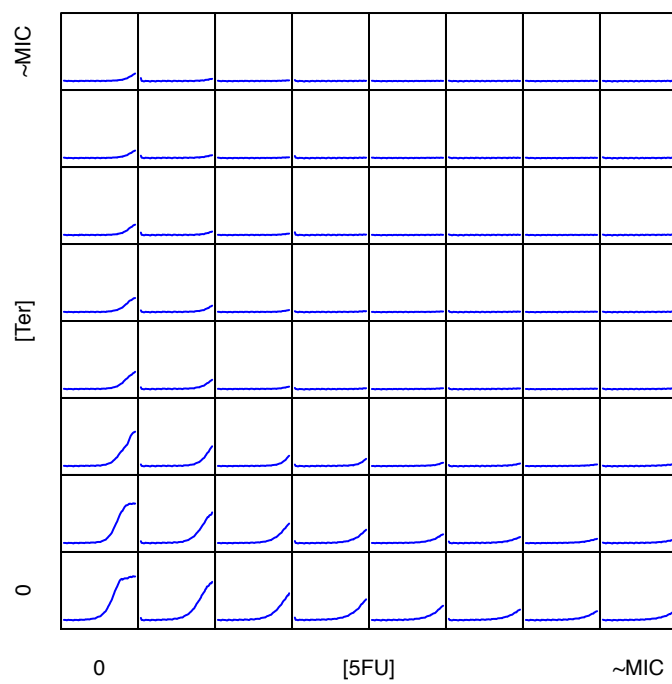

$\alpha = 1.277640$

viii

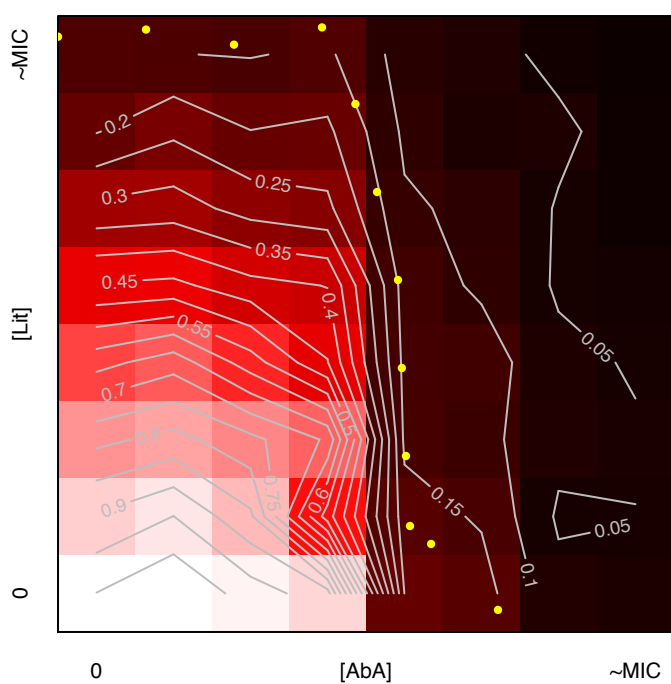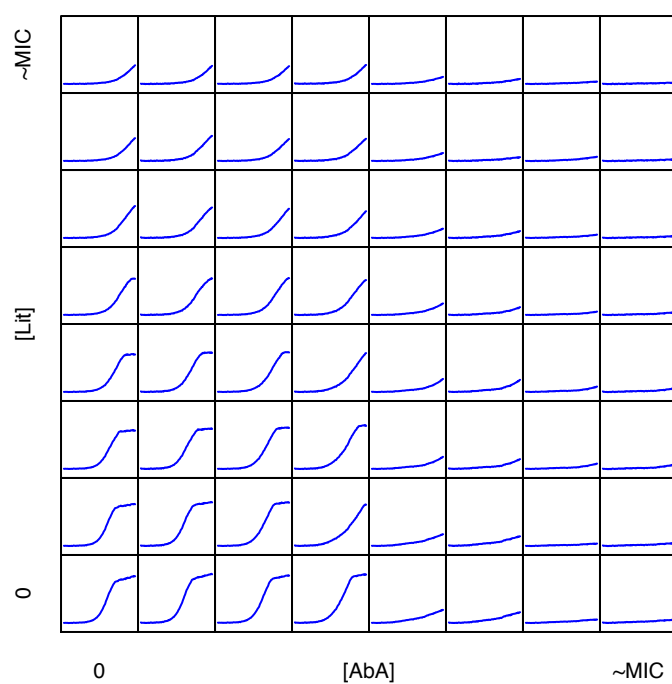

$\alpha = -1.030177$

ix

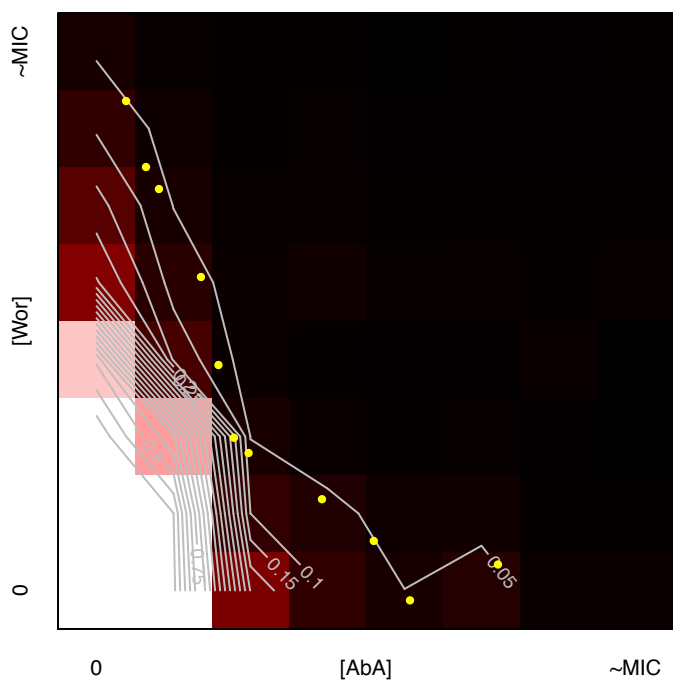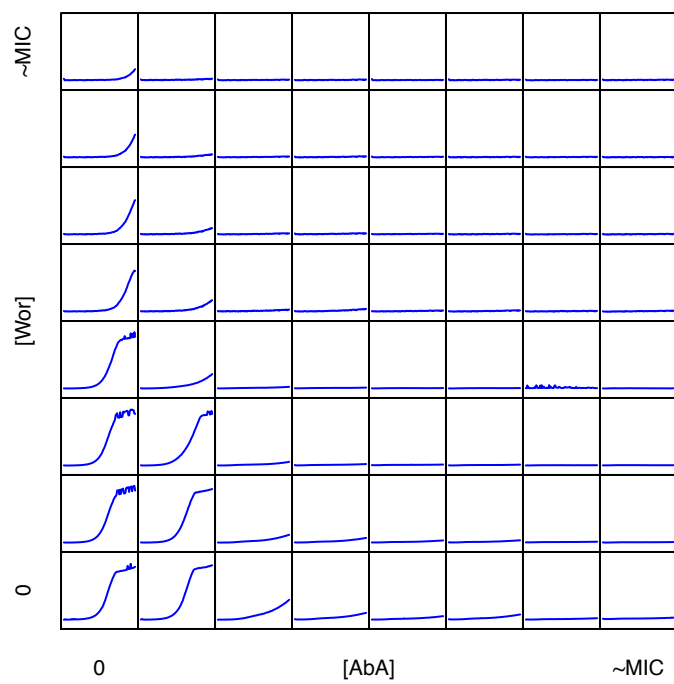

$\alpha = 0.9248558$

x

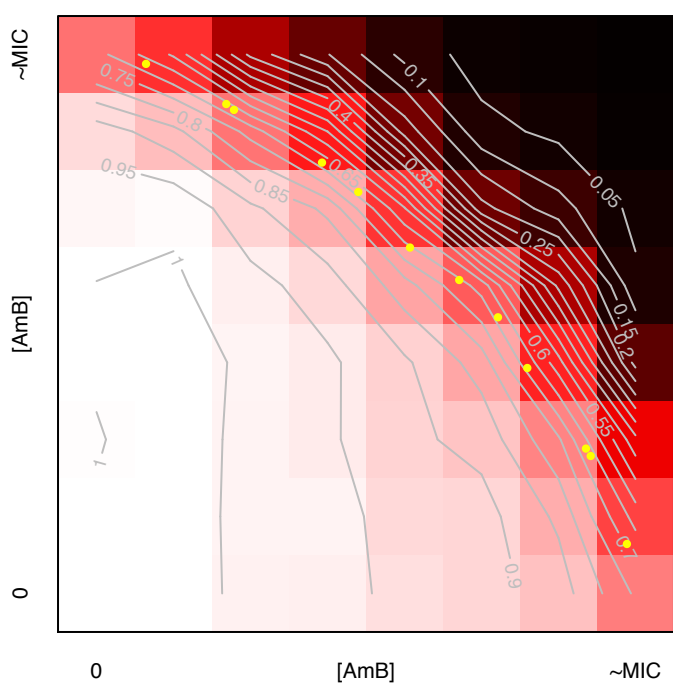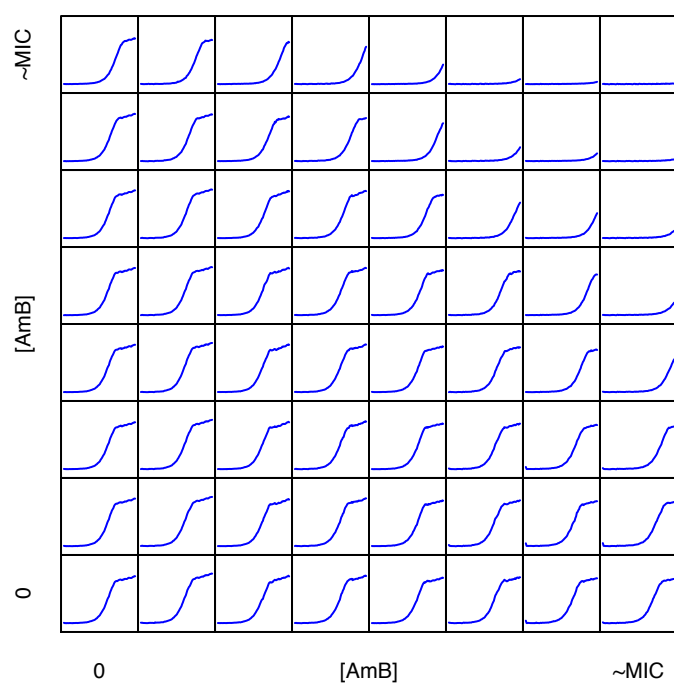

$\alpha = 3.532009$

xi

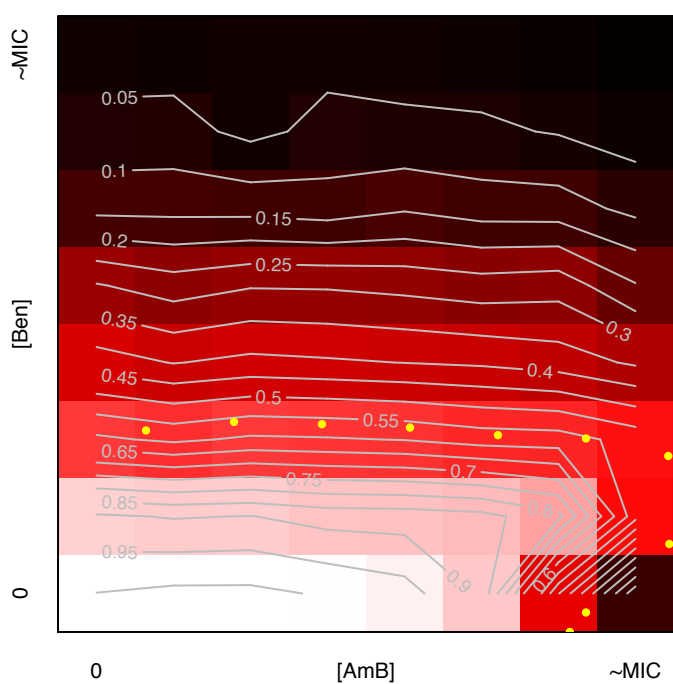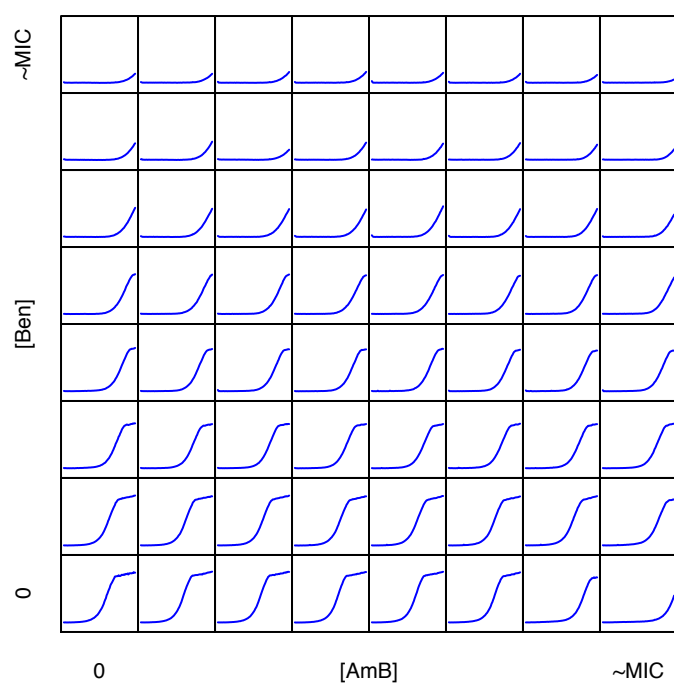

$\alpha = 0.9249675$

xii

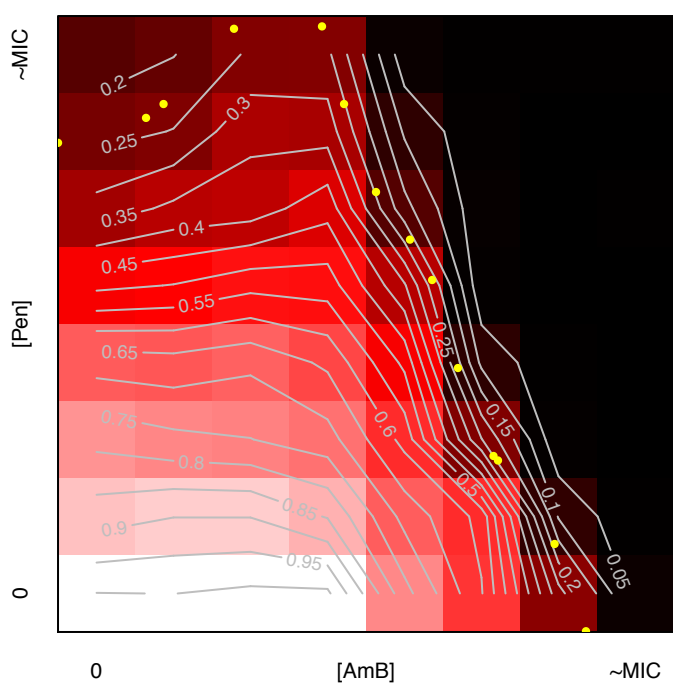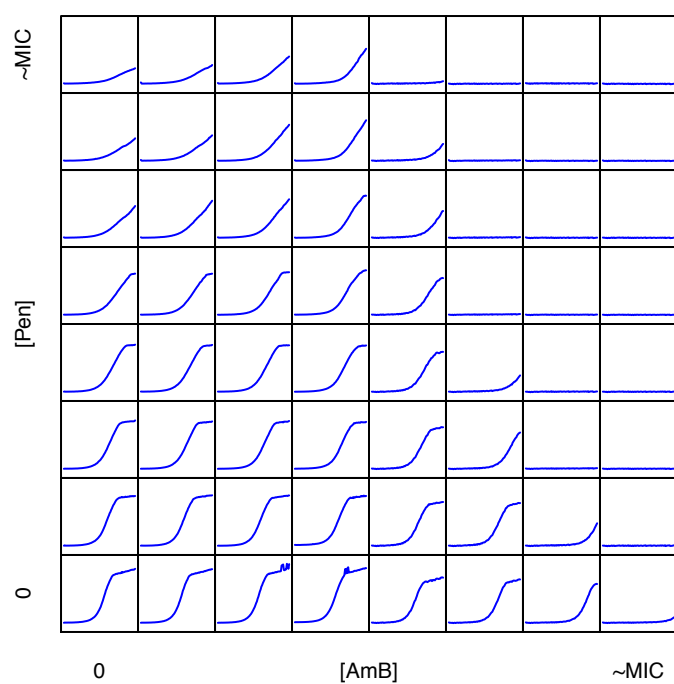

$\alpha = 2.923044$

xiii

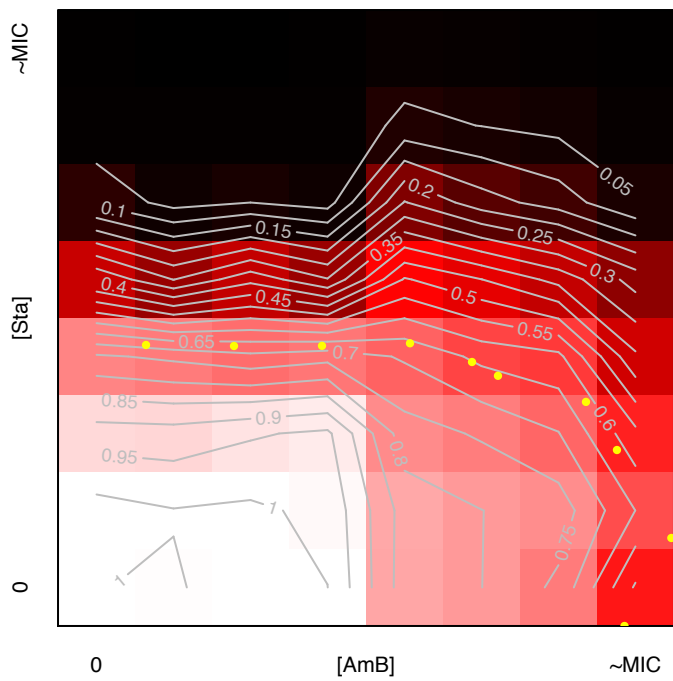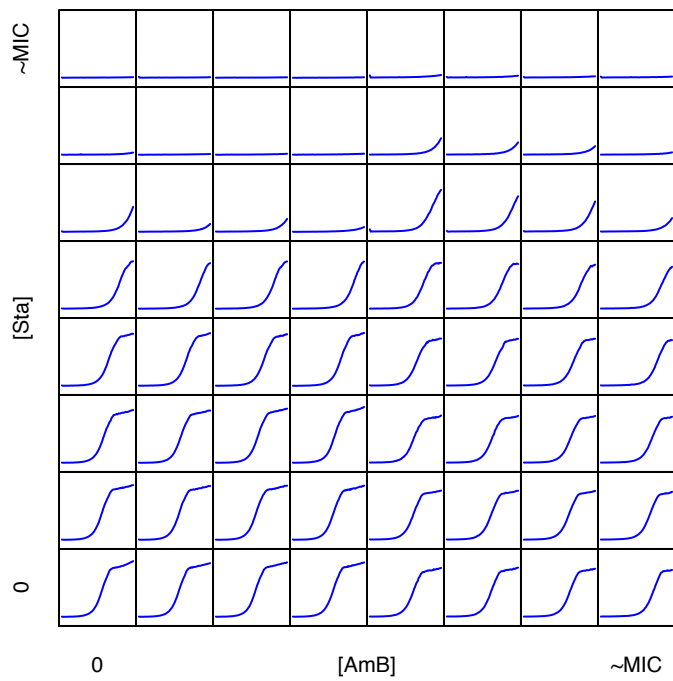

$\alpha = 0.7041237$

xiv

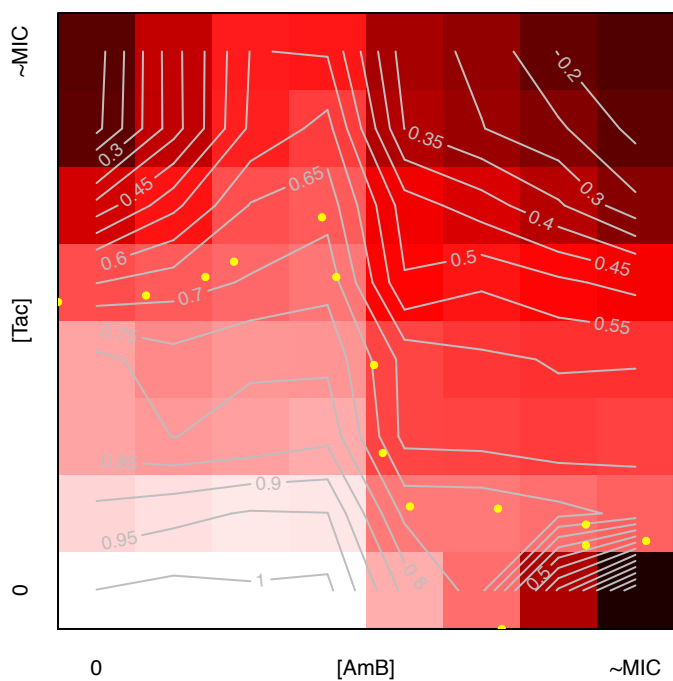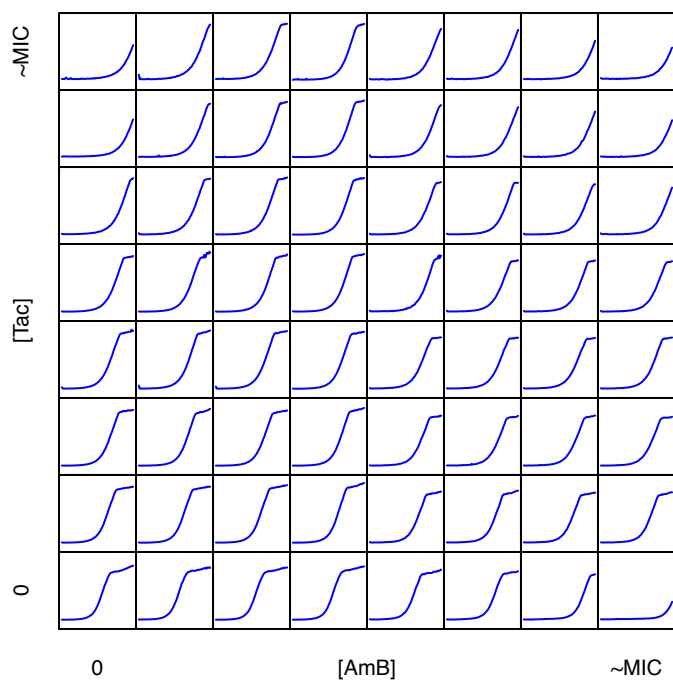

$\alpha = 0.2782055$

xv

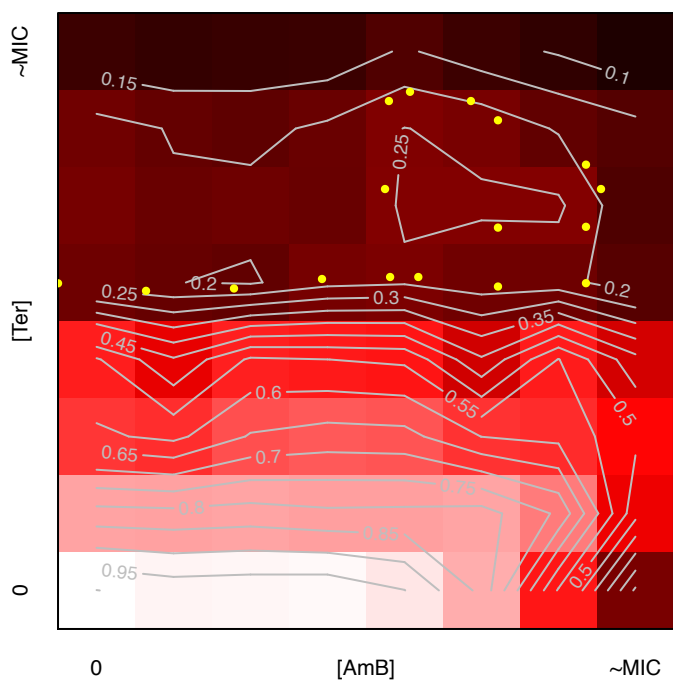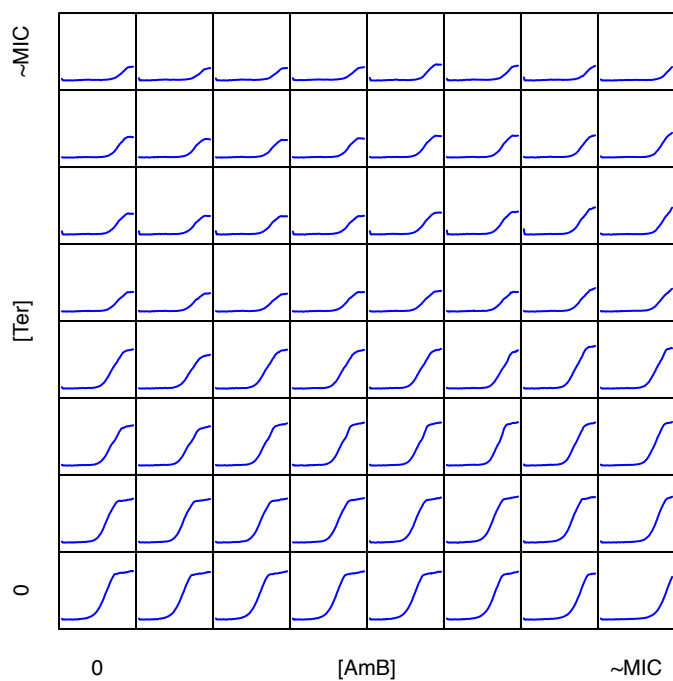

$\alpha = -0.1286633$

xvi

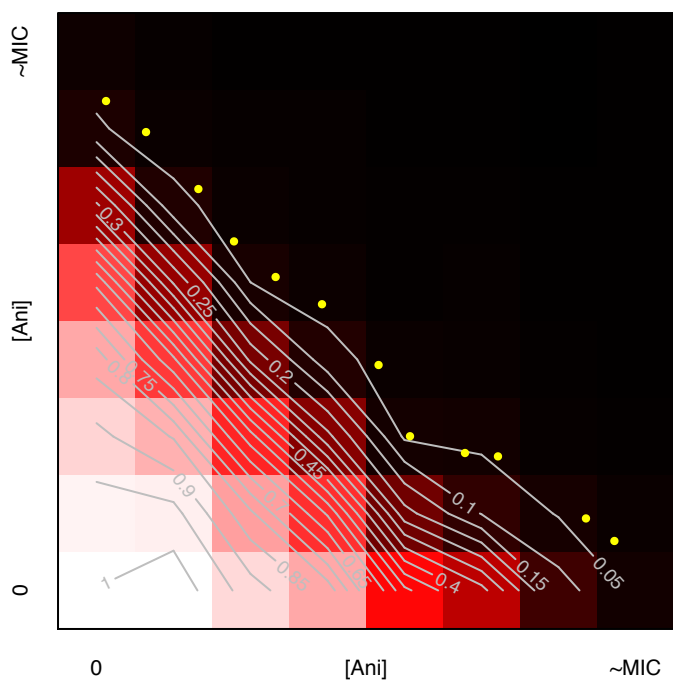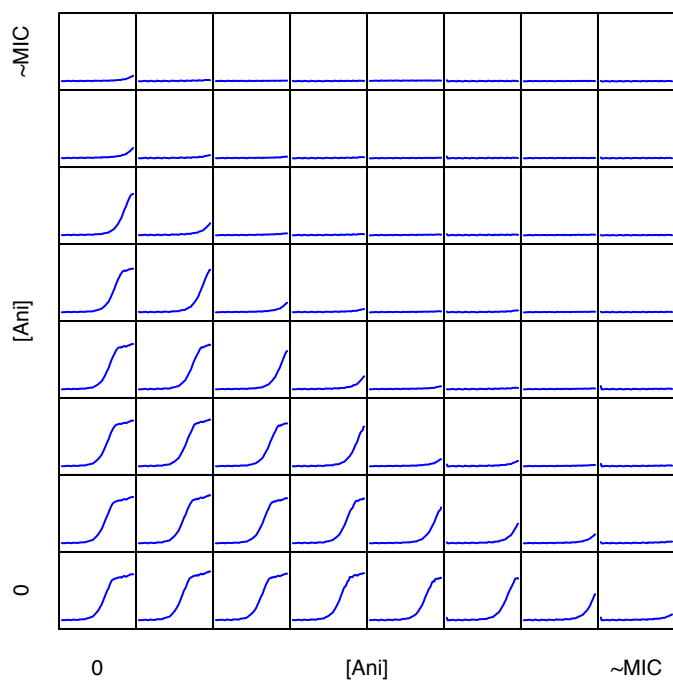

xvii

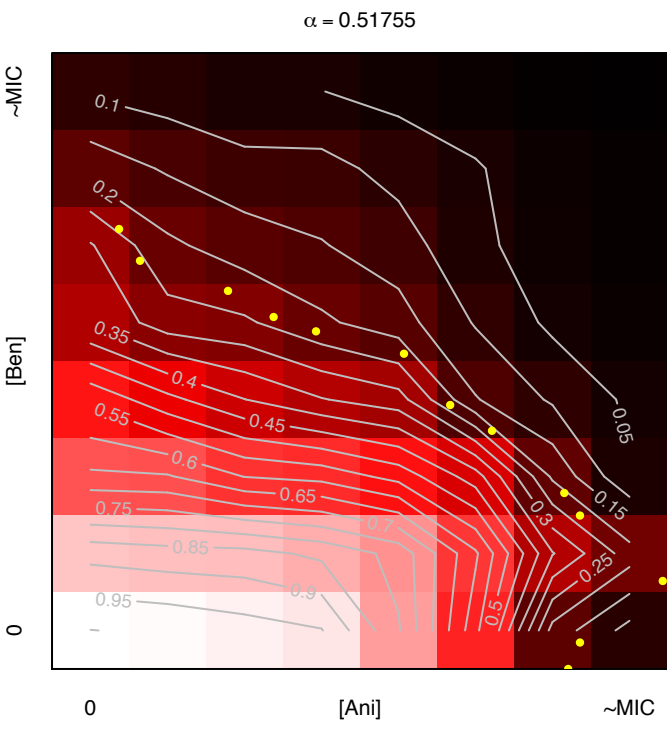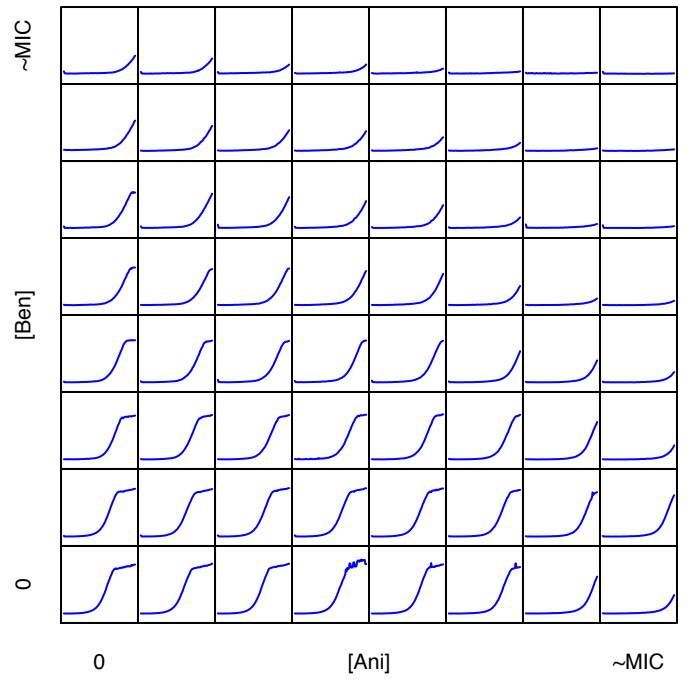

xviii

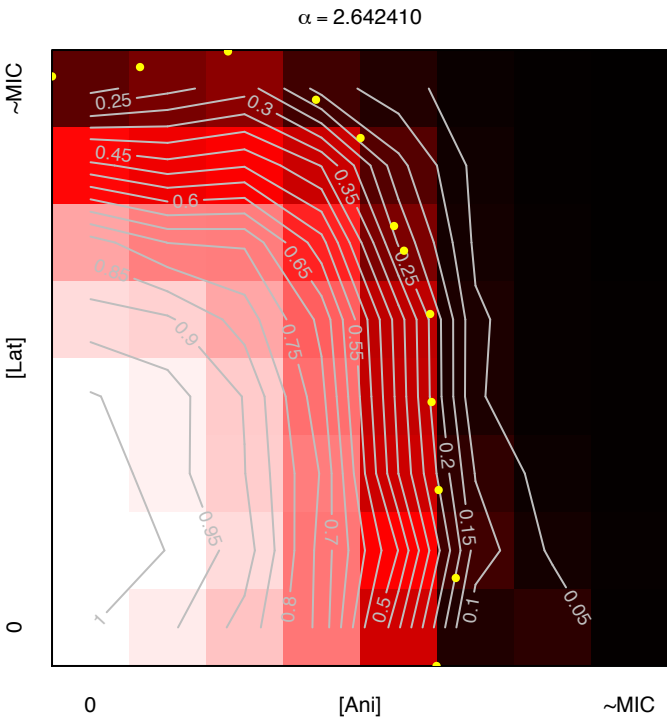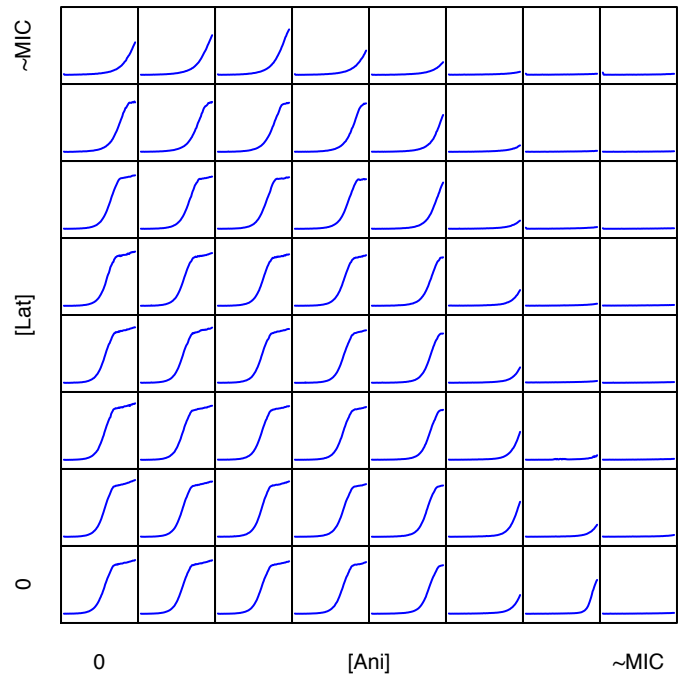

xix

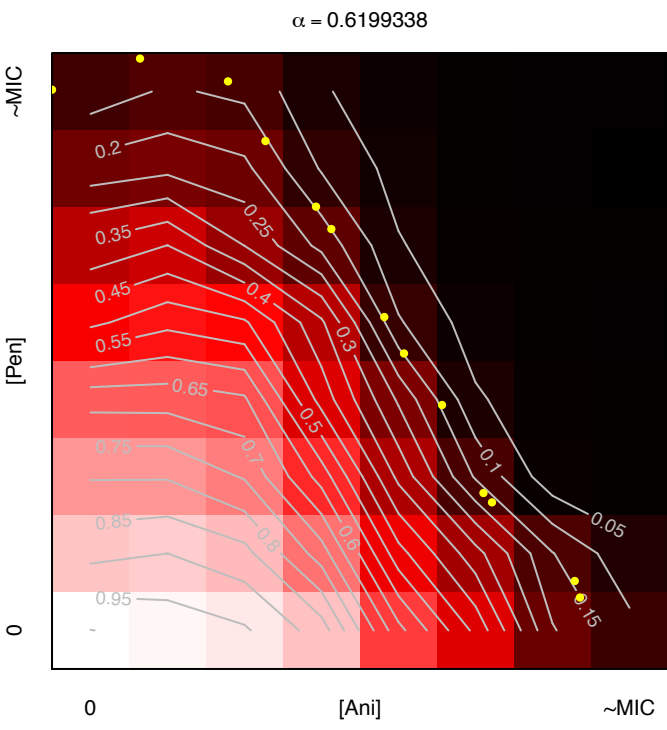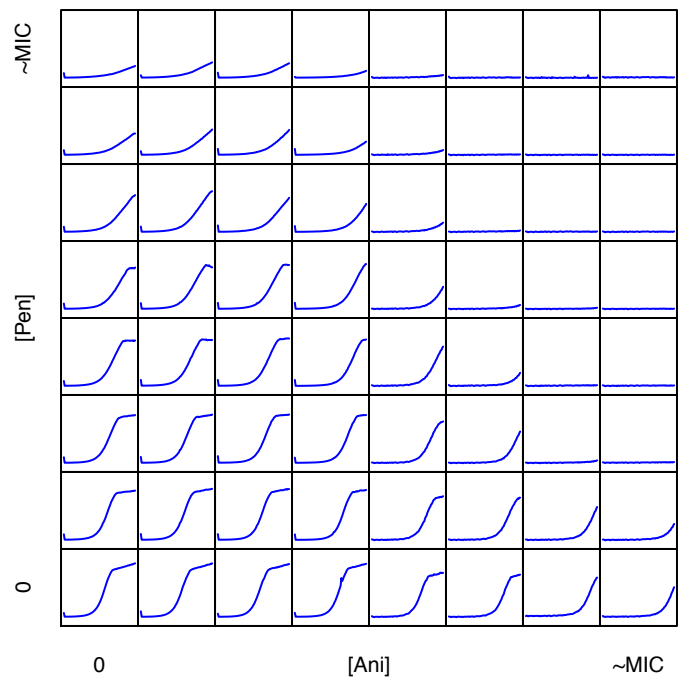

xx

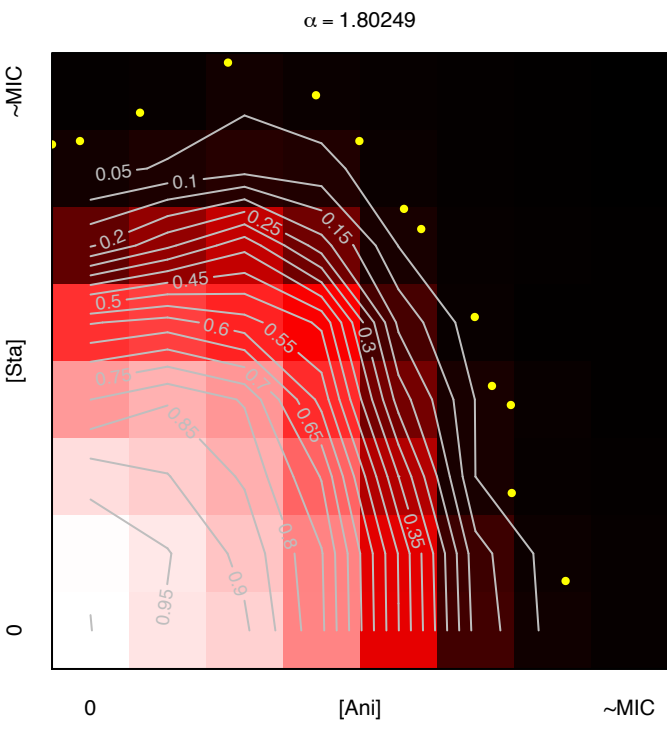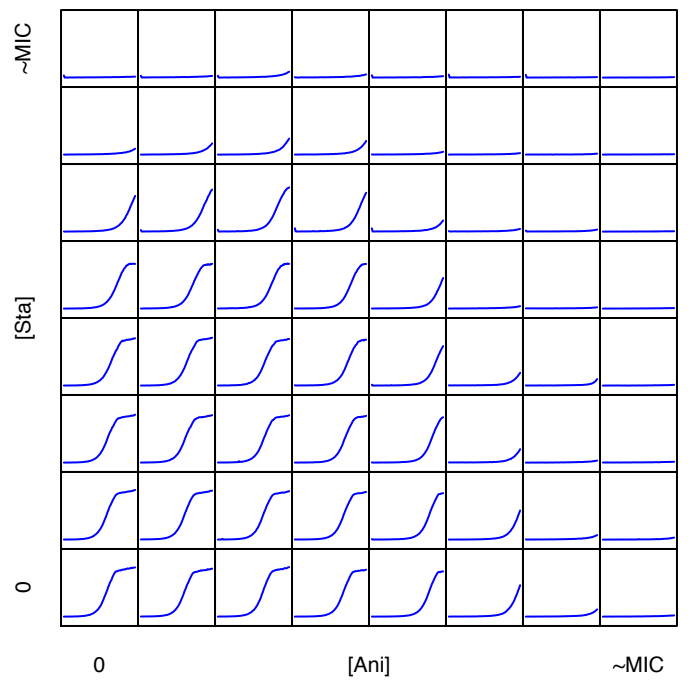

$\alpha = -2.293919$

xxi

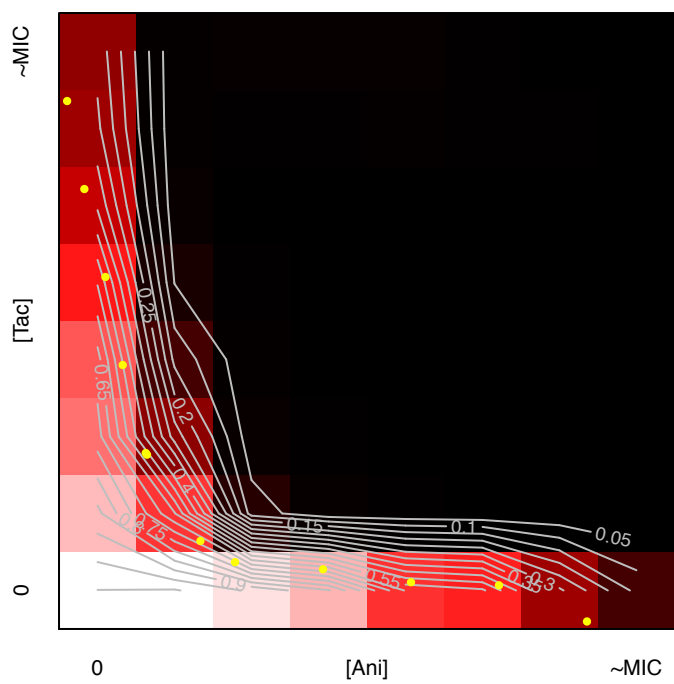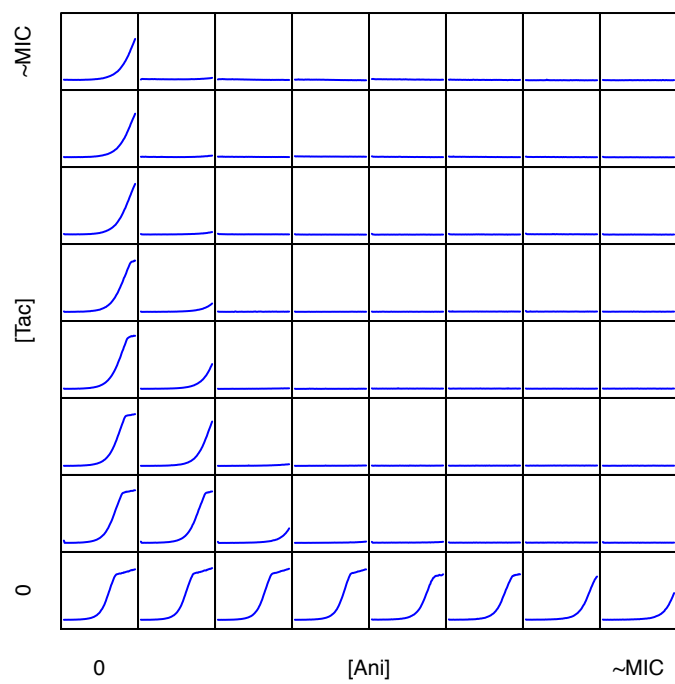

$\alpha = -1.012863$

xxii

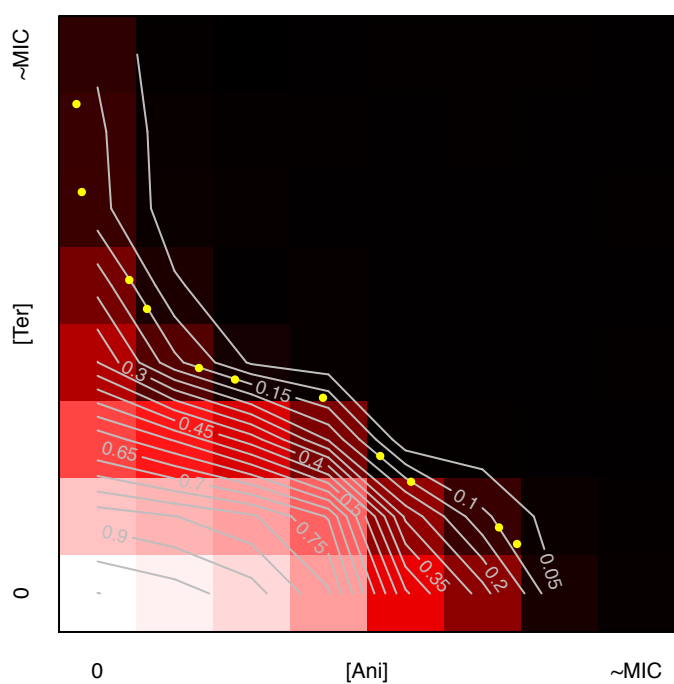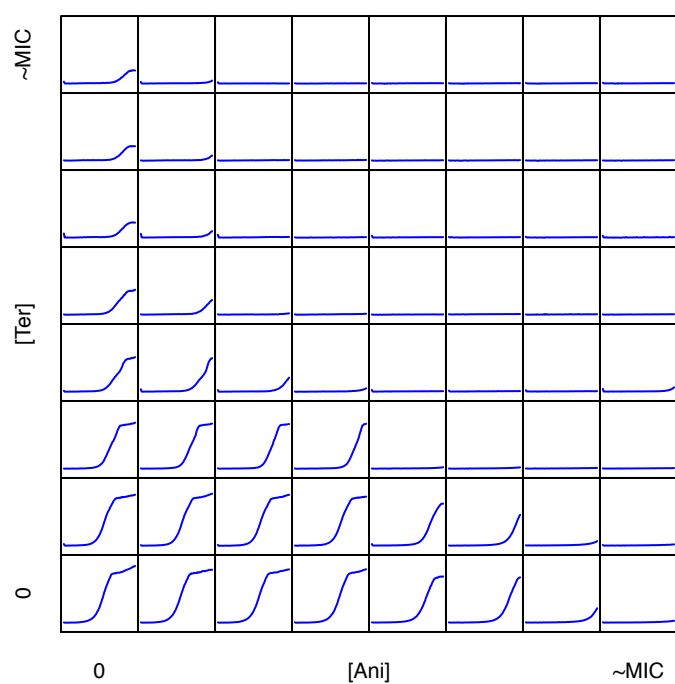

$\alpha = 0.07316906$

xxiii

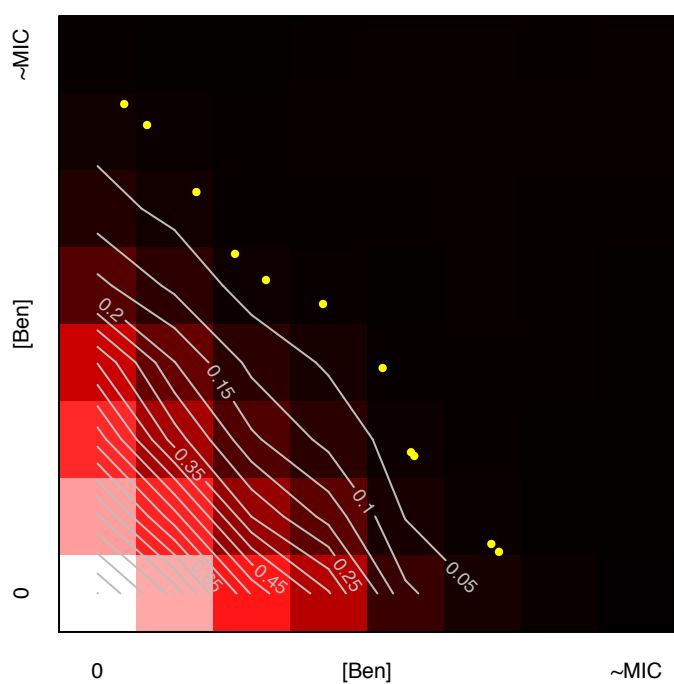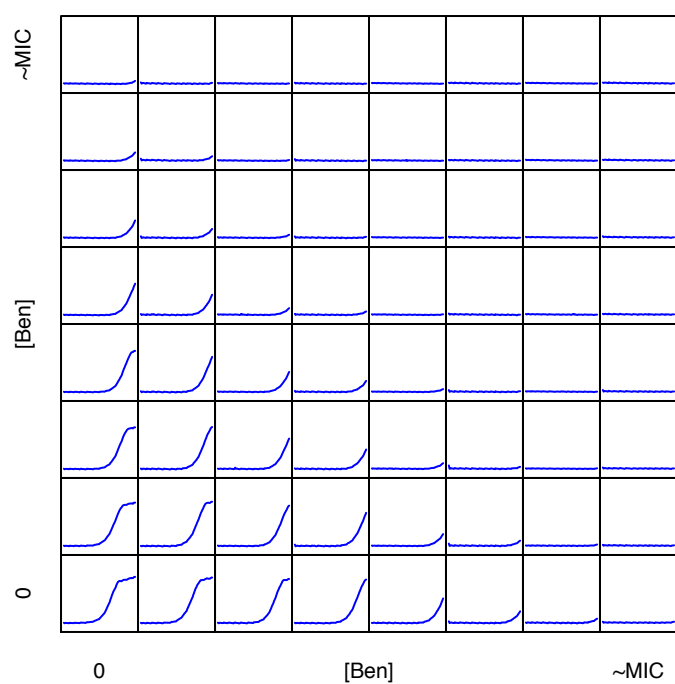

$\alpha = 1.563210$

xxiv

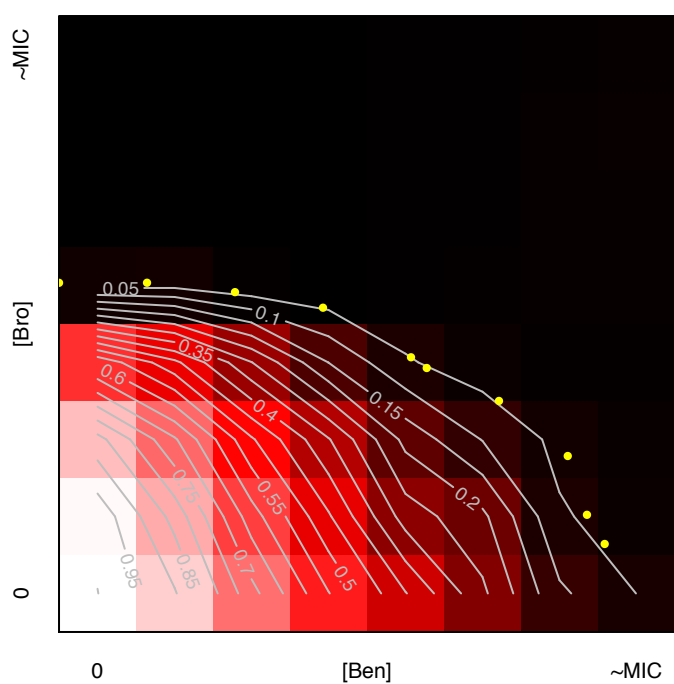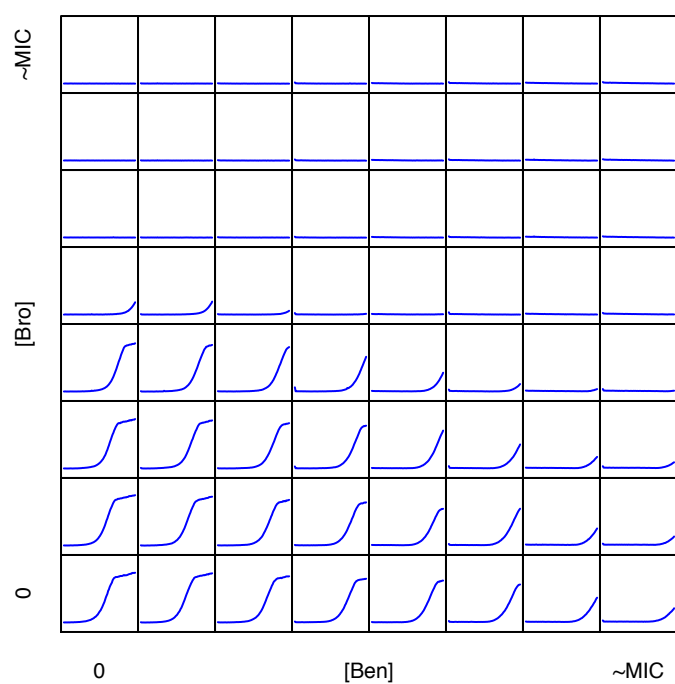

$\alpha = -1.020329$

XXV

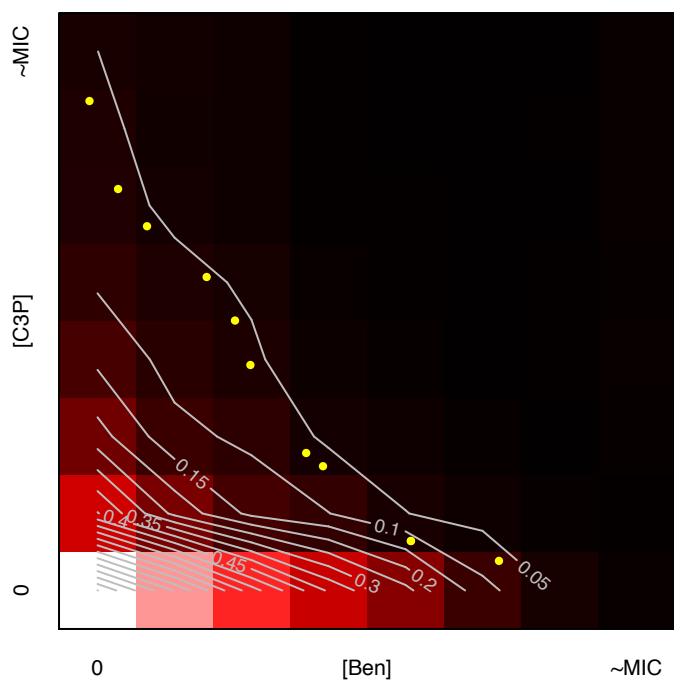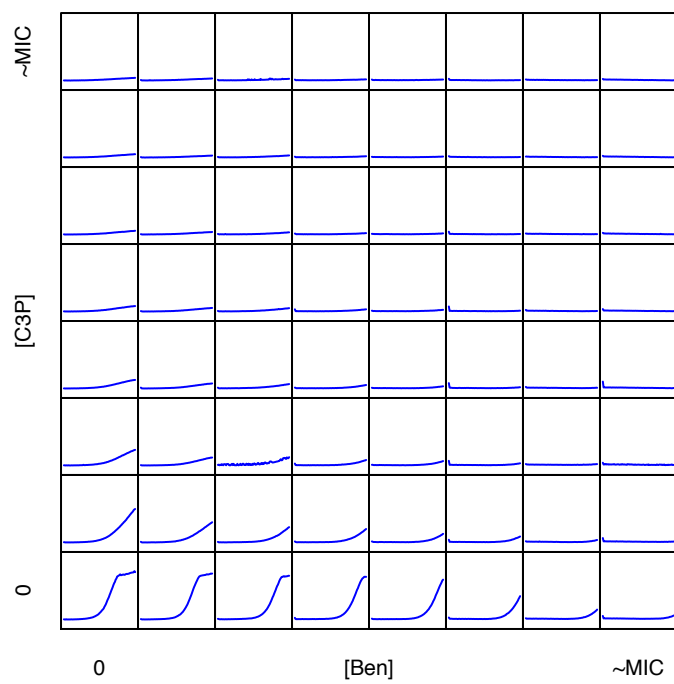

$\alpha = 1.337176$

XXVI

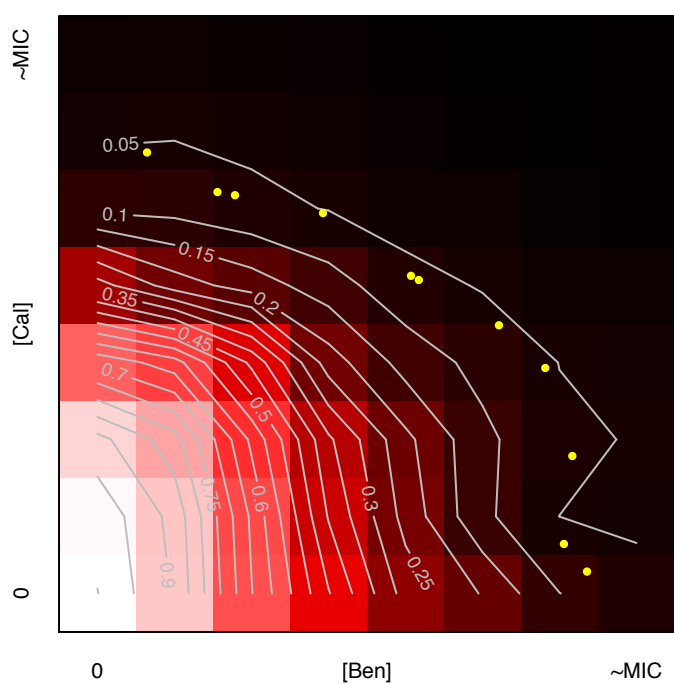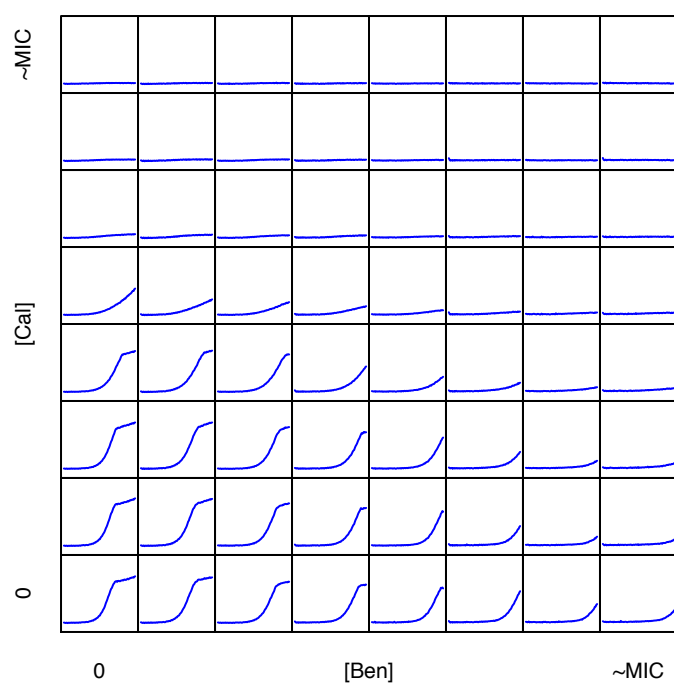

$\alpha = 0.6526255$

XXVII

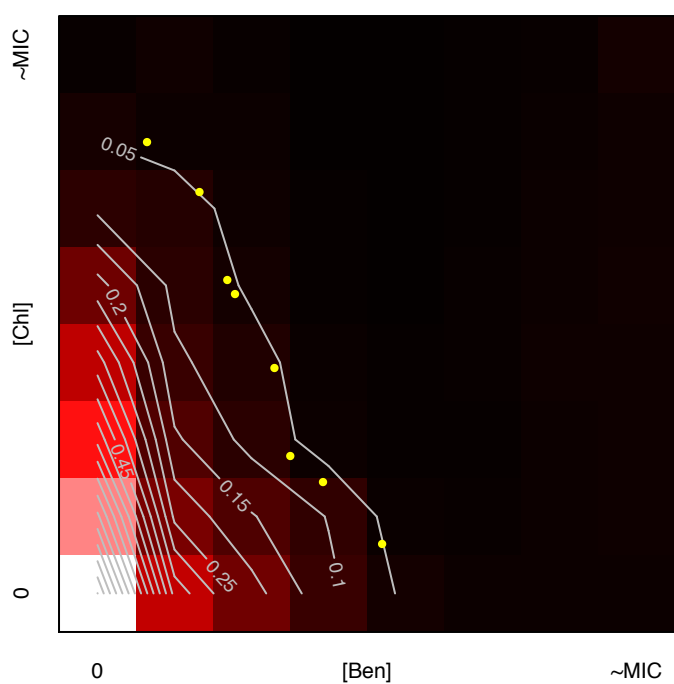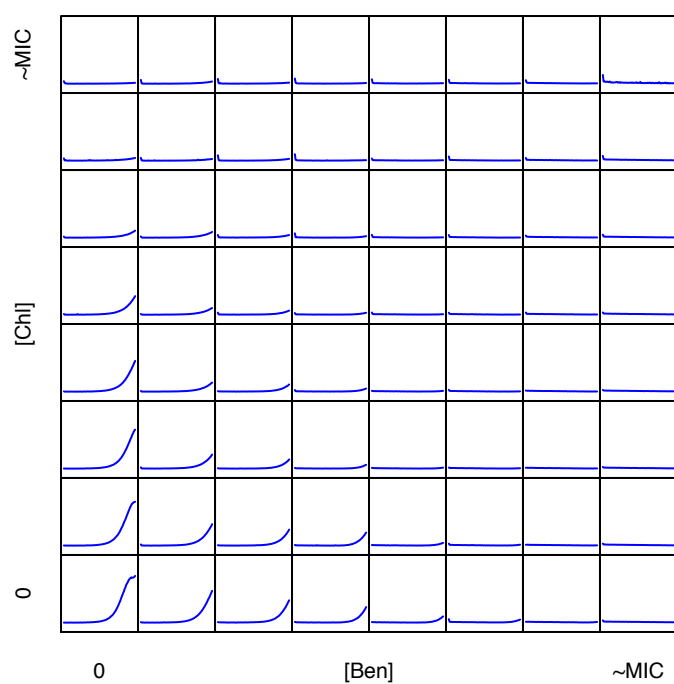

$\alpha = 0.8604572$

XXVIII

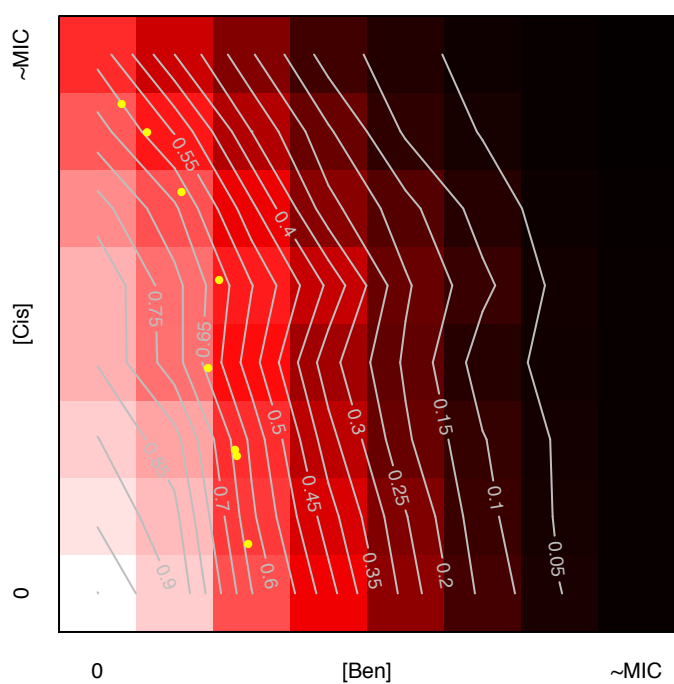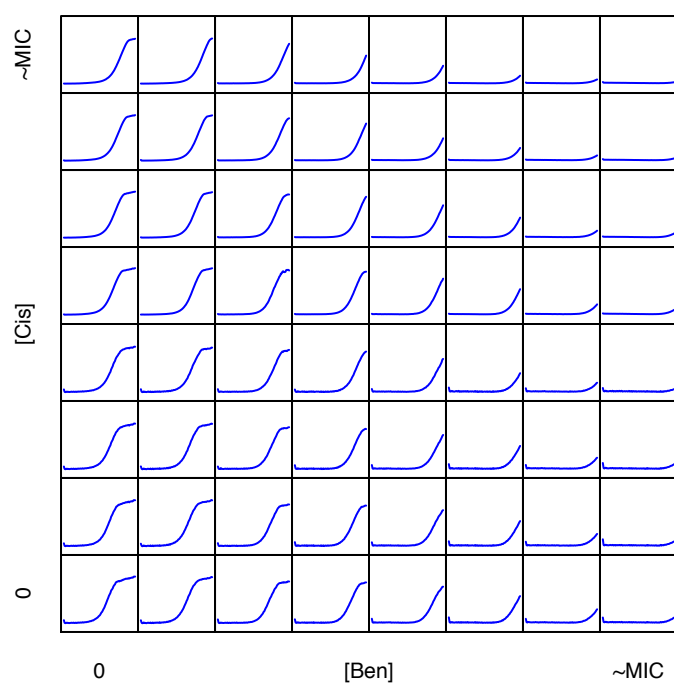

$\alpha = 0.2228909$

xxix

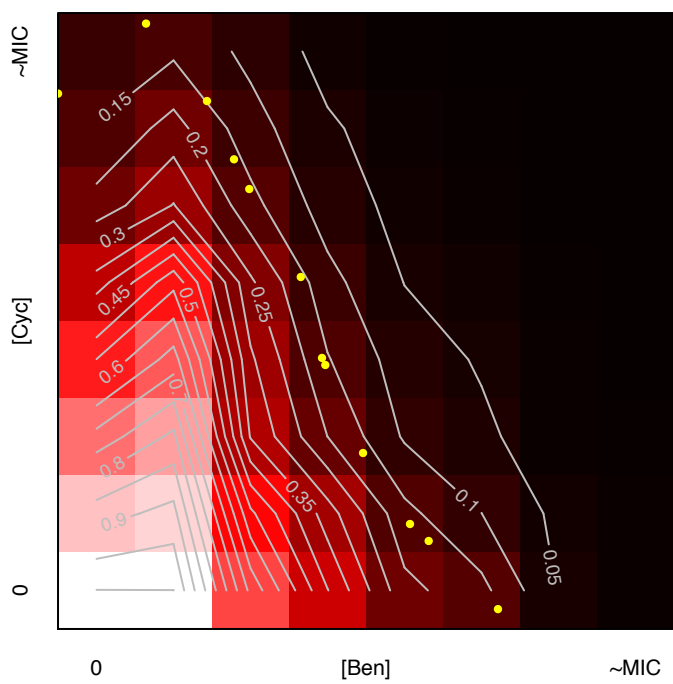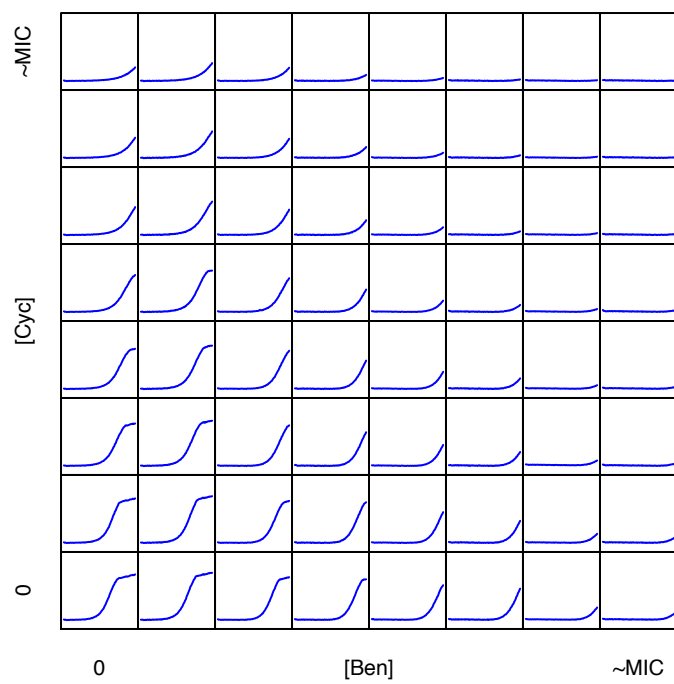

$\alpha = 0.9857071$

xxx

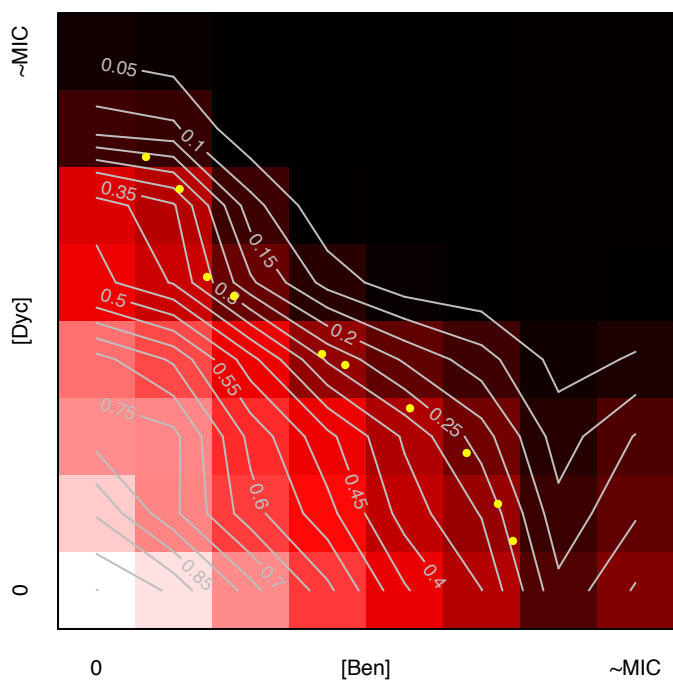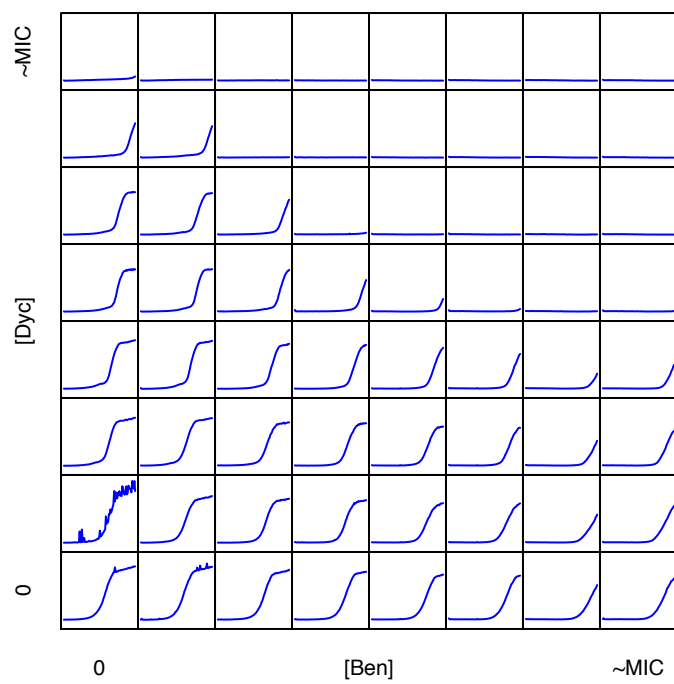

$\alpha = 0.4106914$

xxxii

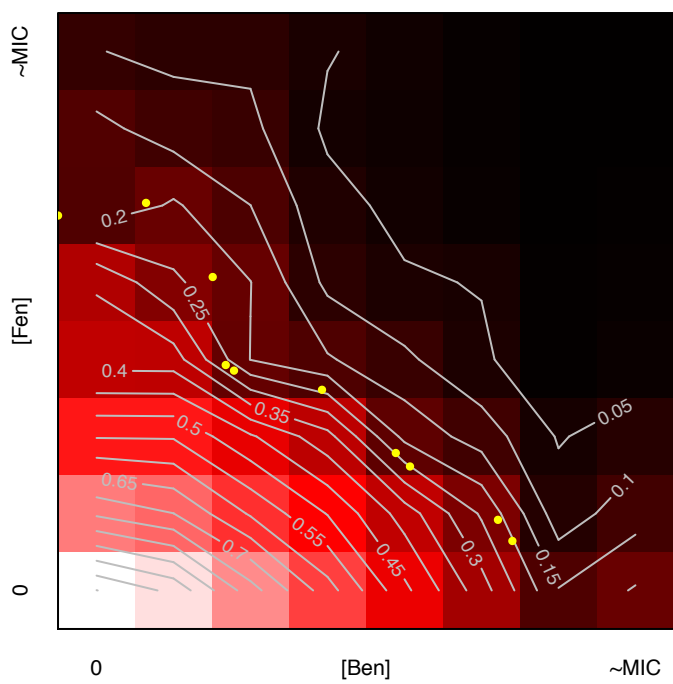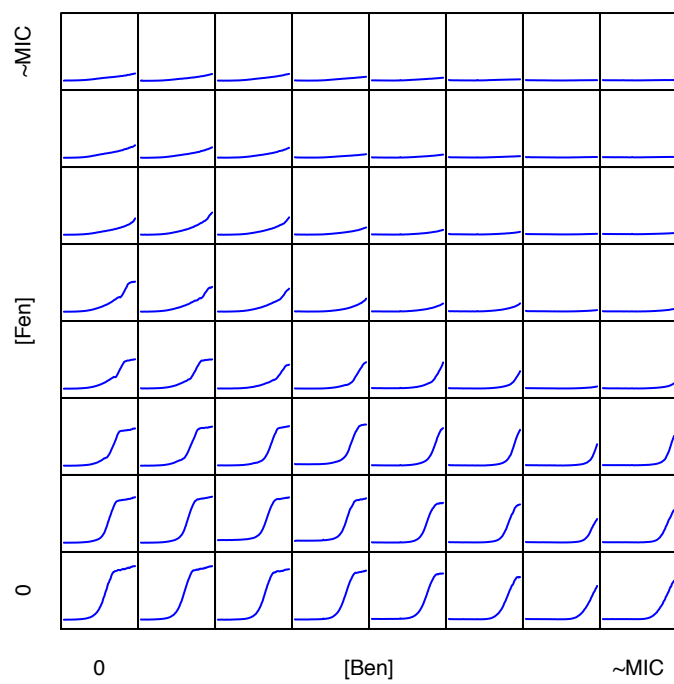

$\alpha = 0.5347631$

xxxiii

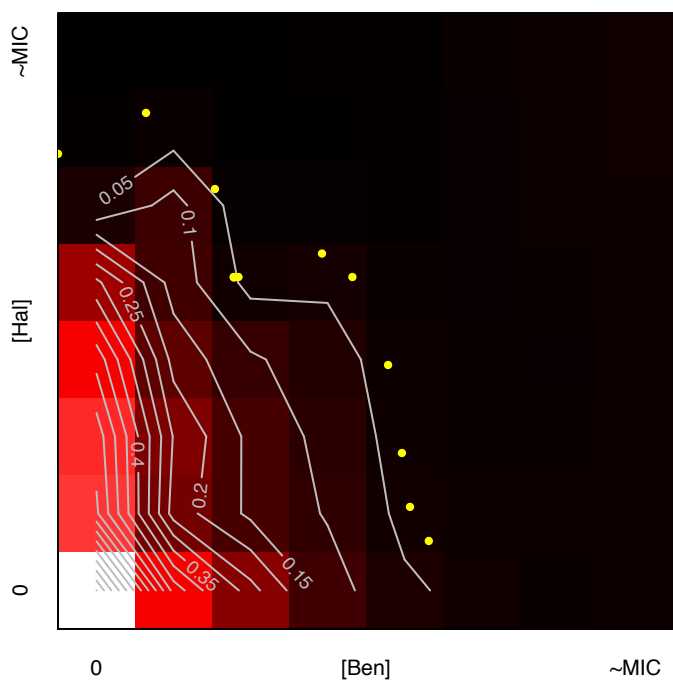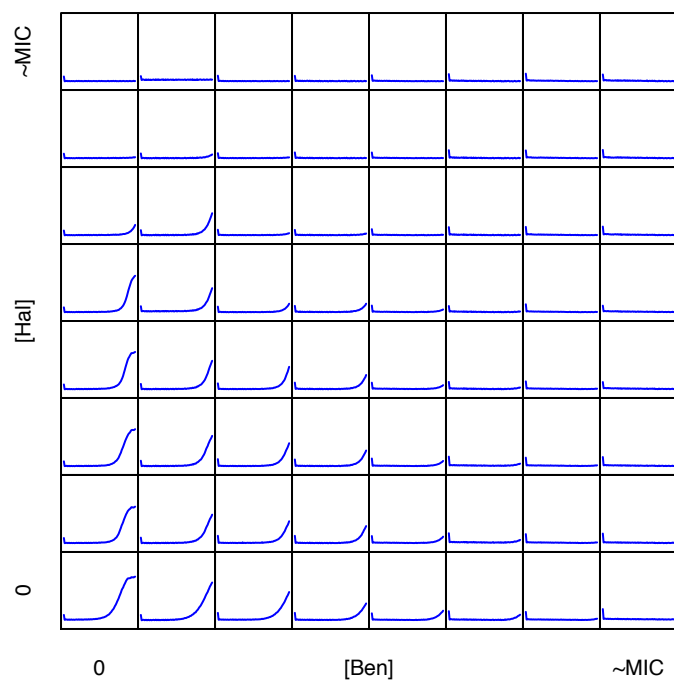



$\alpha = 1.325677$

xxxiii

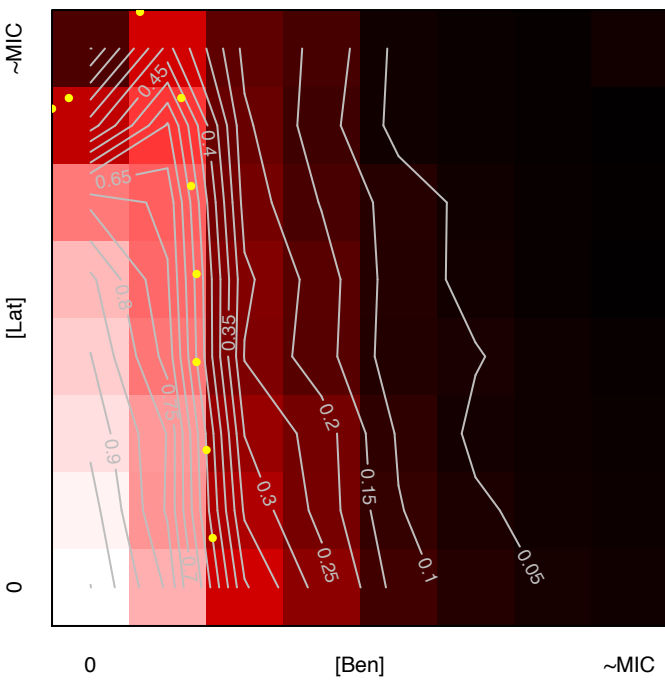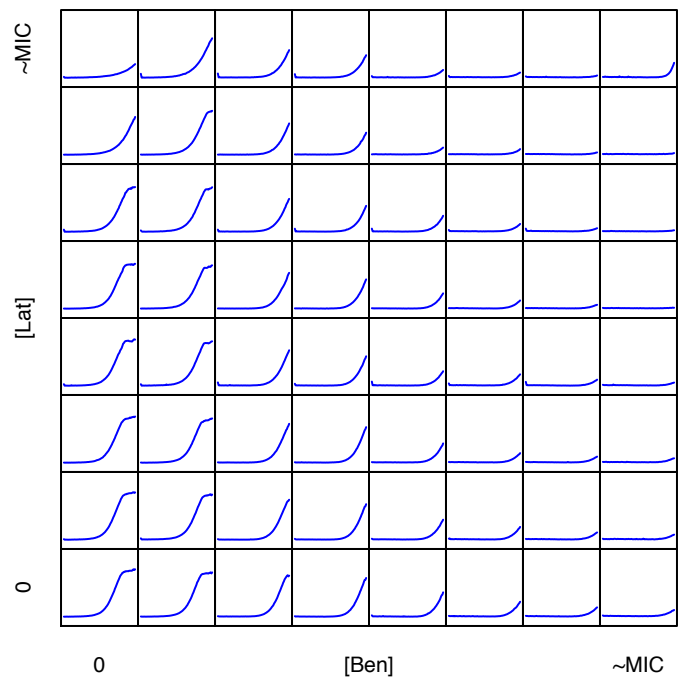

$\alpha = 0.4210233$

xxxiv

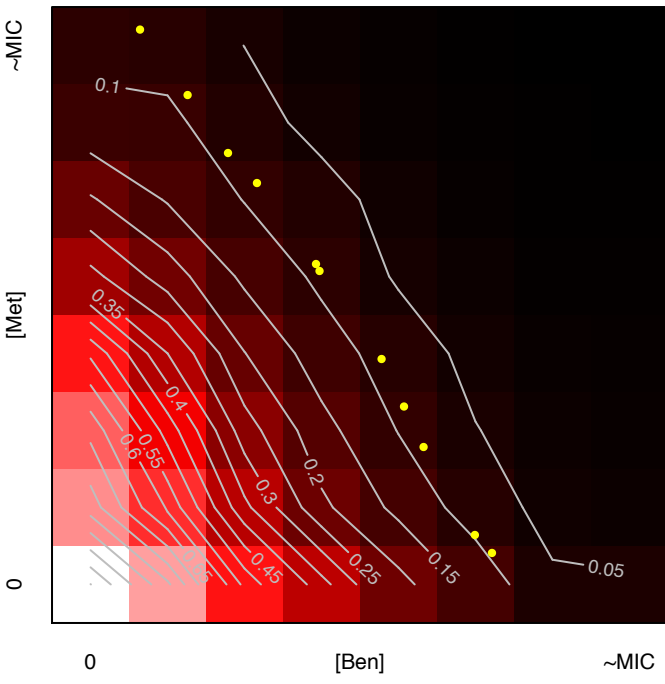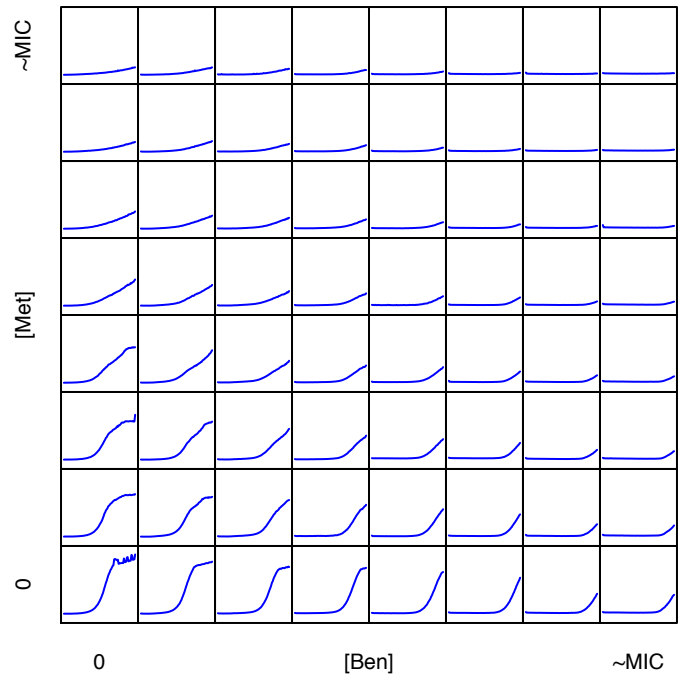

$\alpha = 0.9515345$

xxxv

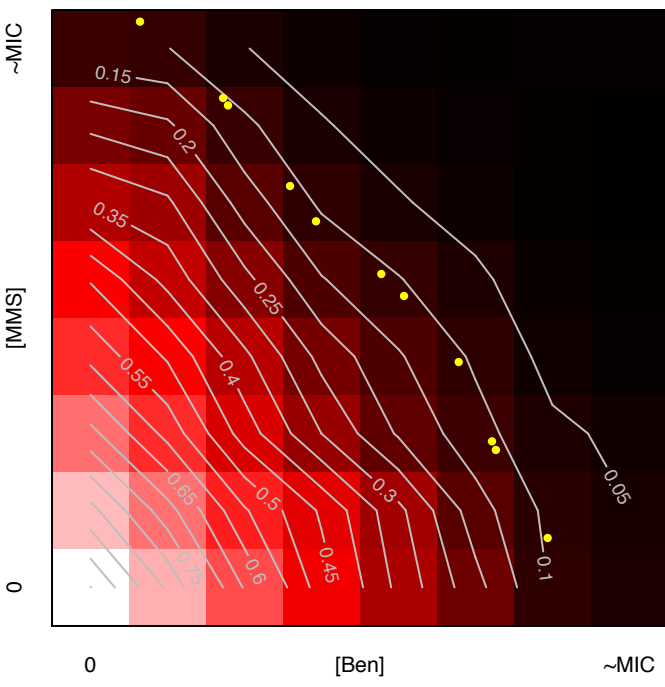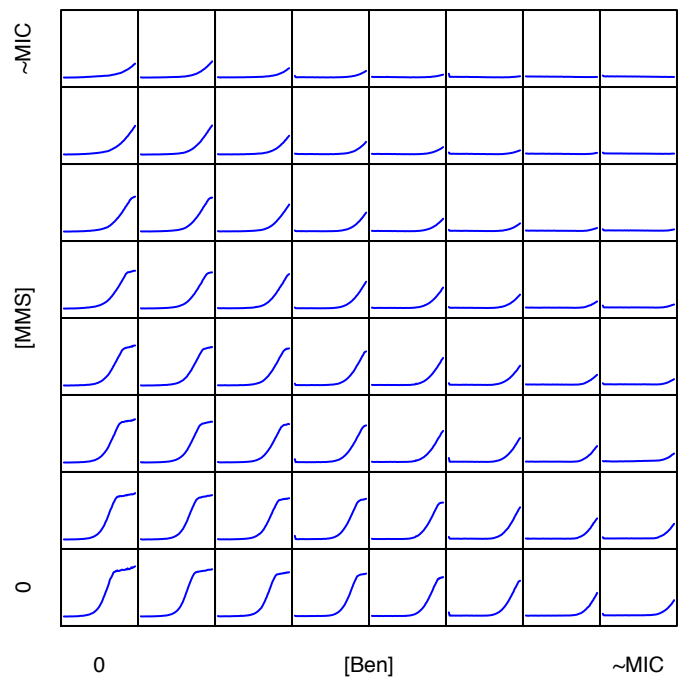

$\alpha = 0.7317014$

xxxvi

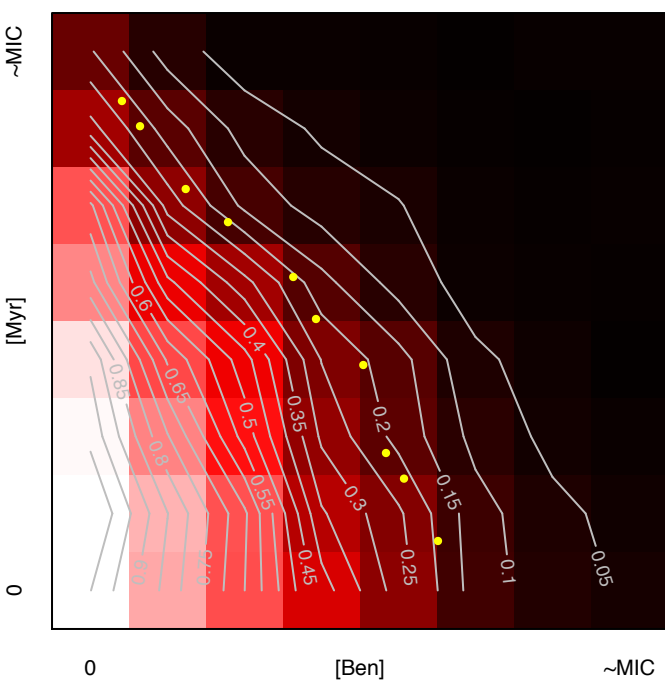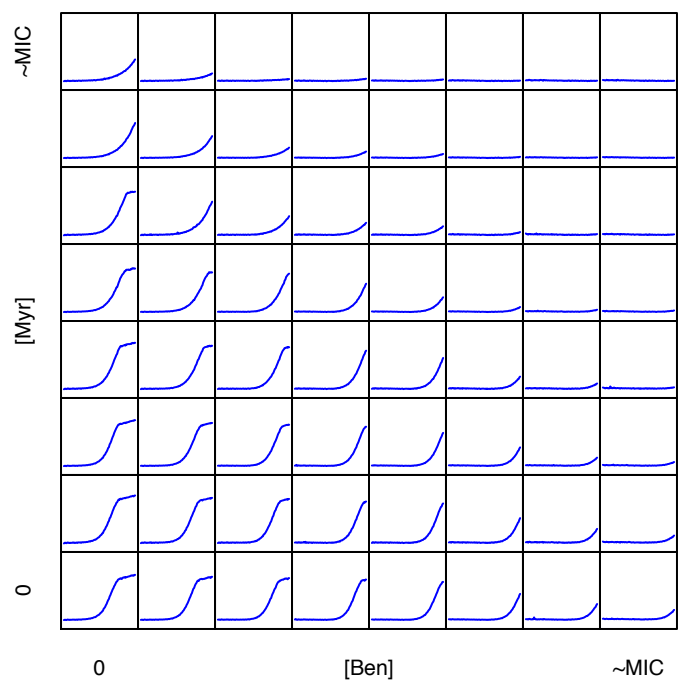

$\alpha = -1.273177$

xxxvii

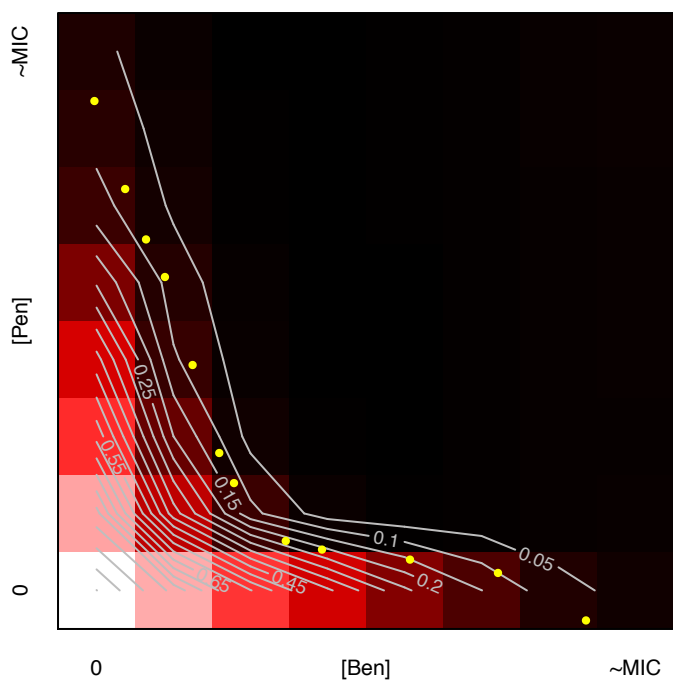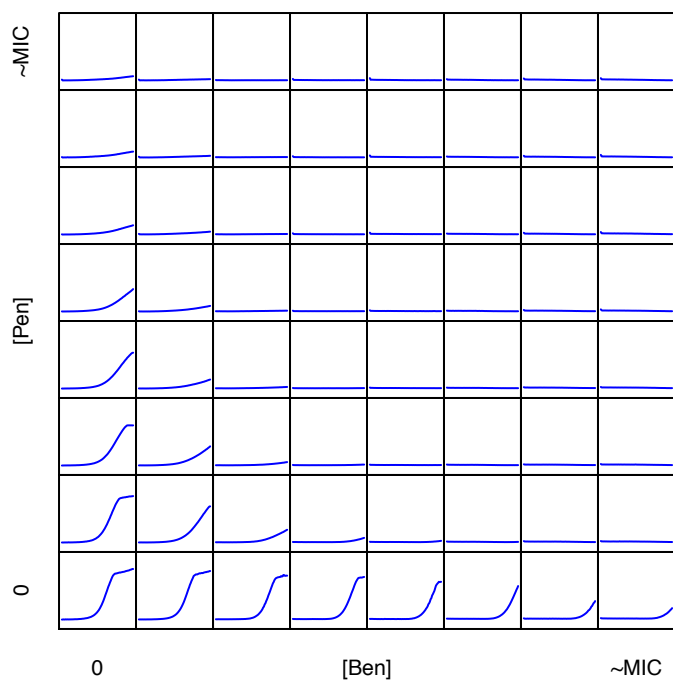

$\alpha = -1.810468$

xxxviii

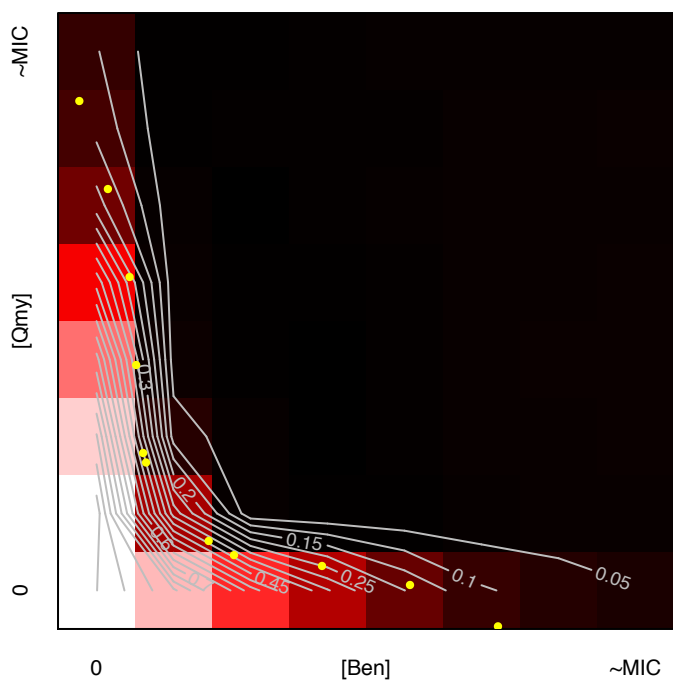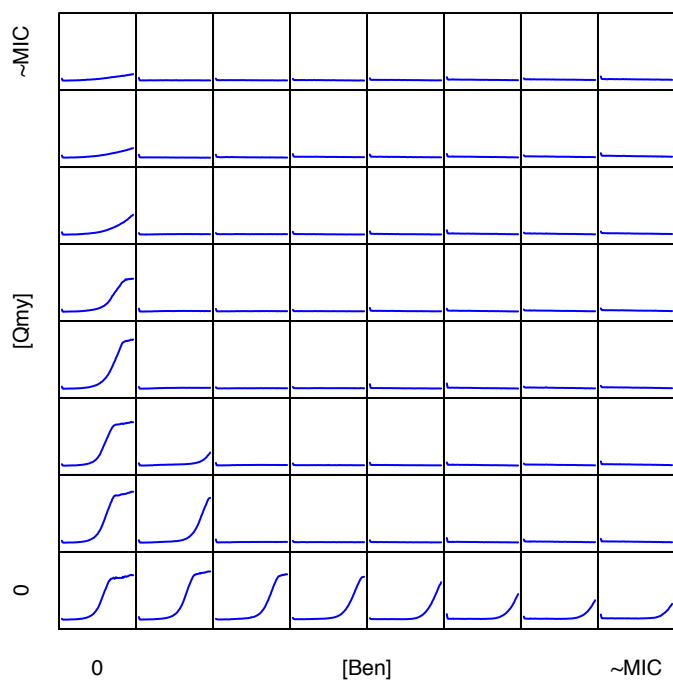

$\alpha = -0.5567437$

xxxix

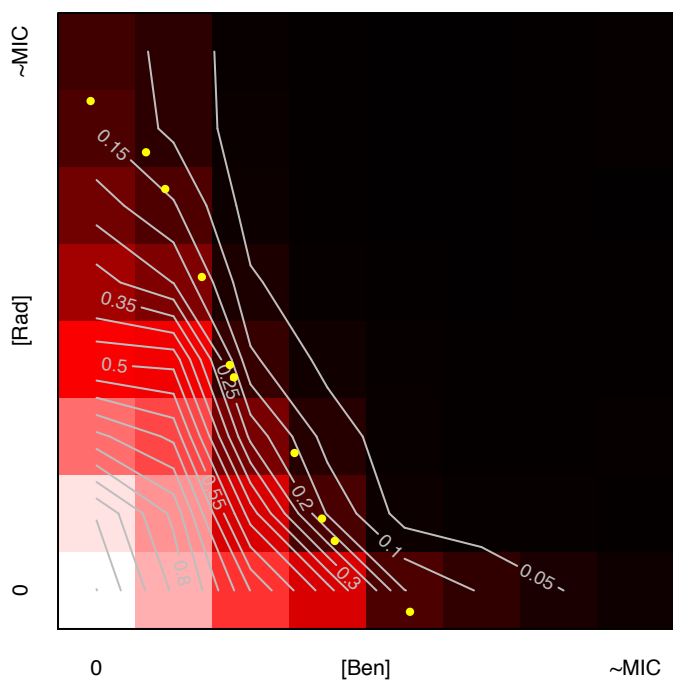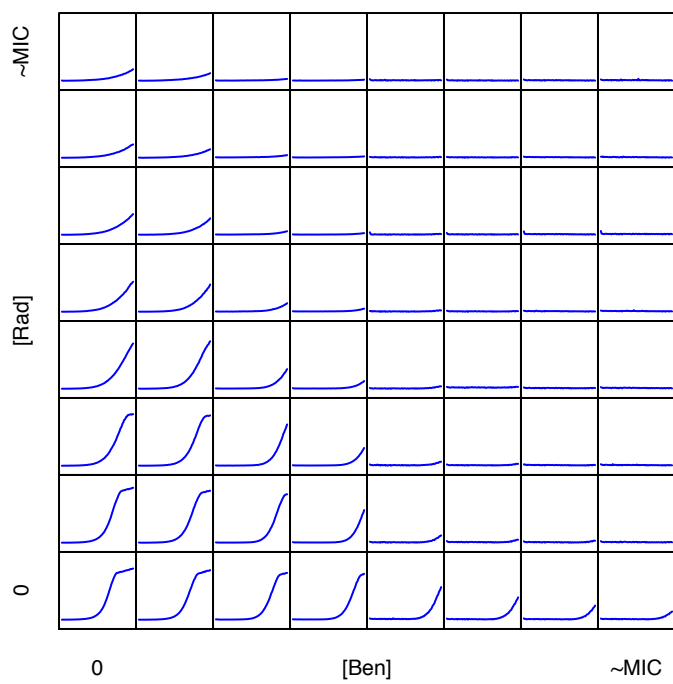

$\alpha = 0.1040503$

xl

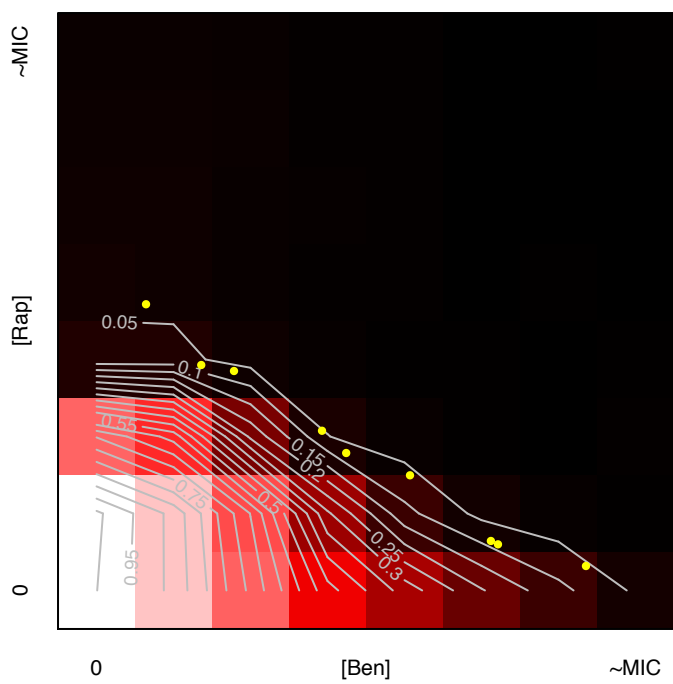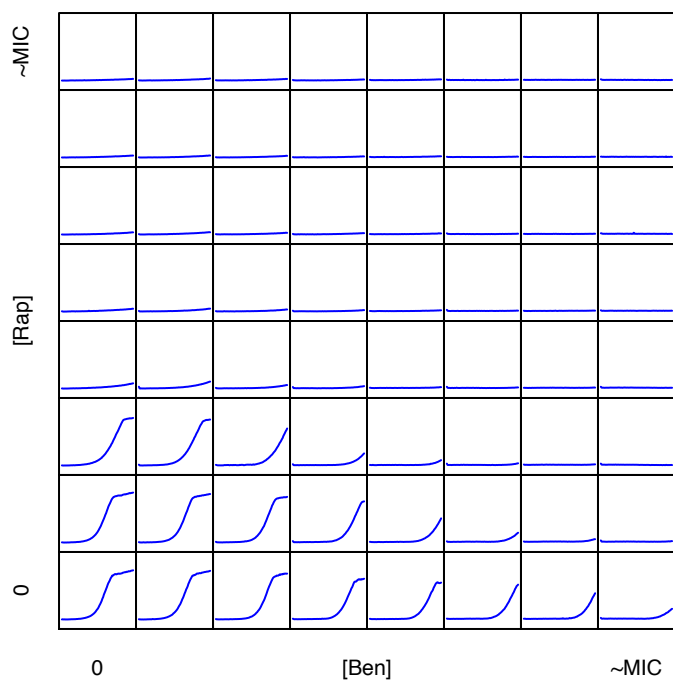

$\alpha = 0.874797$

xli

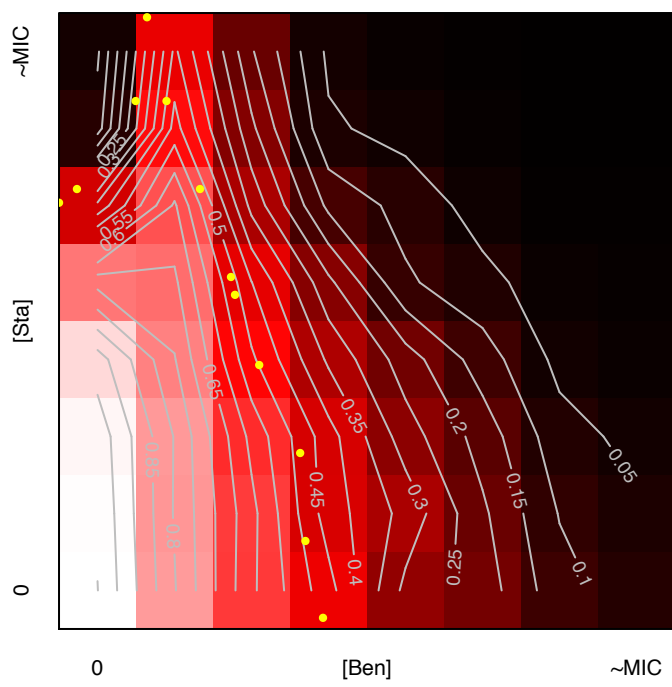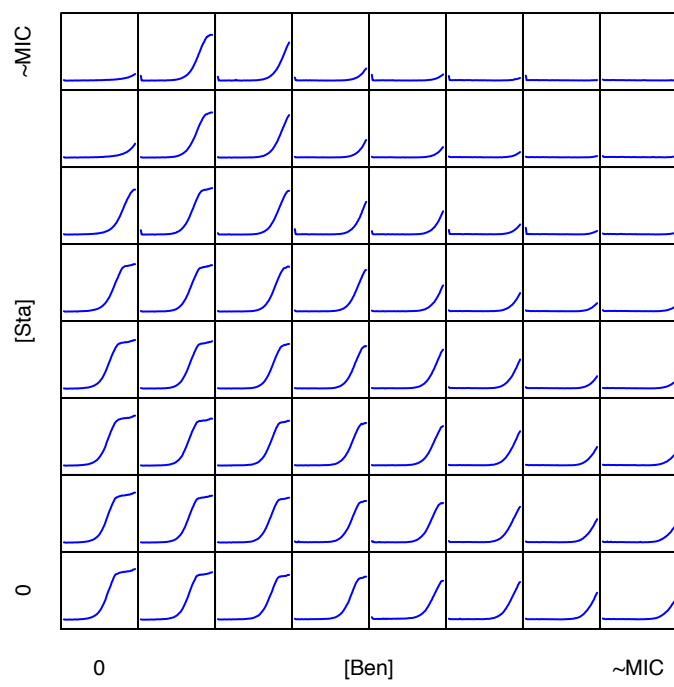

$\alpha = -2.867011$

xlii

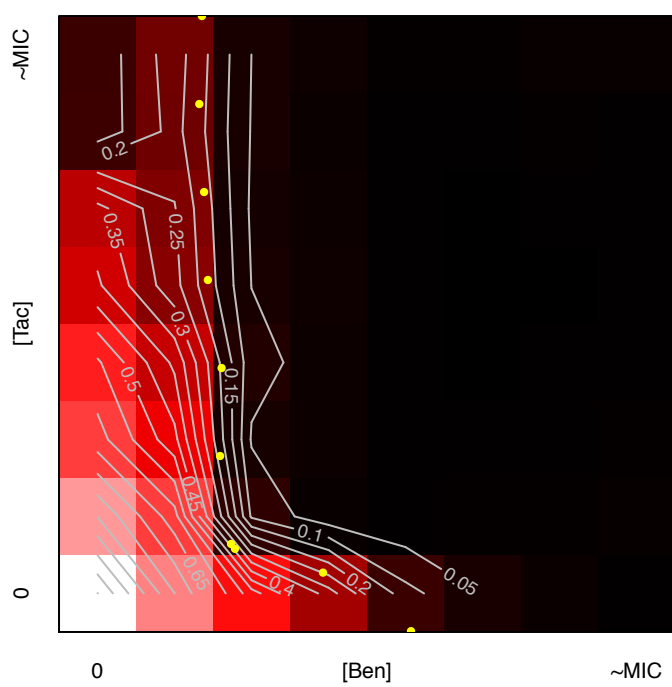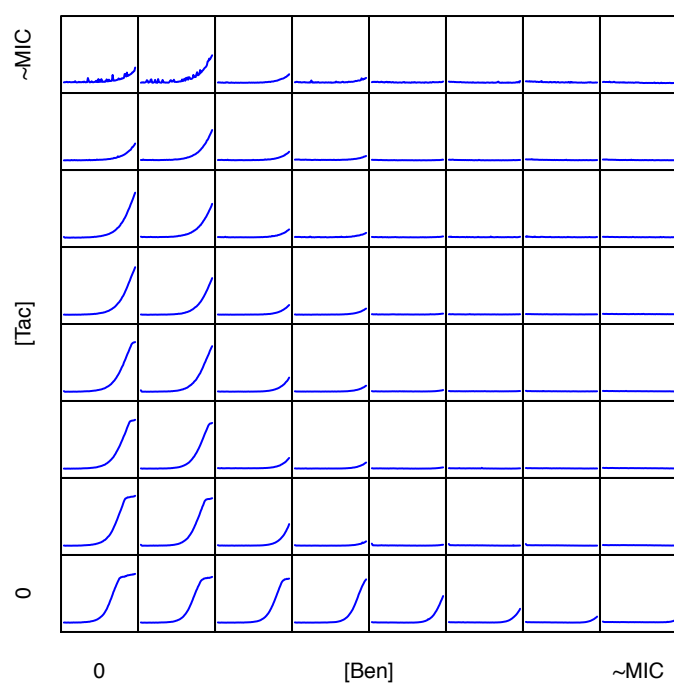

$\alpha = -0.1312014$

xliii

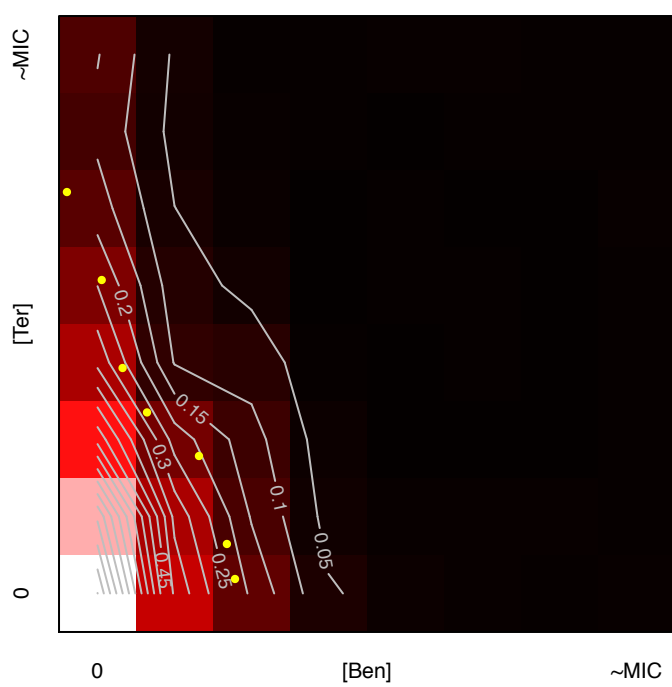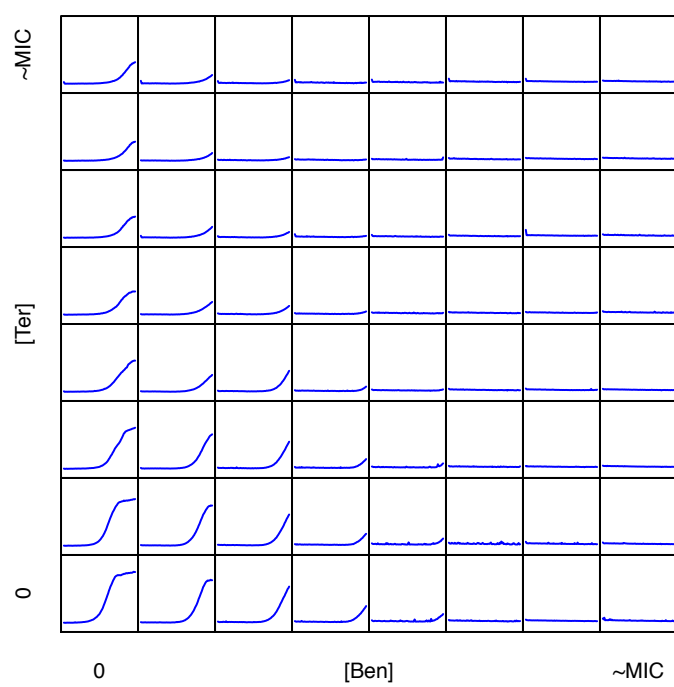

$\alpha = 0.5837991$

xliv

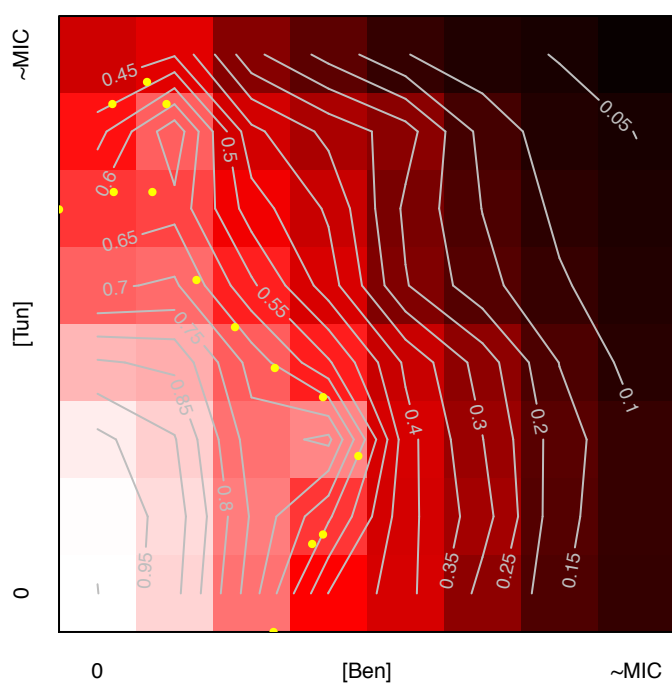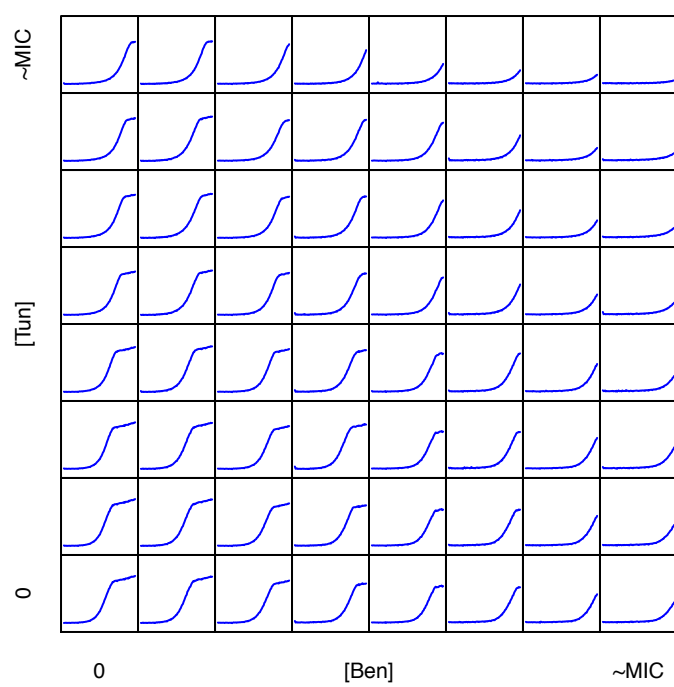

$\alpha = -0.07467064$

xliv

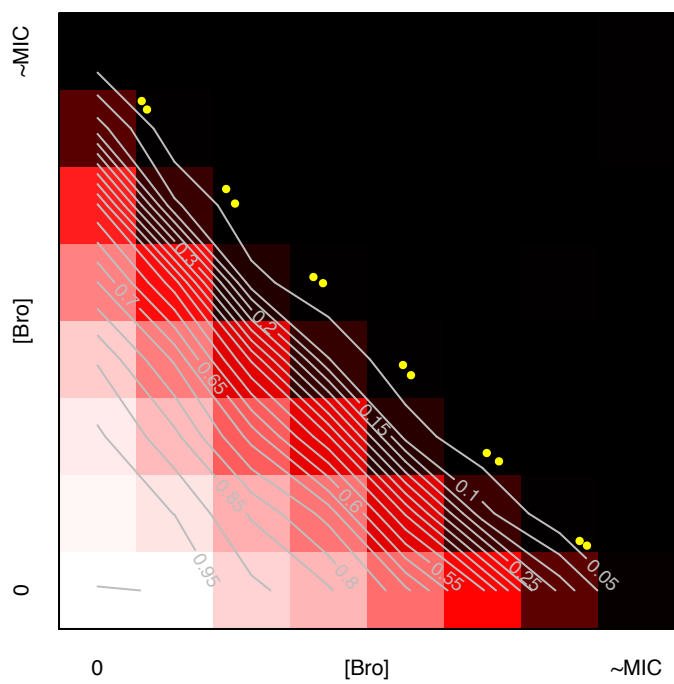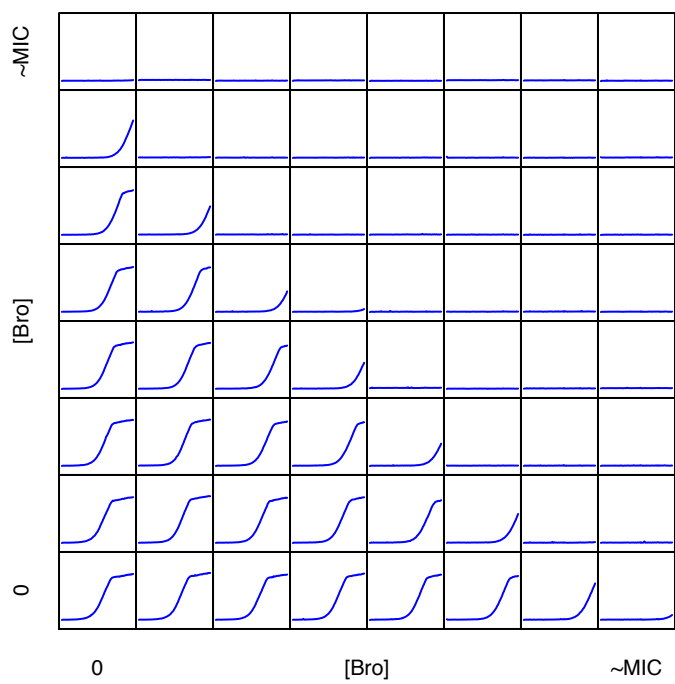

$\alpha = 2.031846$

xlvi

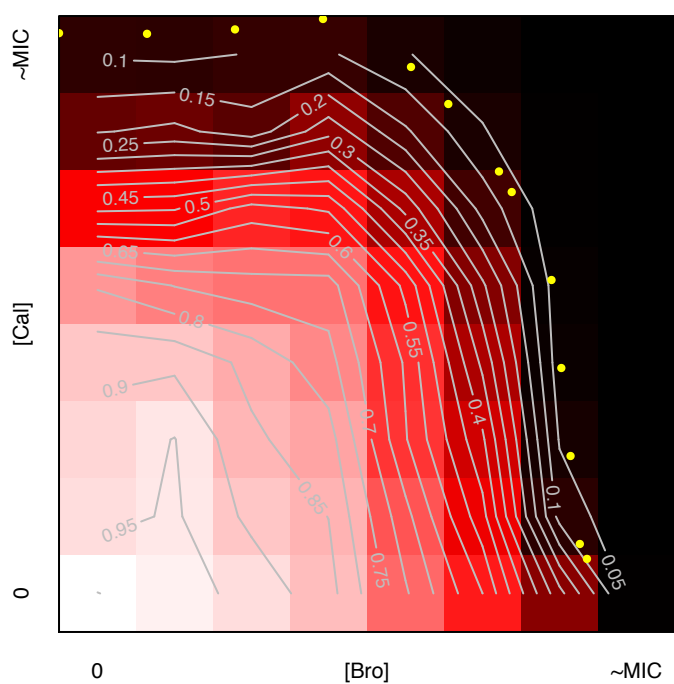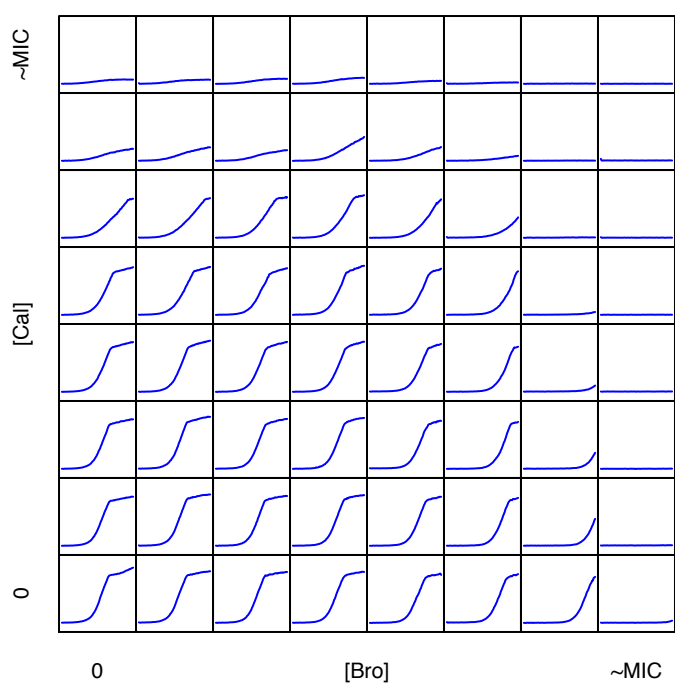

$\alpha = 1.199475$

xlvii

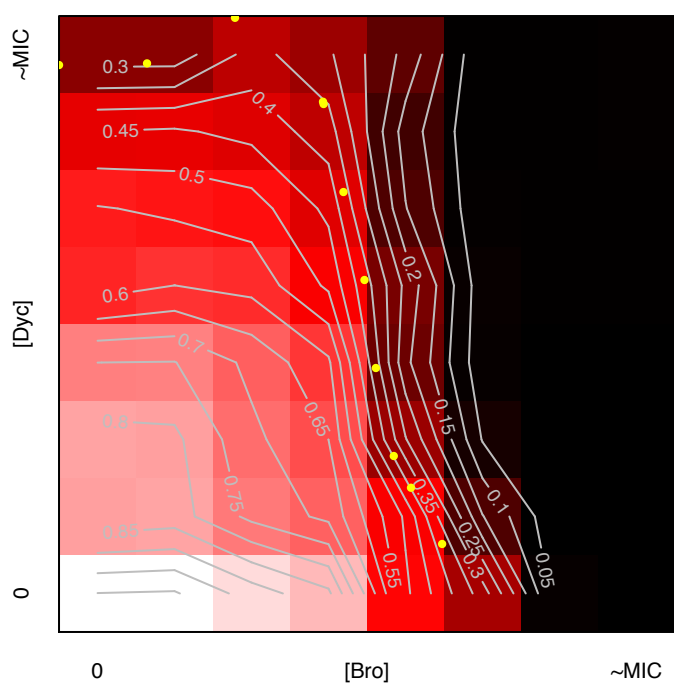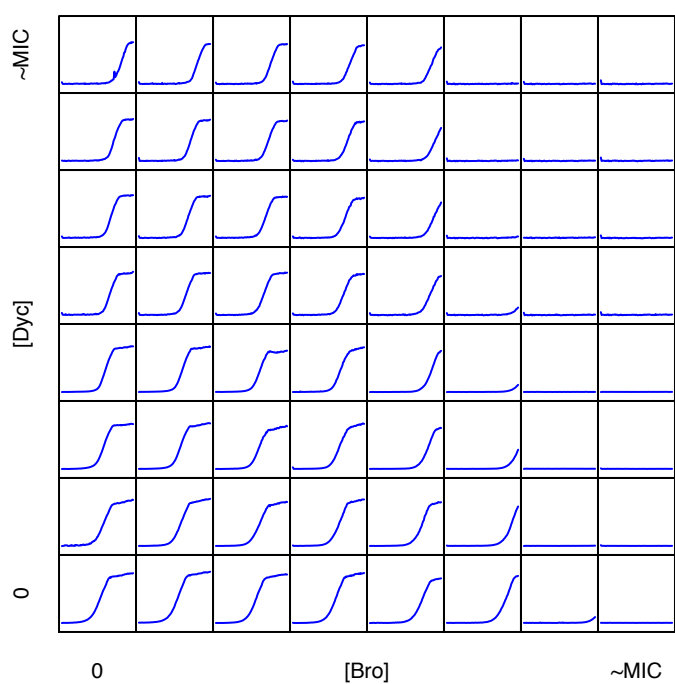

$\alpha = 1.337832$

xlviii

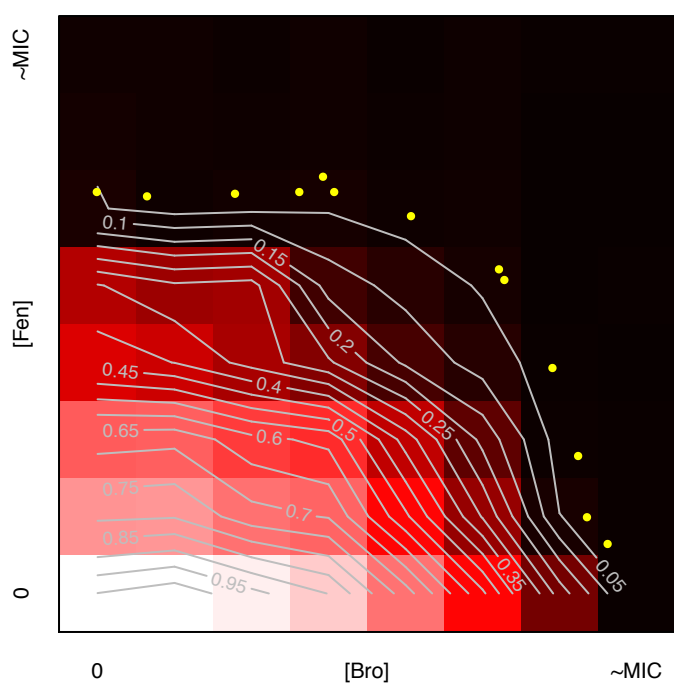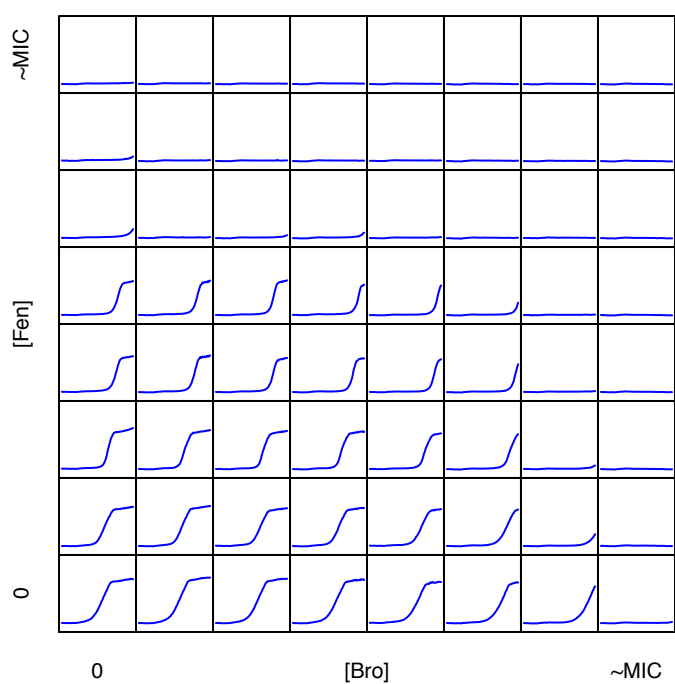

xlix

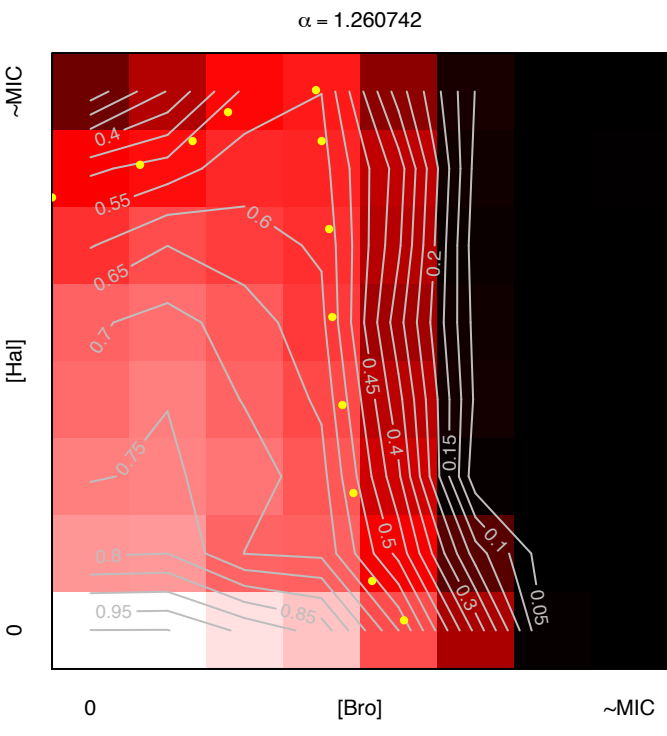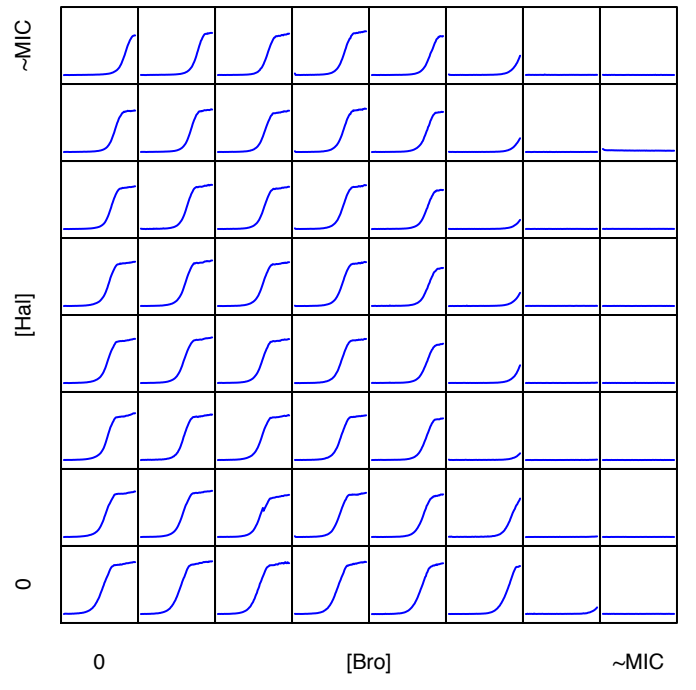

l

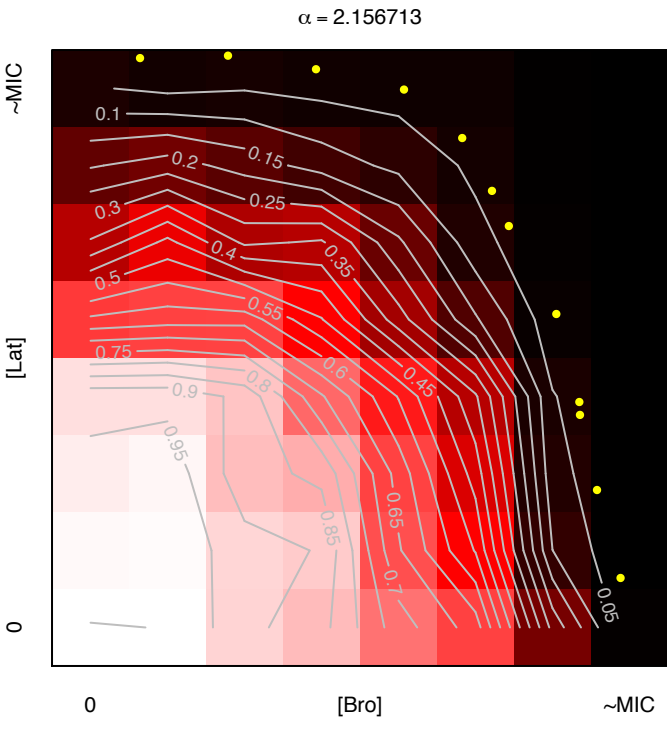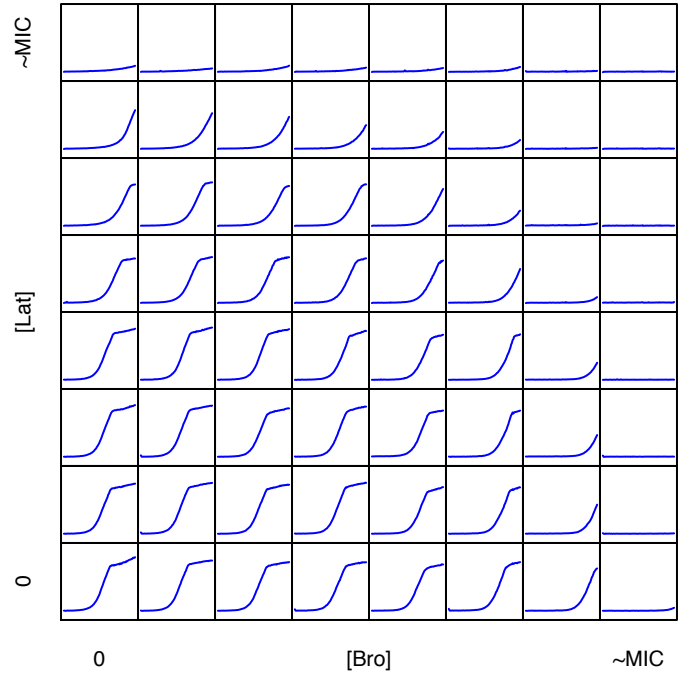

li

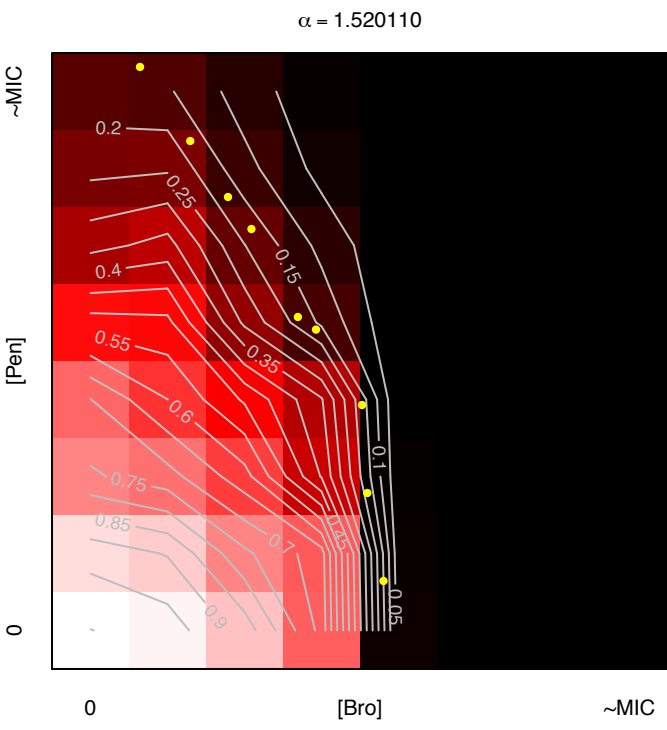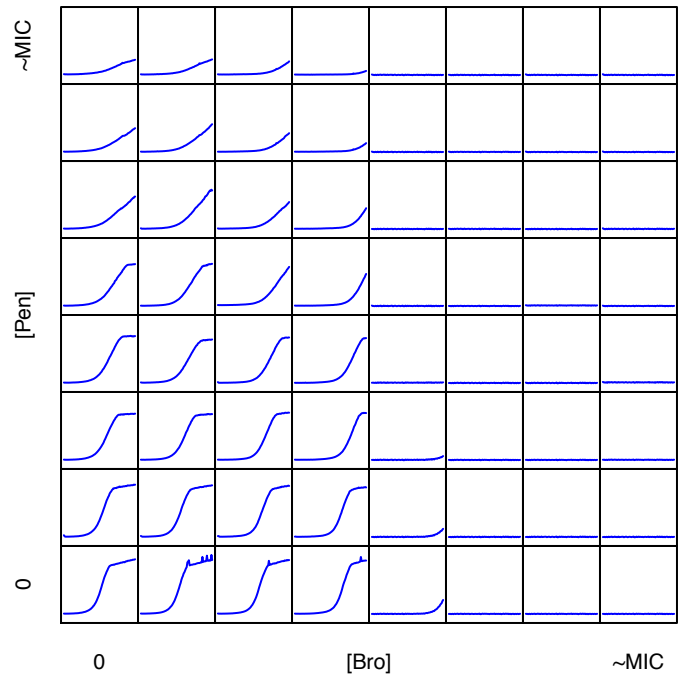

lii

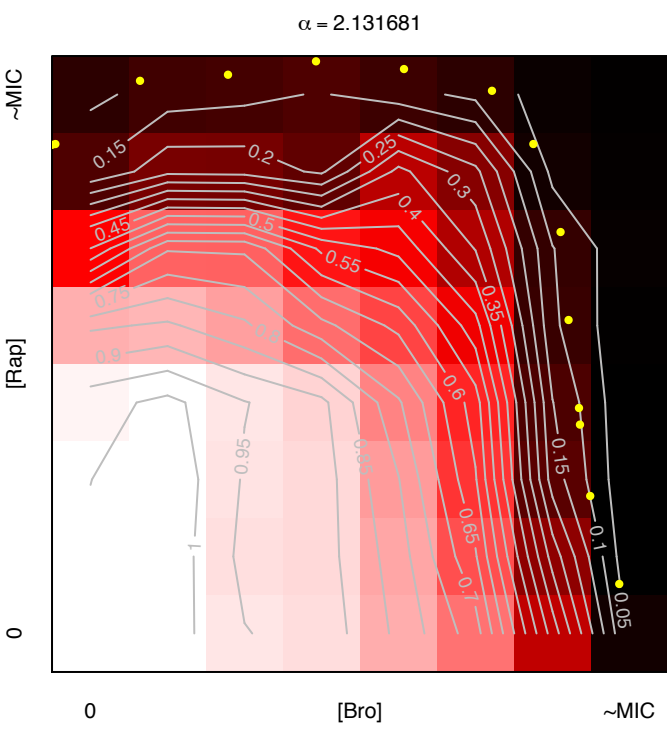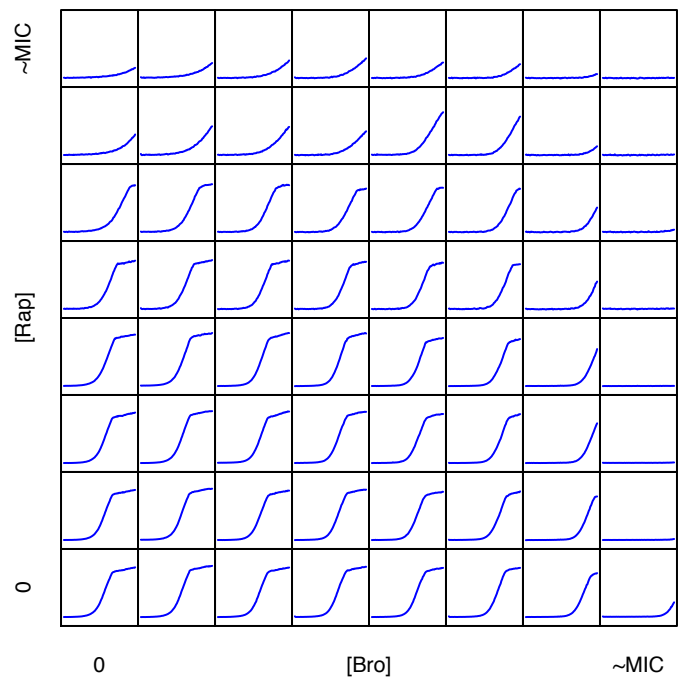

$\alpha = 2.827511$

liii

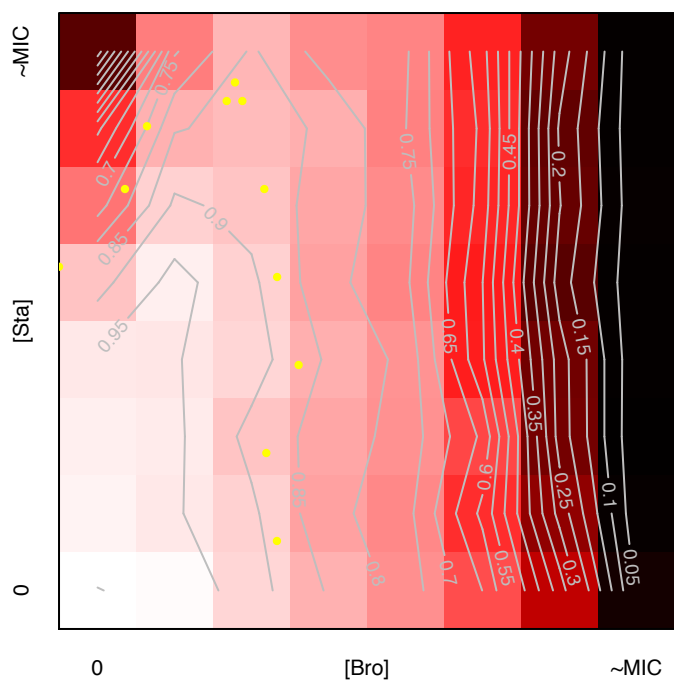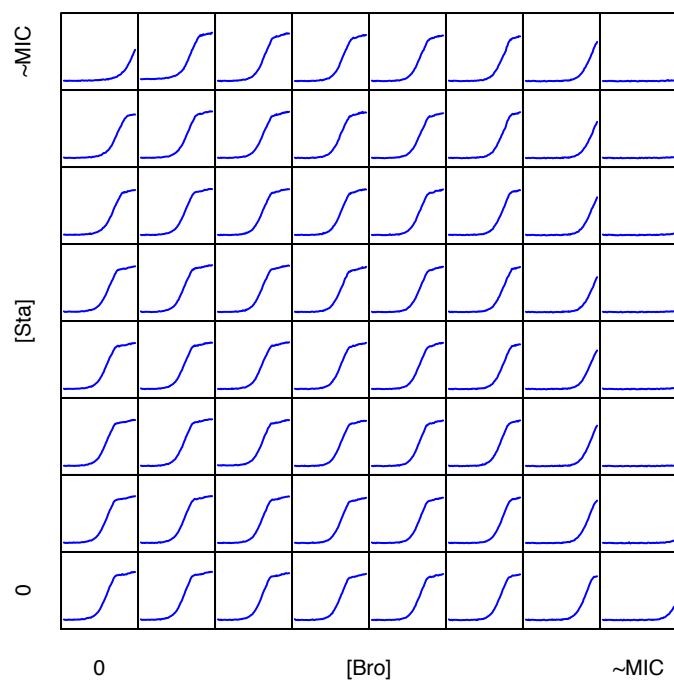

$\alpha = 1.048695$

liv

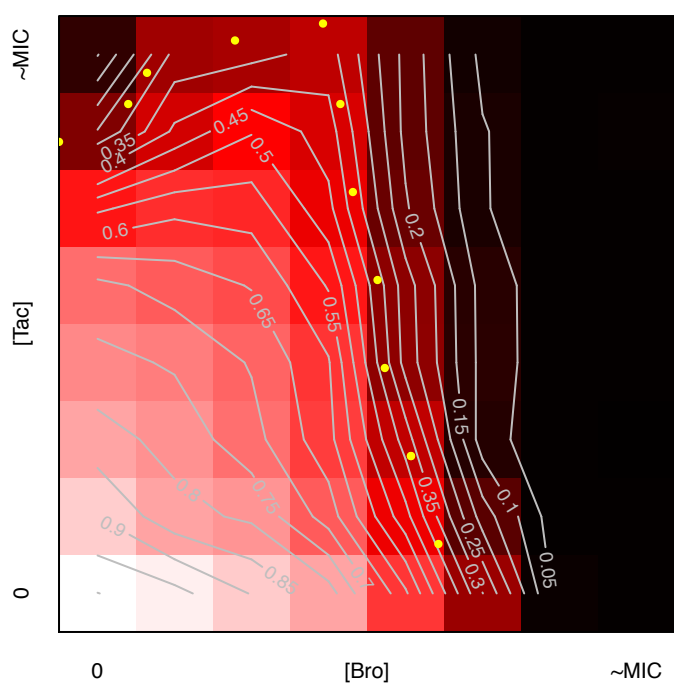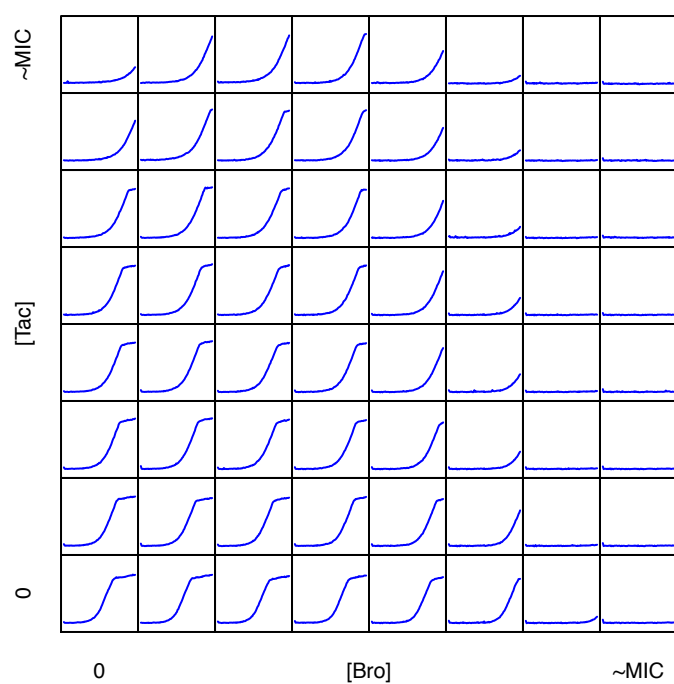

$\alpha = 0.7323619$

lv

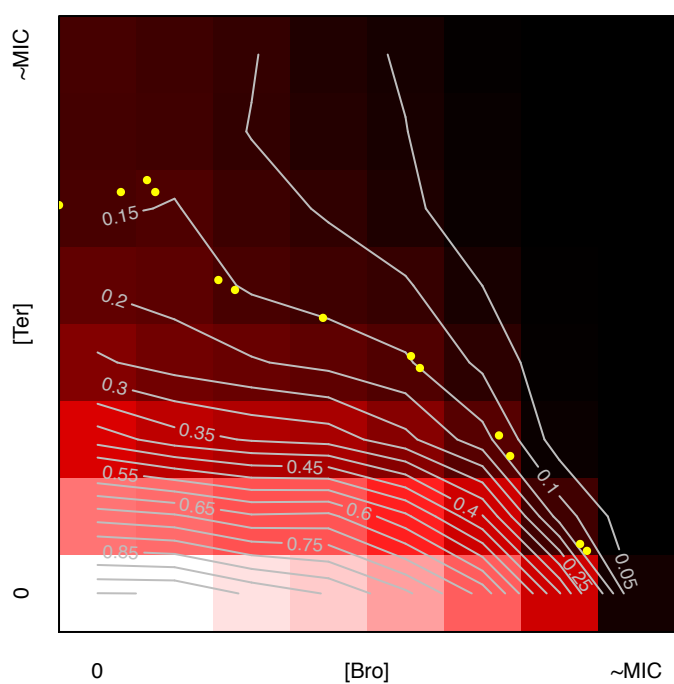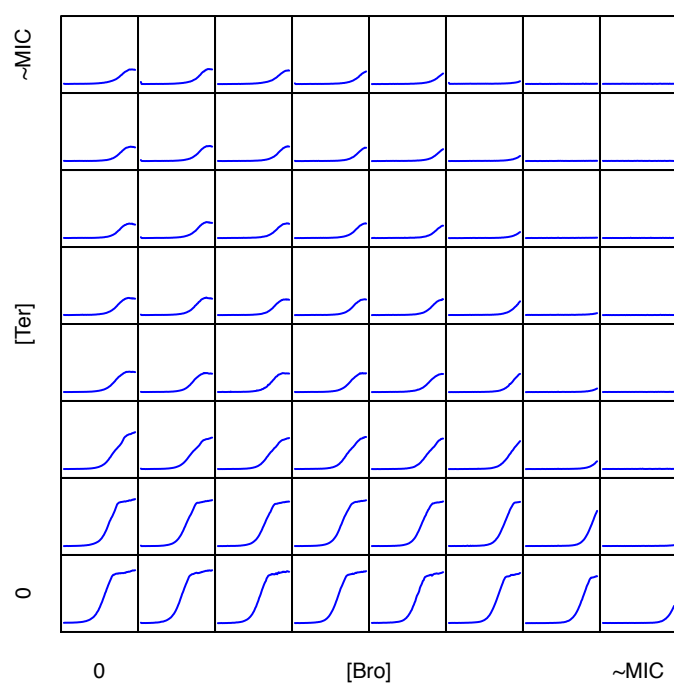

$\alpha = 0.898813$

lvi

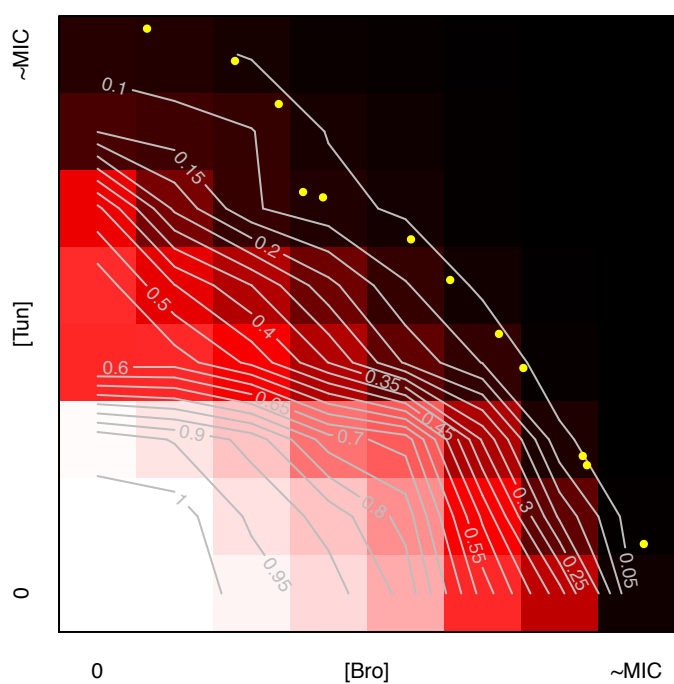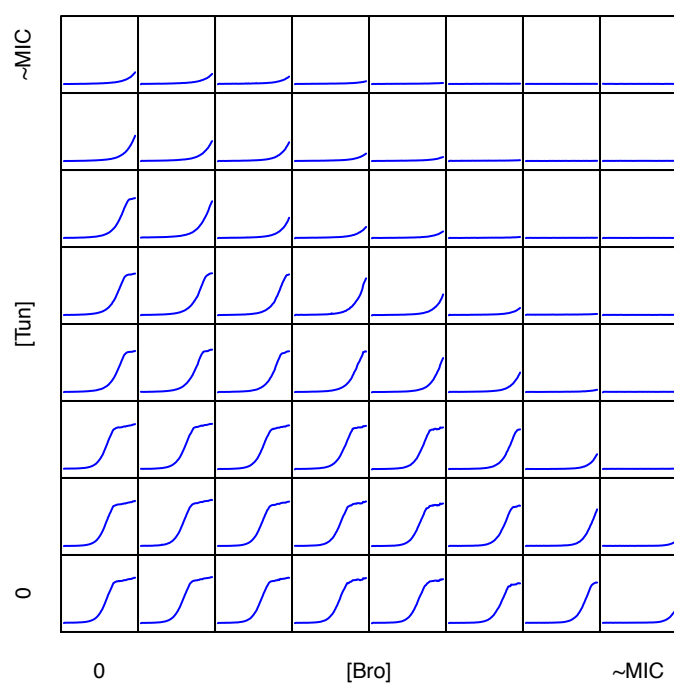

$\alpha = 0.3394801$

Ivii

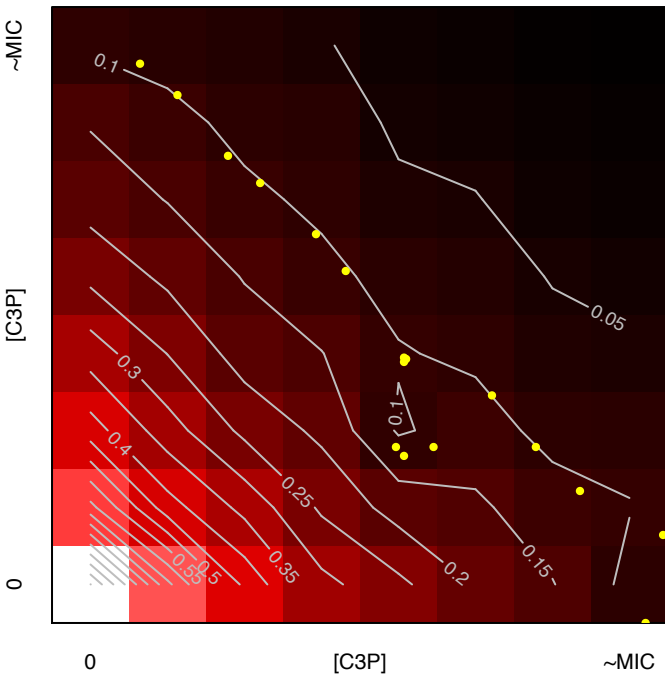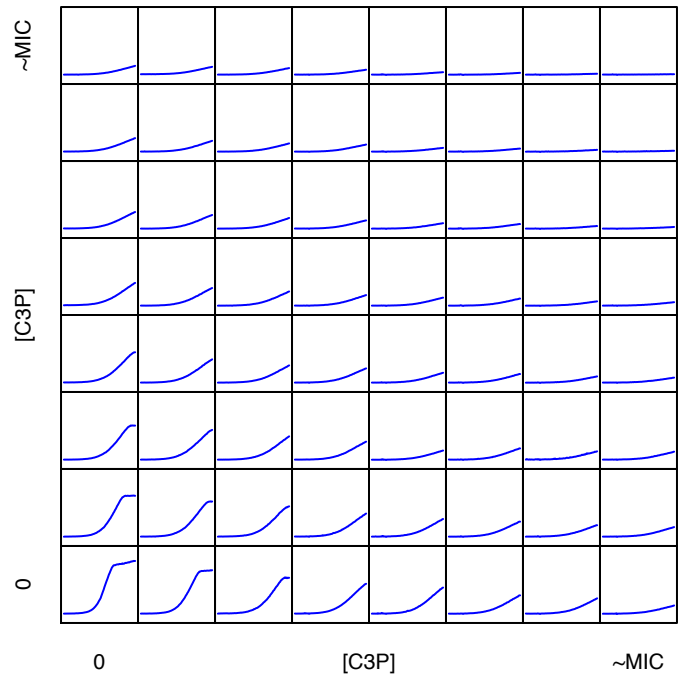

$\alpha = 1.432362$

Iviii

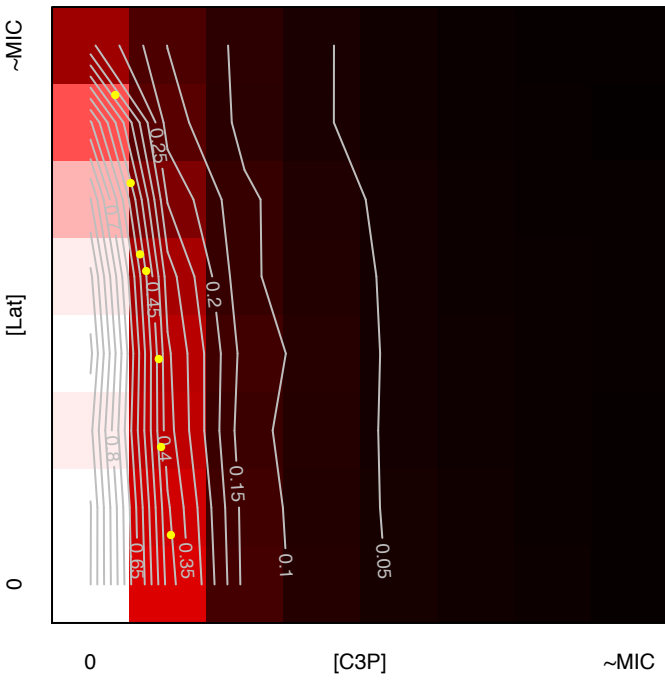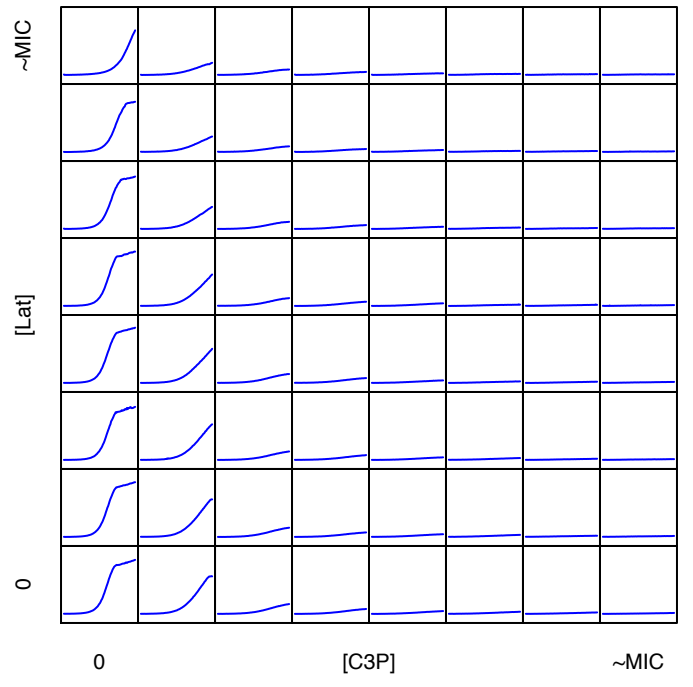

$\alpha = -1.410654$

lix

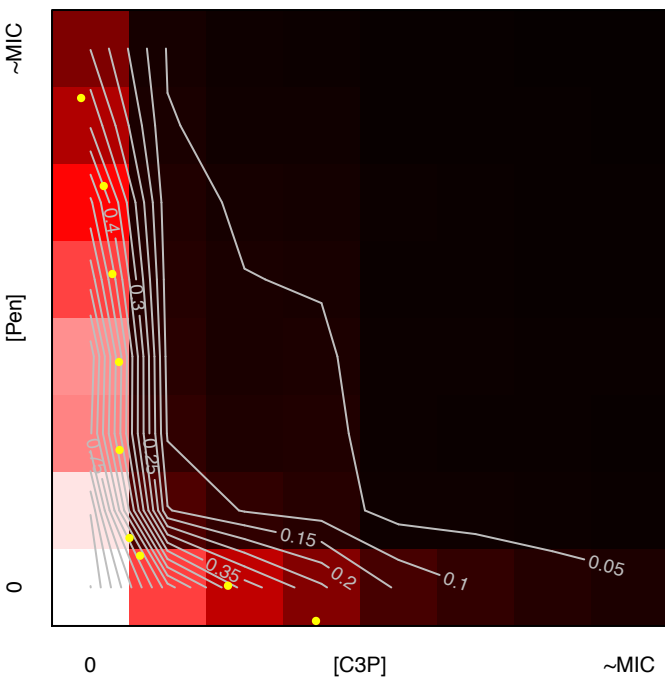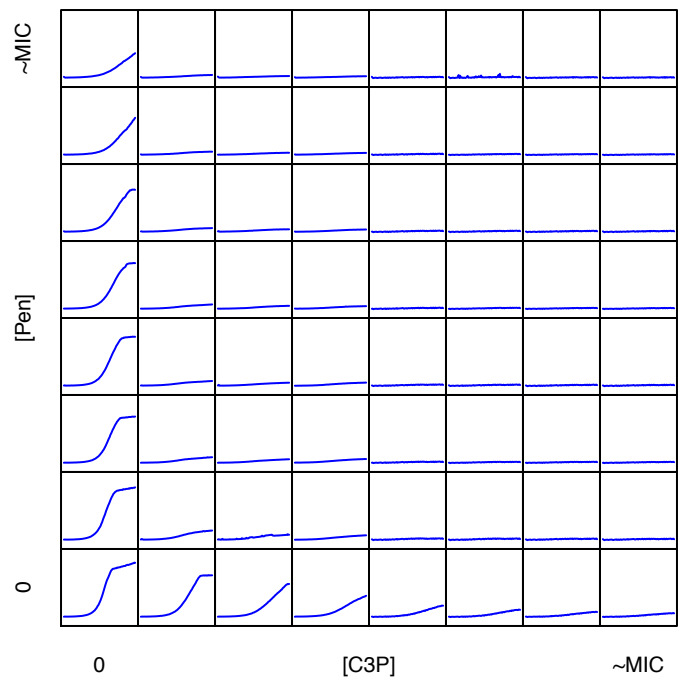

$\alpha = -0.1227124$

Ix

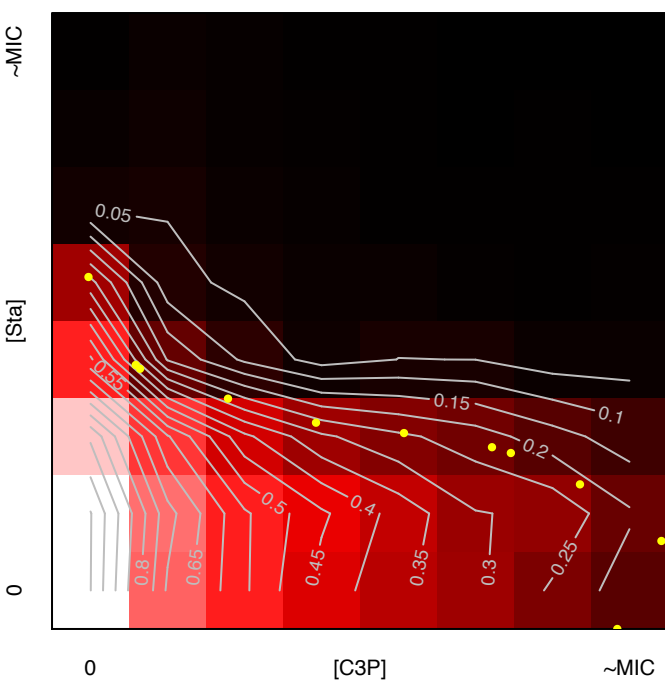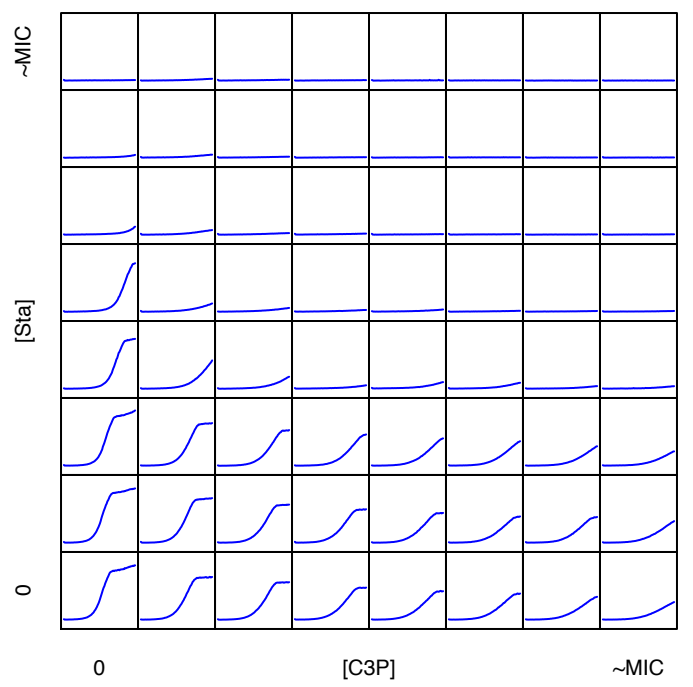

lxi

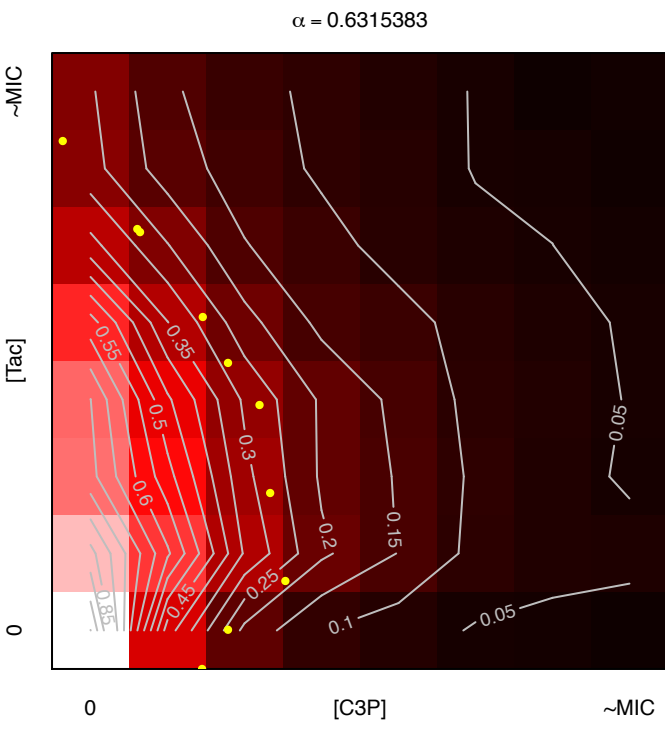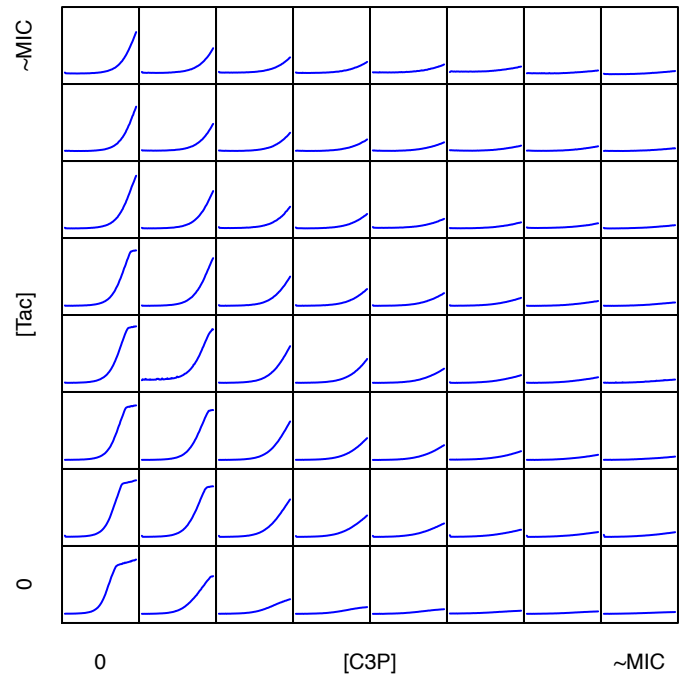

lxii

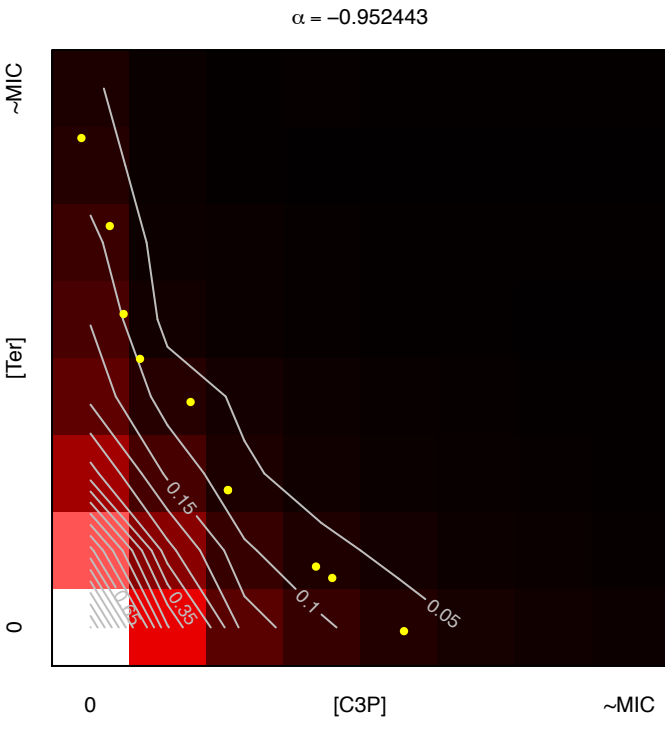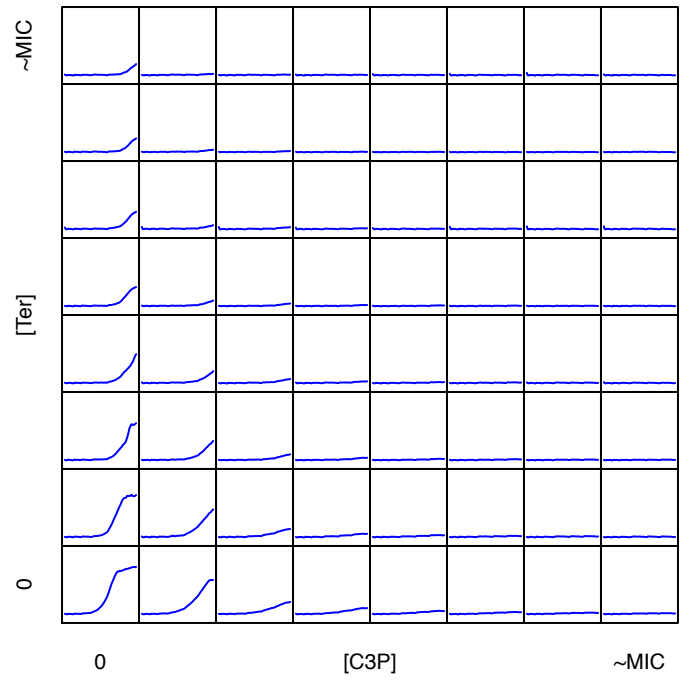

lxiii

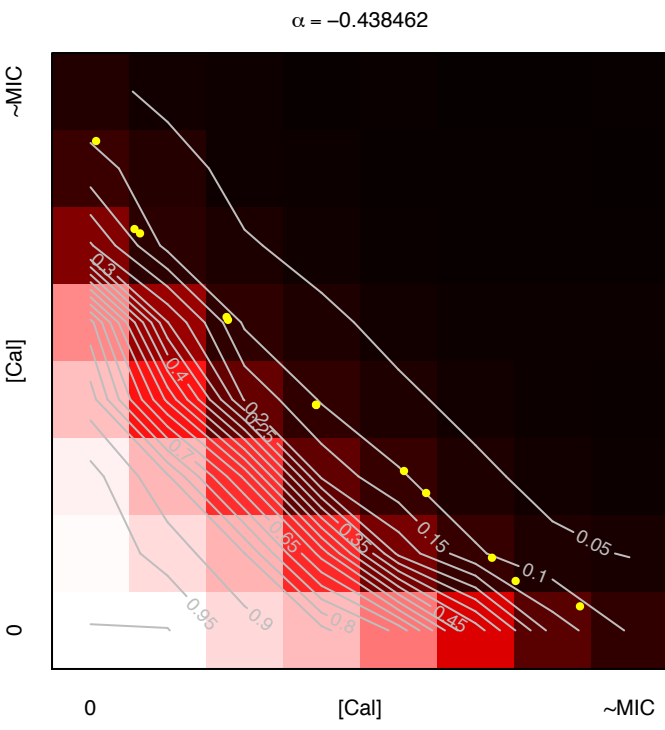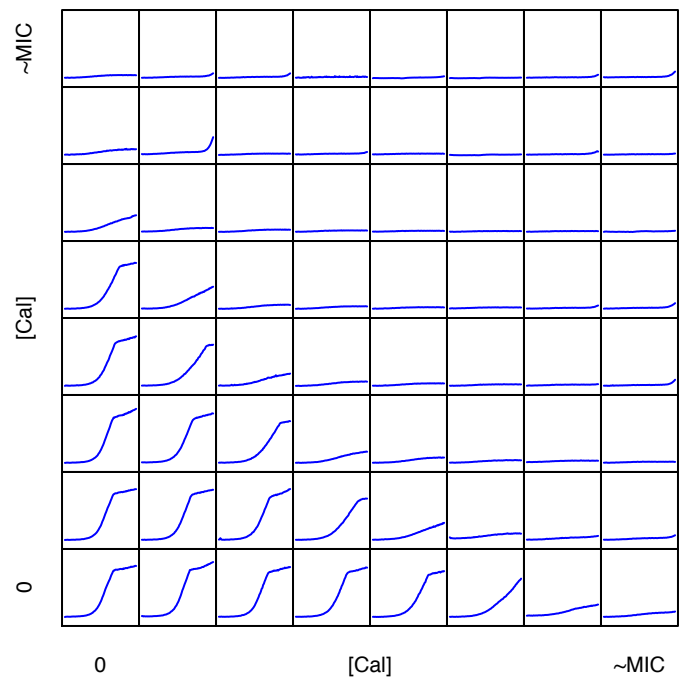

lxiv

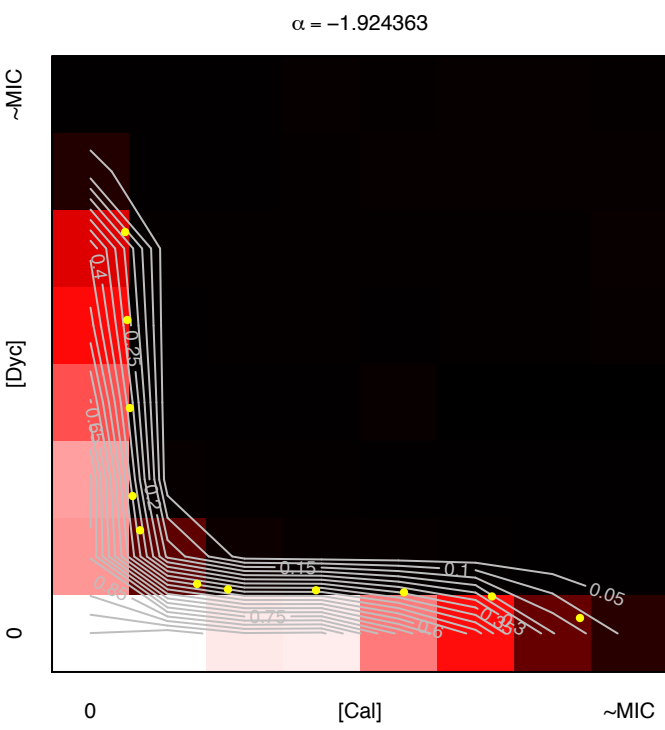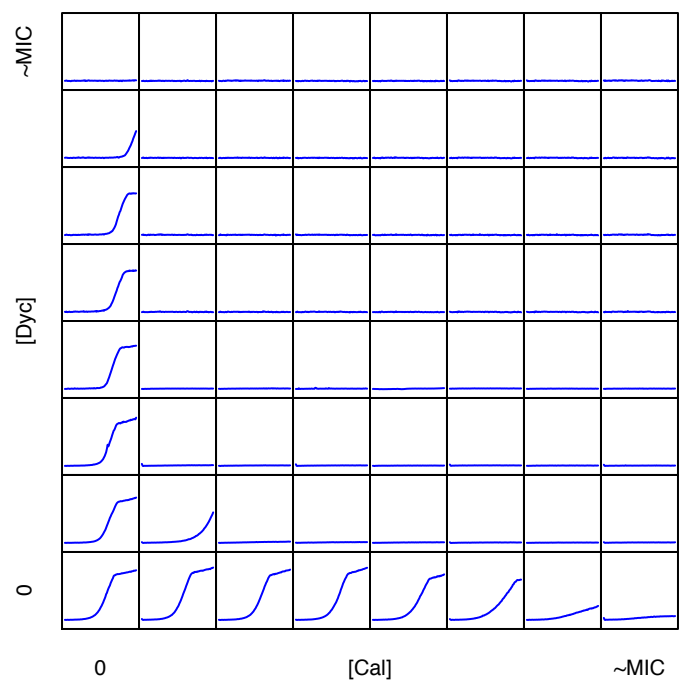



$\alpha = -1.534569$

lxv

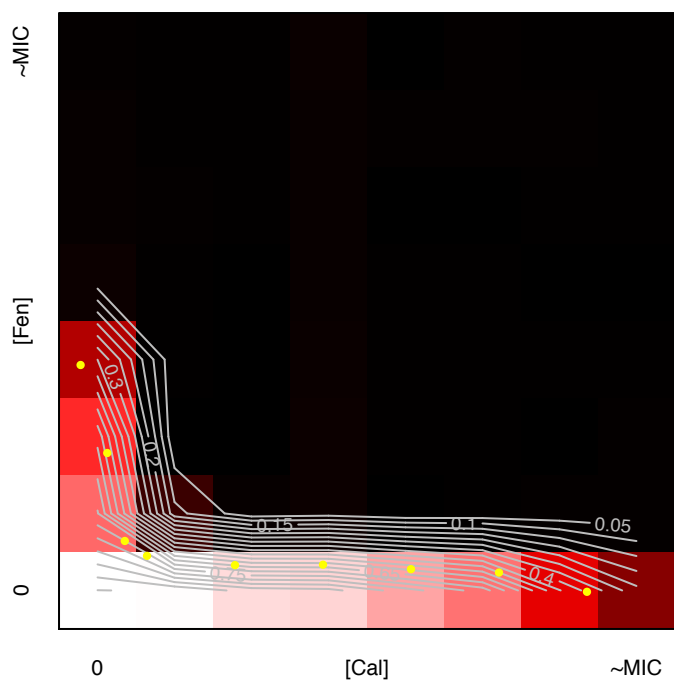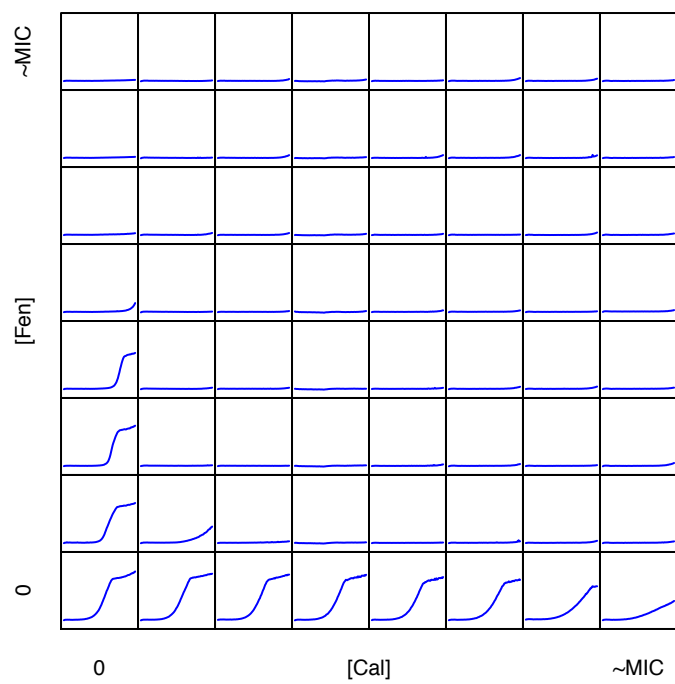

$\alpha = -1.882422$

lxvi

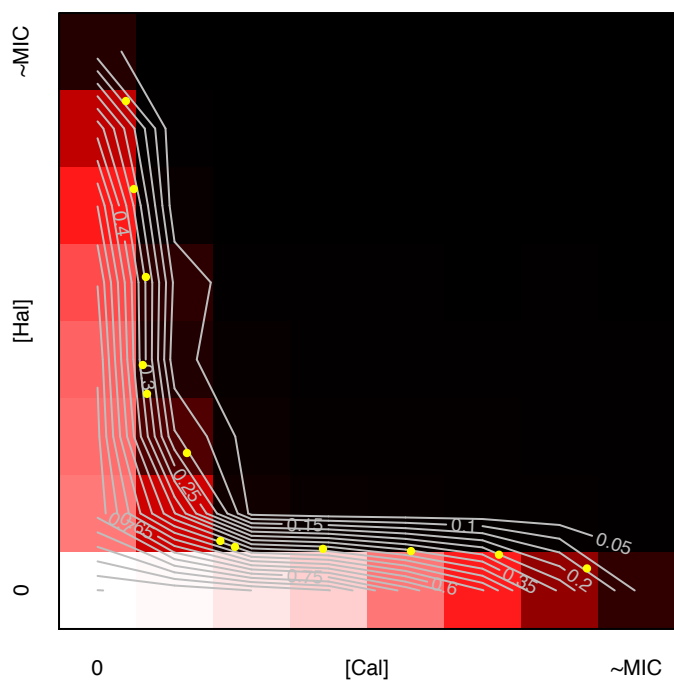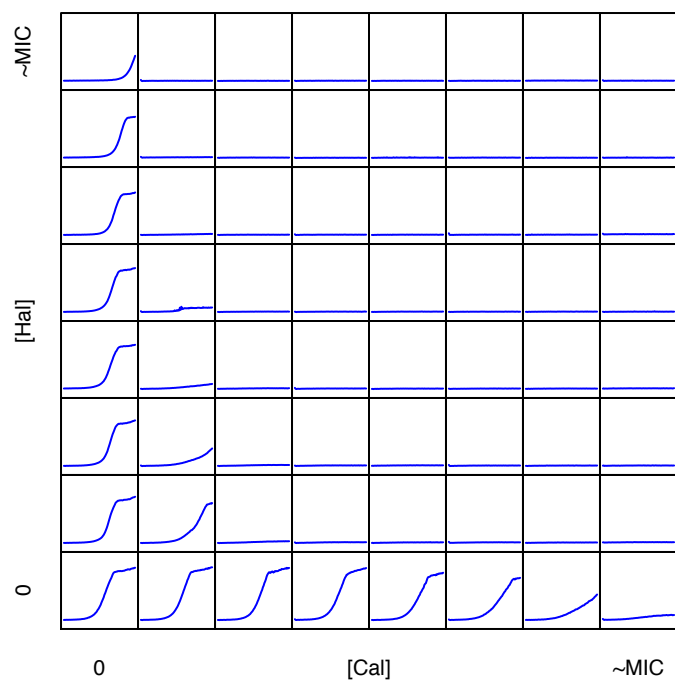

$\alpha = 1.270145$

lxvii

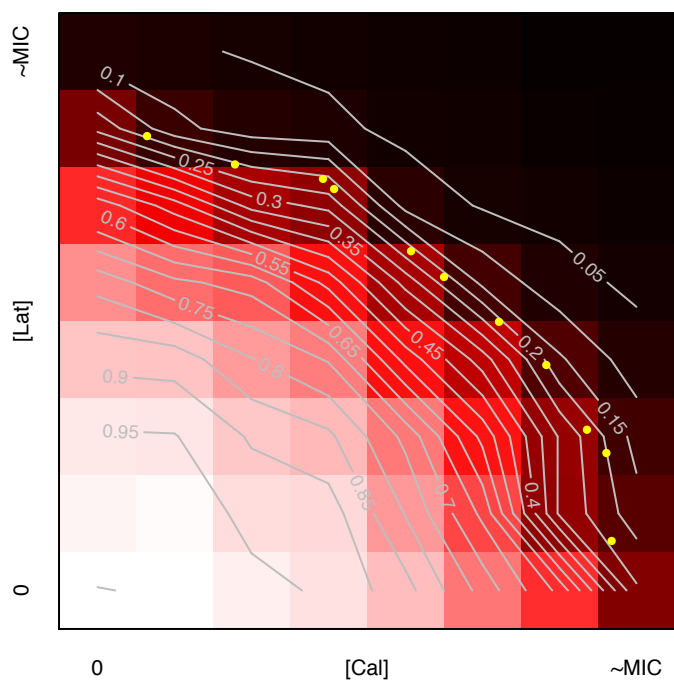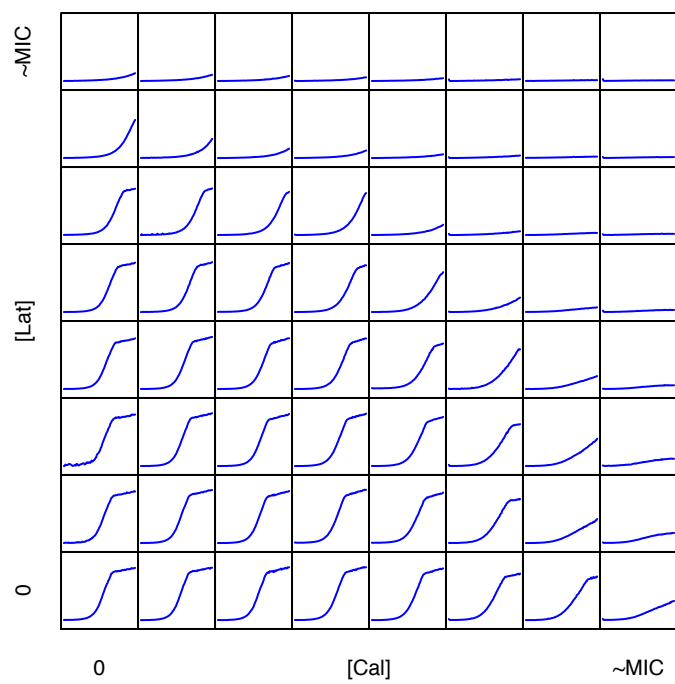

$\alpha = -1.298967$

lxviii

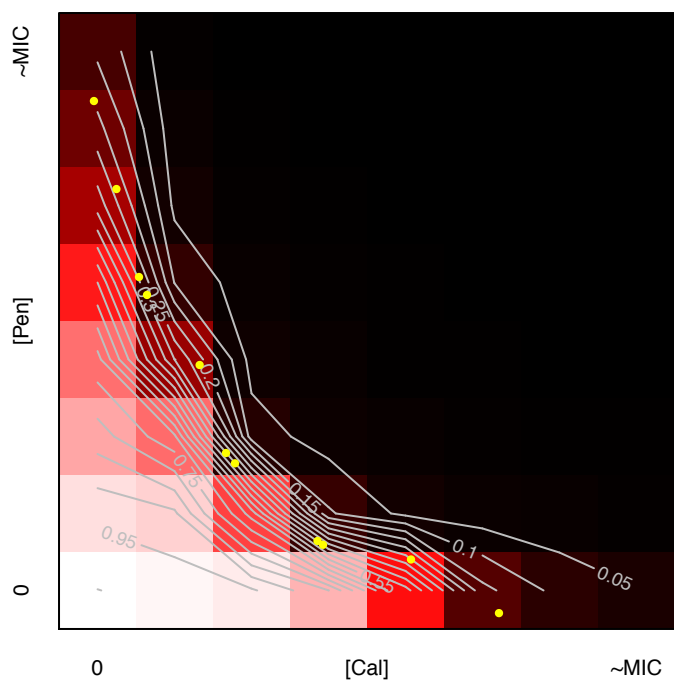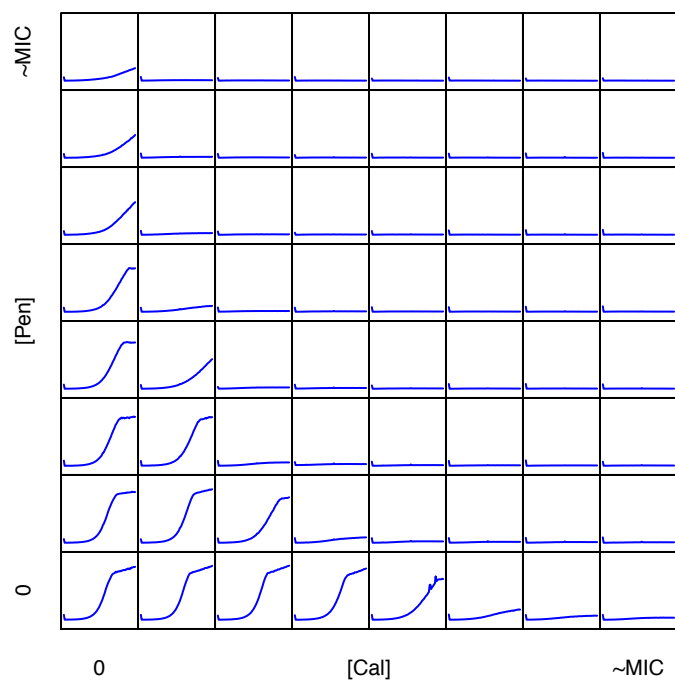

lxi

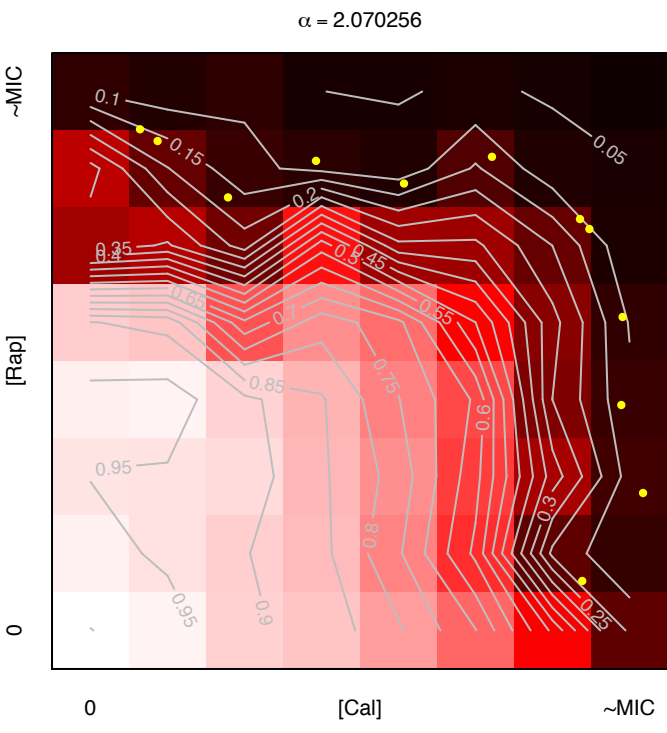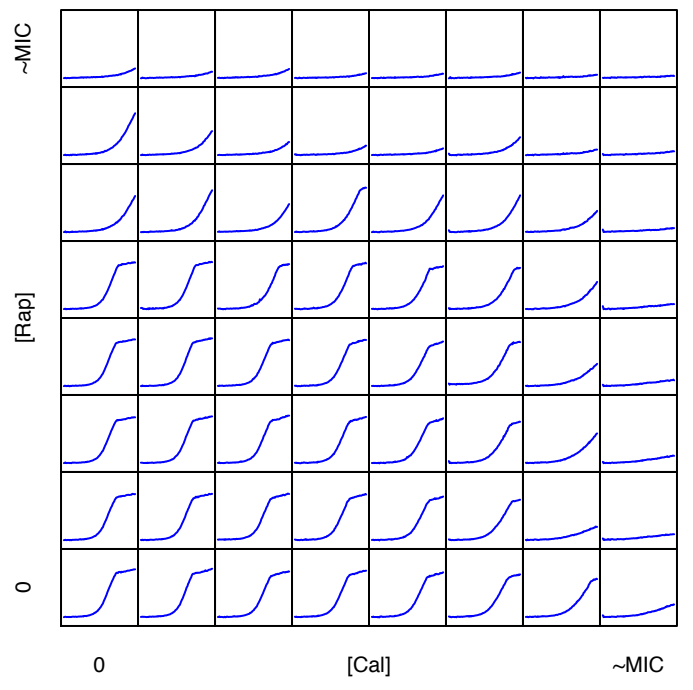

lxx

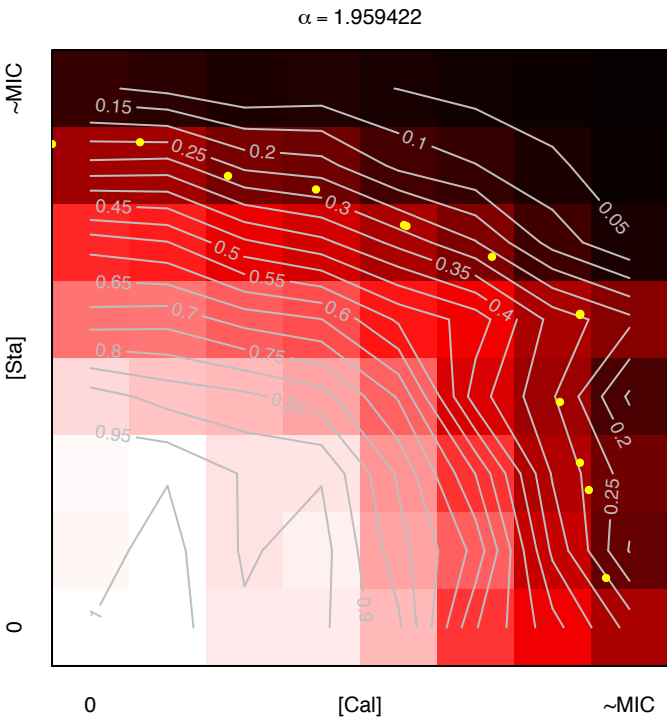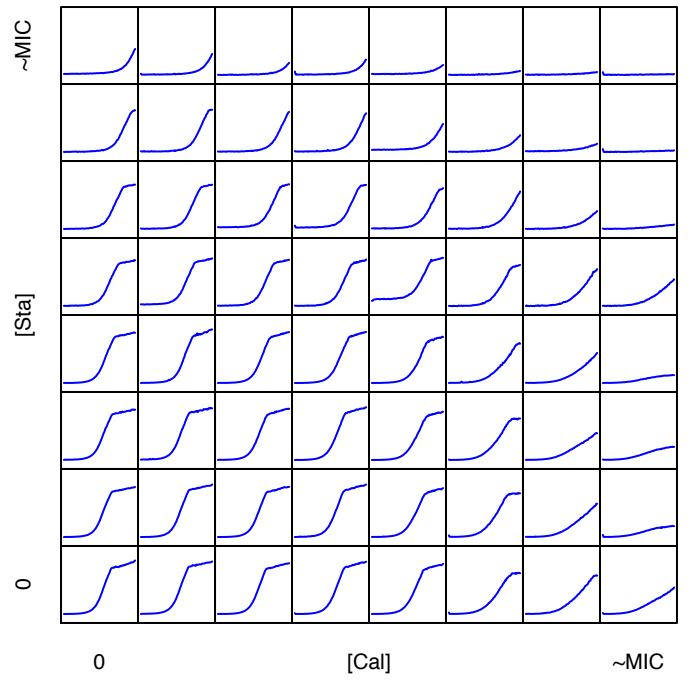

lxxi

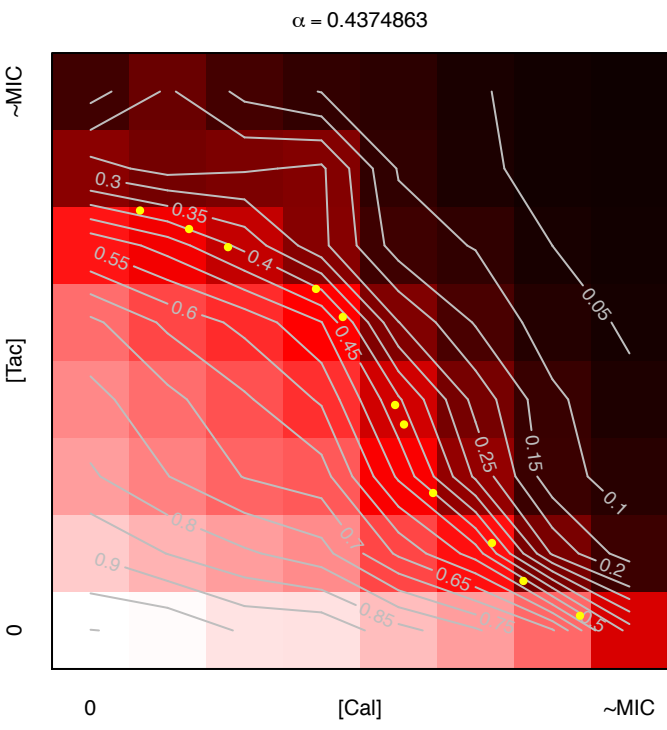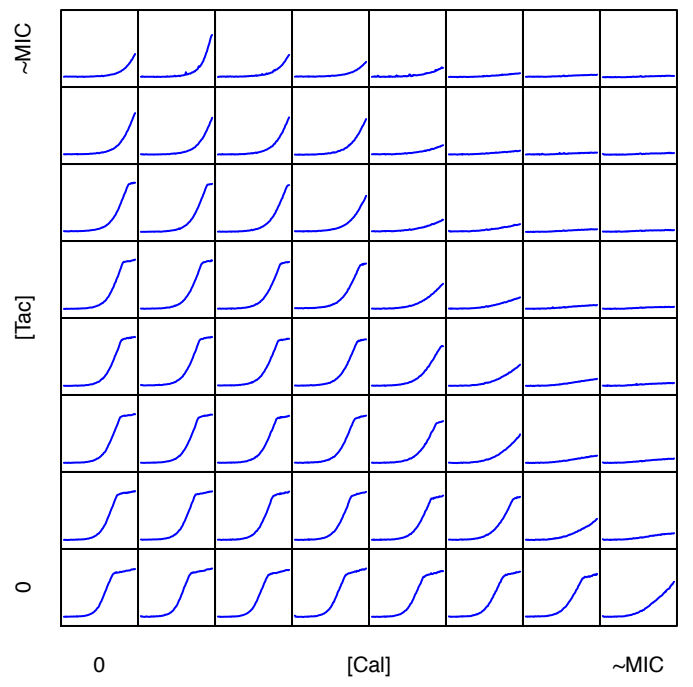

lxxii

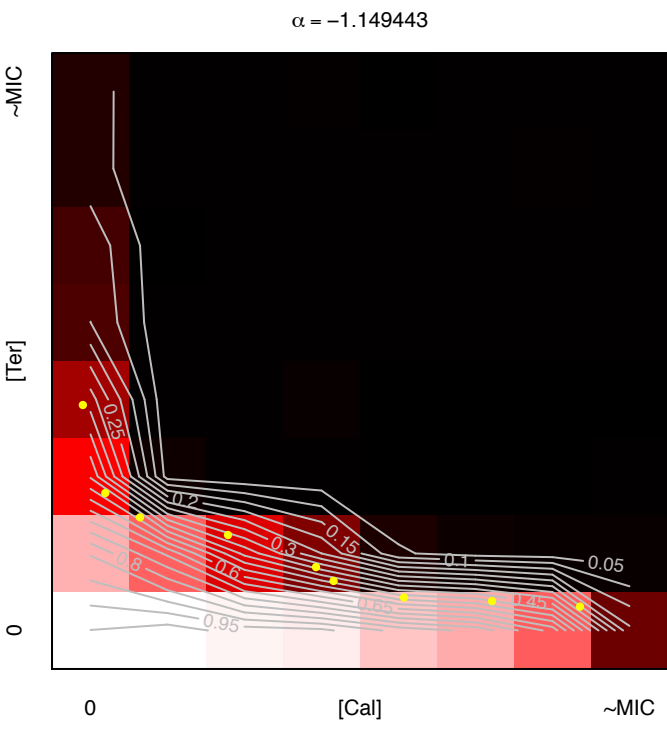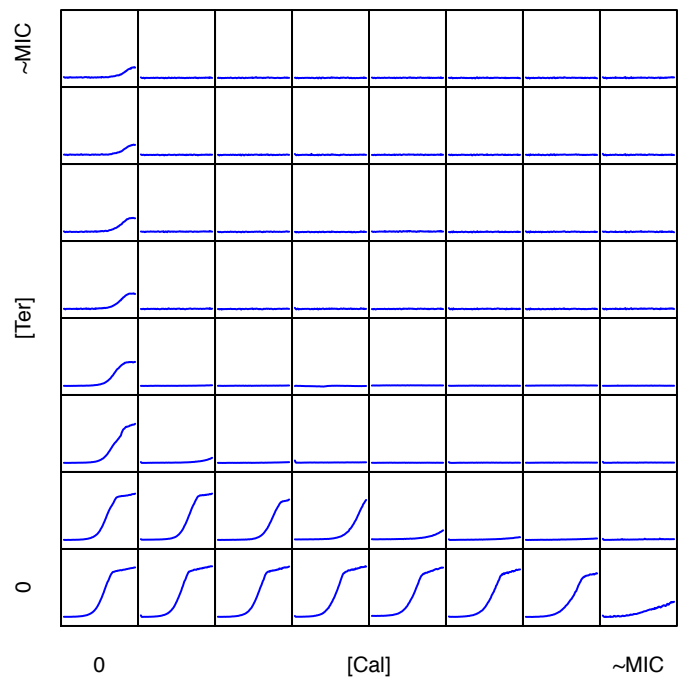

$\alpha = 0.4485827$

lxxiii

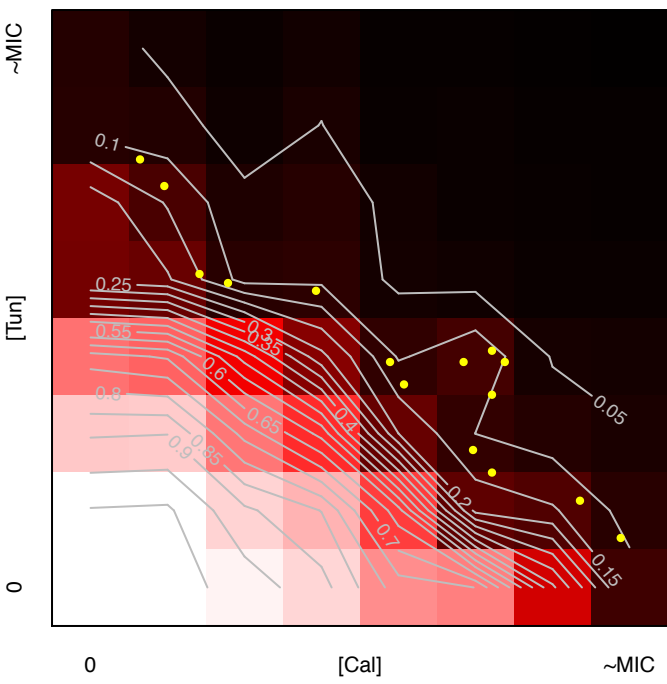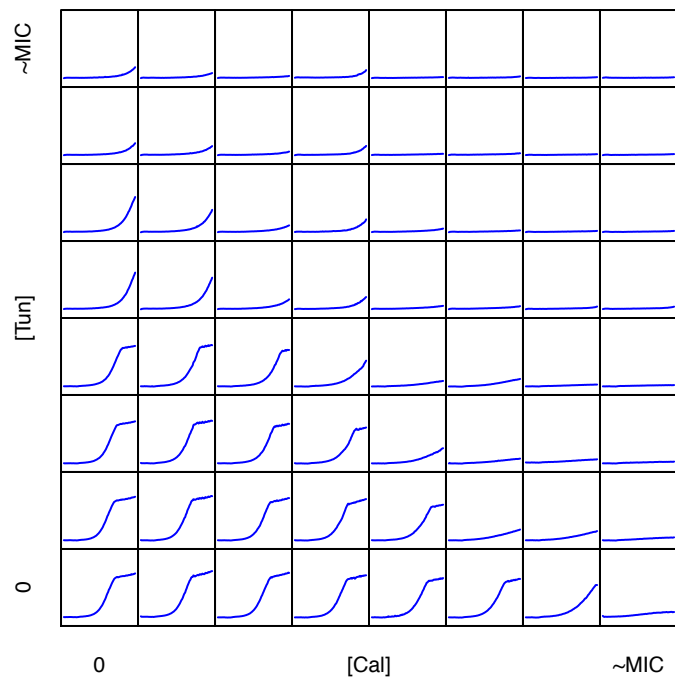

$\alpha = 0.3993201$

lxxiv

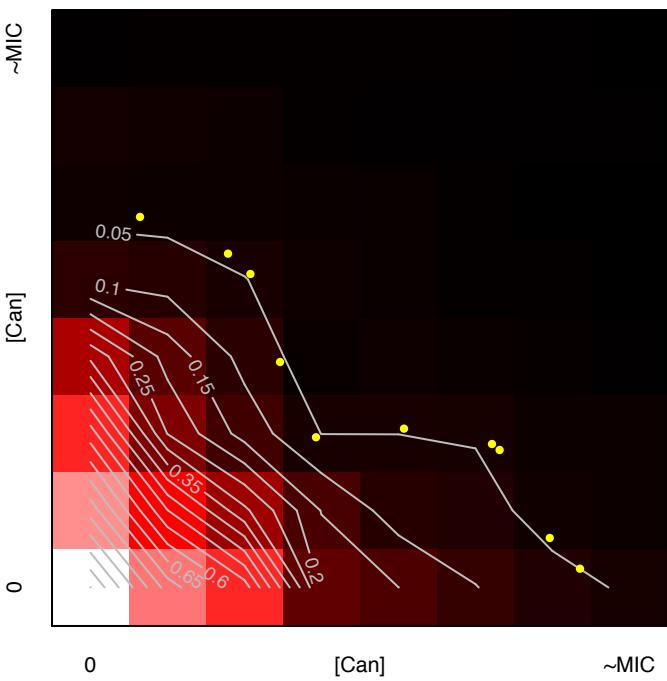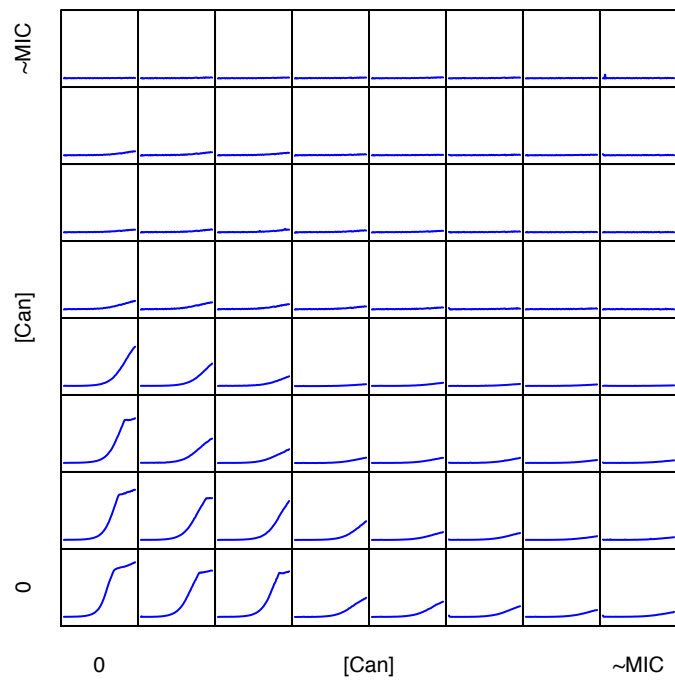

$\alpha = 1.157684$

lxxv

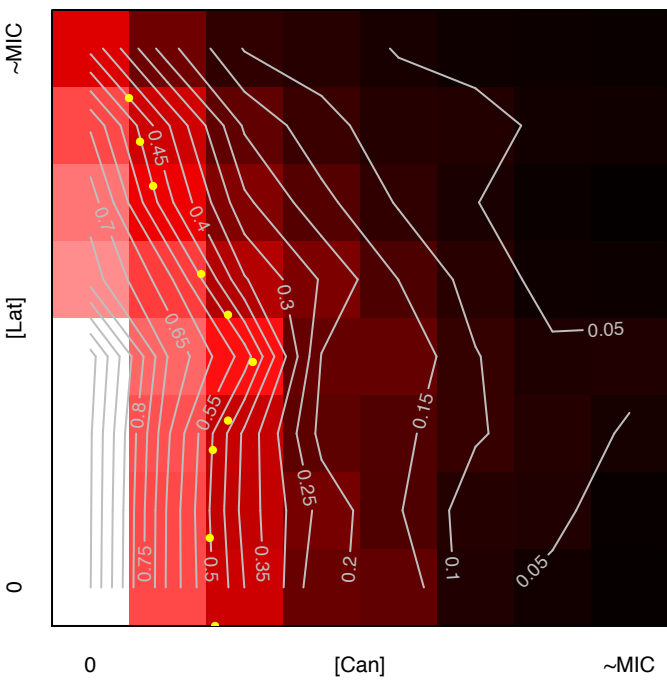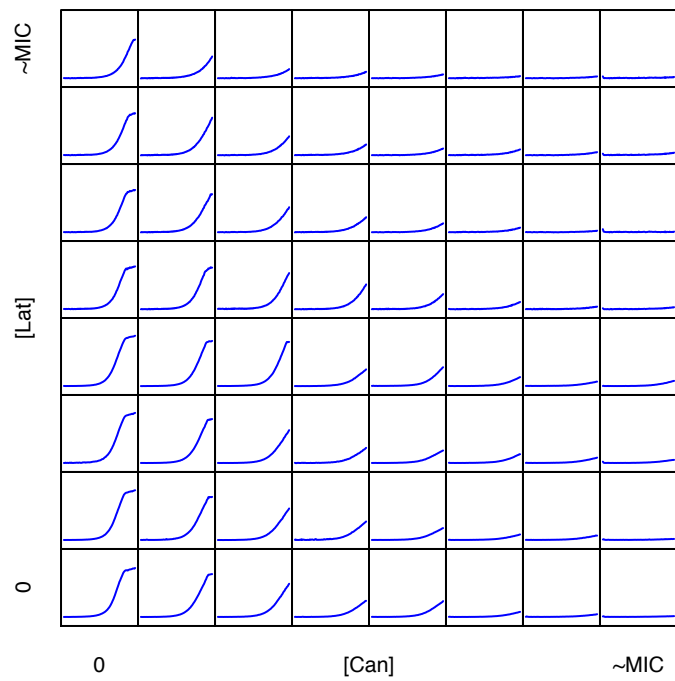

$\alpha = 0.08059704$

lxxvi

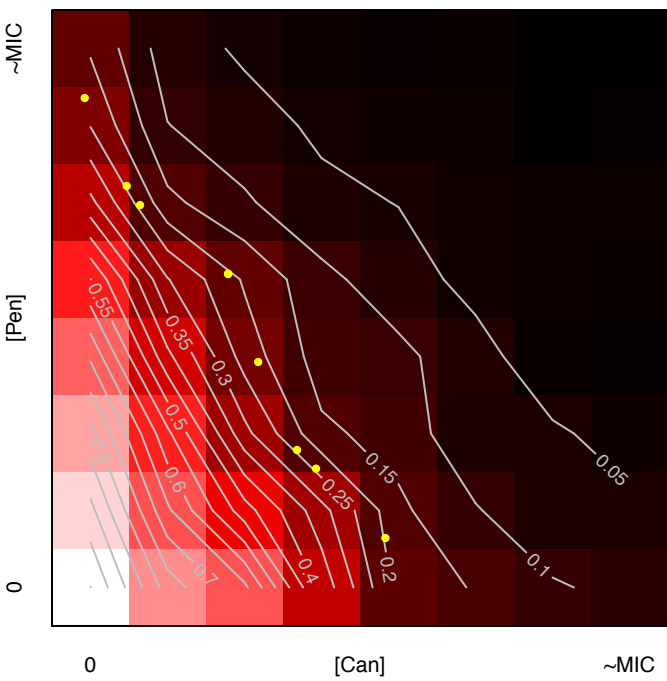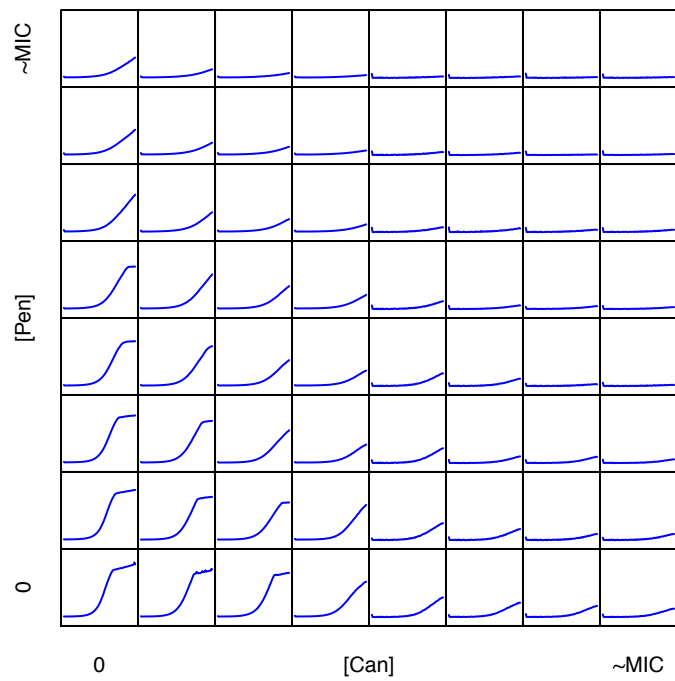

$\alpha = 1.543557$

lxxvii

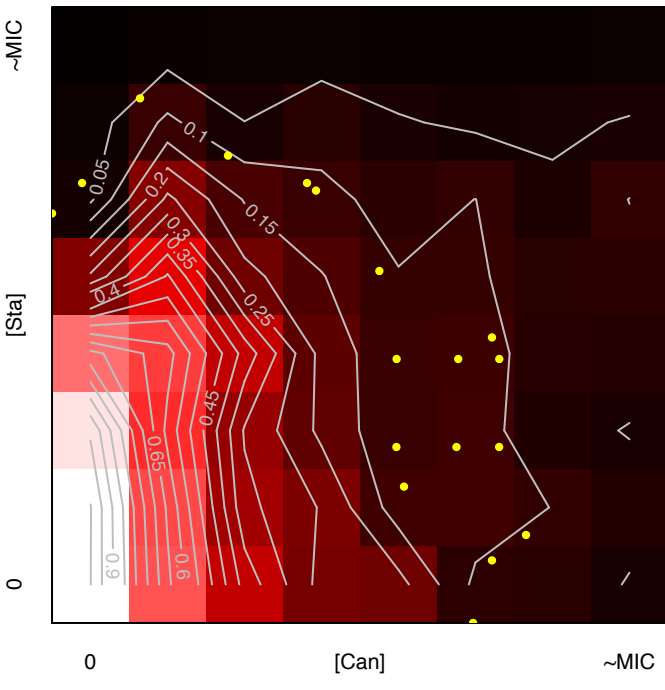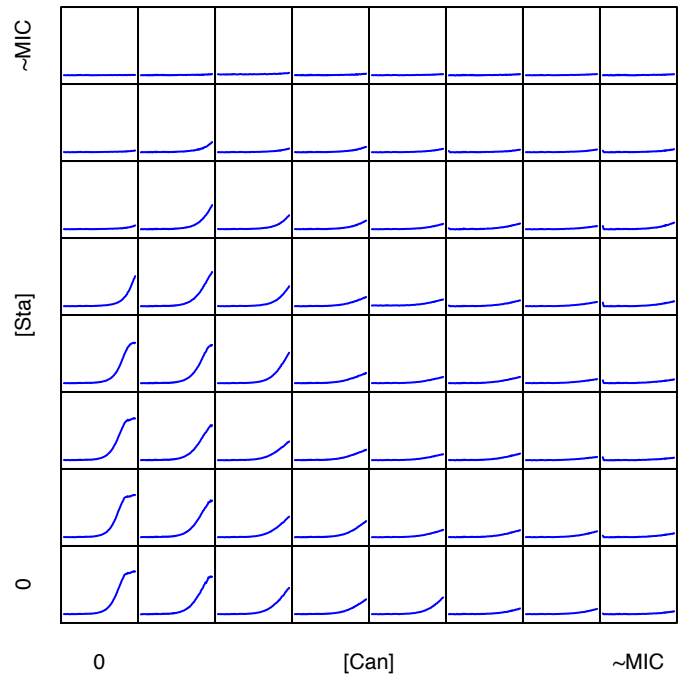

$\alpha = -1.221525$

lxxviii

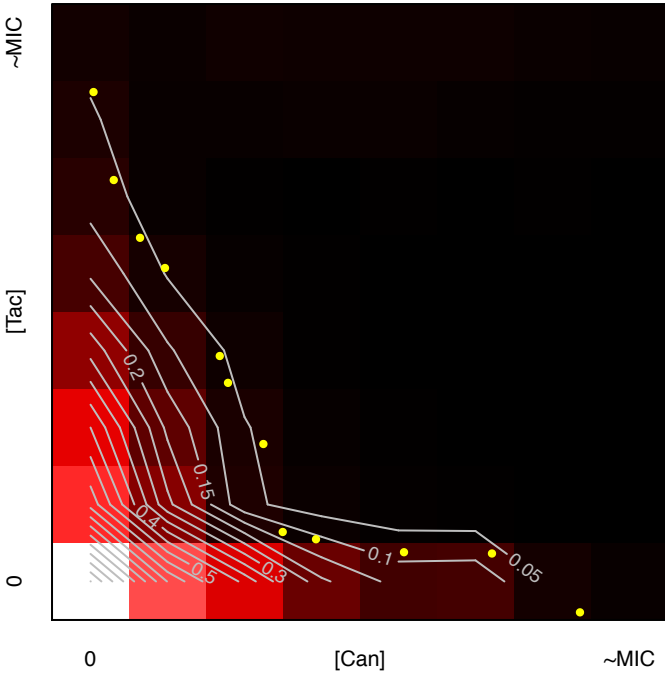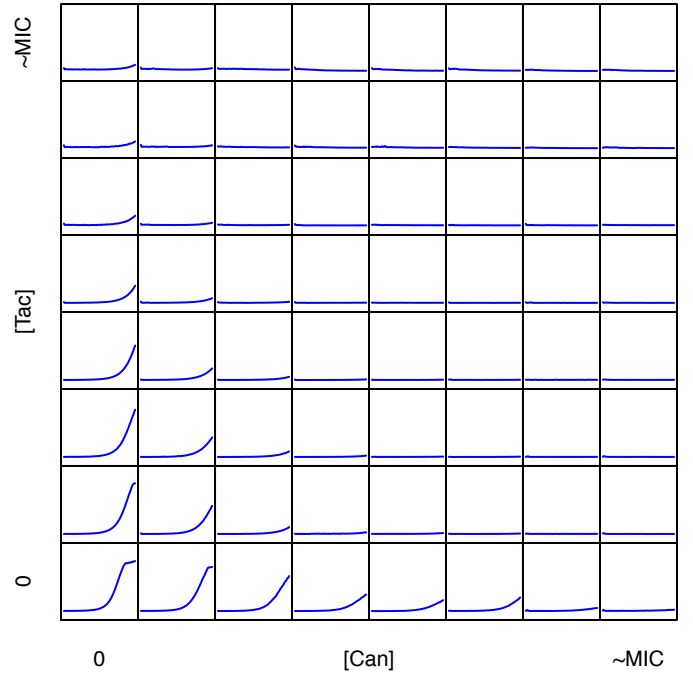

$\alpha = -0.8706326$

lxxix

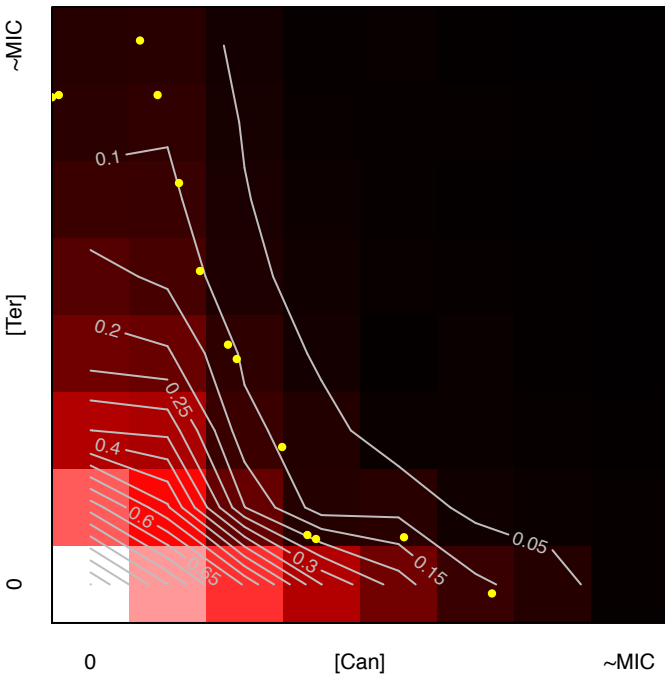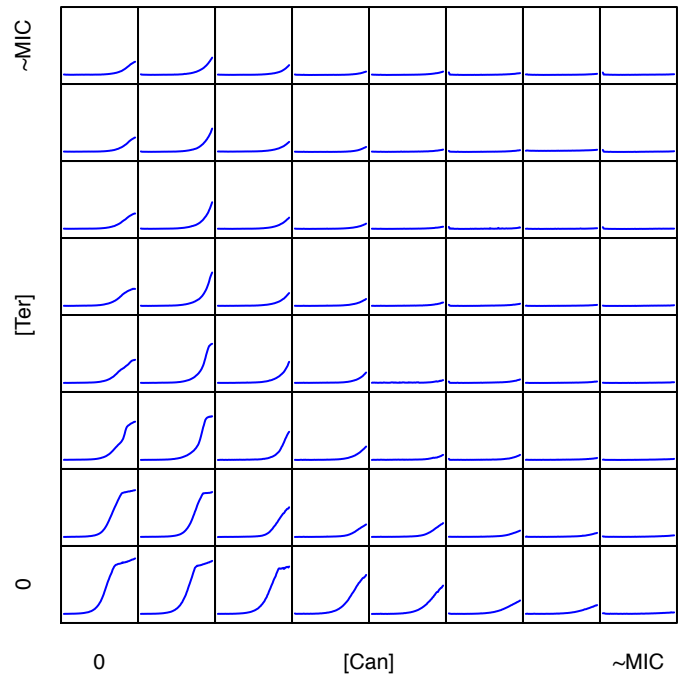

$\alpha = 0.6301139$

lxxx

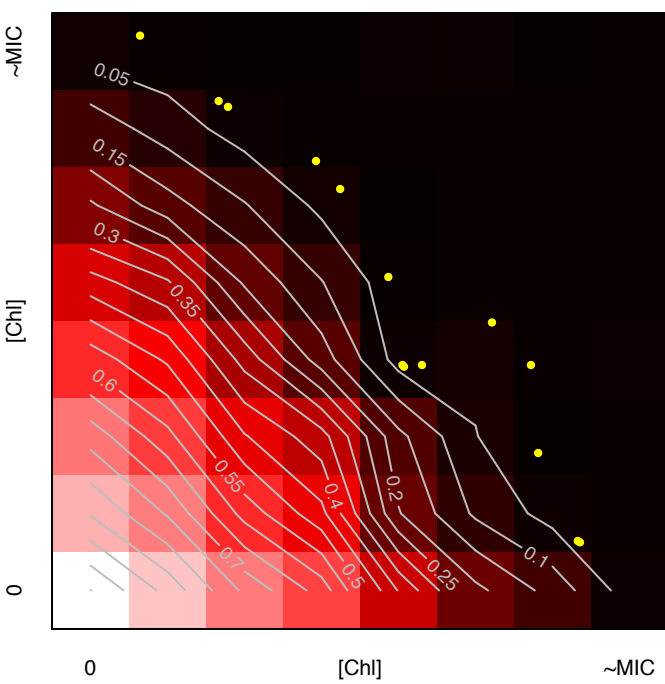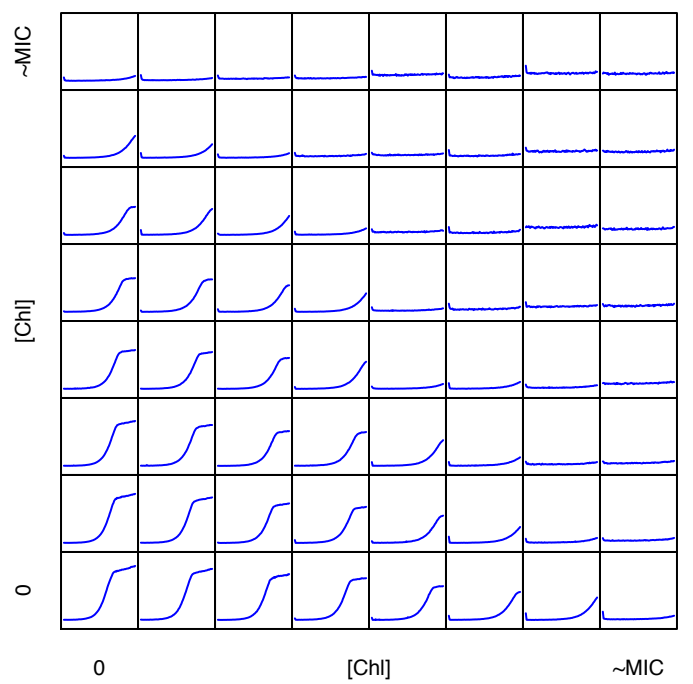

$\alpha = 1.081459$ 

lxxxii

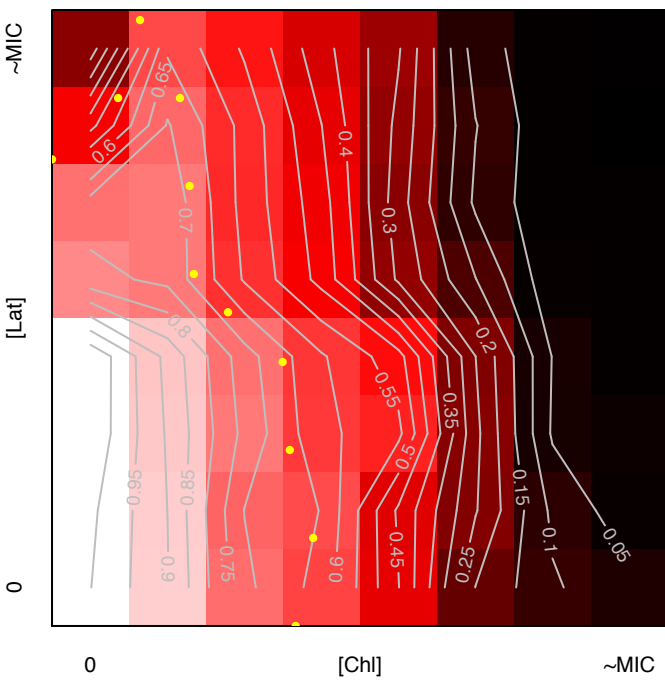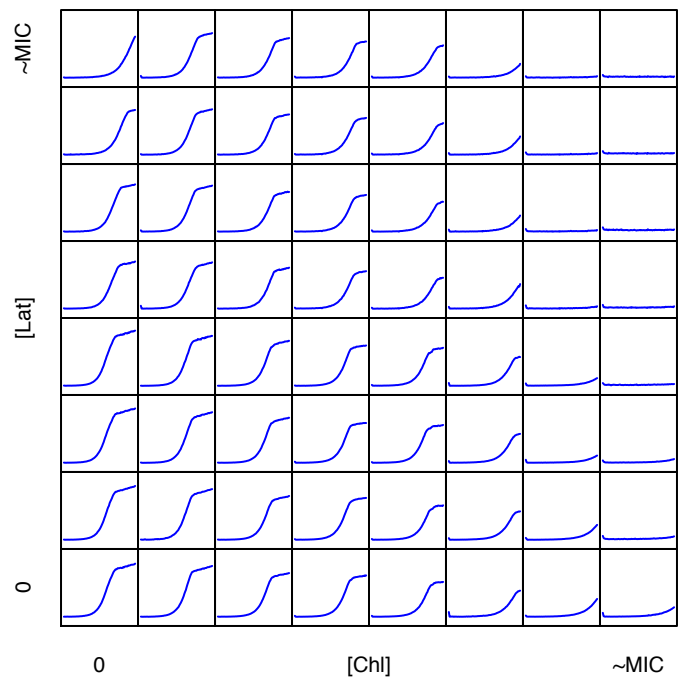 $\alpha = 1.292096$ 

lxxxiii

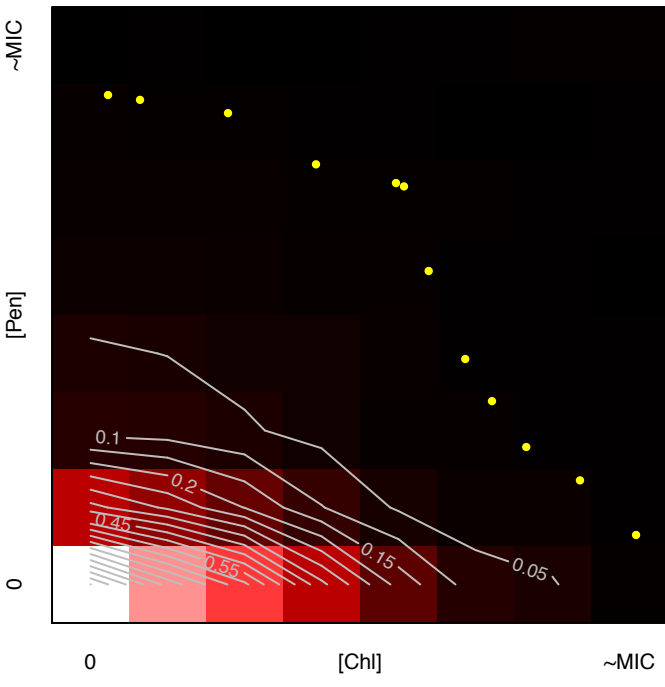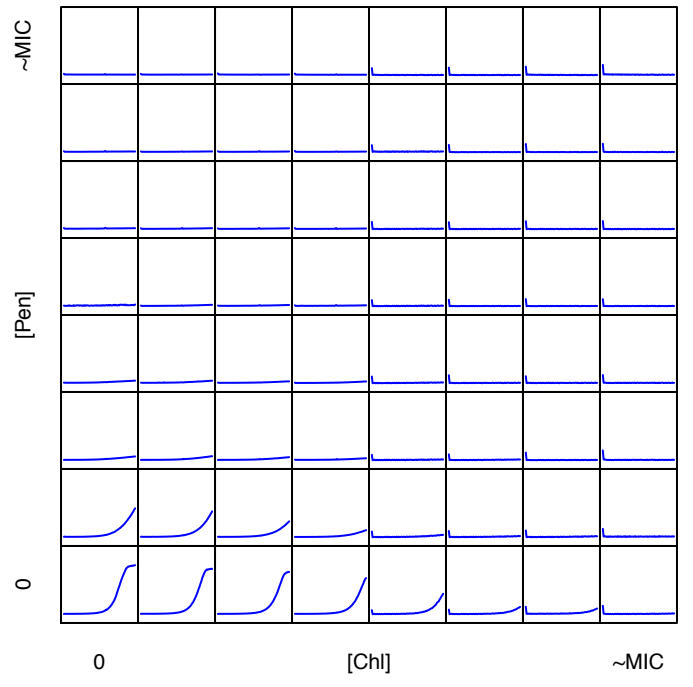 $\alpha = 0.5491908$ 

lxxxiiii

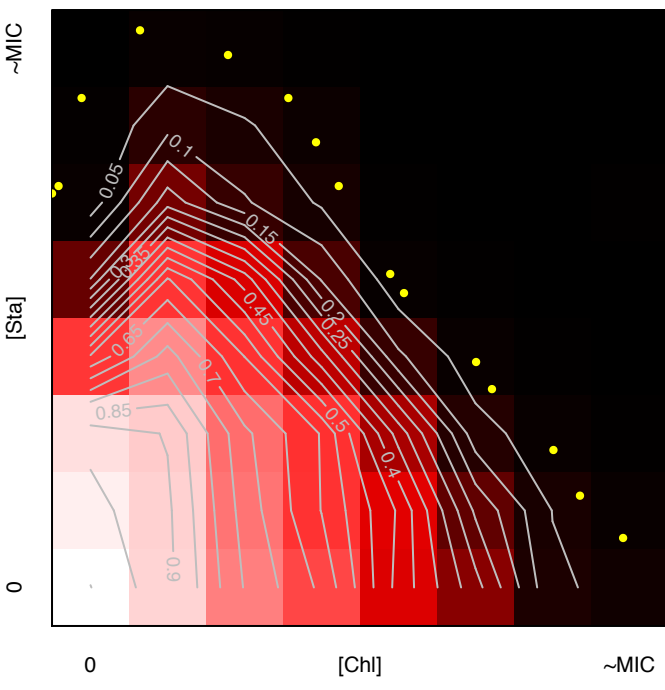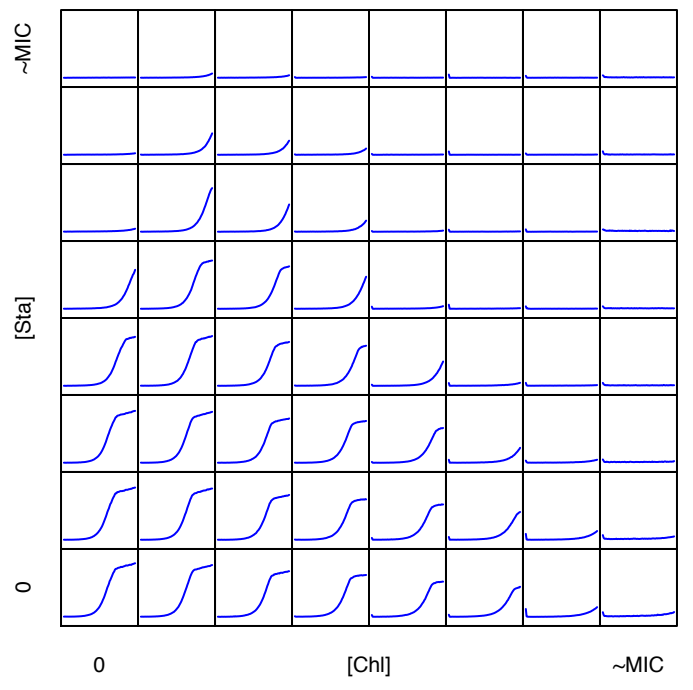 $\alpha = 0.6244599$ 

lxxxv

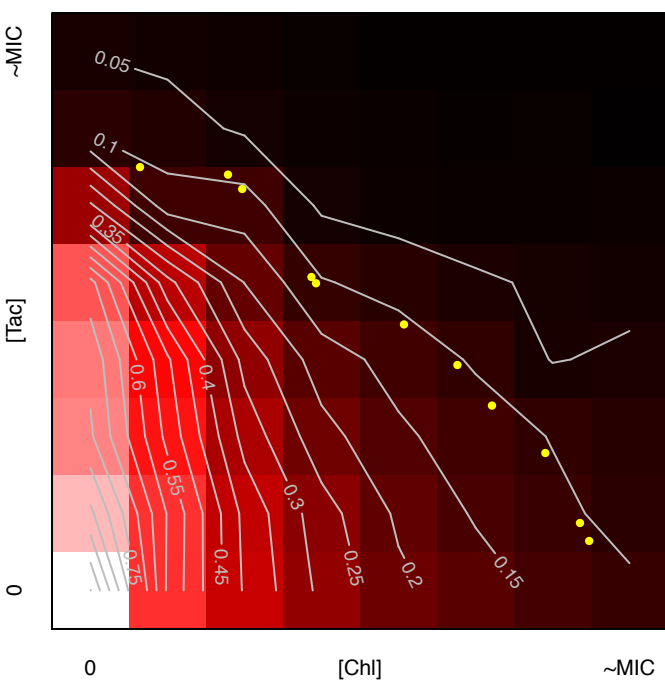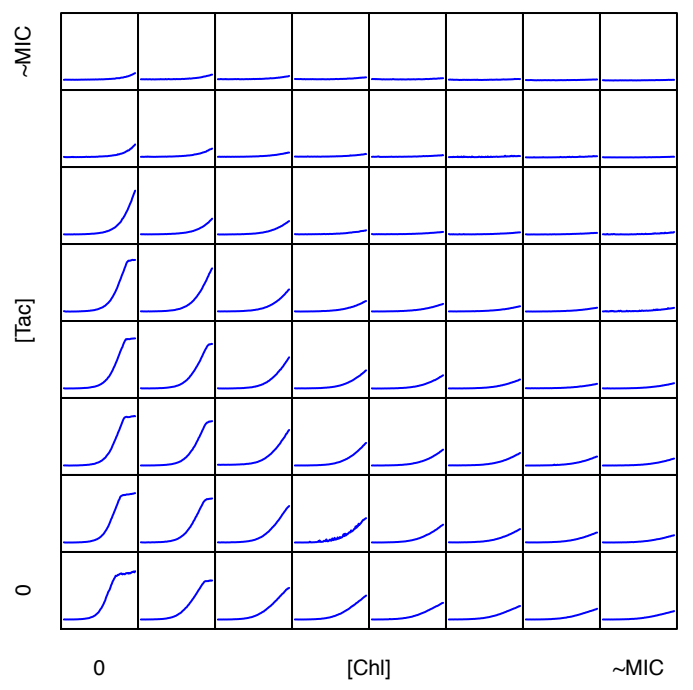

$\alpha = 1.960505$

lxxxv

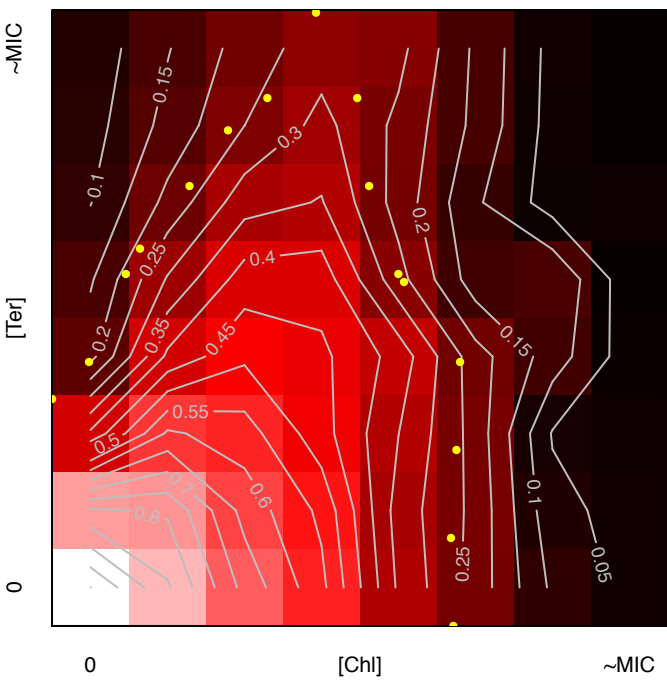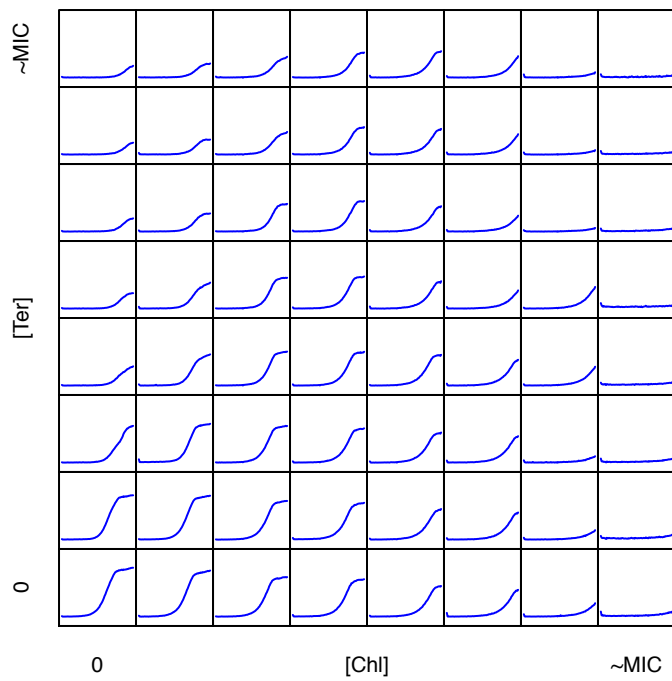

$\alpha = 0.2377447$

lxxxvi

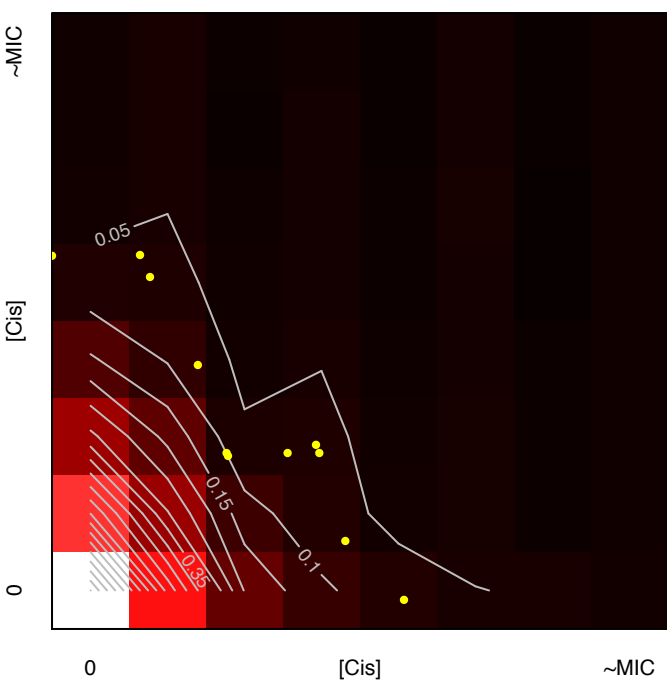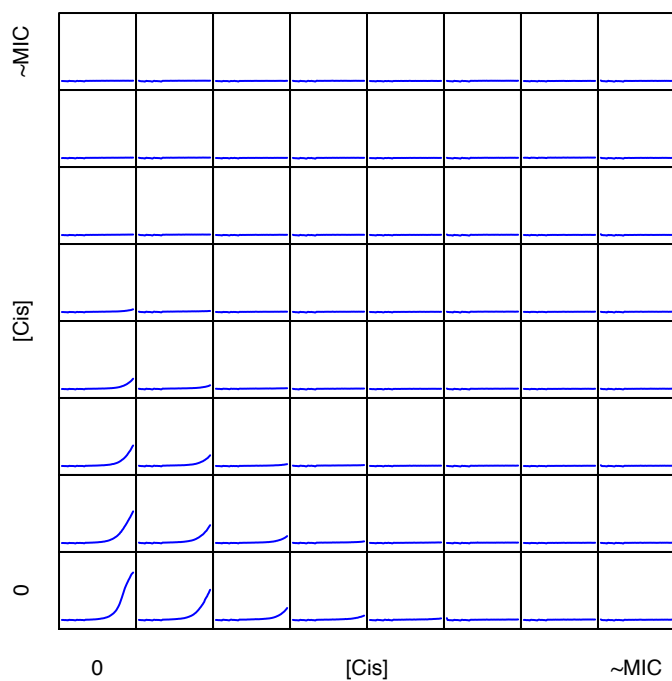

$\alpha = 0.812524$

lxxxvii

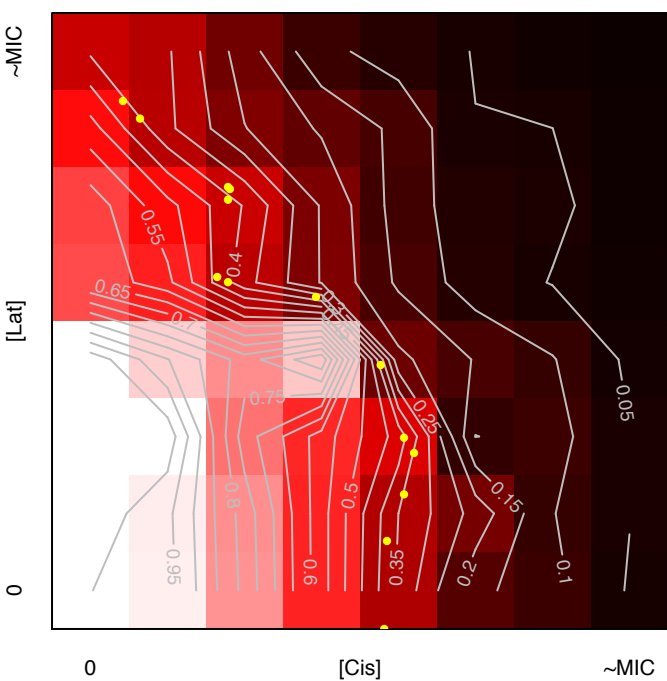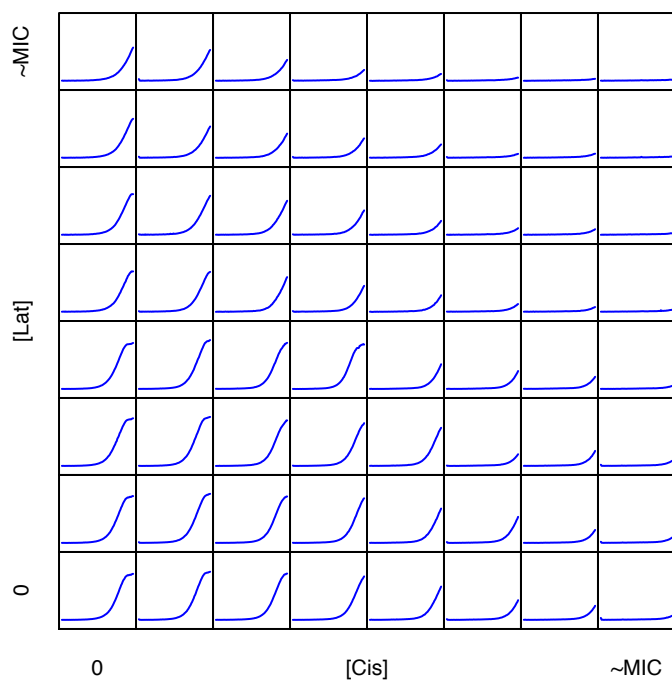

$\alpha = 2.042424$

lxxxviii

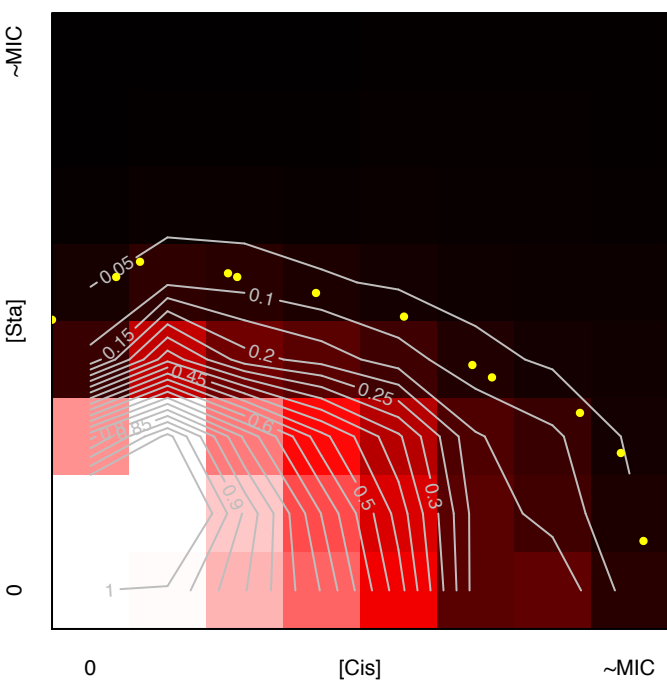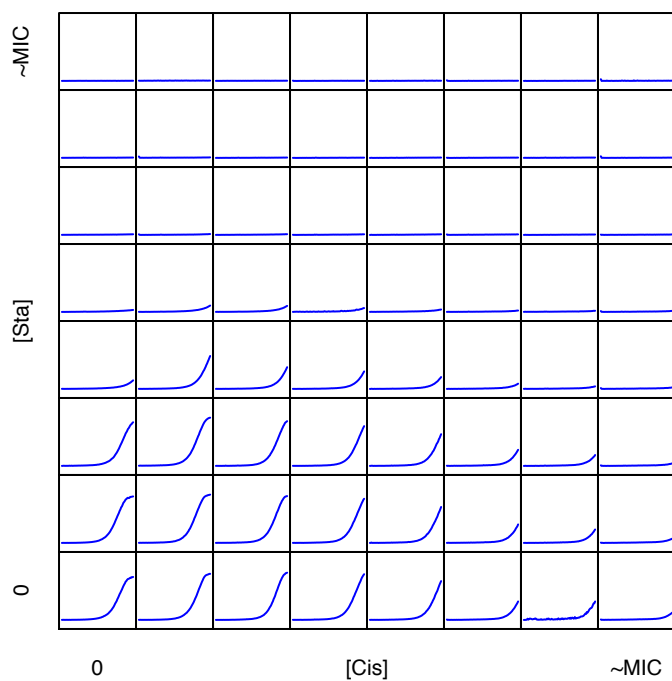

$\alpha = -1.278747$

lxxxix

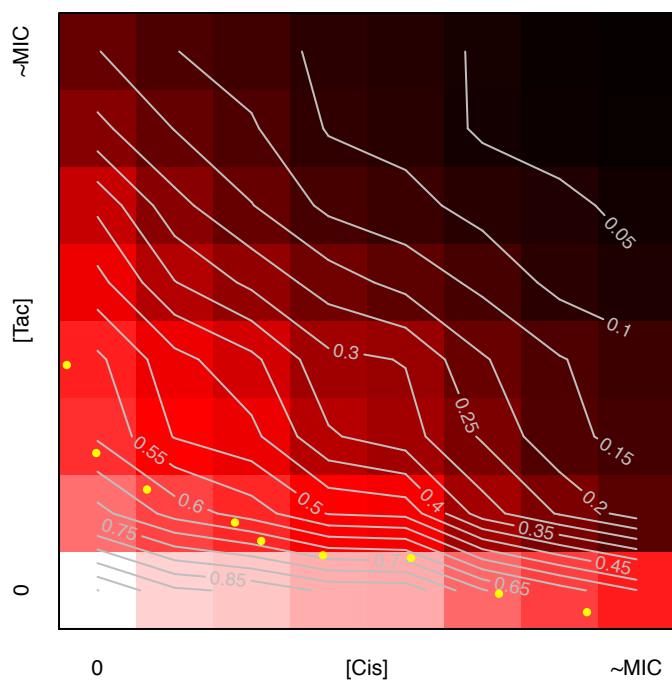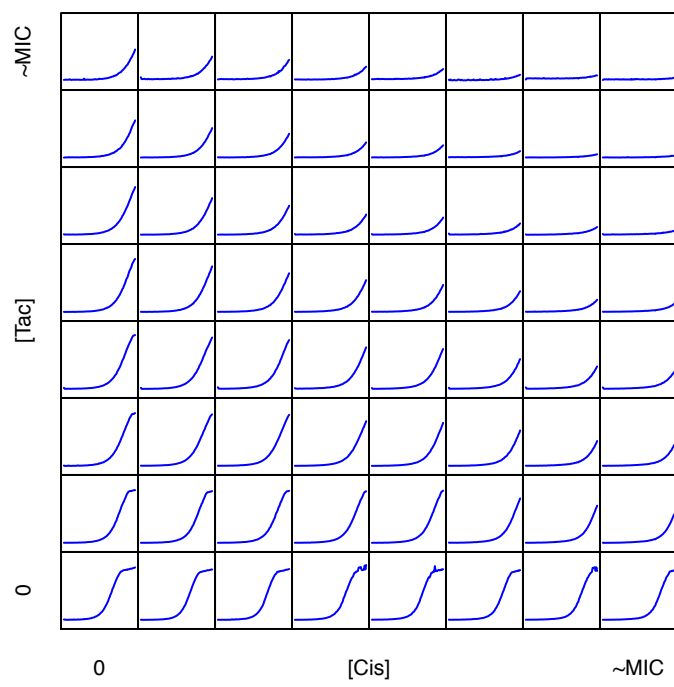

$\alpha = -0.5585719$

xc

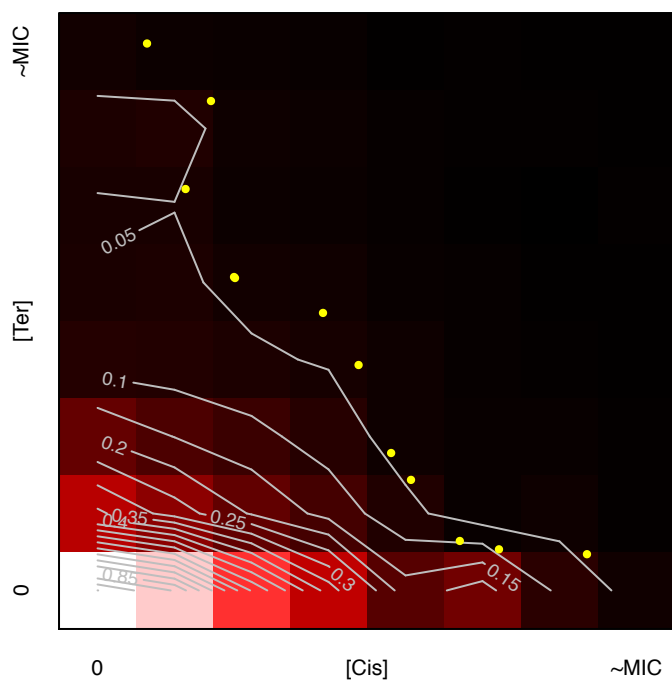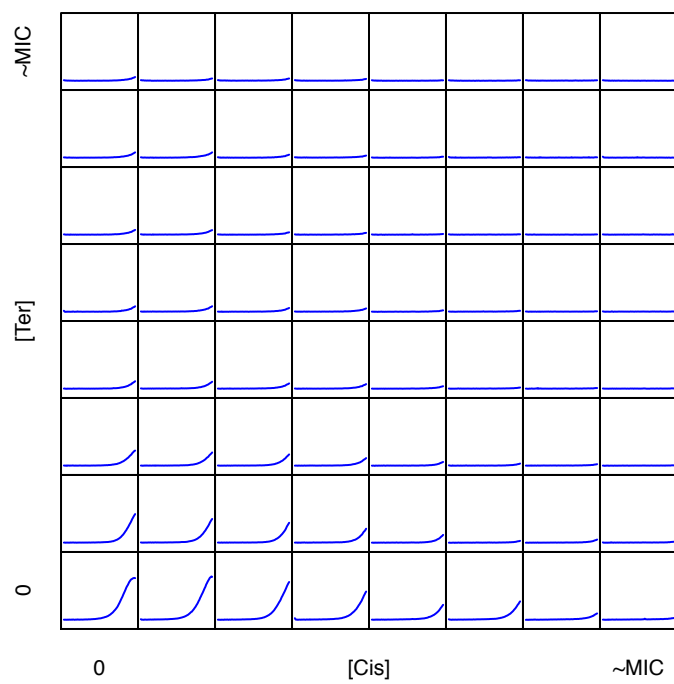

$\alpha = 1.03216$

xcii

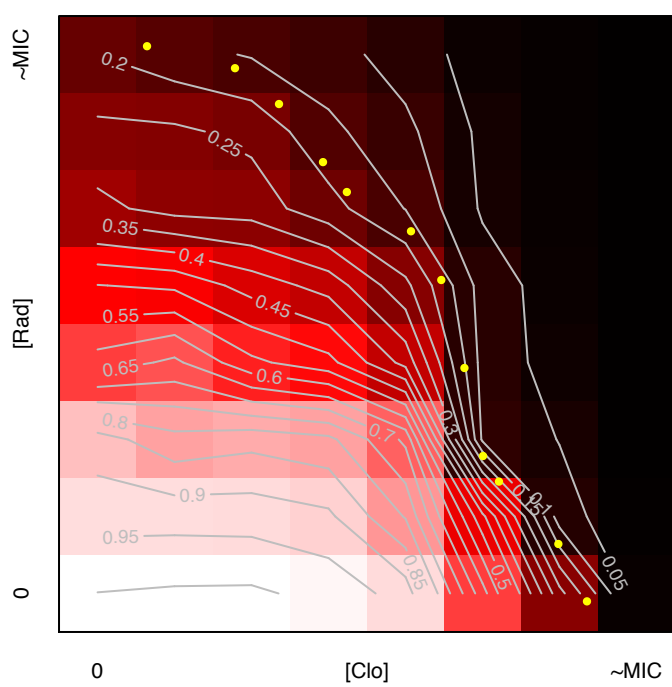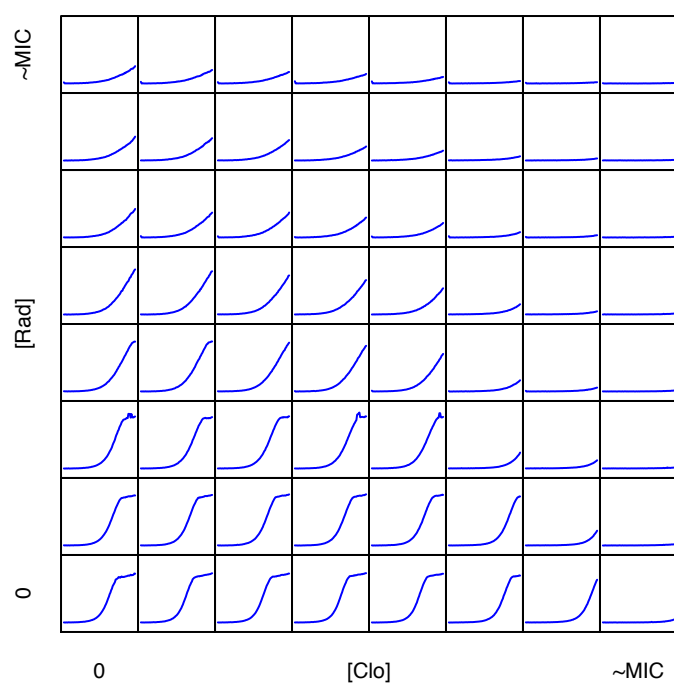

$\alpha = -0.2230583$

xciii

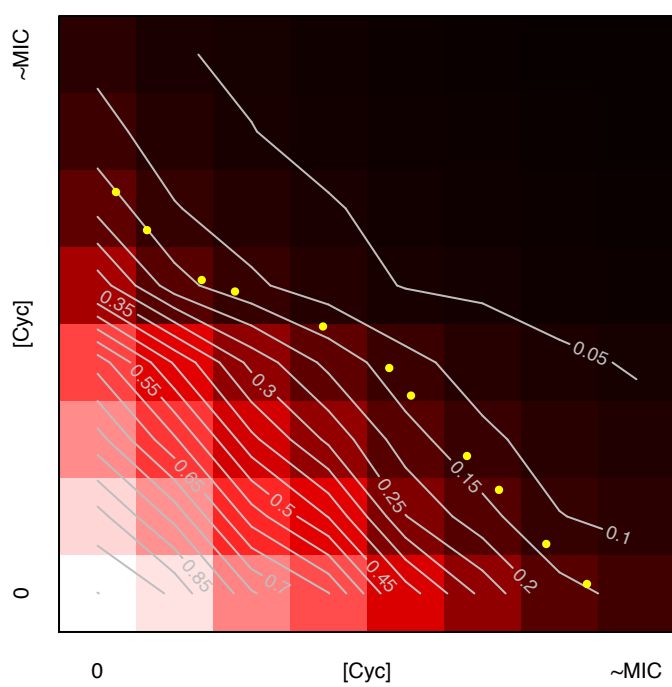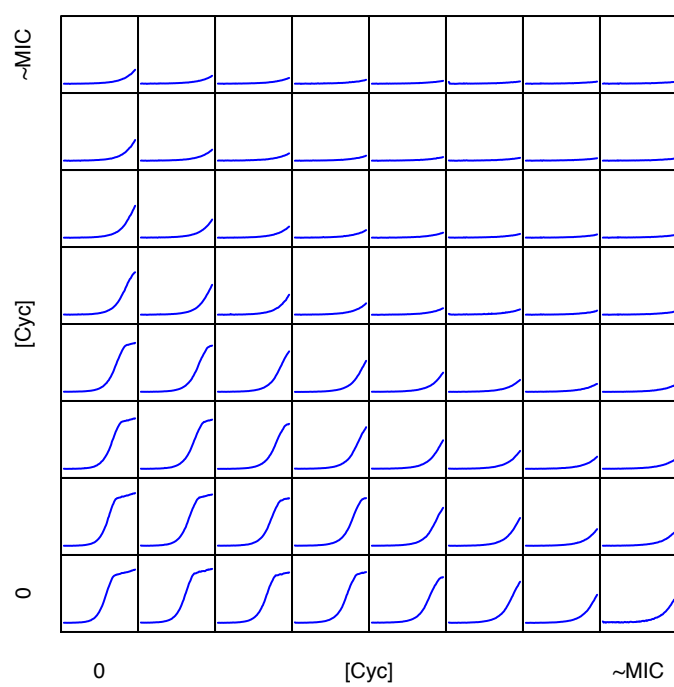

$\alpha = 2.349379$

XCiii

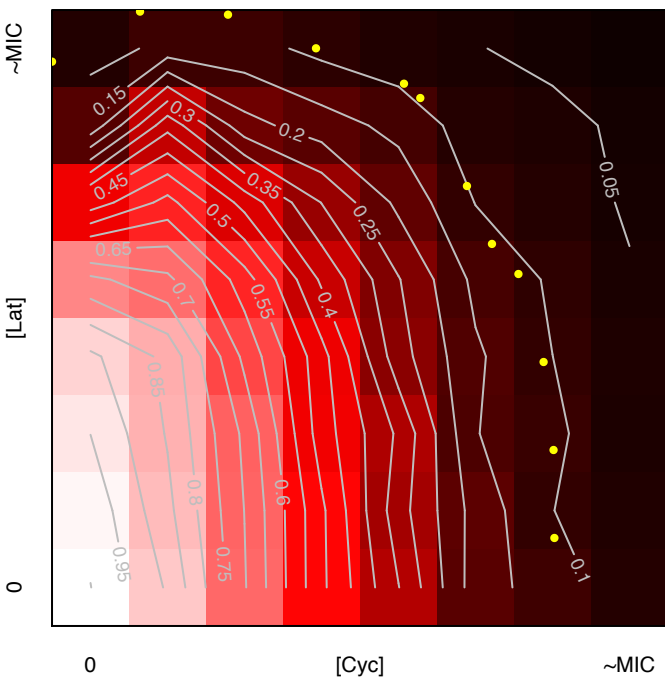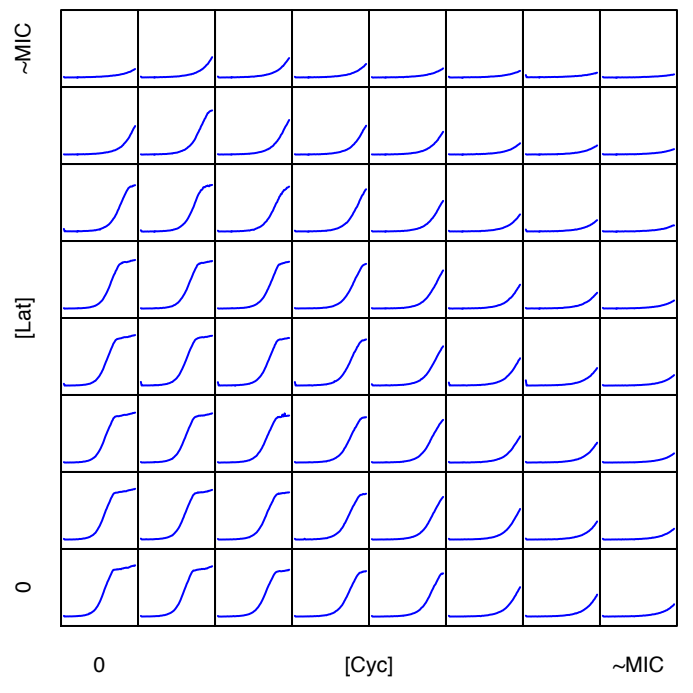

$\alpha = -0.1694487$

XCiv

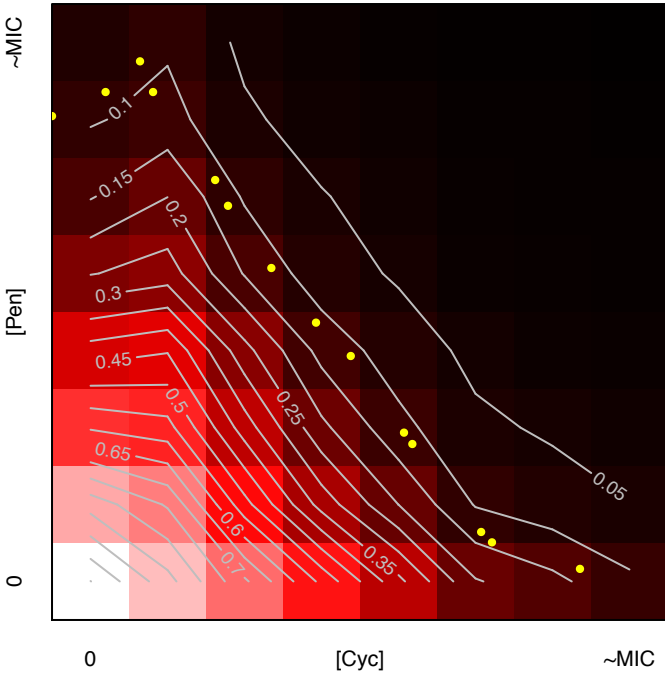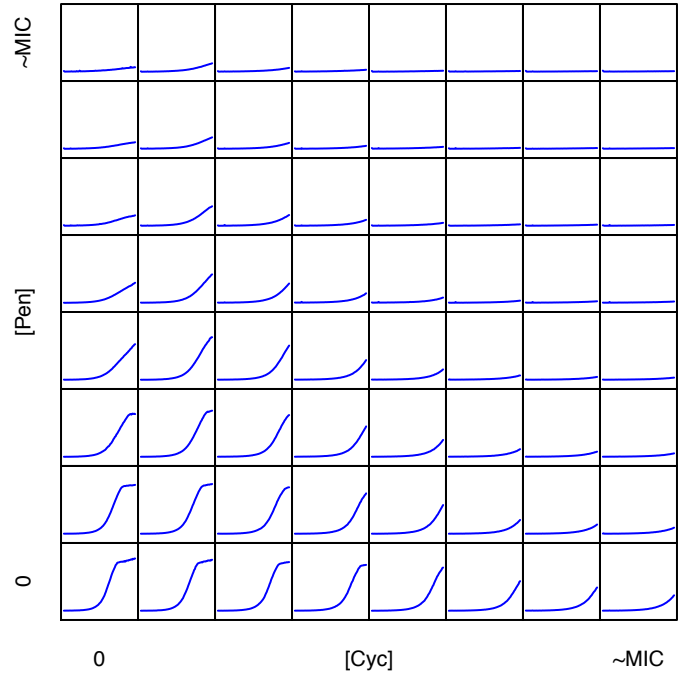

$\alpha = 2.700311$

XCv

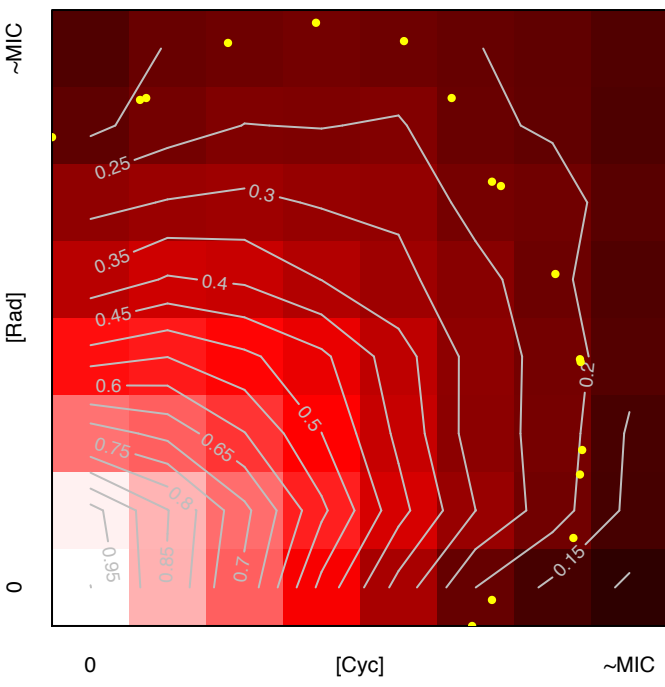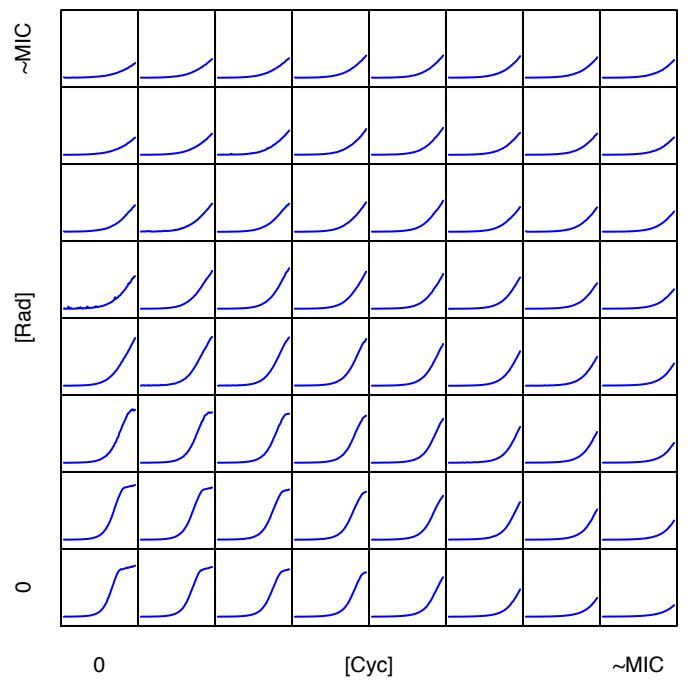

$\alpha = 1.608227$

XCvi

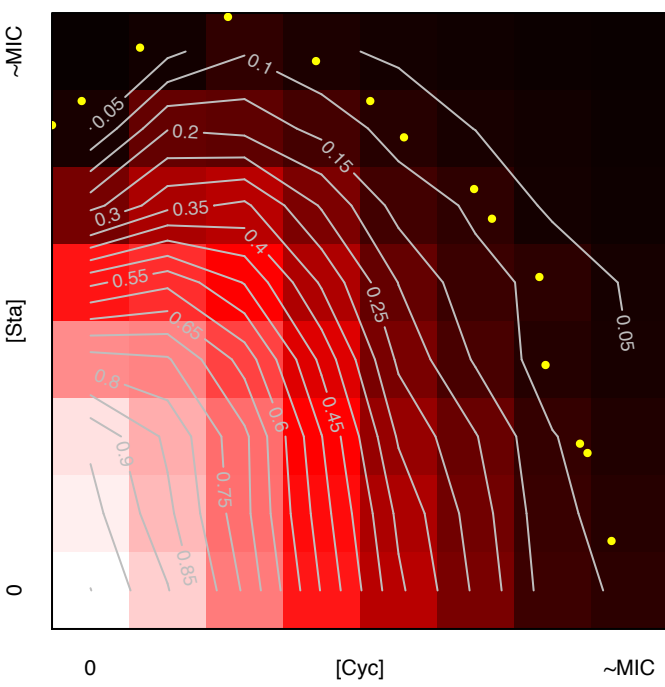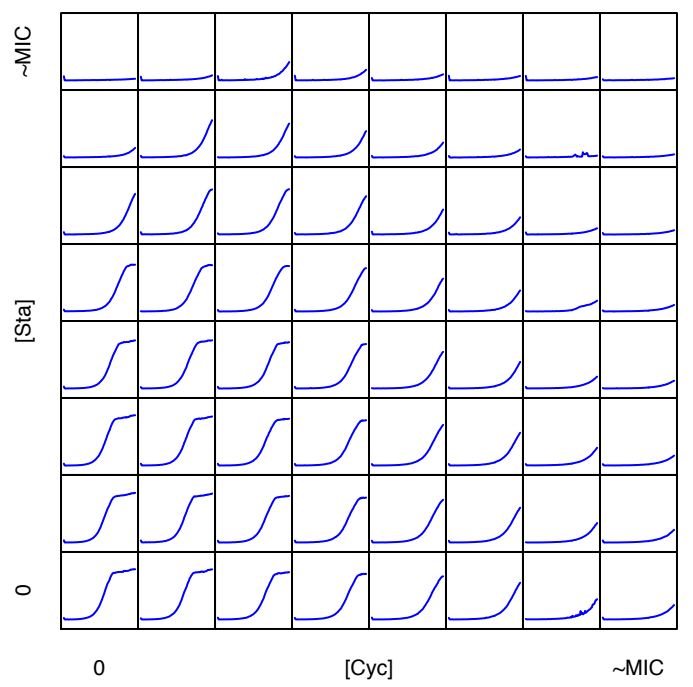



$\alpha = -1.988403$

xcvii

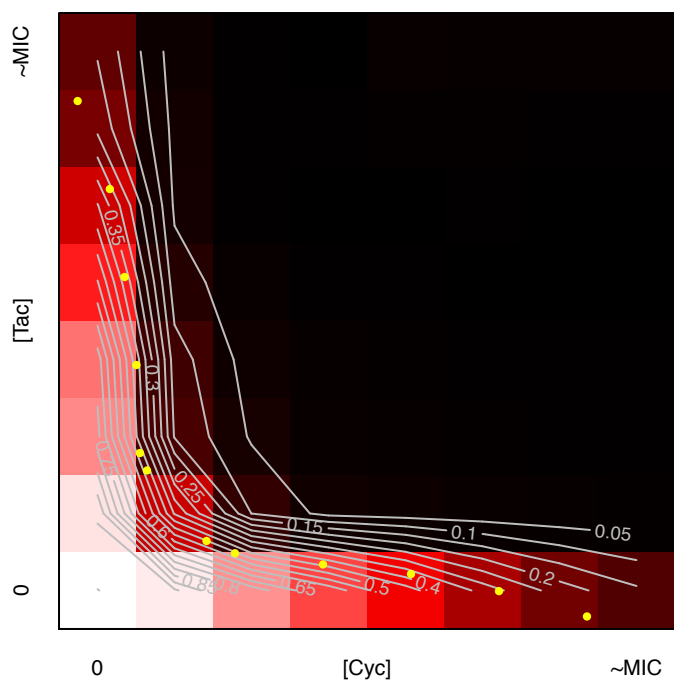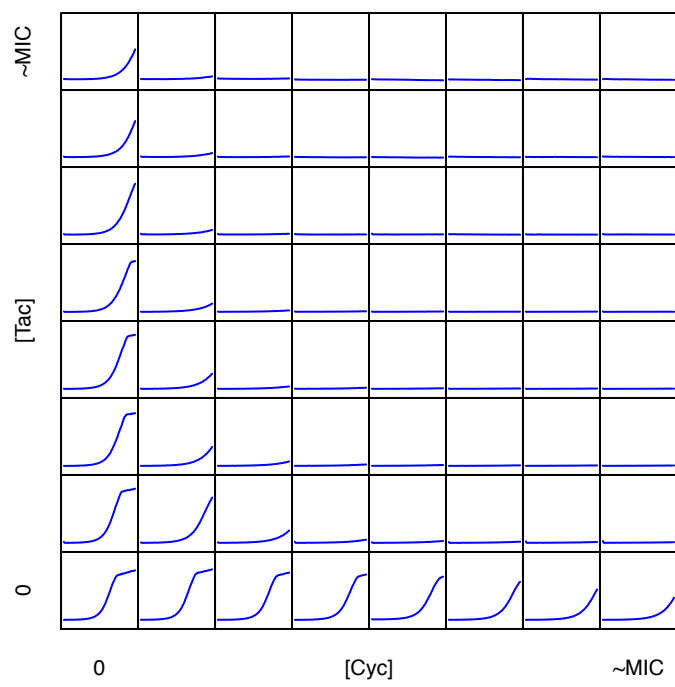

$\alpha = -0.1545347$

xcviii

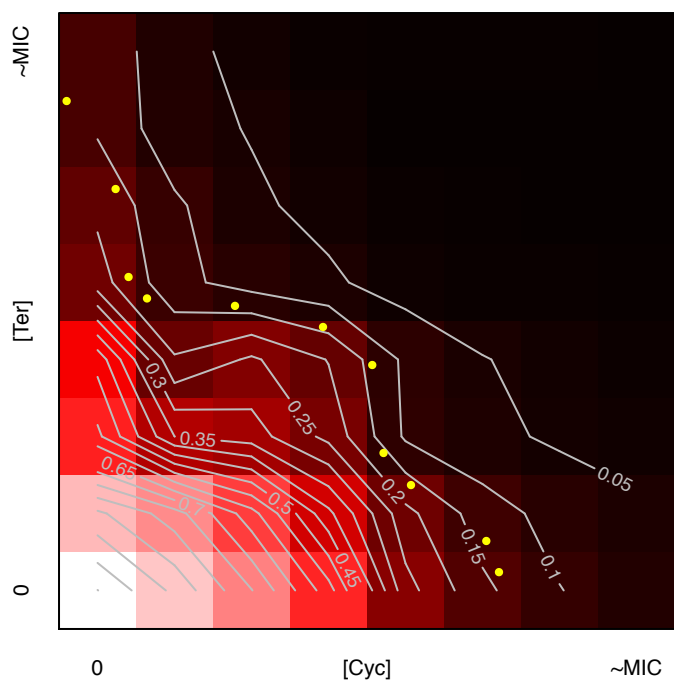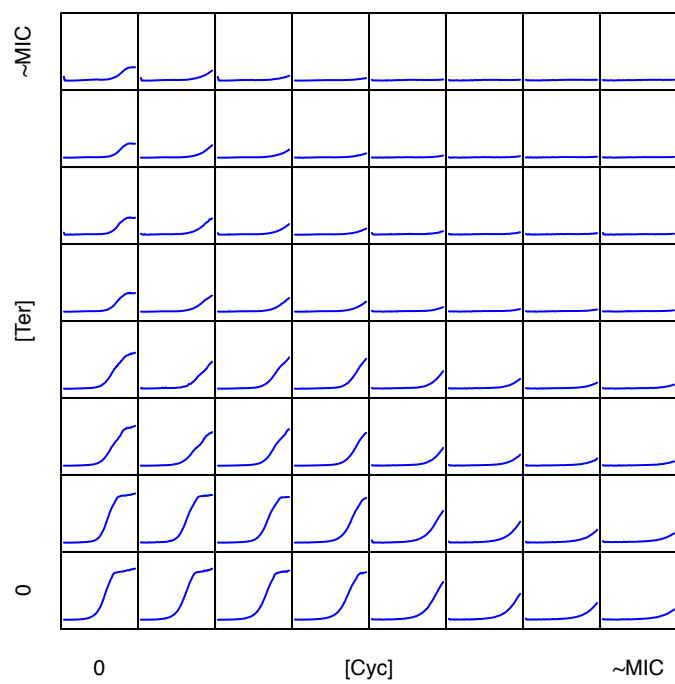

$\alpha = 0.1812499$

xcix

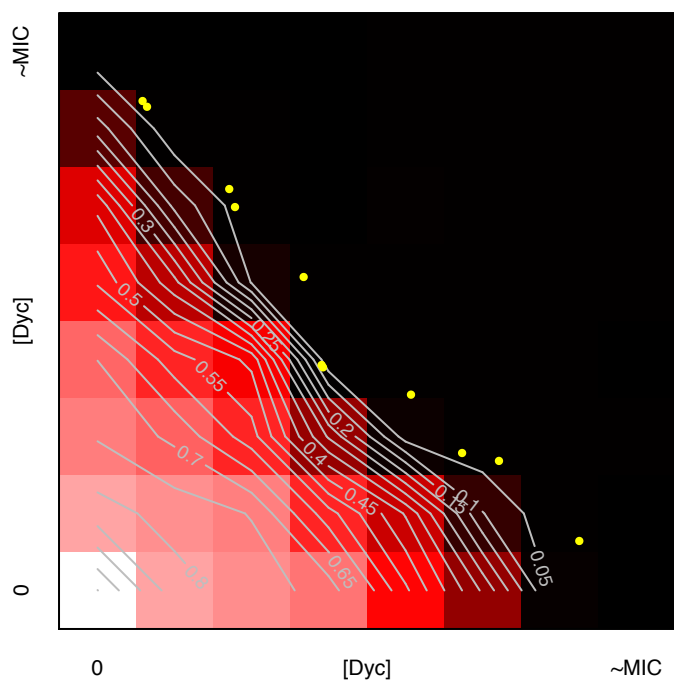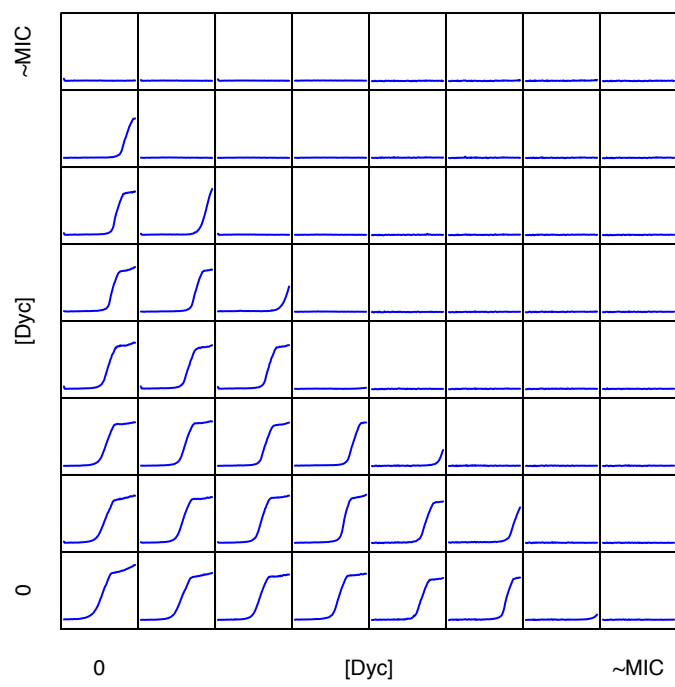

$\alpha = 1.184982$

C

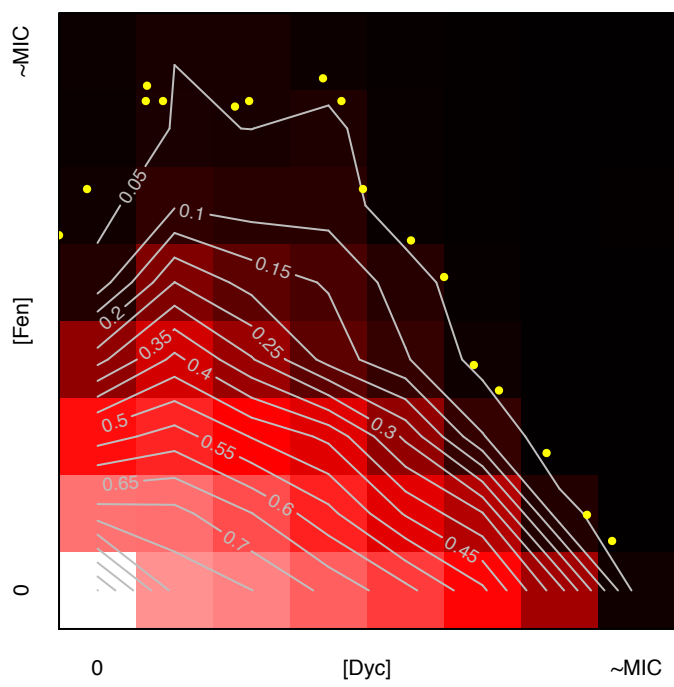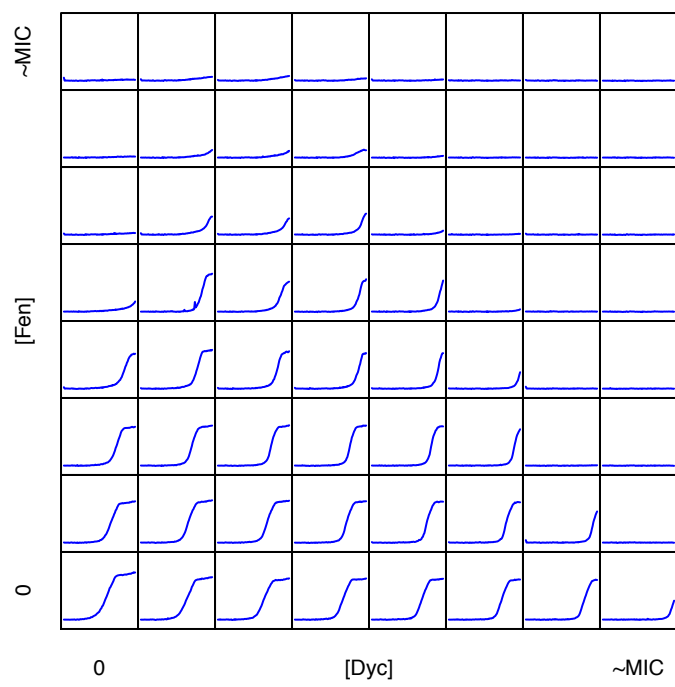

$\alpha = 0.8565137$

ci

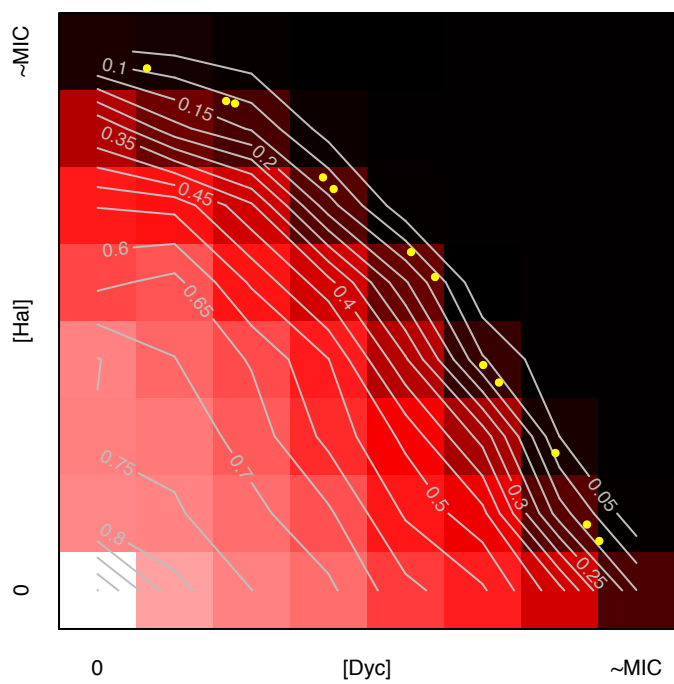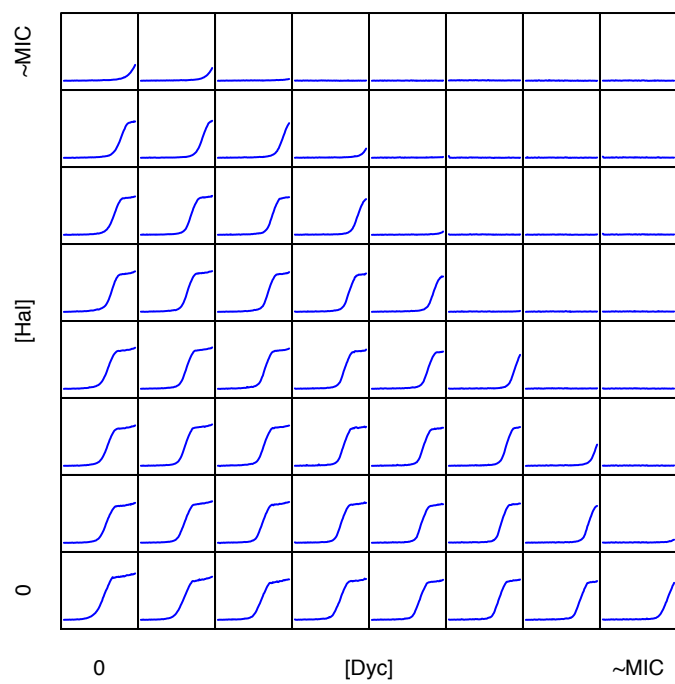

$\alpha = -1.913129$

cii

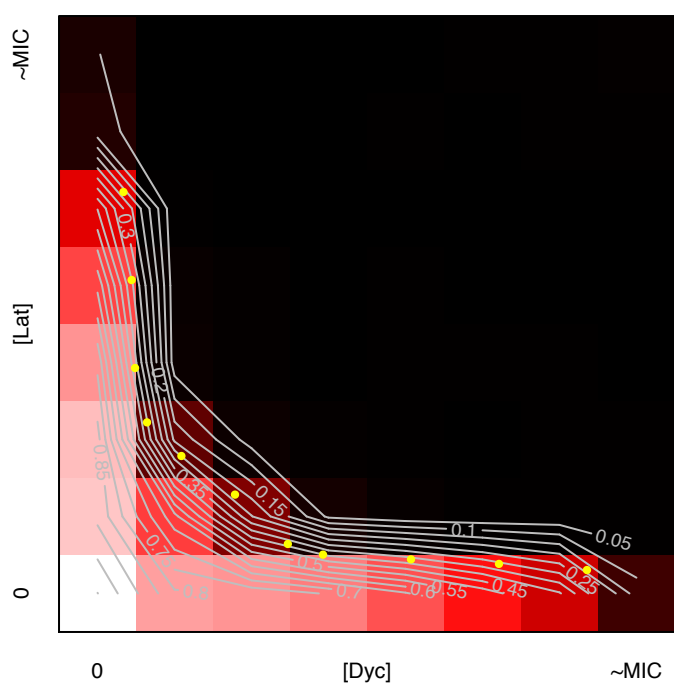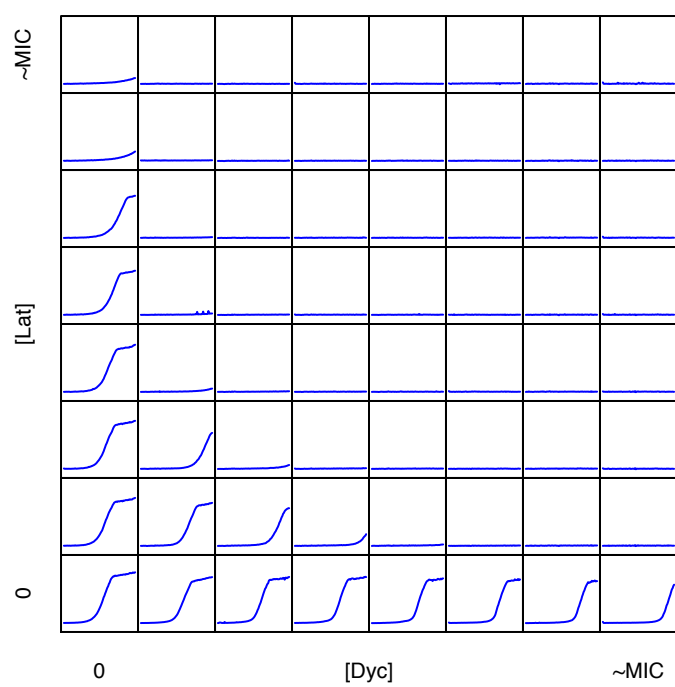

$\alpha = -1.172866$

ciii

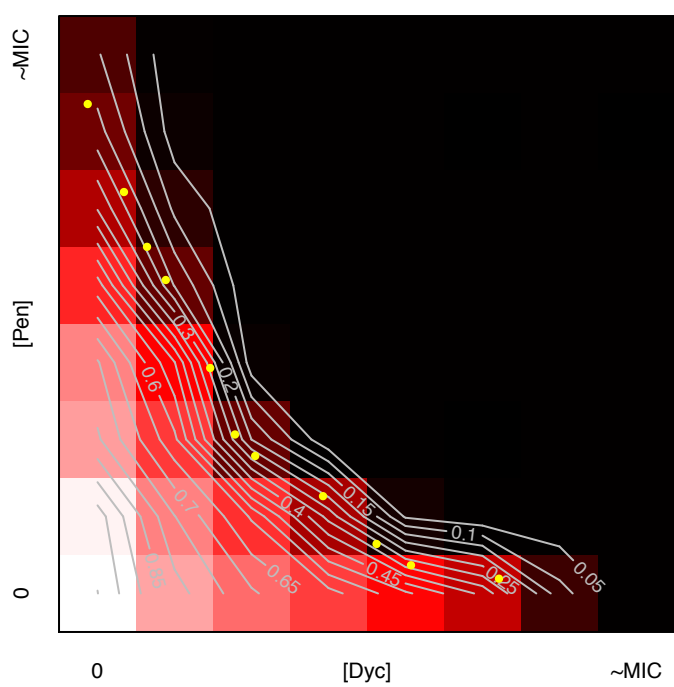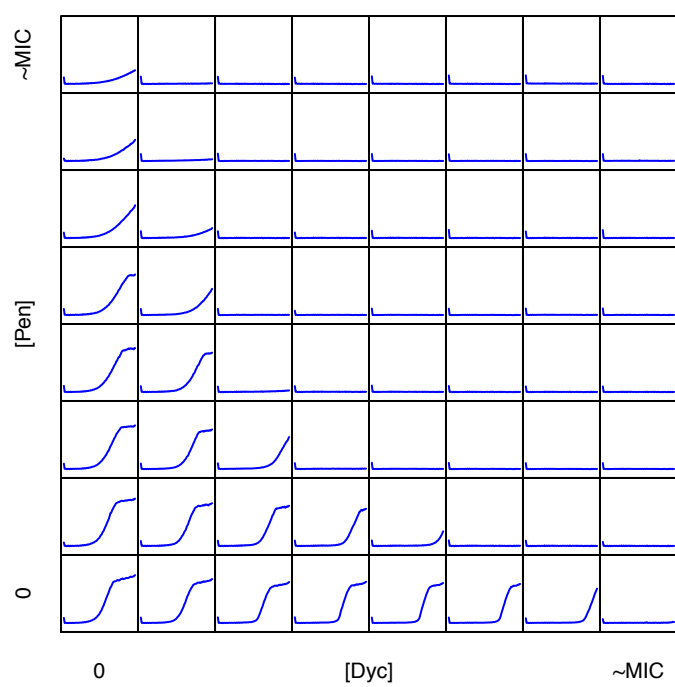

$\alpha = -0.6506027$

civ

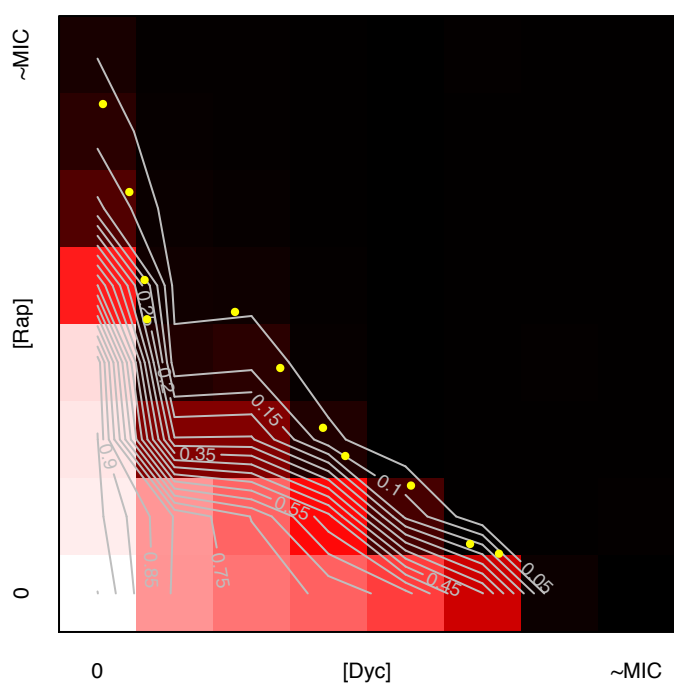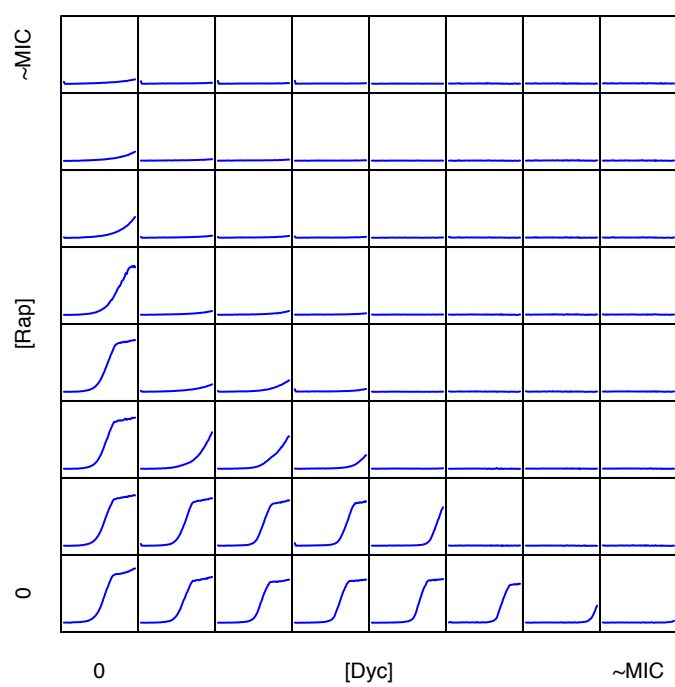

$\alpha = -1.433022$

CV

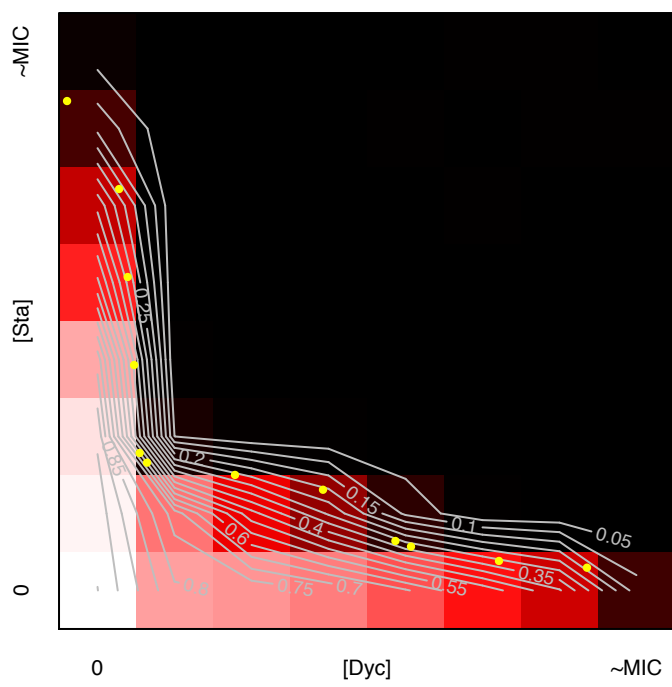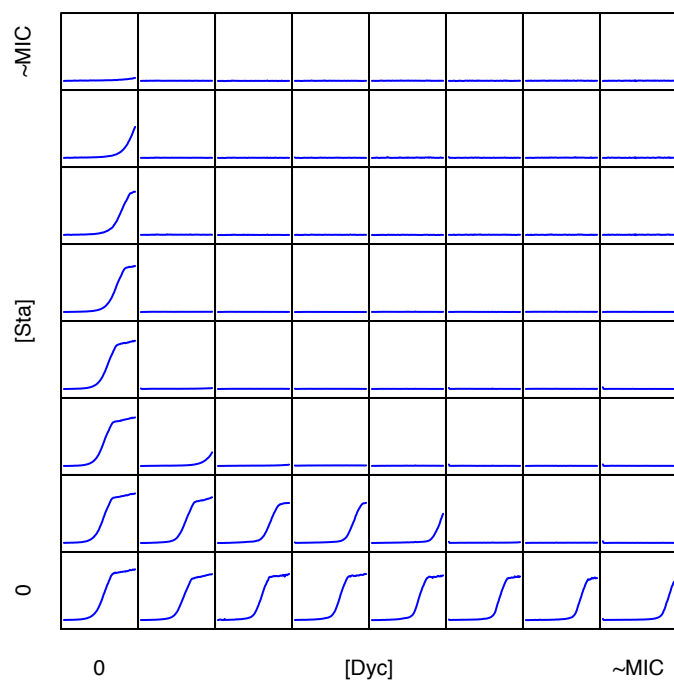

$\alpha = 0.0980357$

CVi

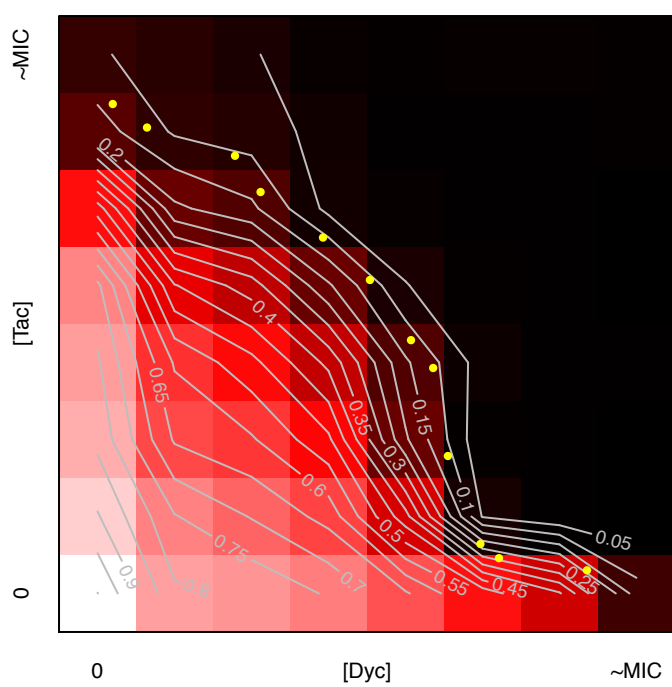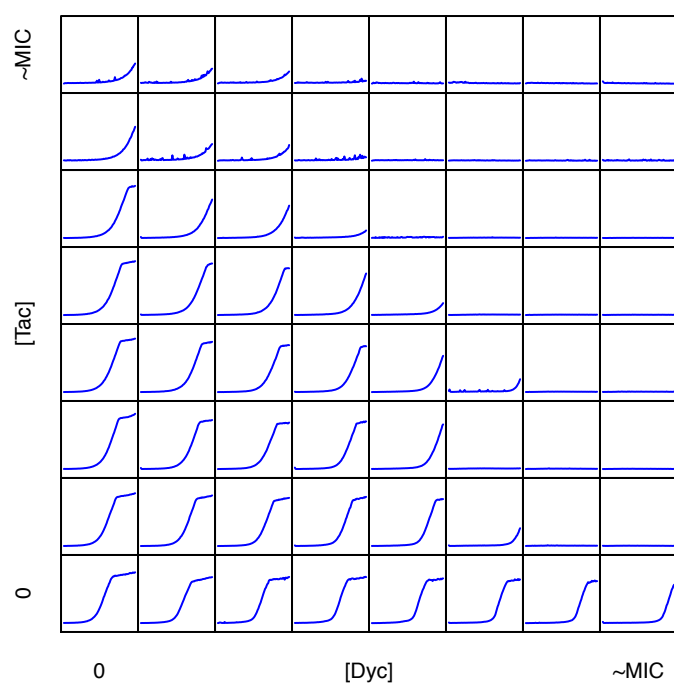

$\alpha = -1.661215$

CVii

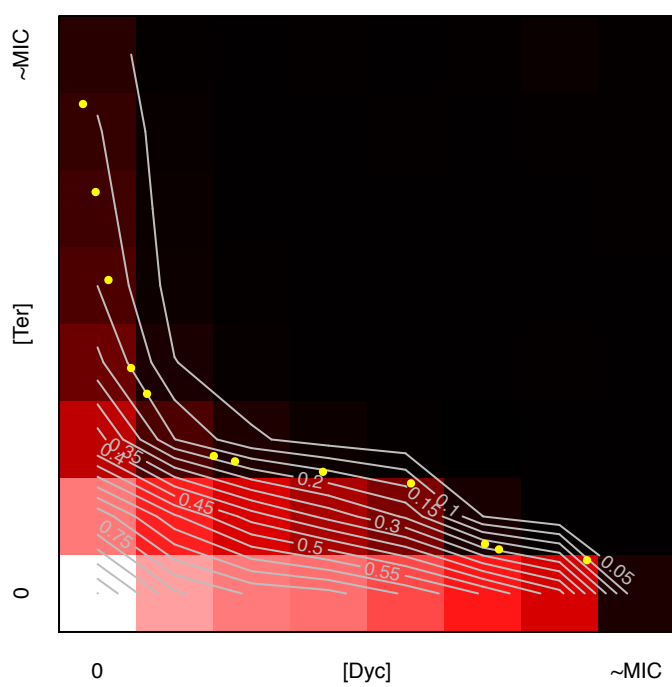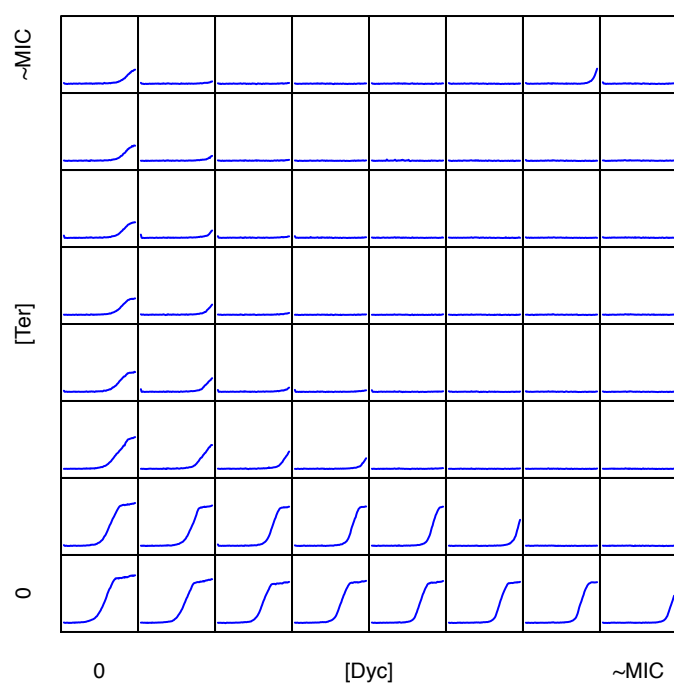

$\alpha = 0.7744981$

CViii

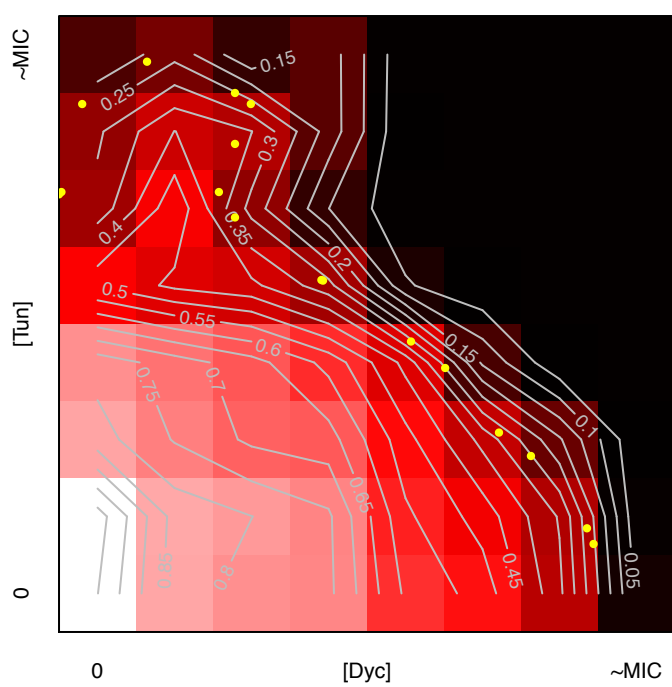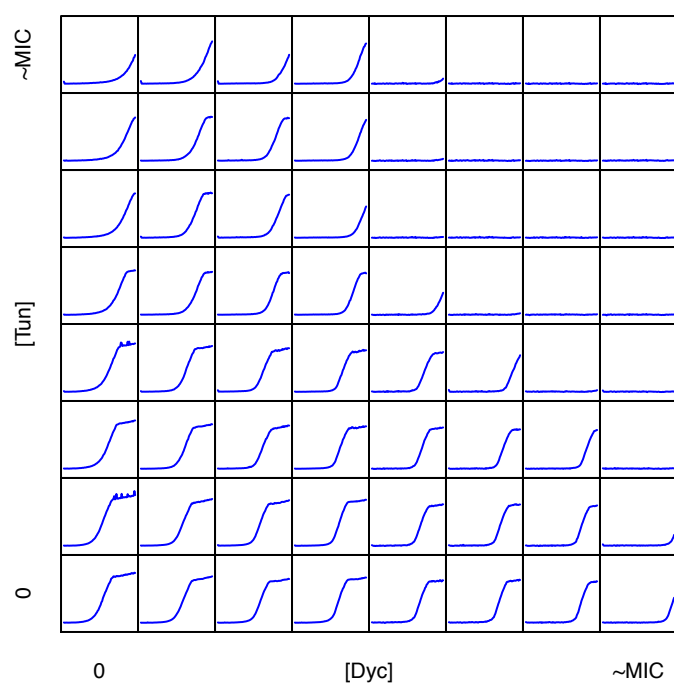

$\alpha = -0.1663256$

Cix

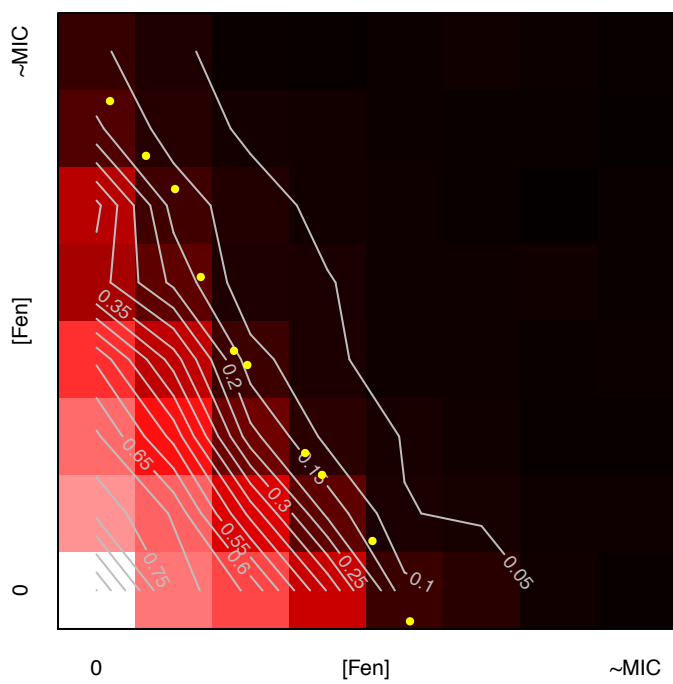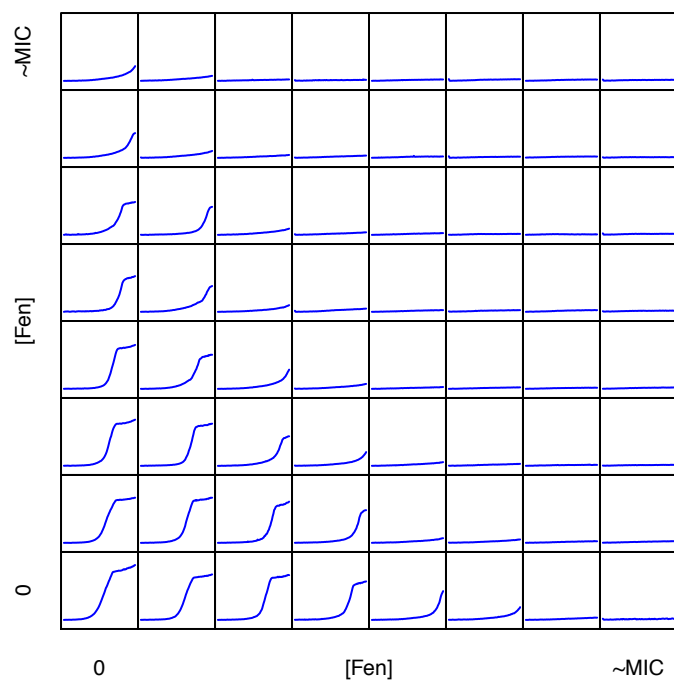

$\alpha = 0.2193959$

CX

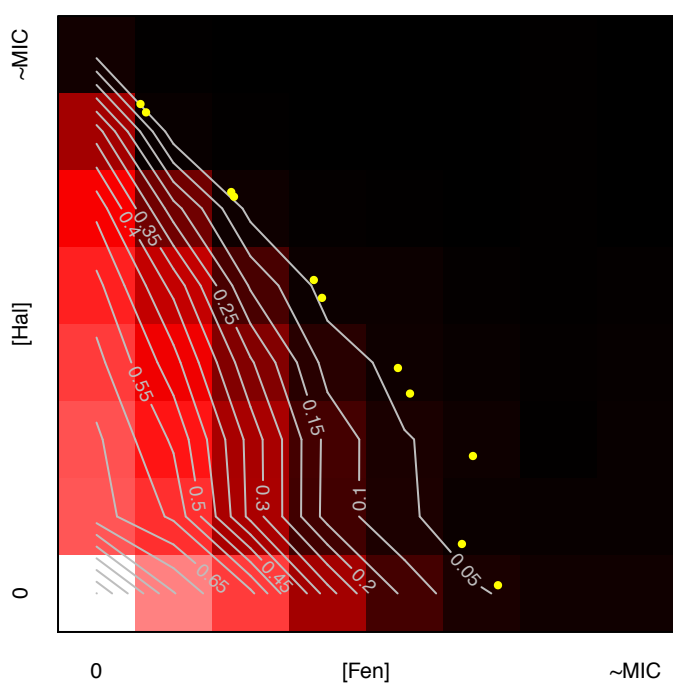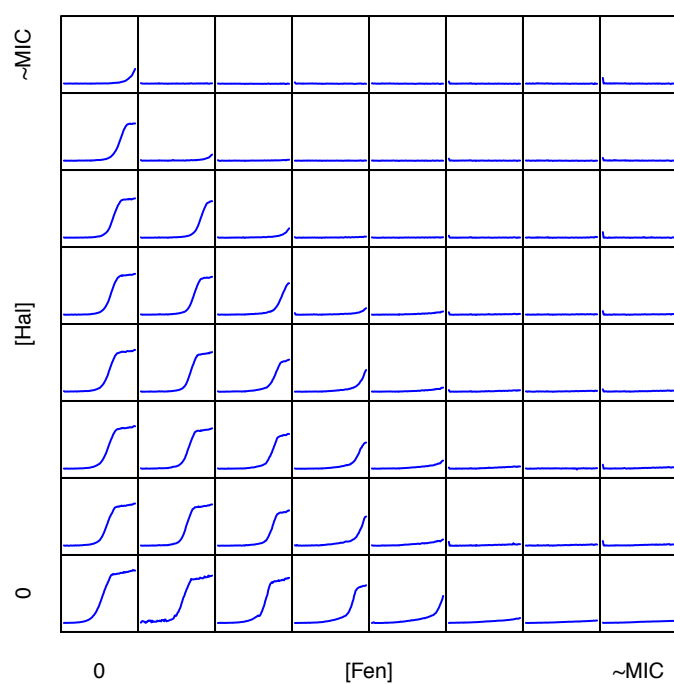

$\alpha = -1.830015$

Cxi

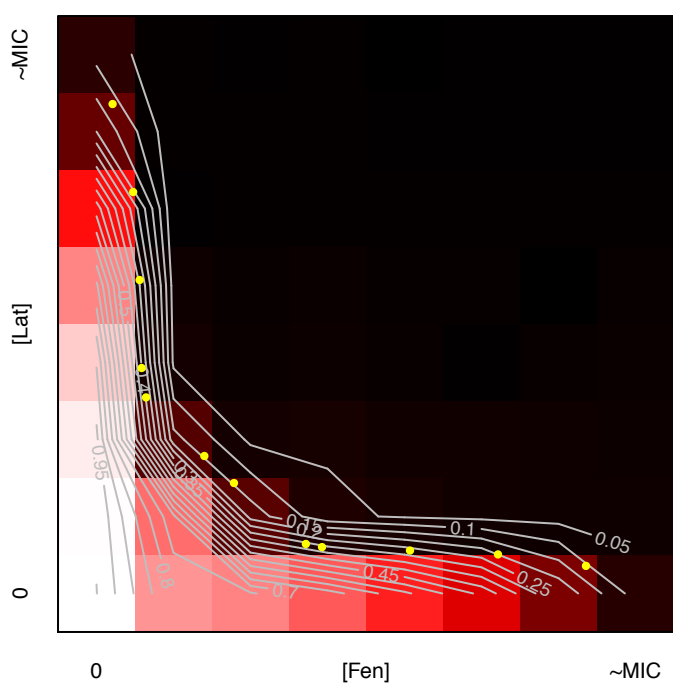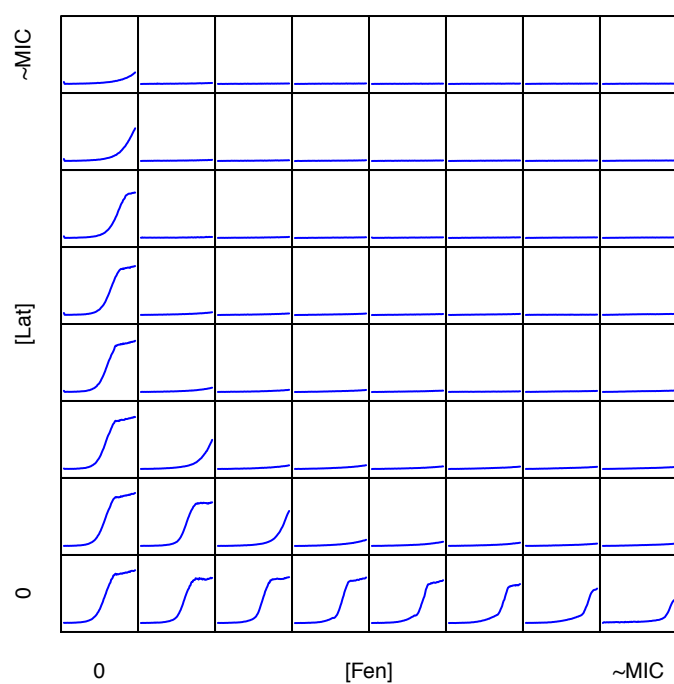

$\alpha = -1.853662$

Cxii

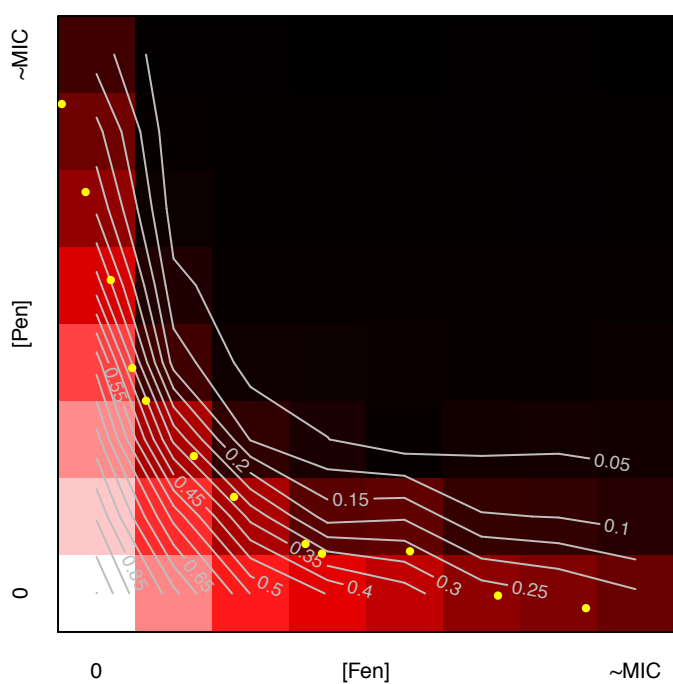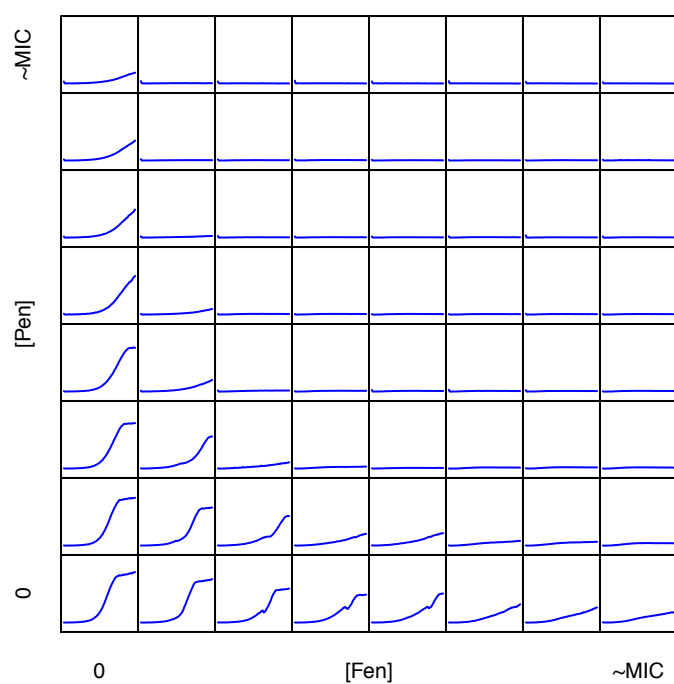

$\alpha = -0.9940276$

CXiii

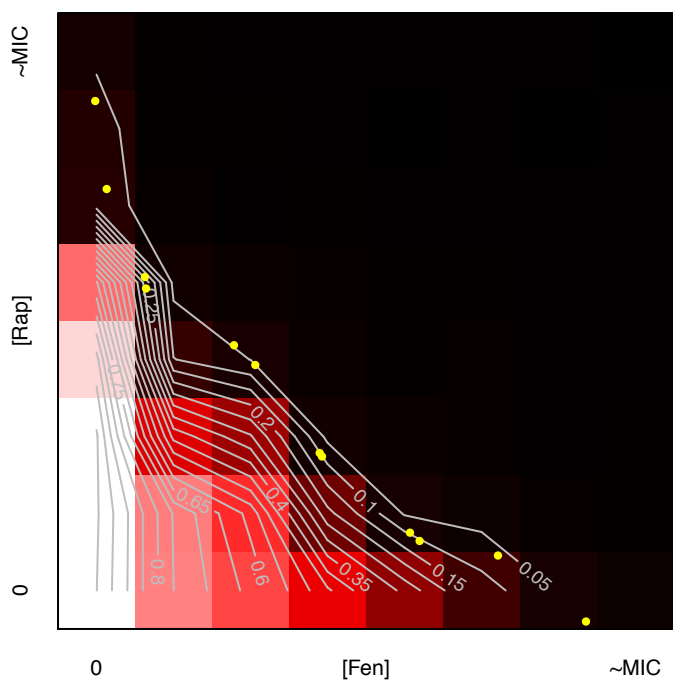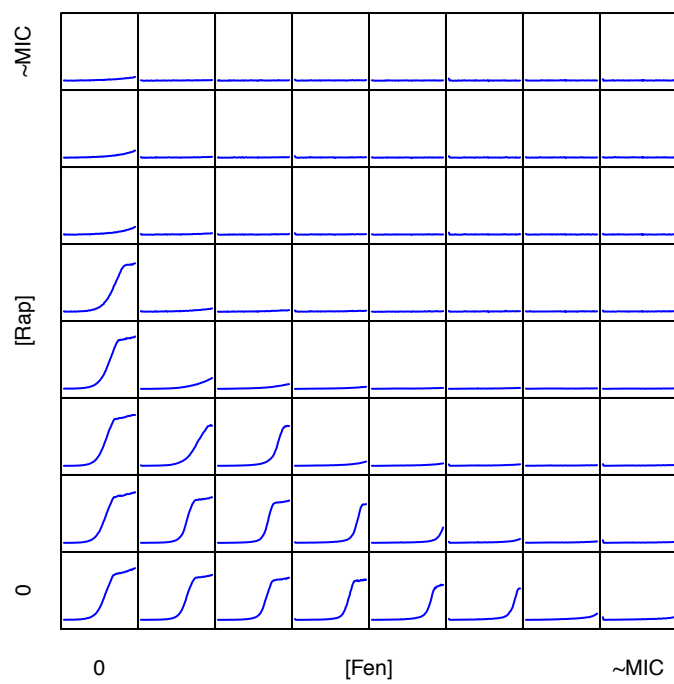

$\alpha = -1.435672$

CXiv

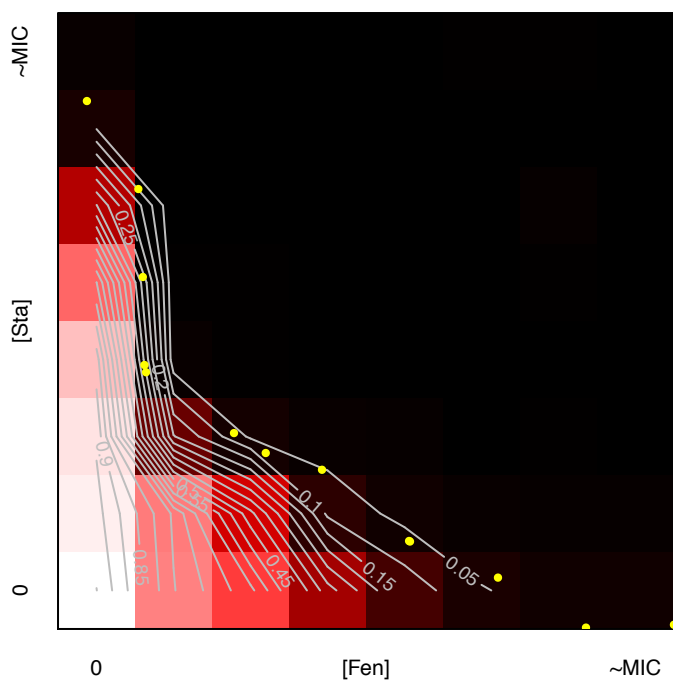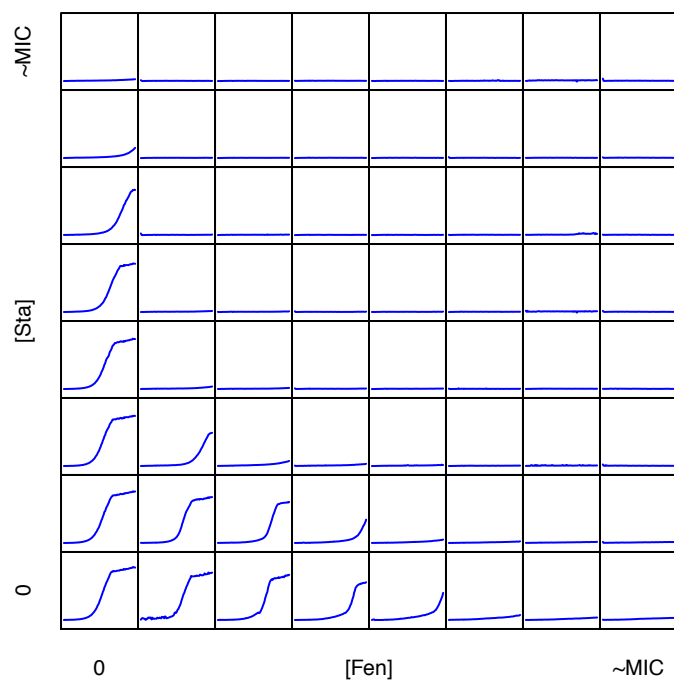

$\alpha = -0.9242625$

CXV

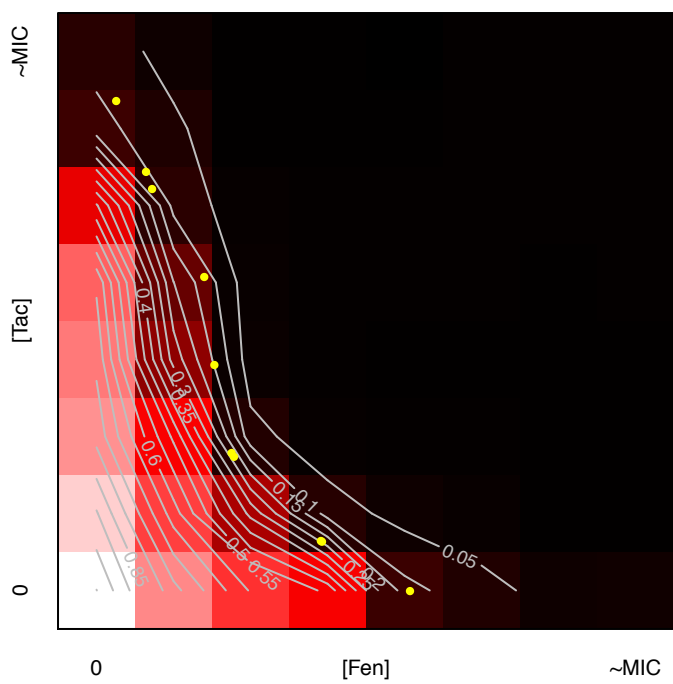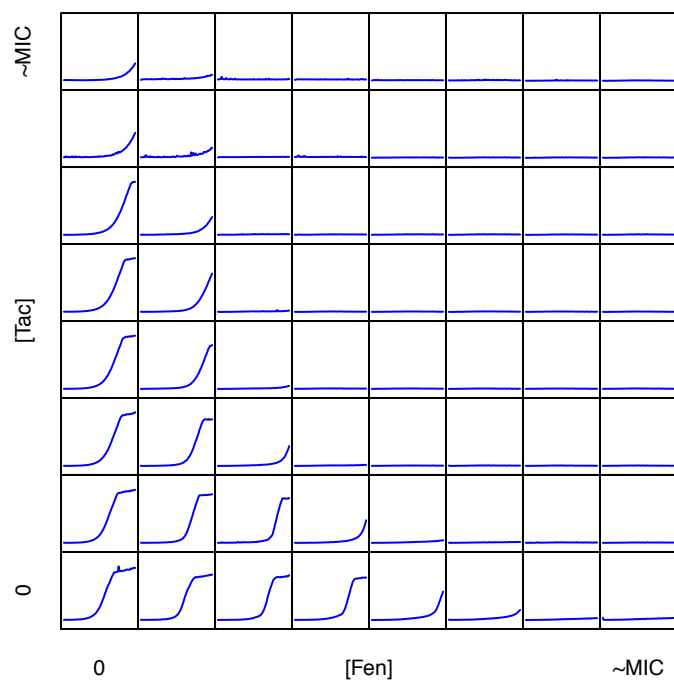

$\alpha = -1.047175$

CXvi

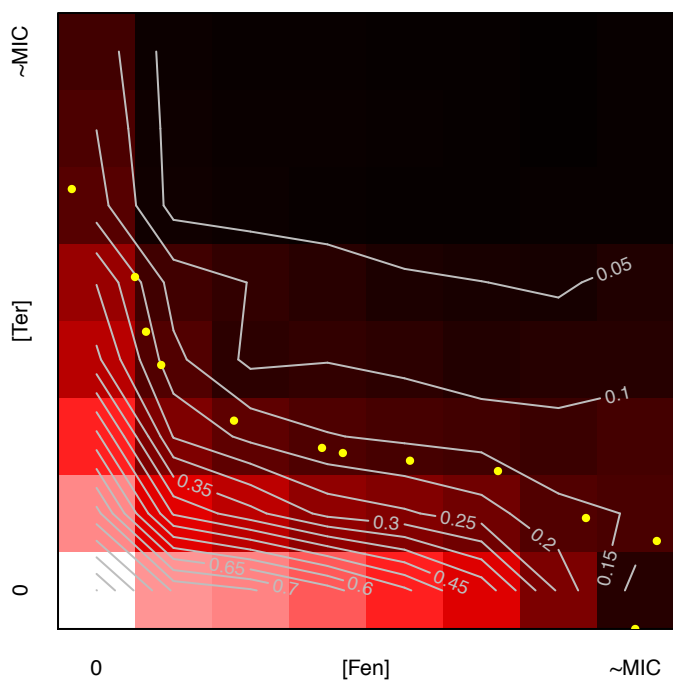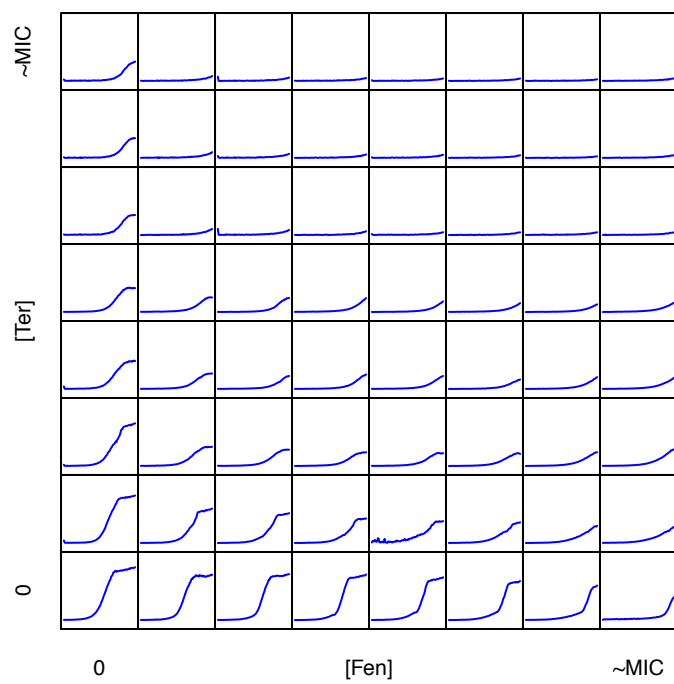

$\alpha = 1.528557$

CXVII

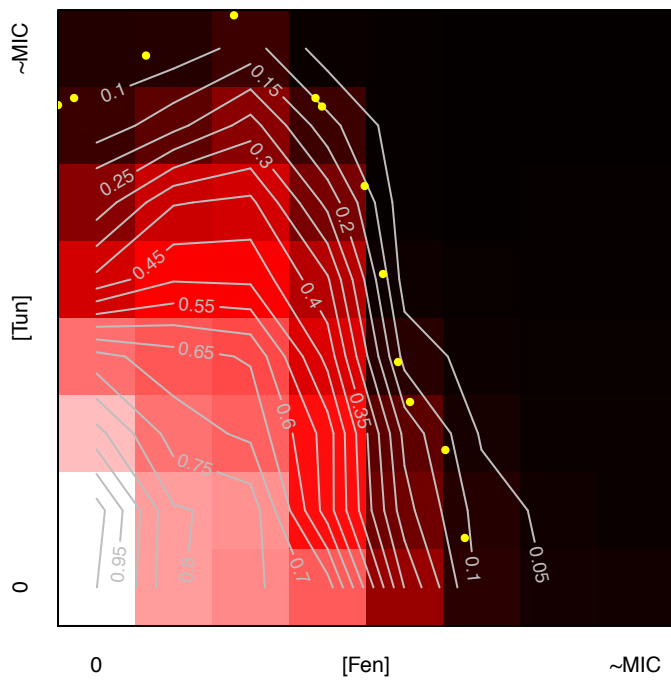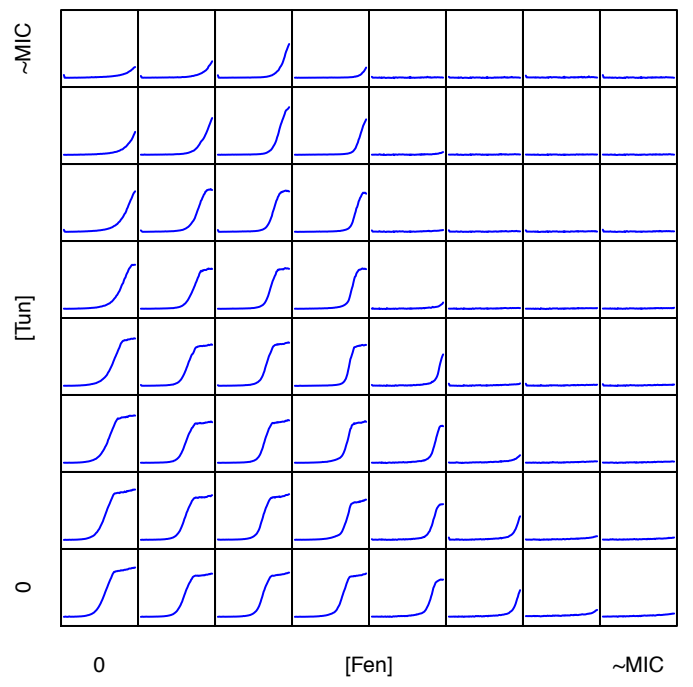

$\alpha = -0.1271207$

CXVIII

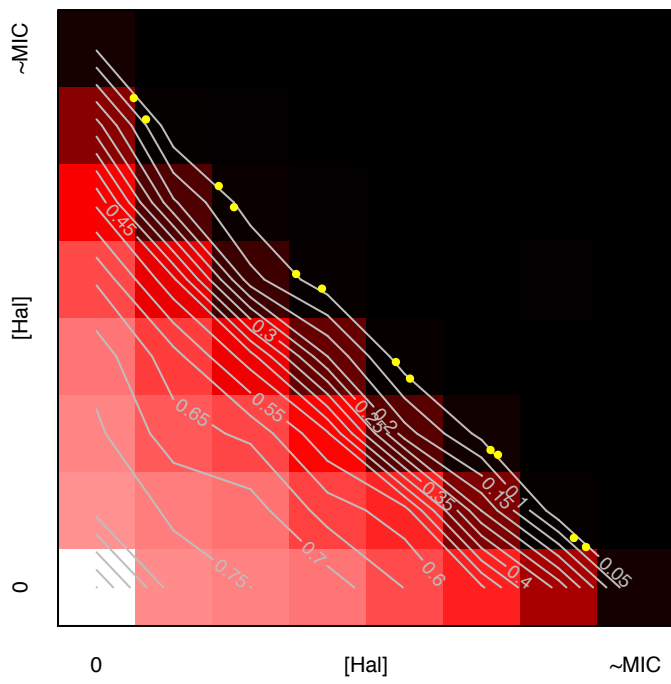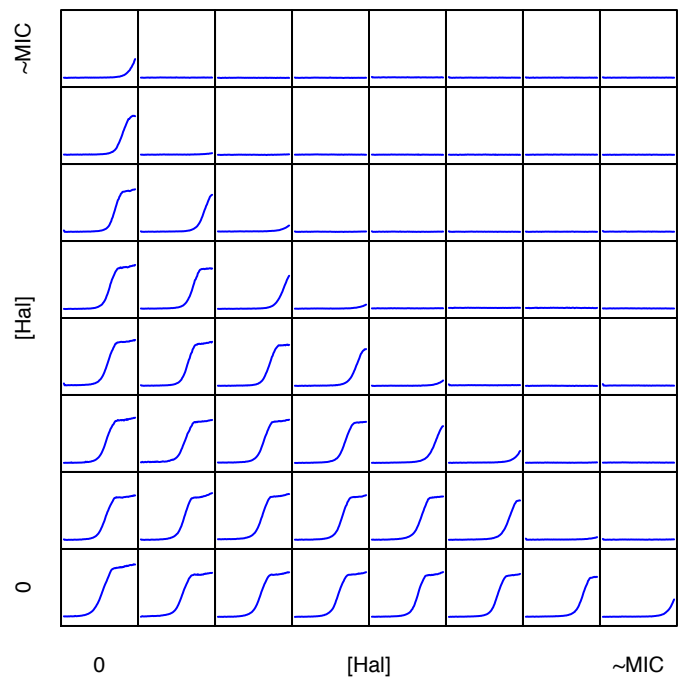

$\alpha = -1.534703$

CXIX

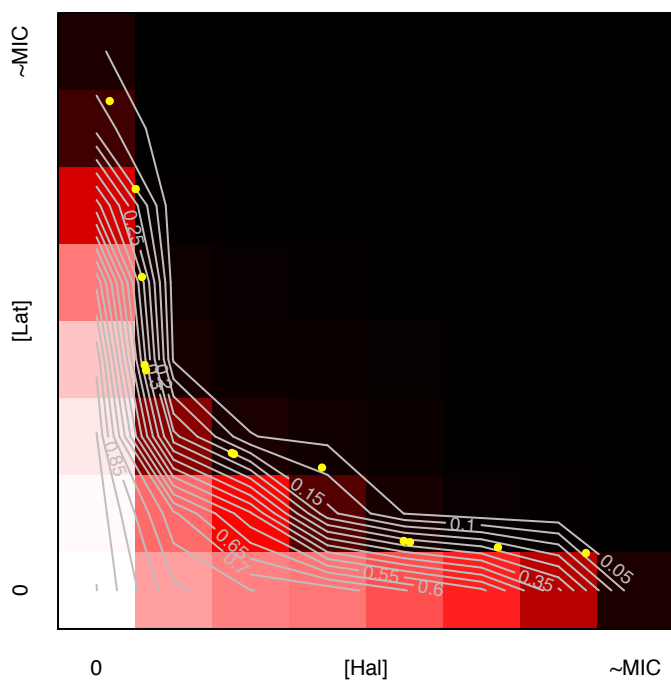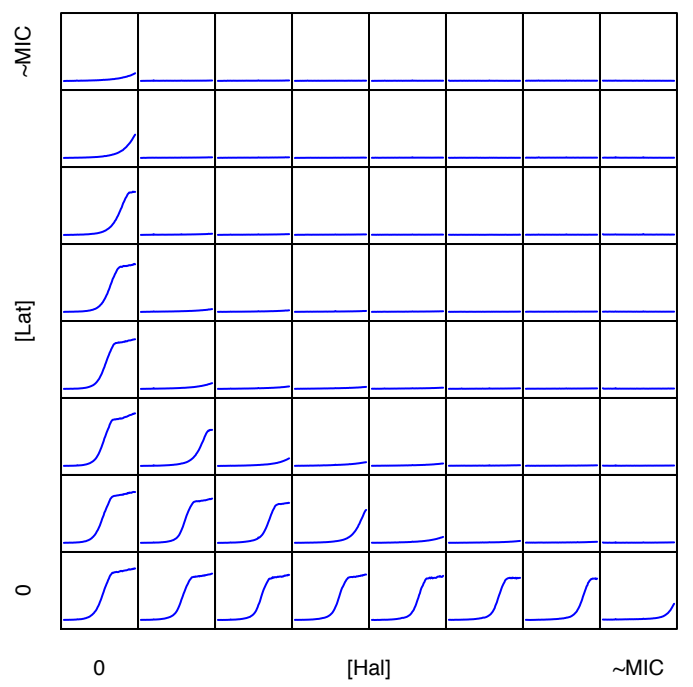

$\alpha = -1.444088$

CXX

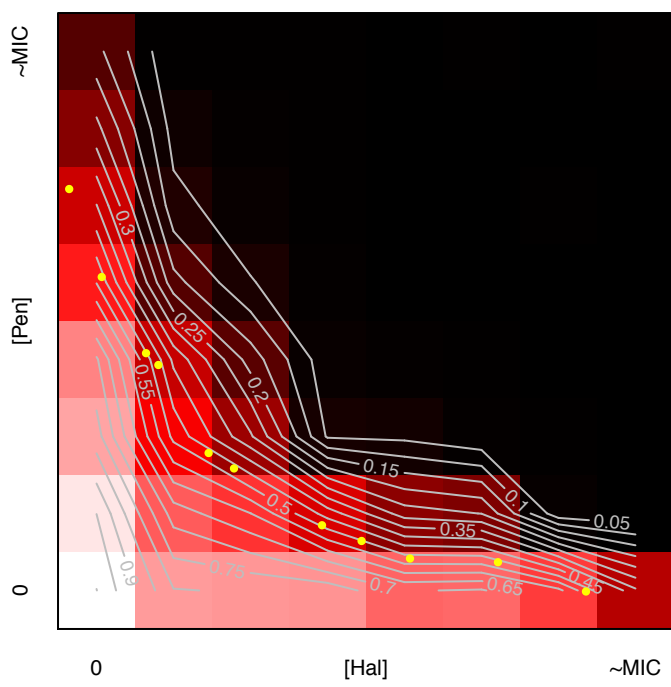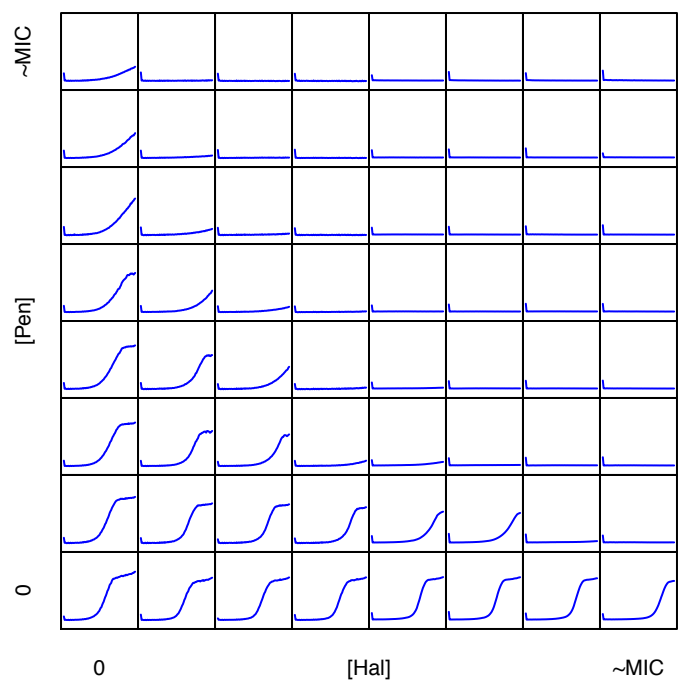

$\alpha = -0.4062178$

CXXi

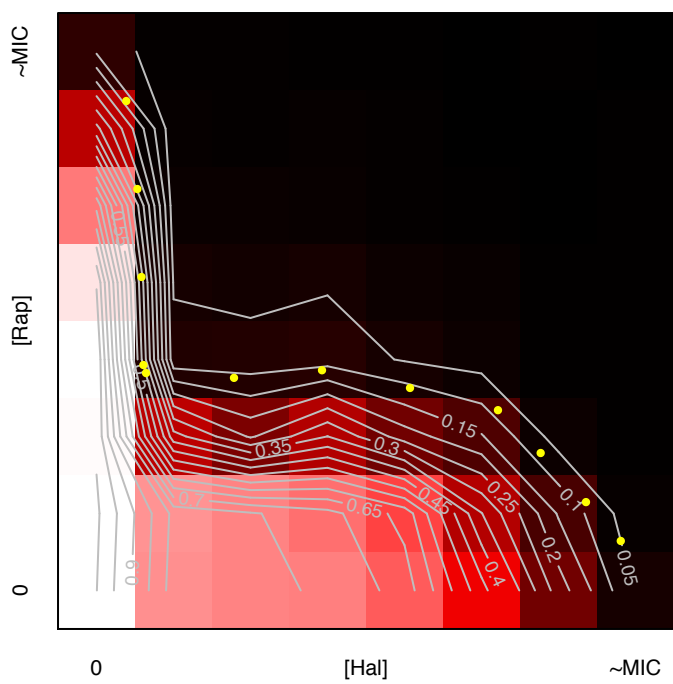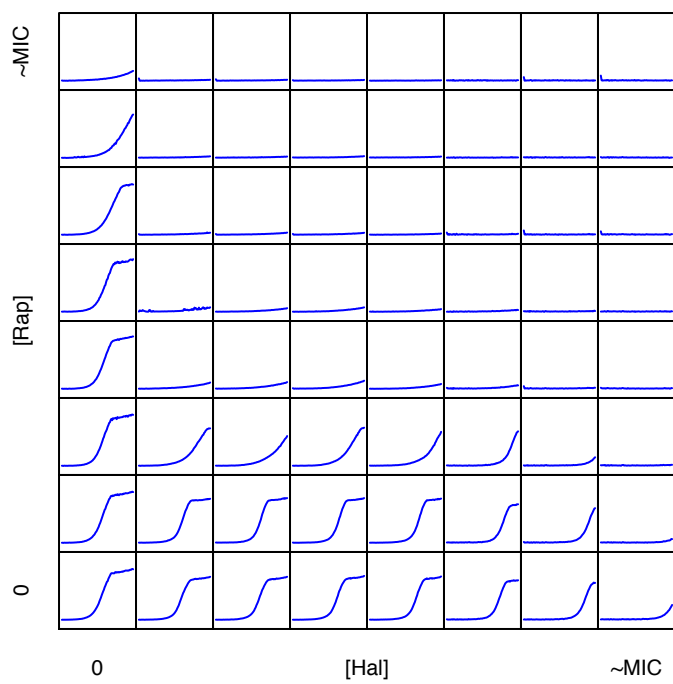

$\alpha = -1.156822$

CXXii

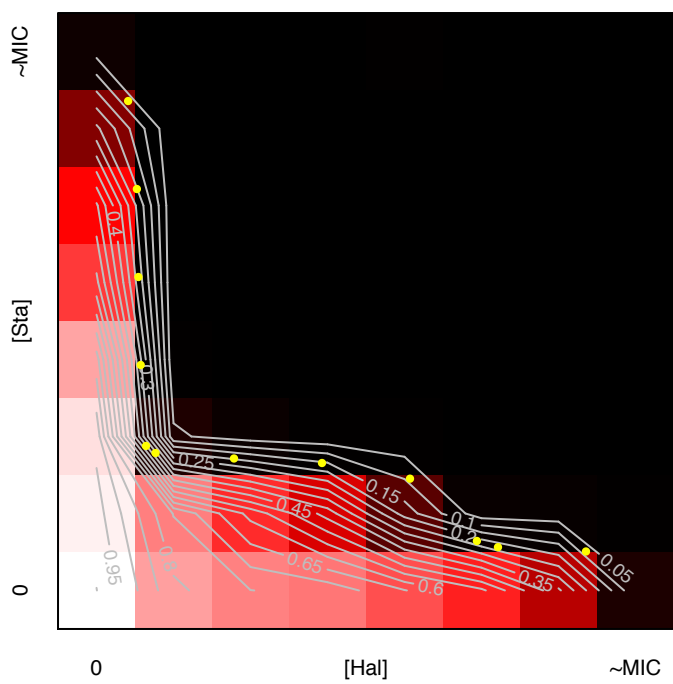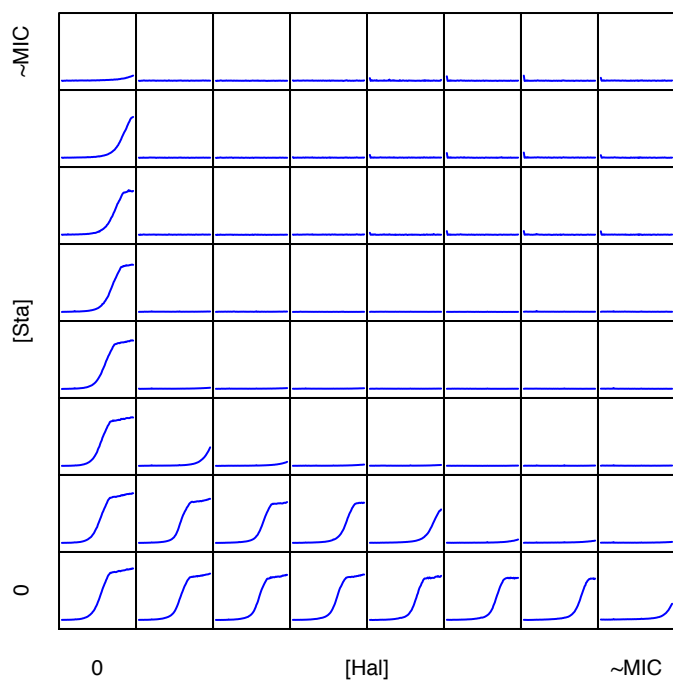

$\alpha = -1.241121$

CXXiii

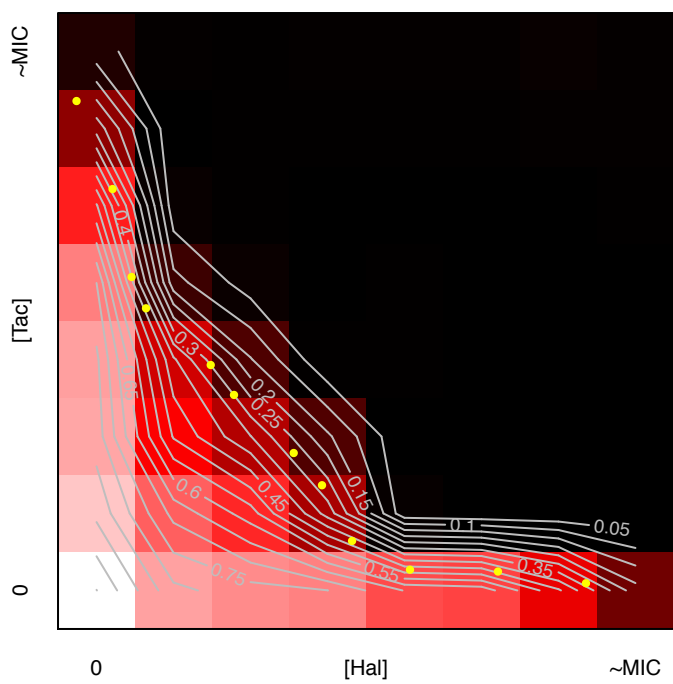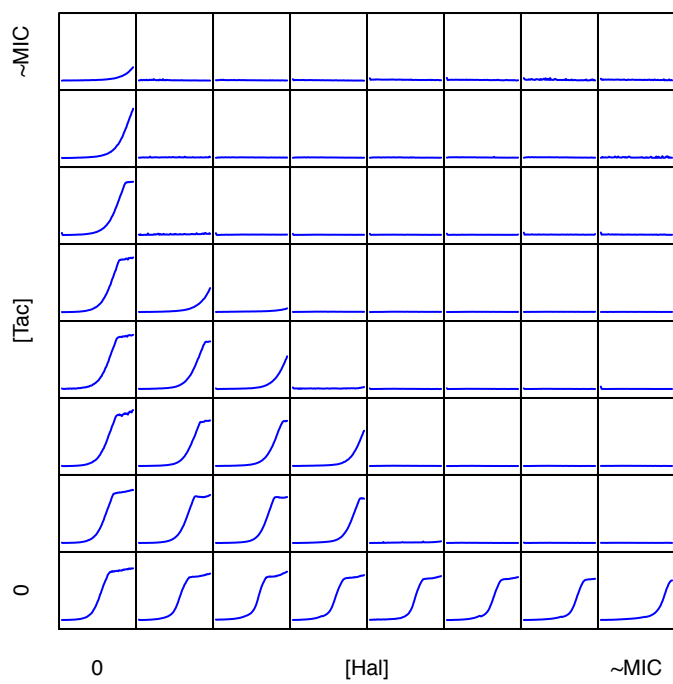

$\alpha = -1.956164$

CXXiv

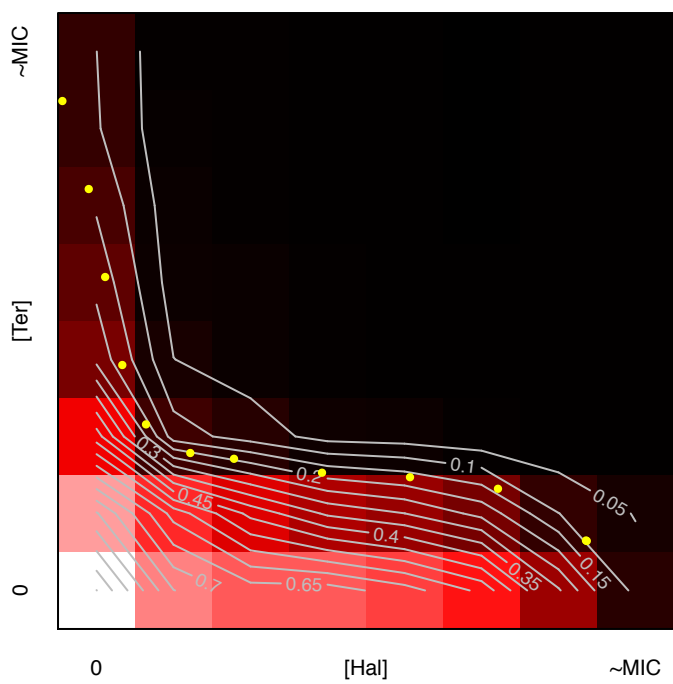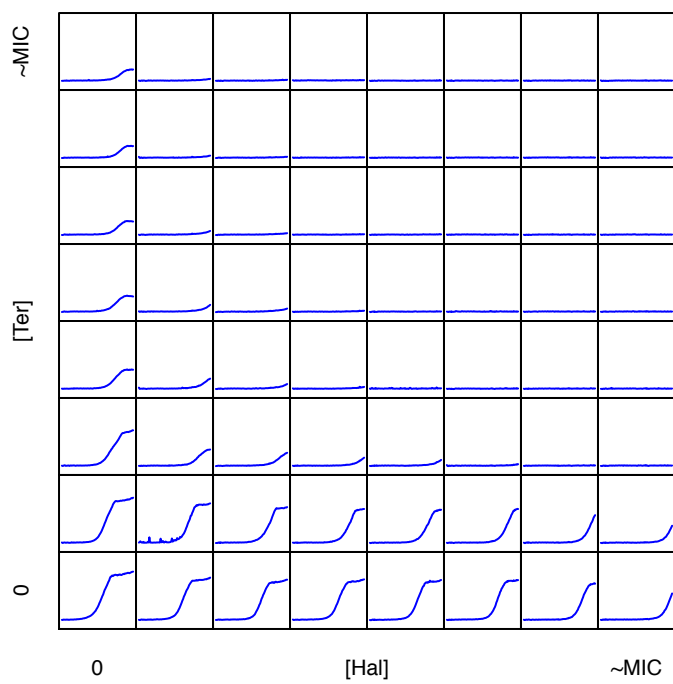

$\alpha = 1.732372$ 

CXXV

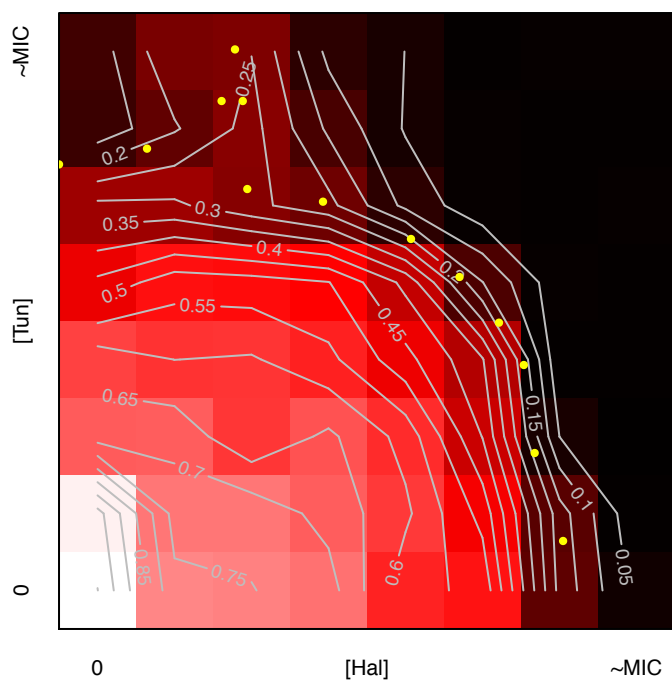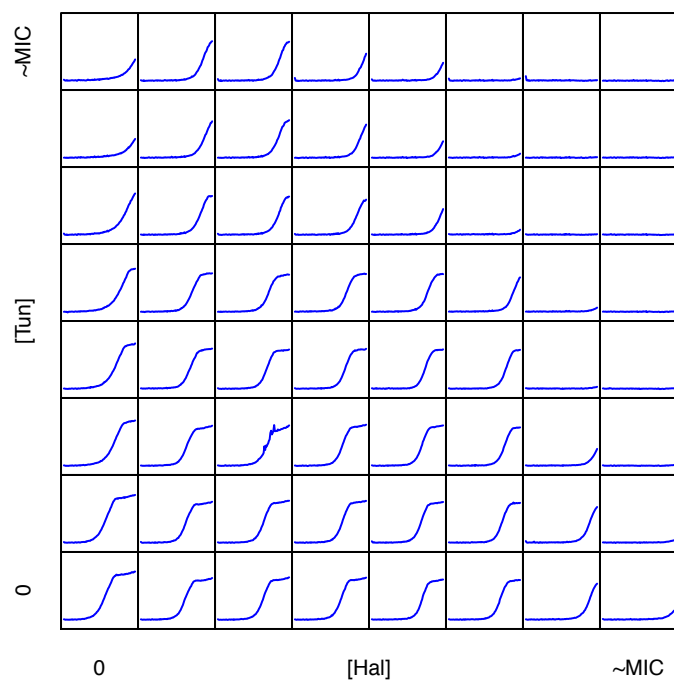 $\alpha = 1.907453$ 

CXXvi

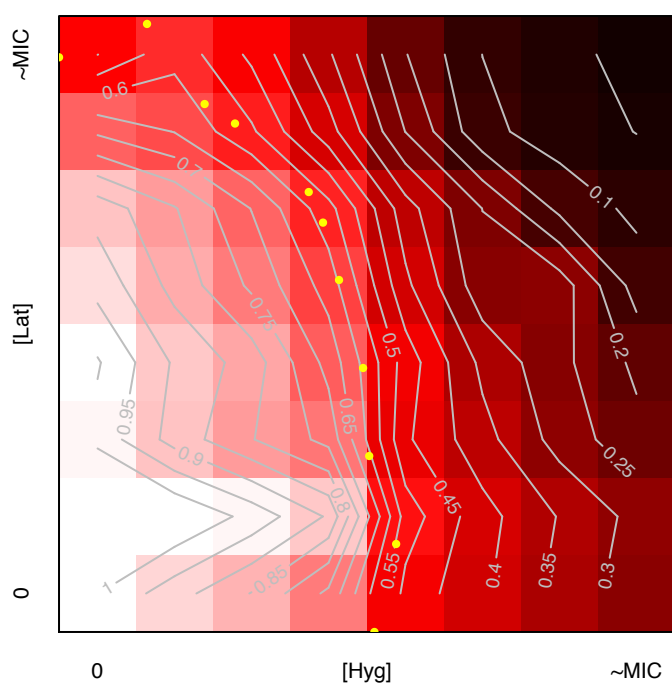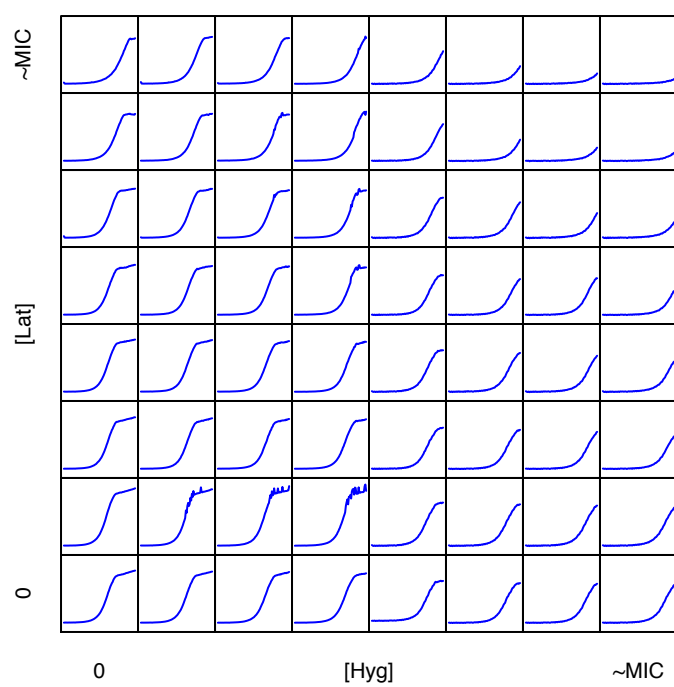 $\alpha = -0.7543034$ 

CXXvii

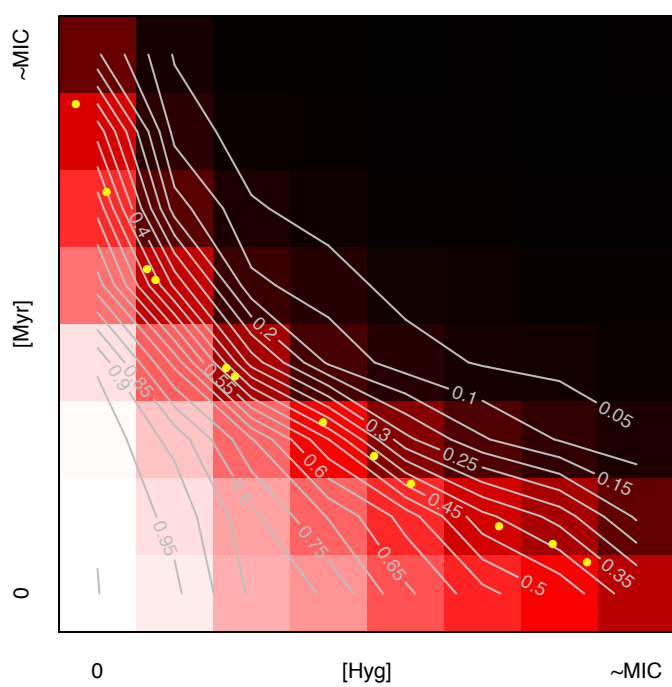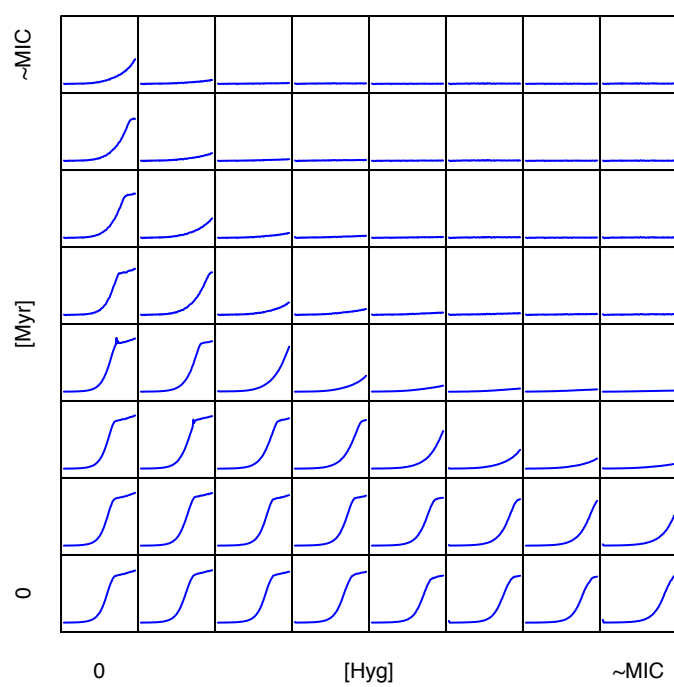 $\alpha = 0.4635056$ 

CXXviii

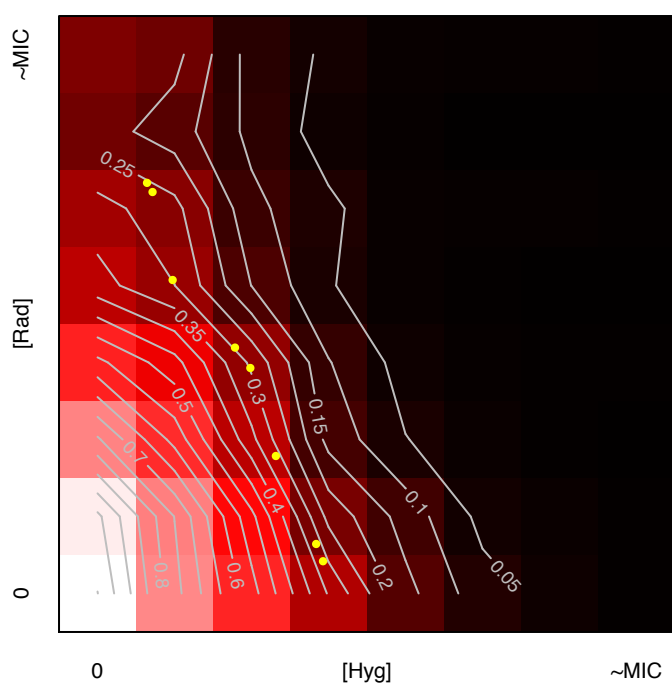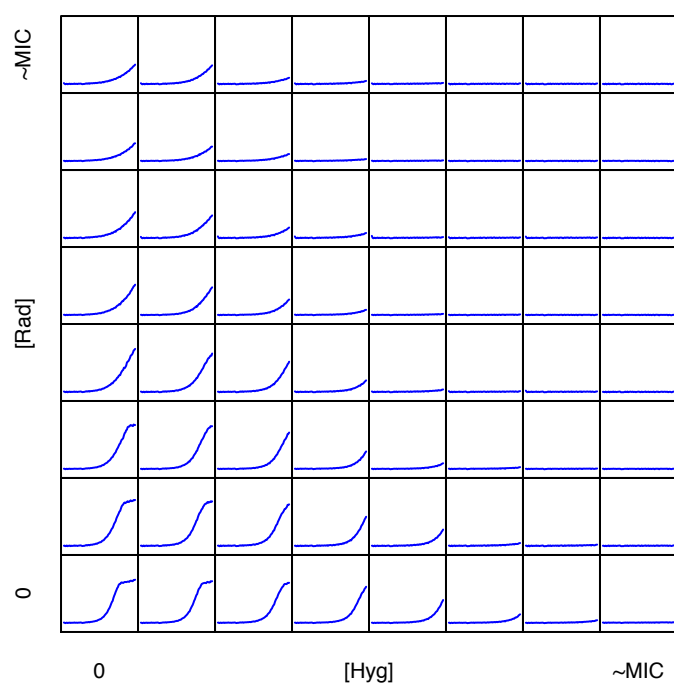



$\alpha = 1.154270$

CXXIX

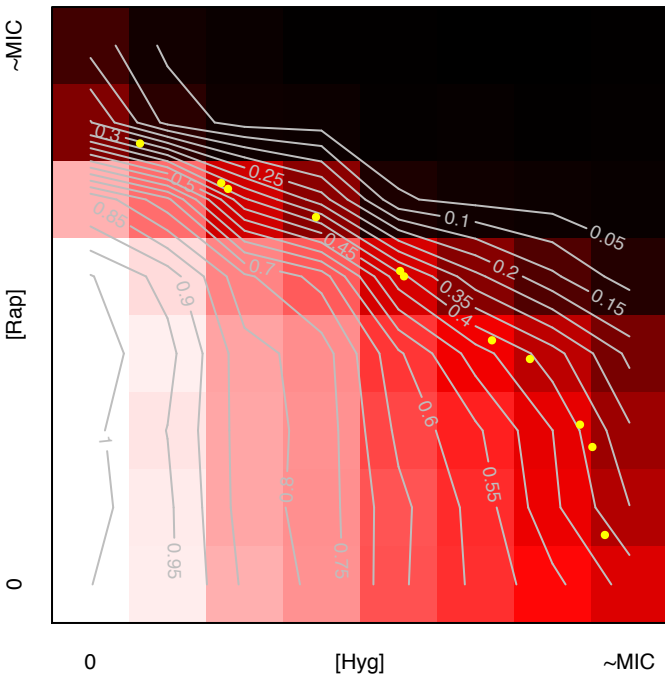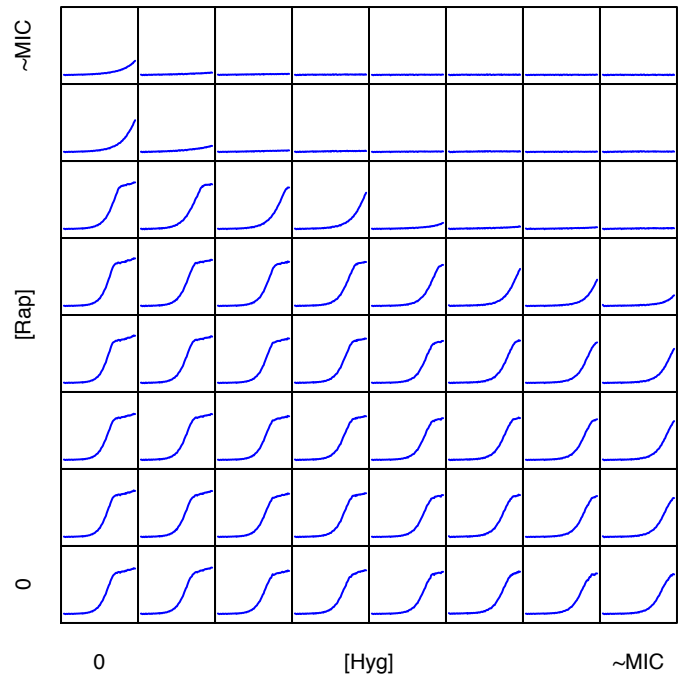

$\alpha = 0.6086447$

CXXX

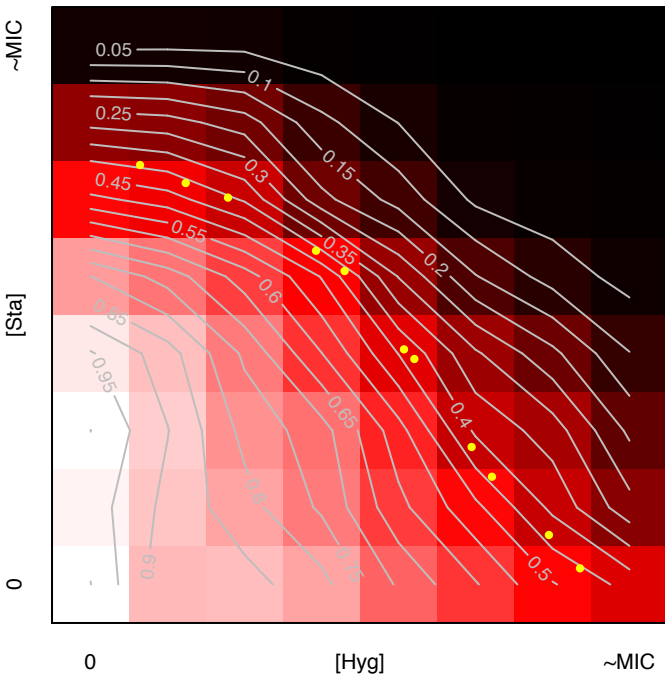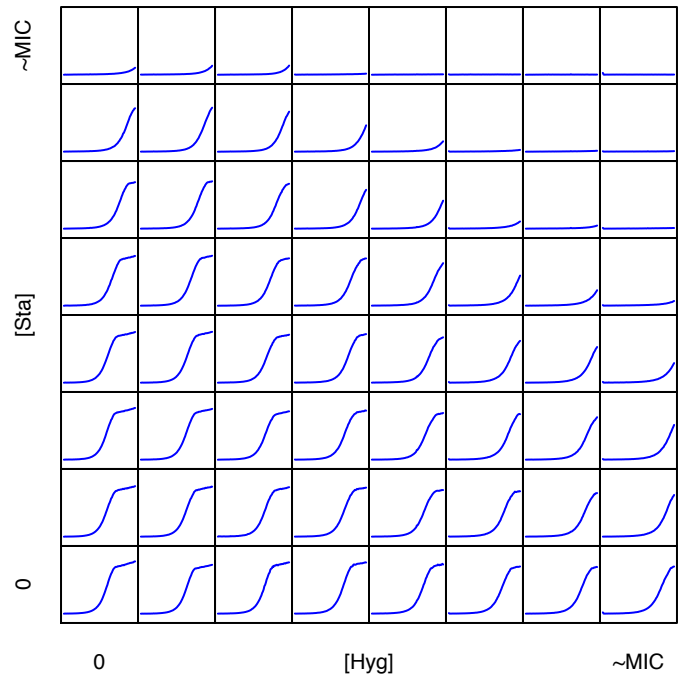

$\alpha = -0.3830895$

CXXXI

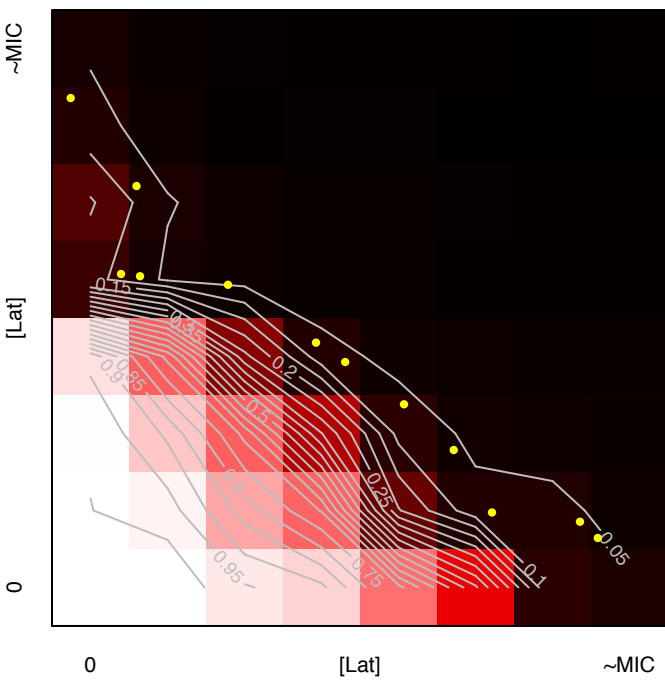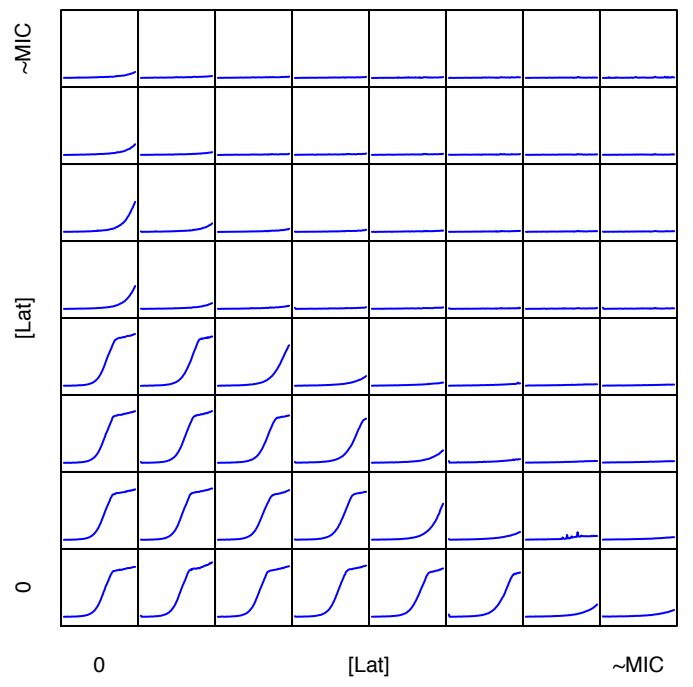

$\alpha = 1.180347$

CXXXII

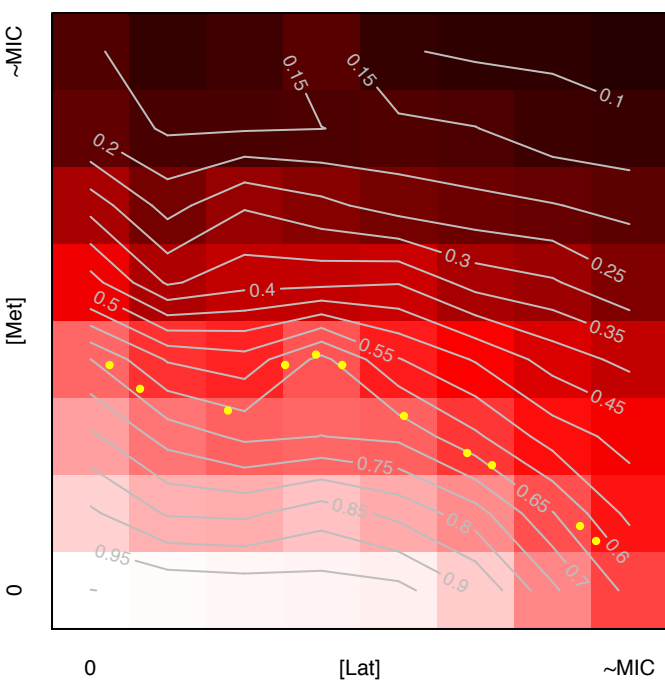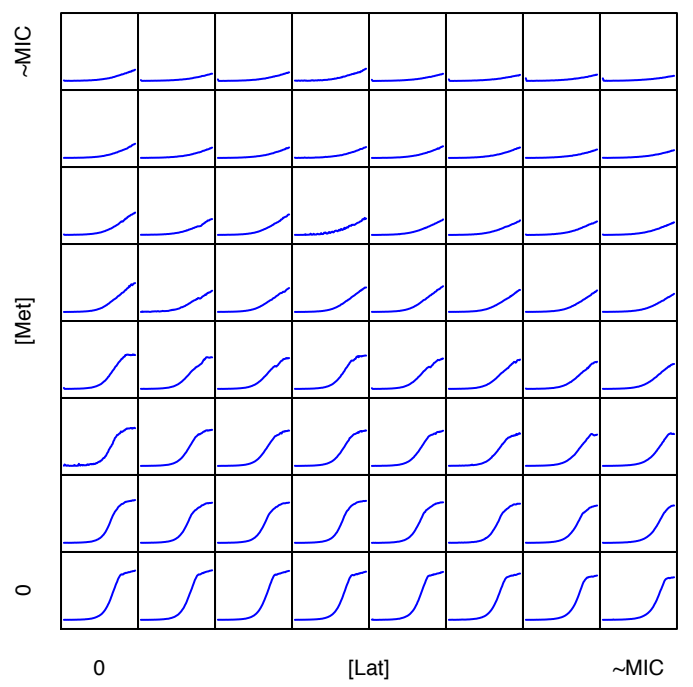

$\alpha = 0.941503$ 

CXXXiii

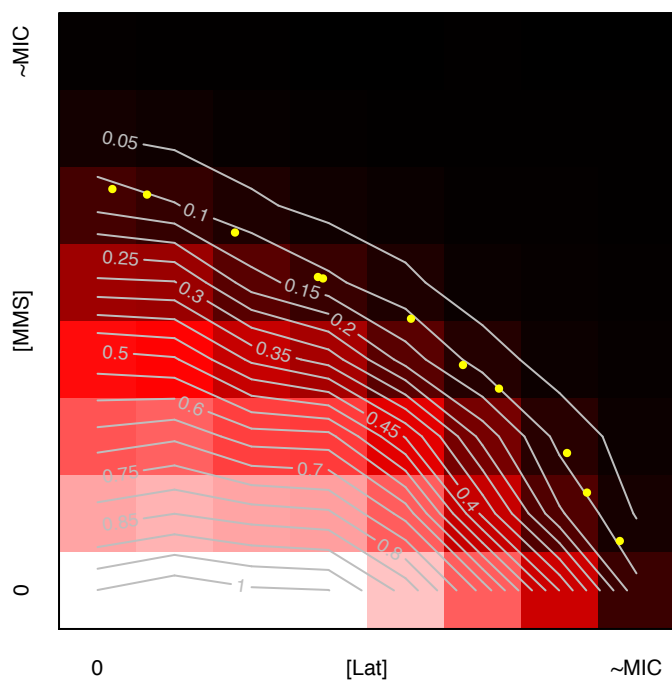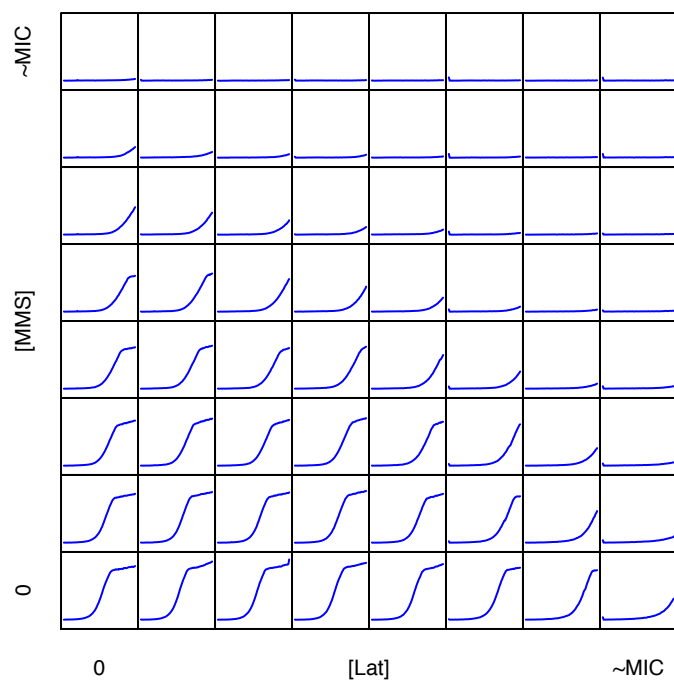 $\alpha = -0.1625229$ 

CXXXiv

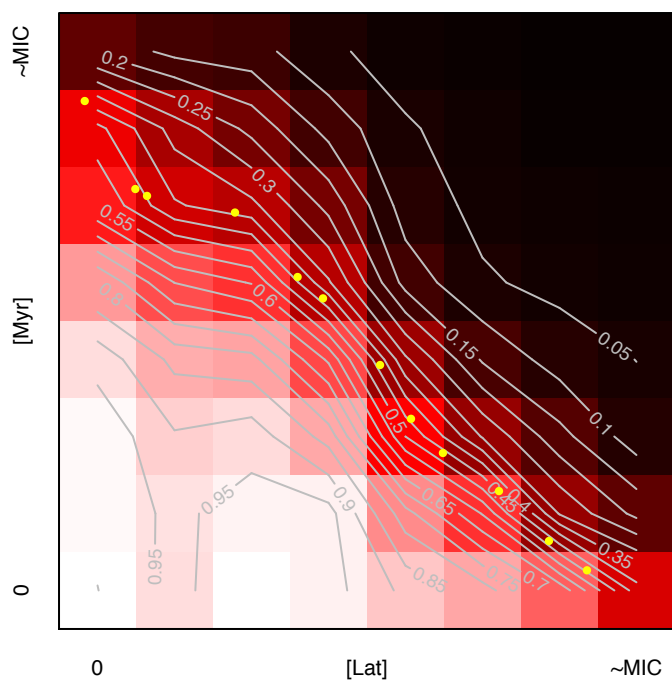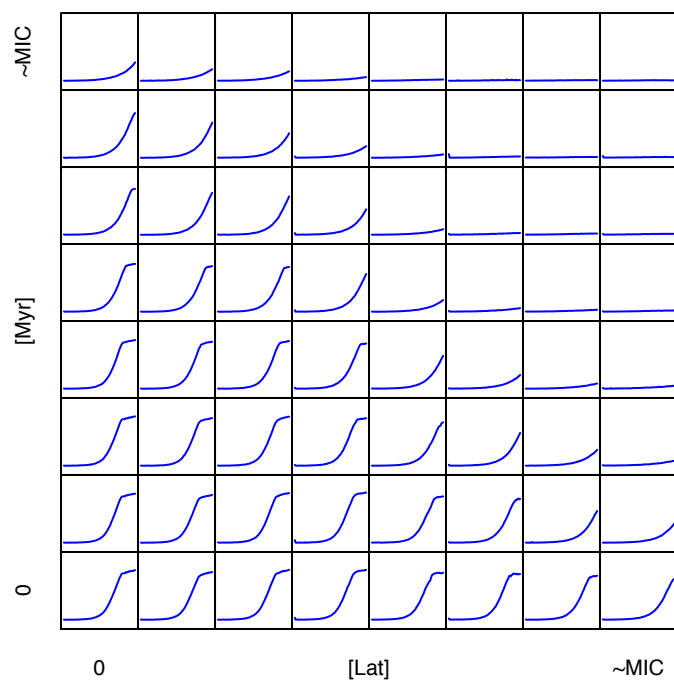 $\alpha = -1.107596$ 

CXXXV

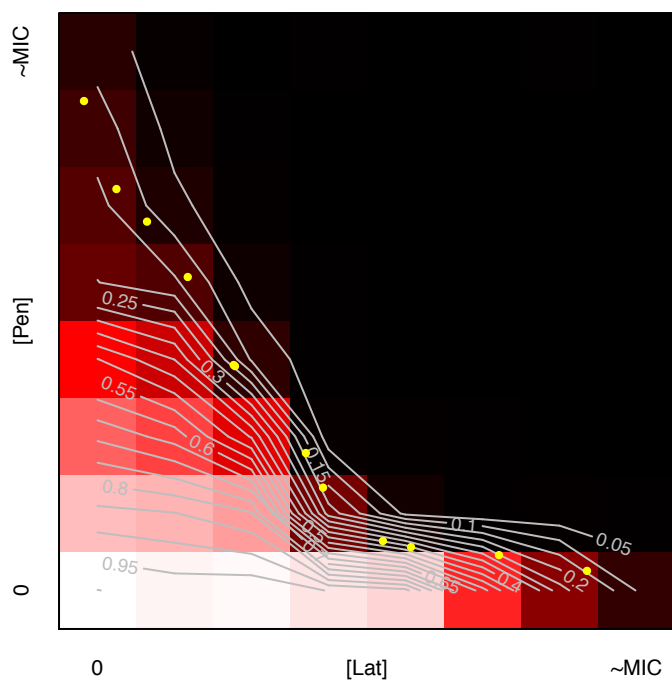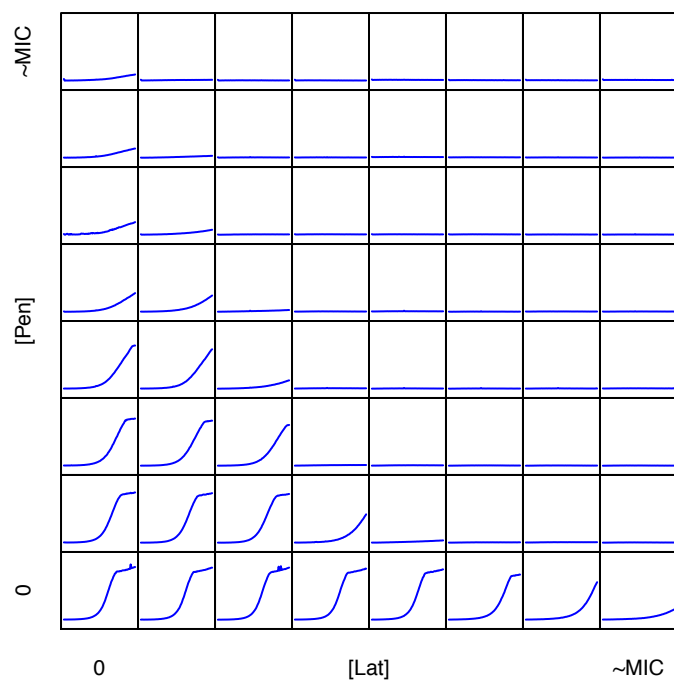 $\alpha = 3.350255$ 

CXXXvi

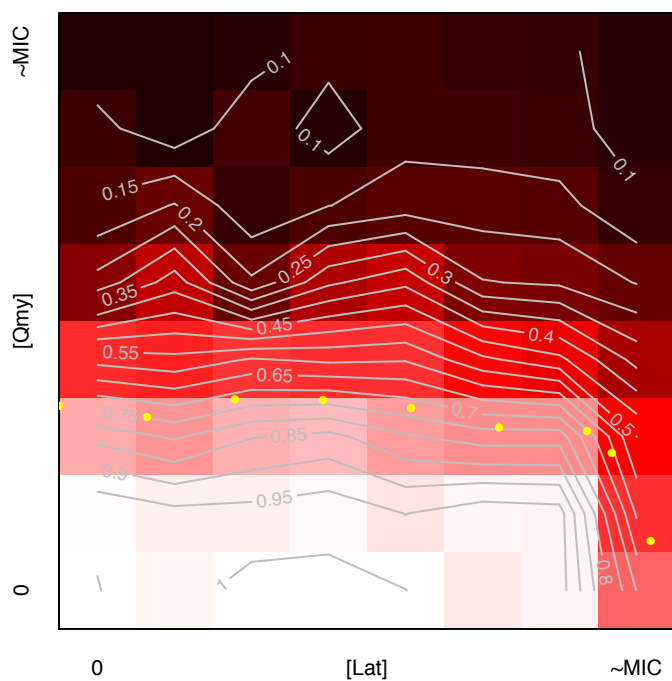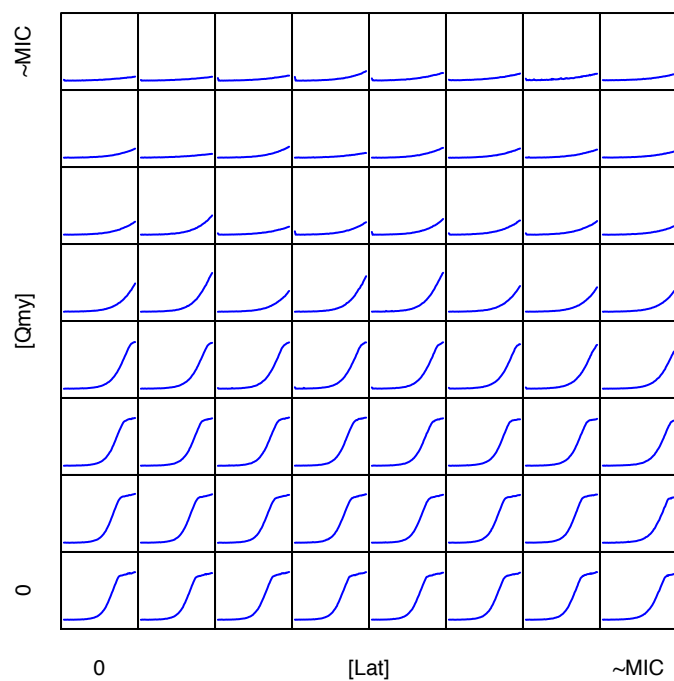

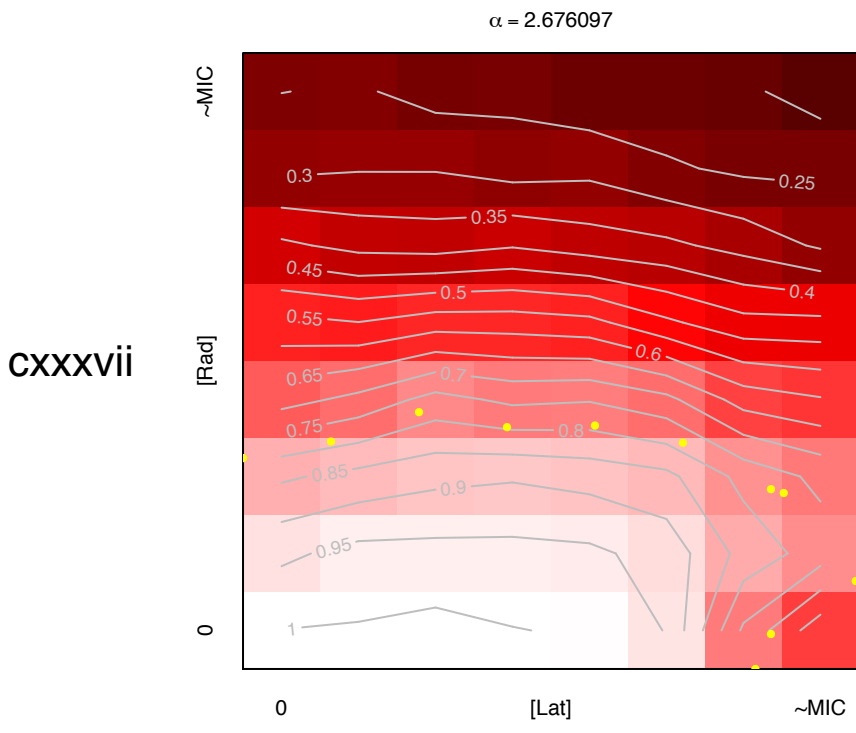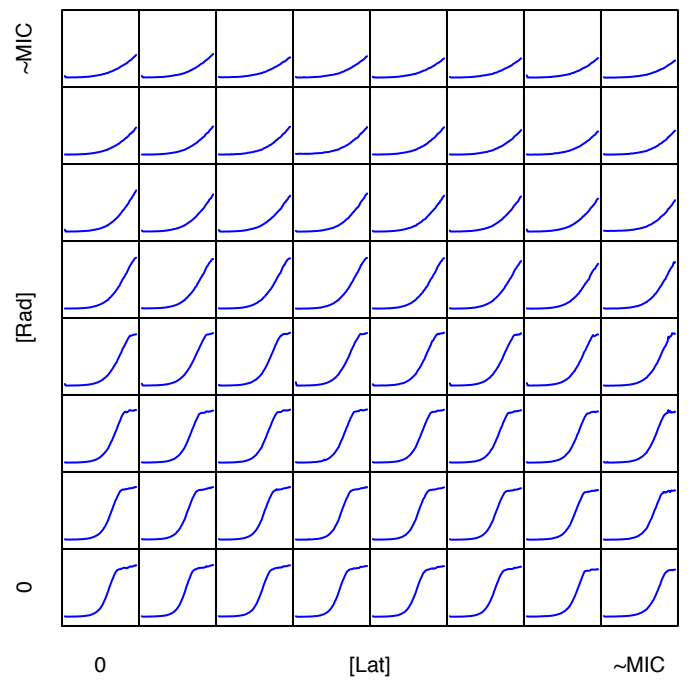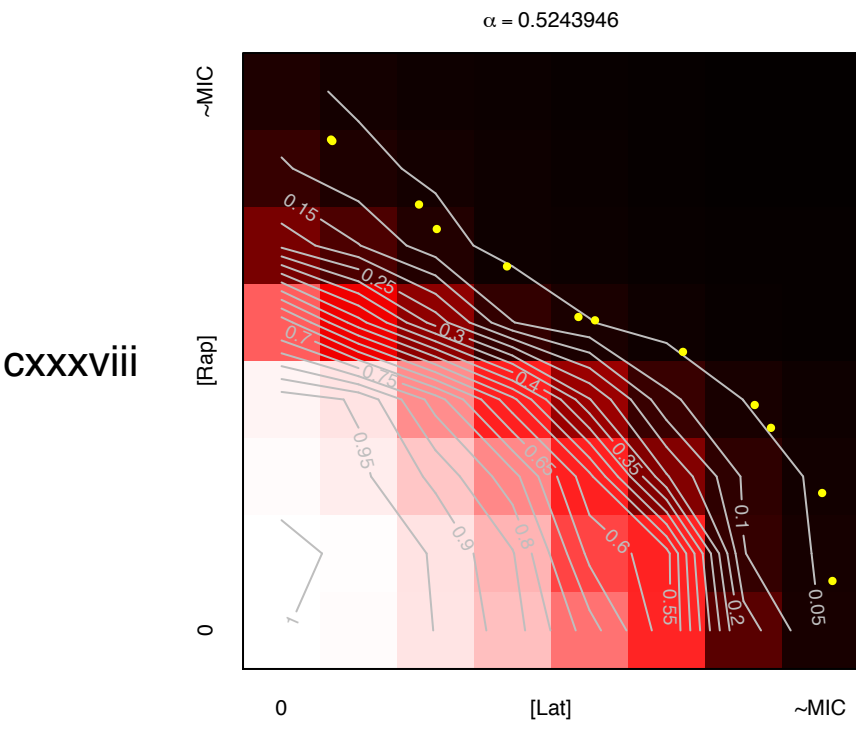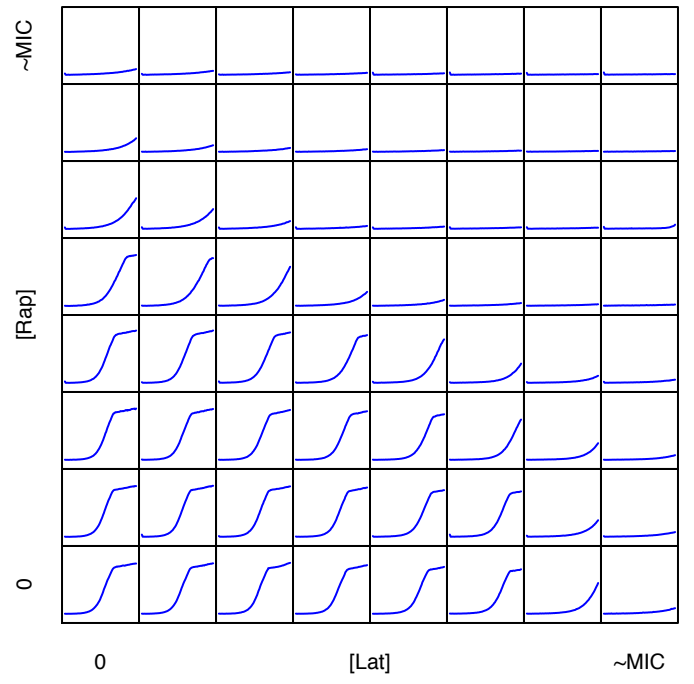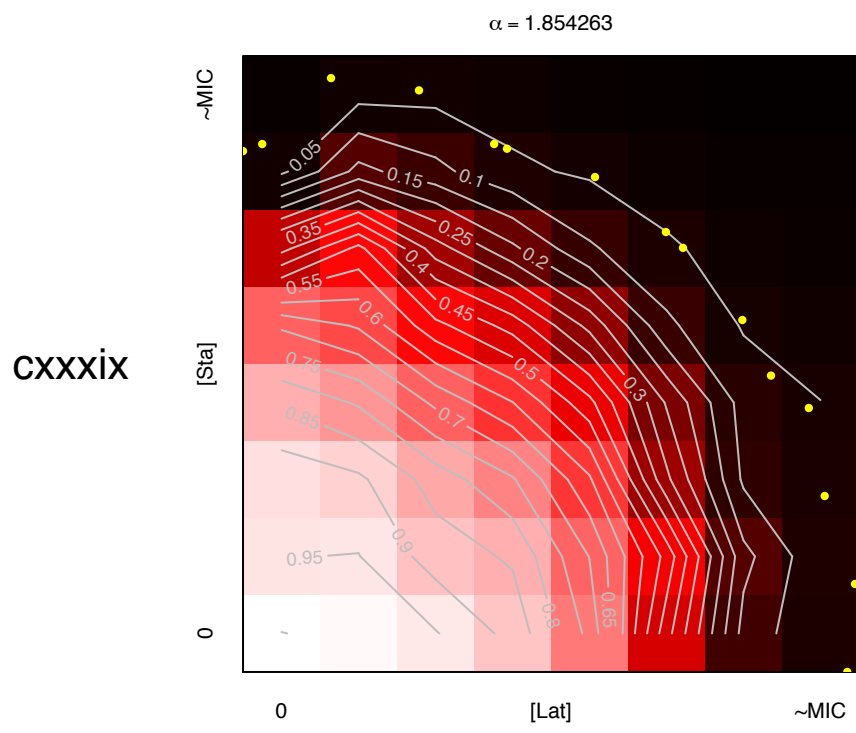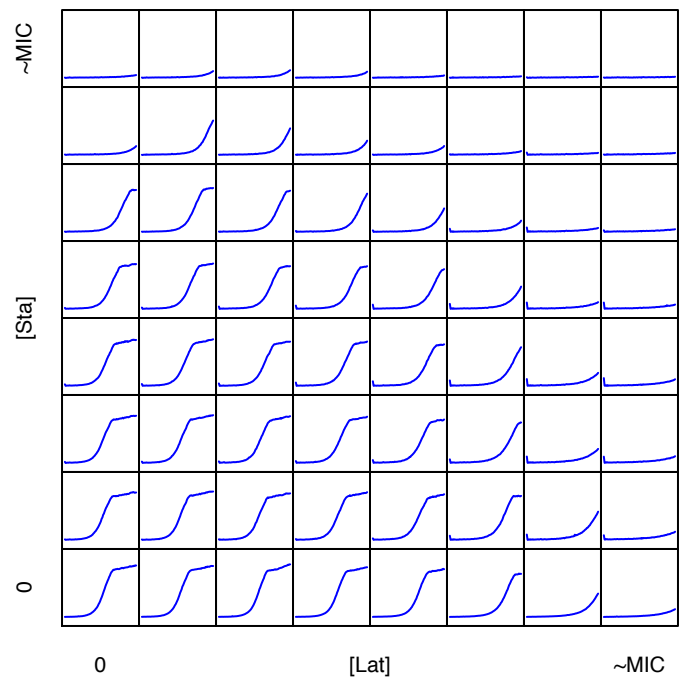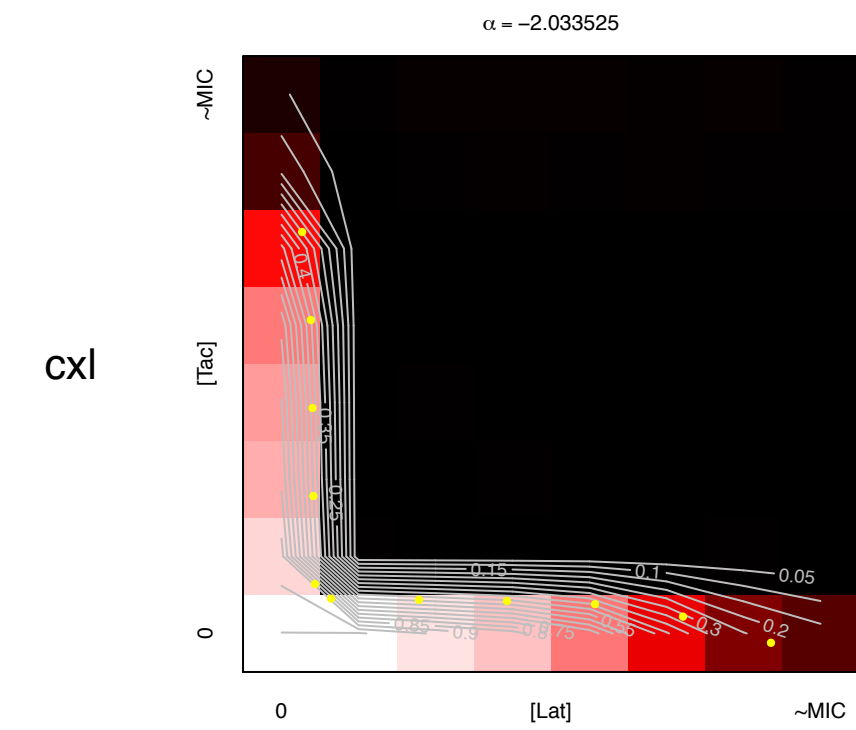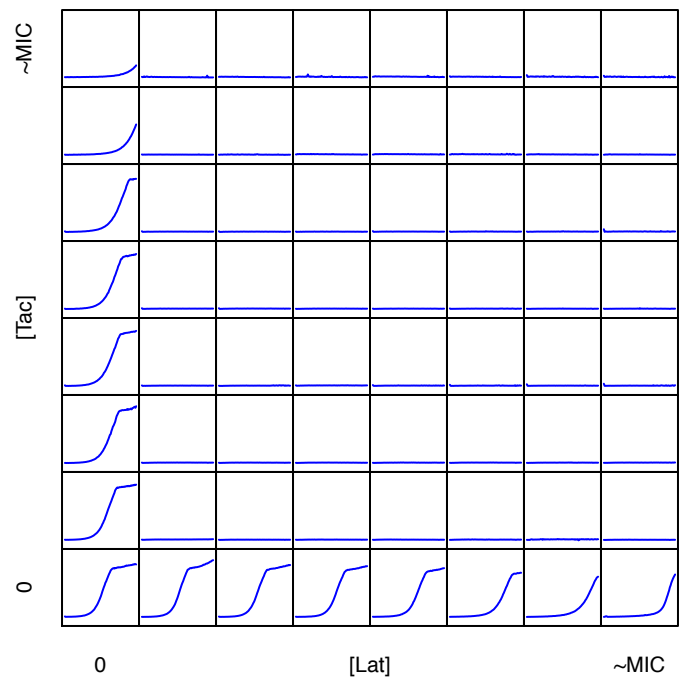

$\alpha = 0.8324194$

cxli

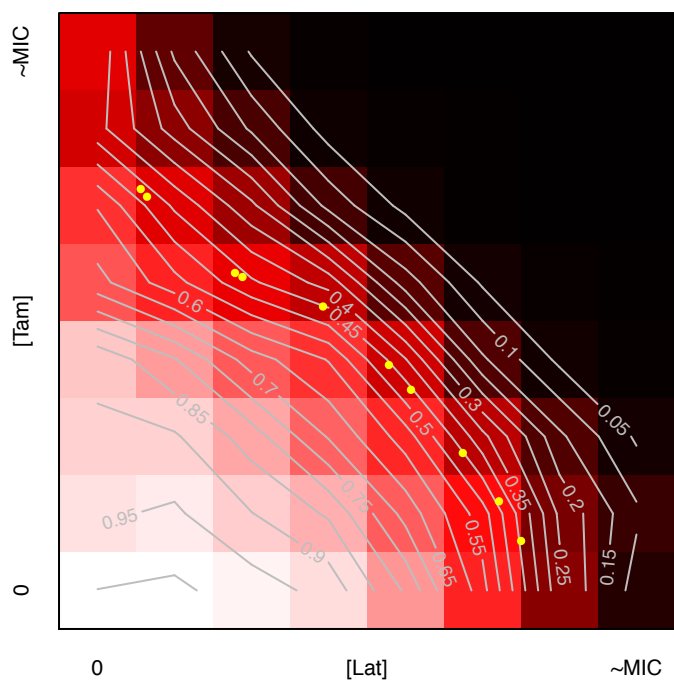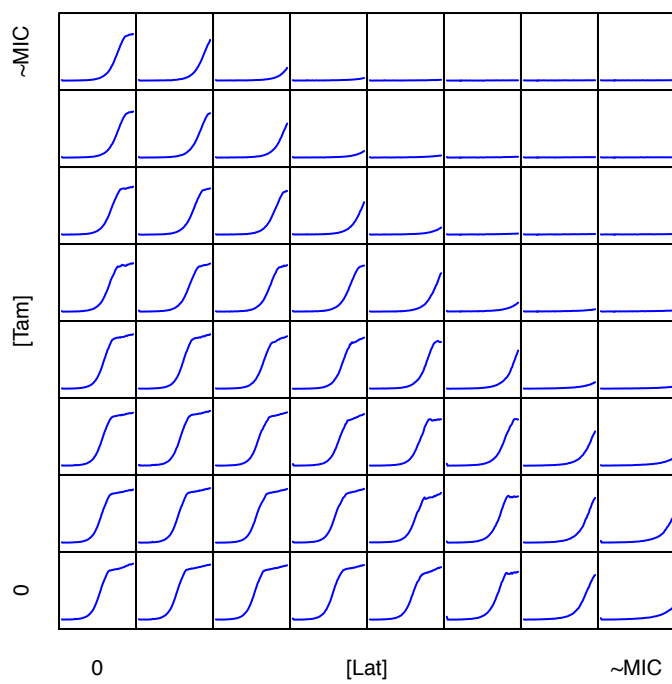

$\alpha = -2.425888$

cxlii

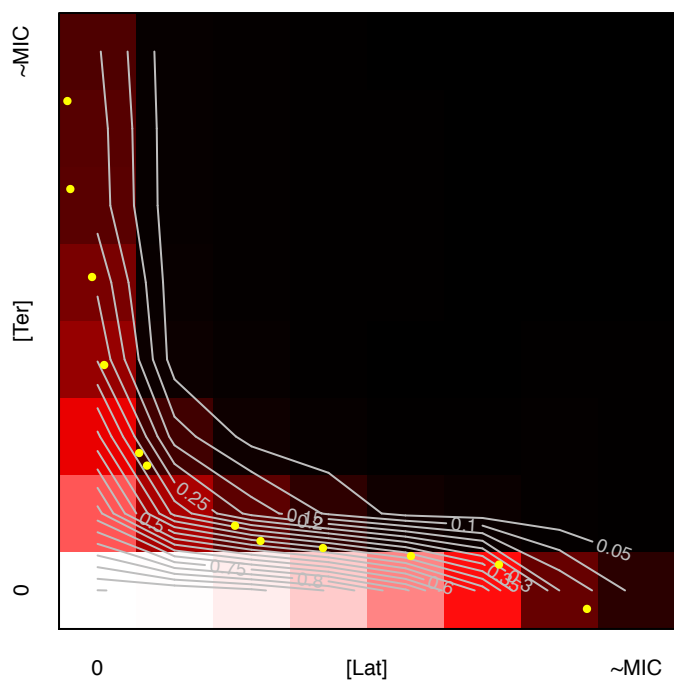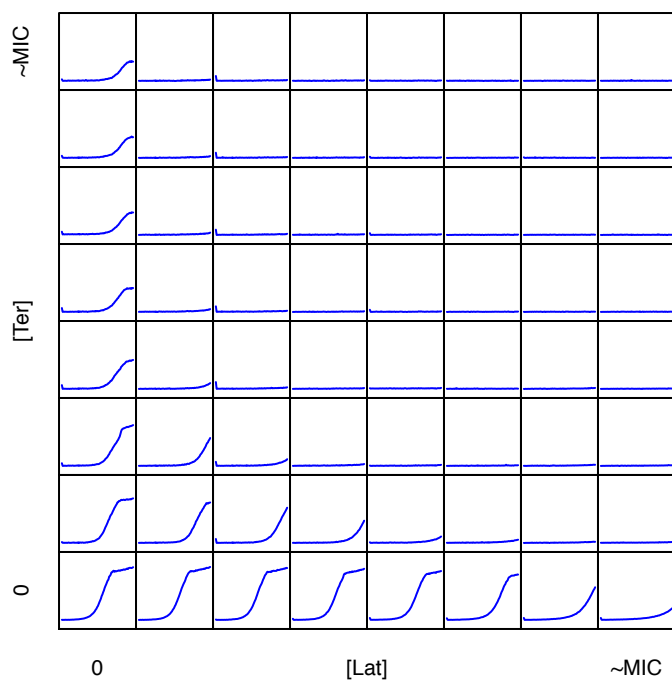

$\alpha = 0.6481033$

cxliiii

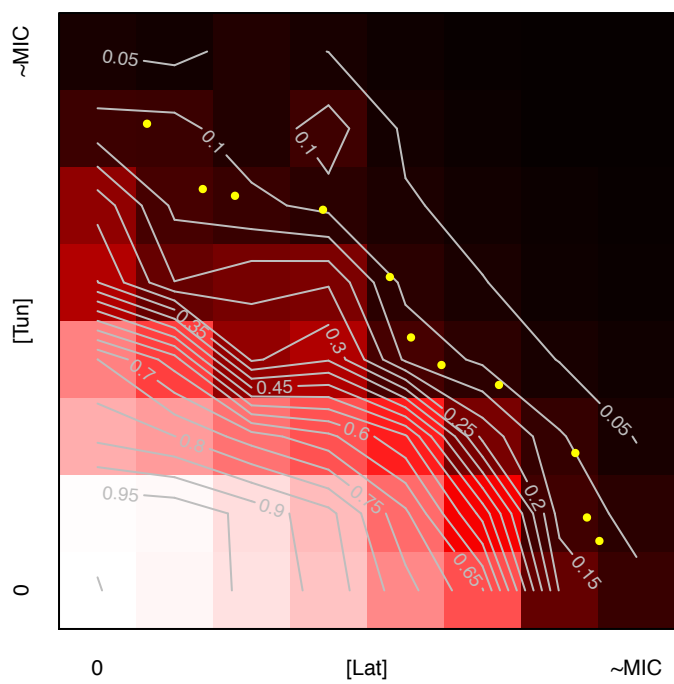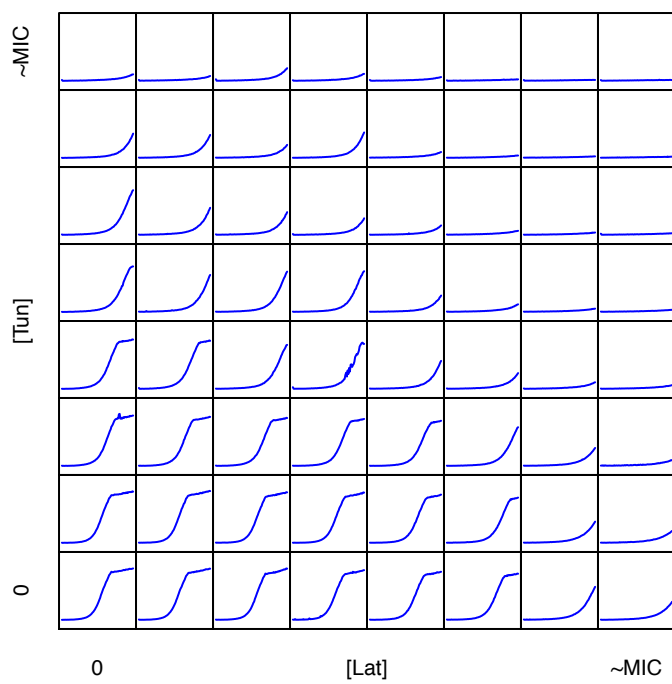

$\alpha = -0.3696332$

cxliv

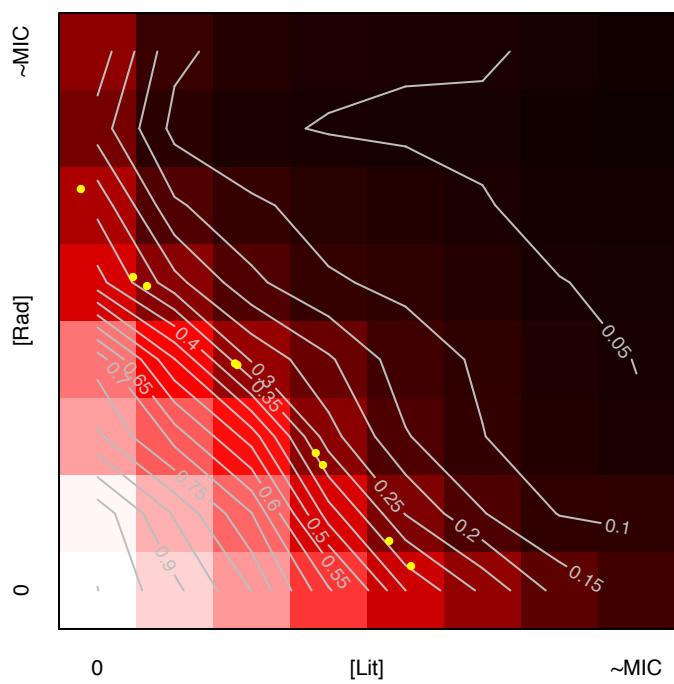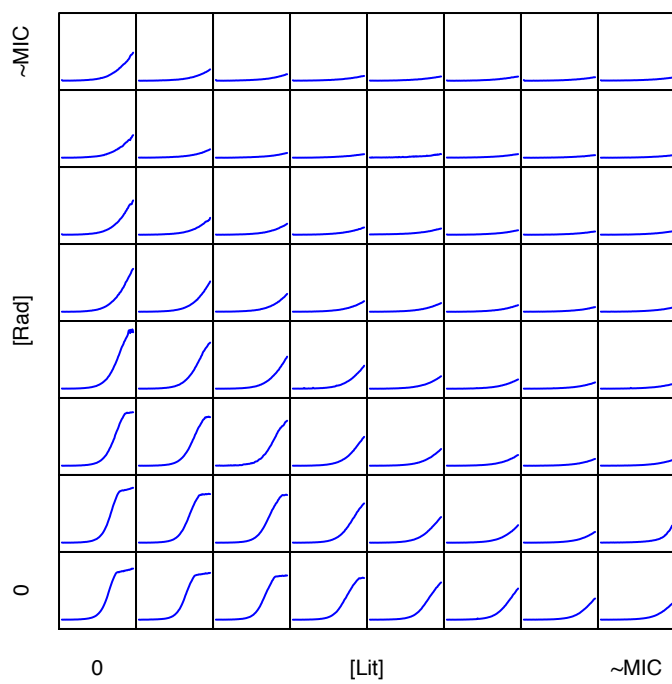

$\alpha = 0.6253137$

cxlv

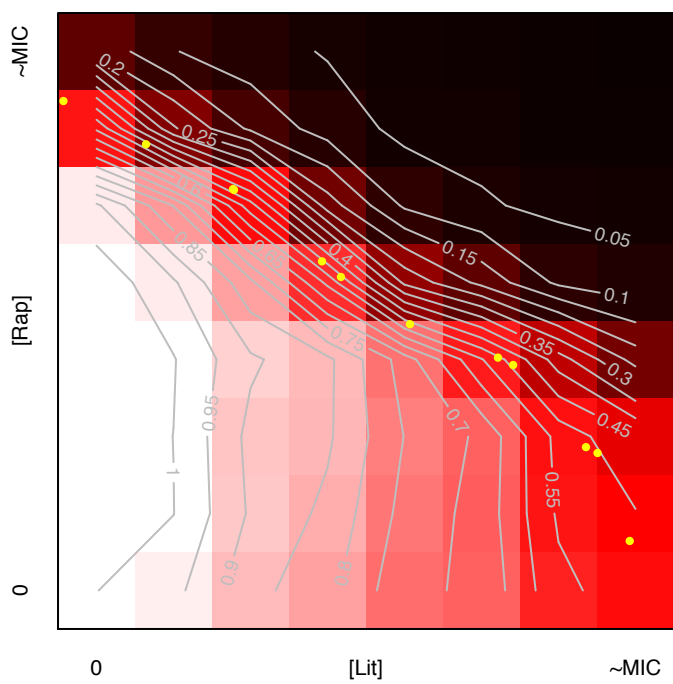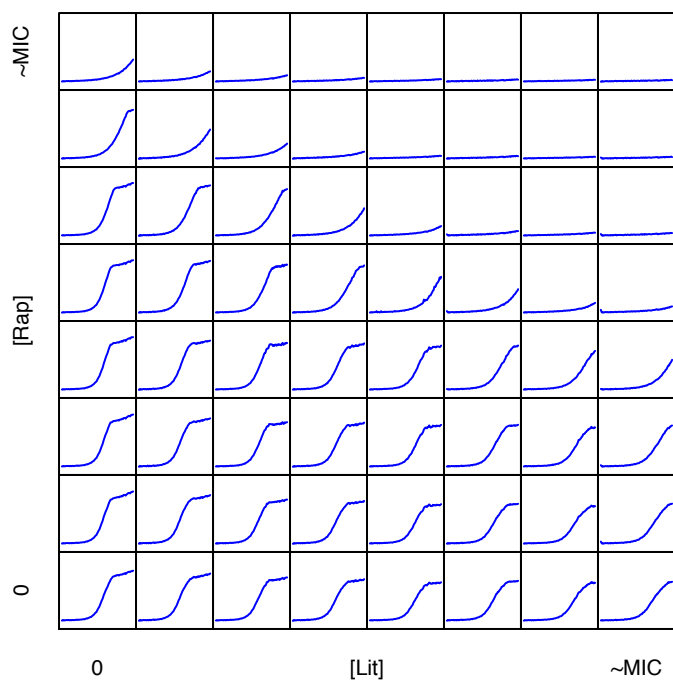

$\alpha = 0.4078372$

cxlvi

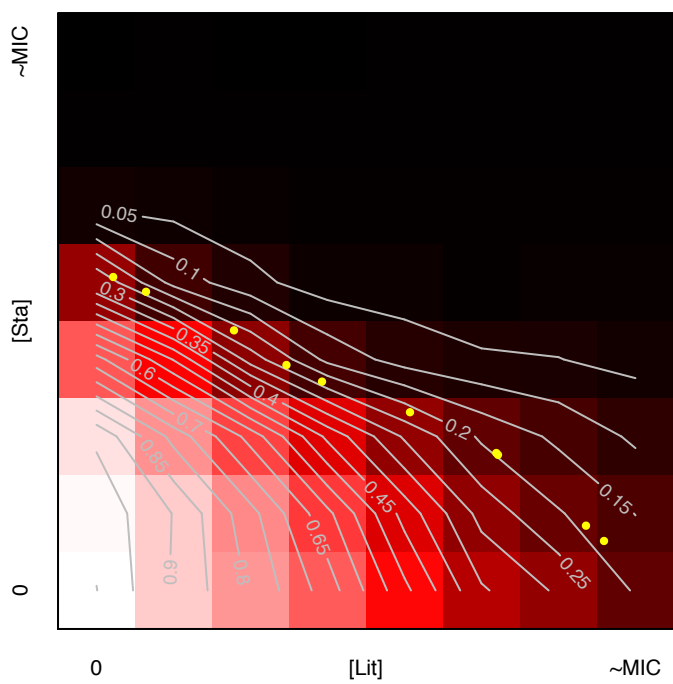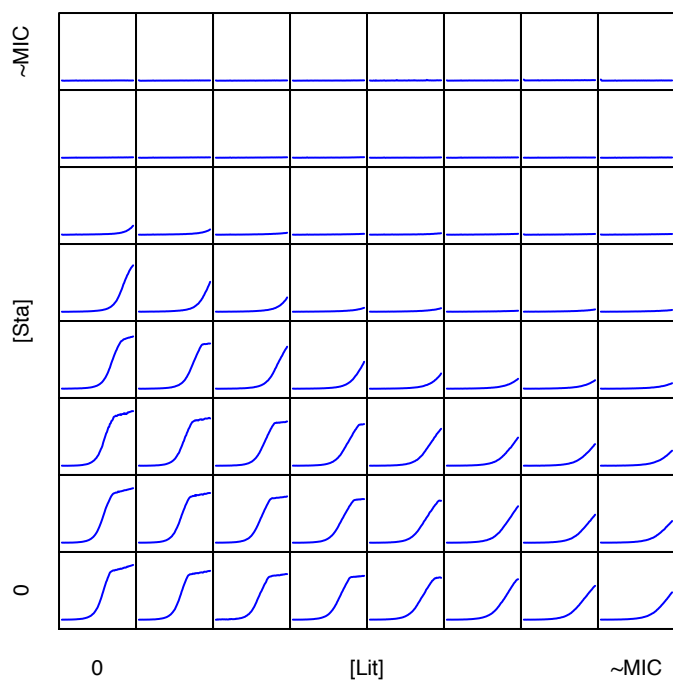

$\alpha = -1.463305$

cxlvii

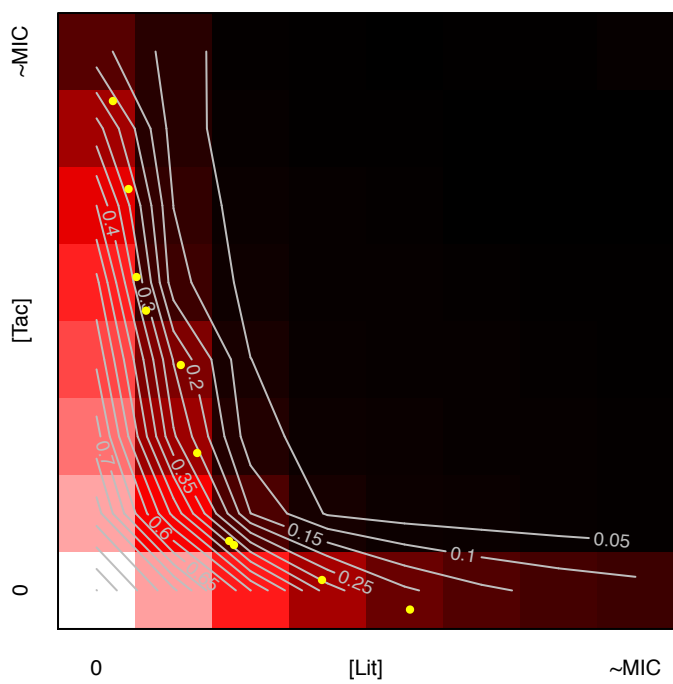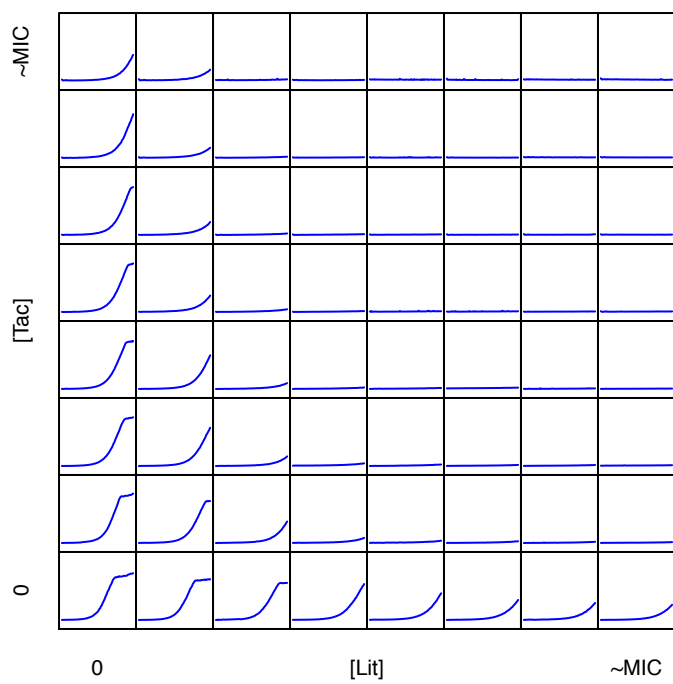

$\alpha = -0.2572479$

cxlviii

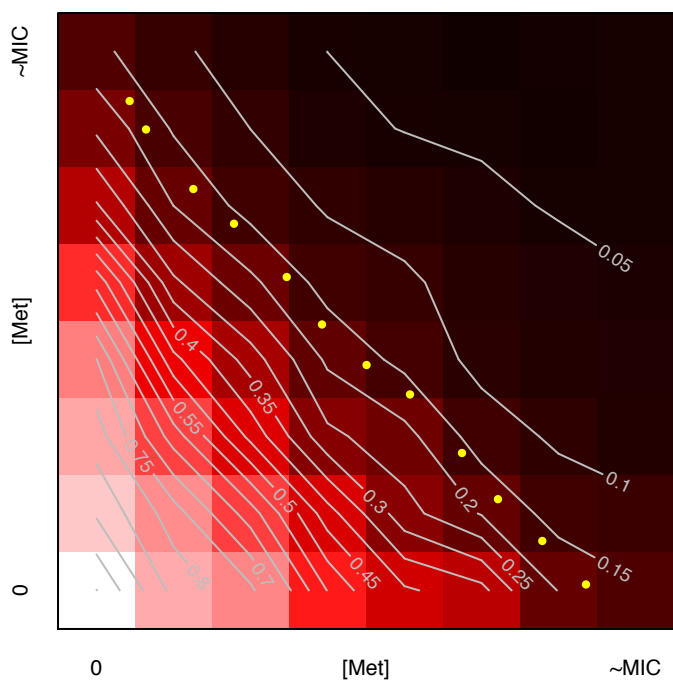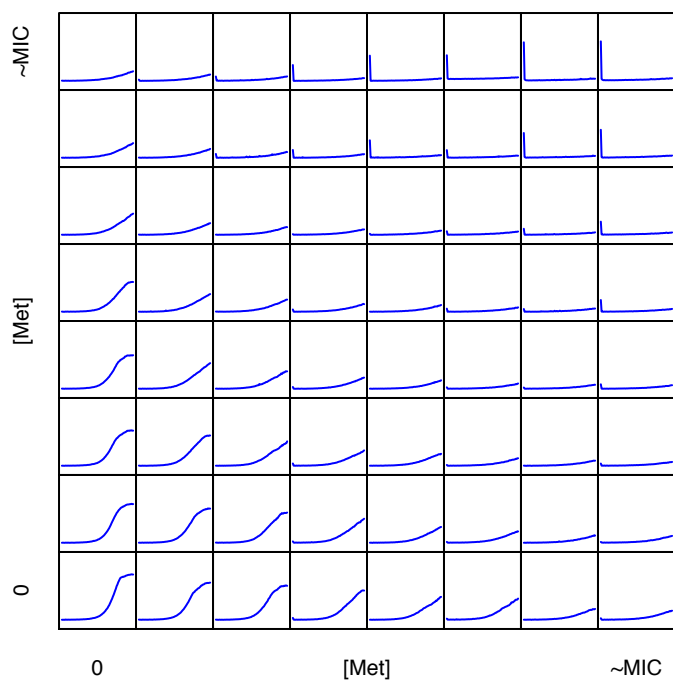

$\alpha = 1.502372$

cxlix

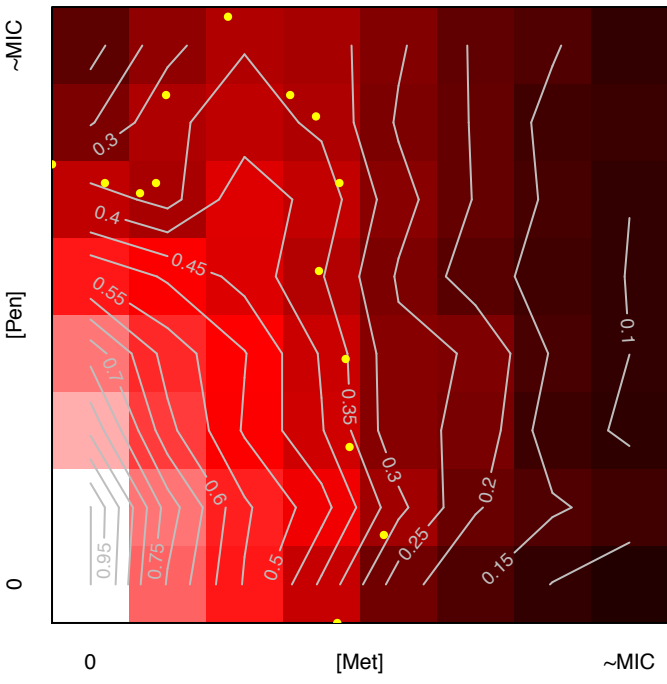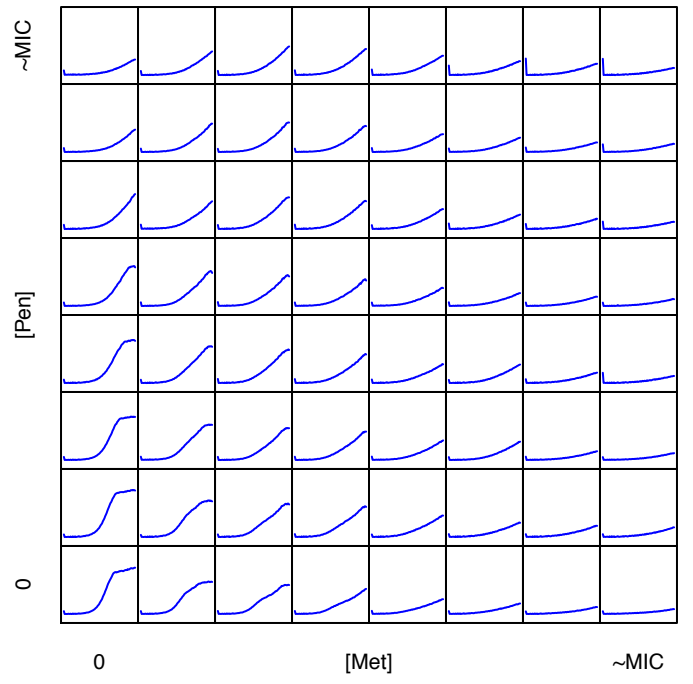

$\alpha = 1.971104$

cli

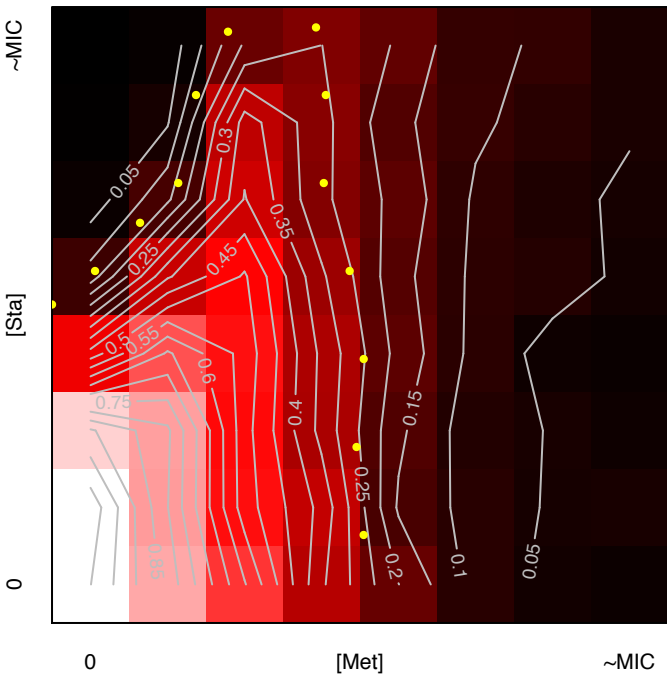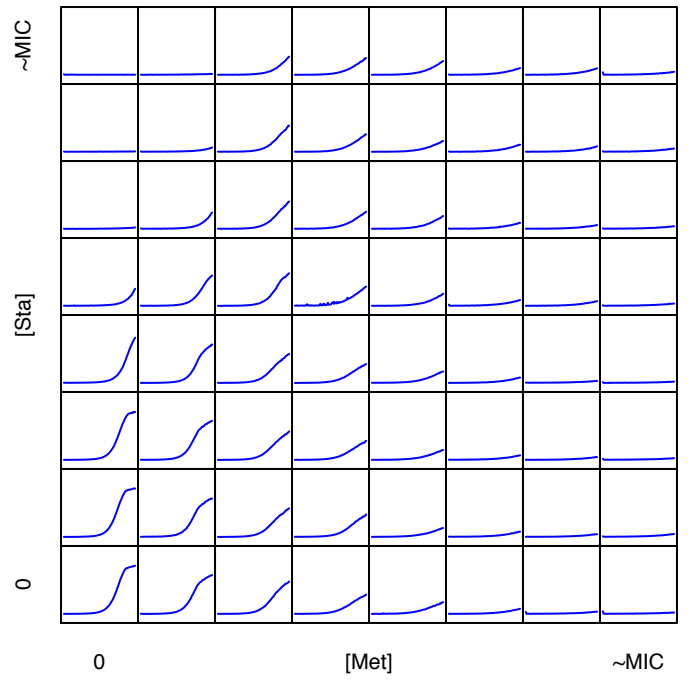

$\alpha = 1.01005$

cli

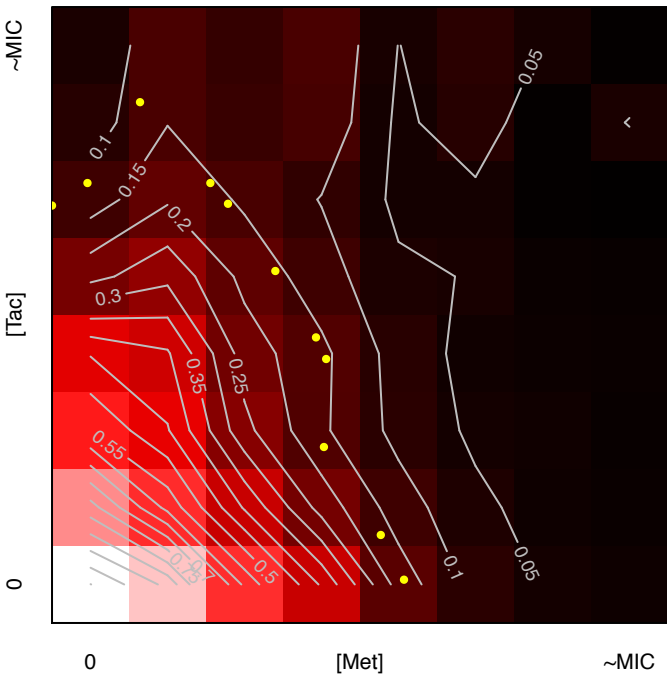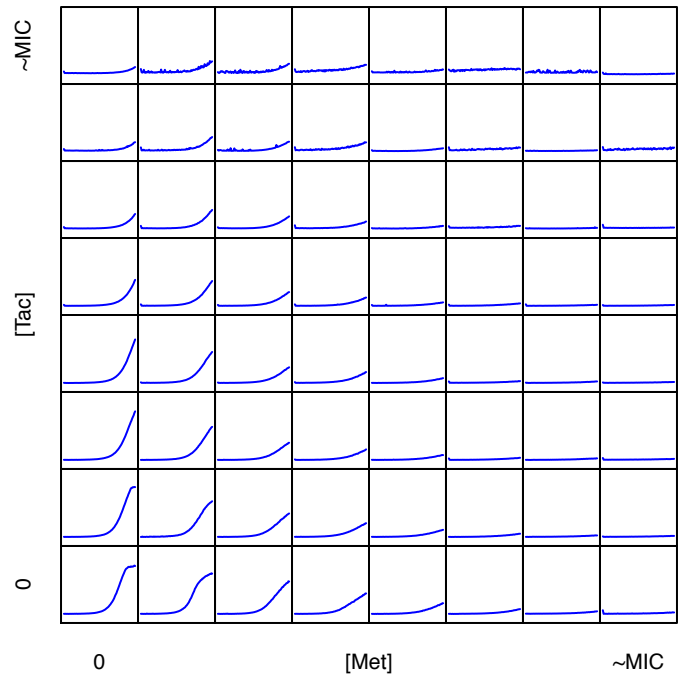

$\alpha = 1.892998$

cli

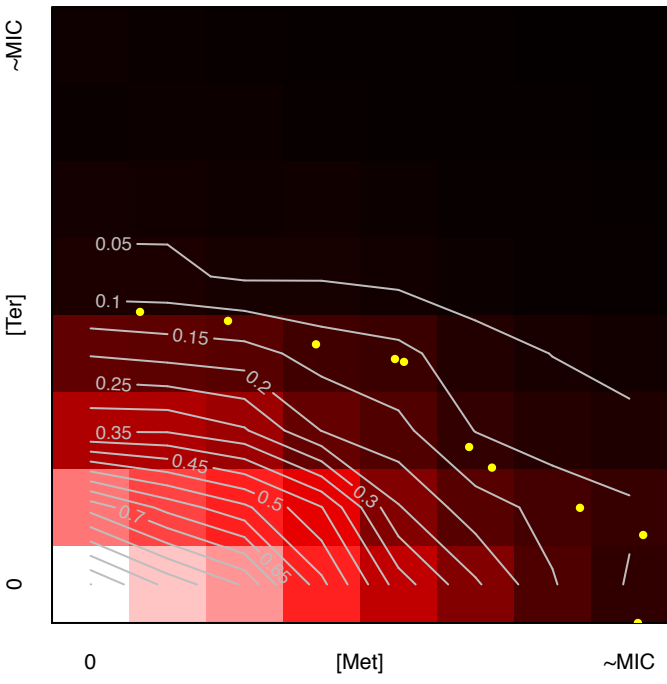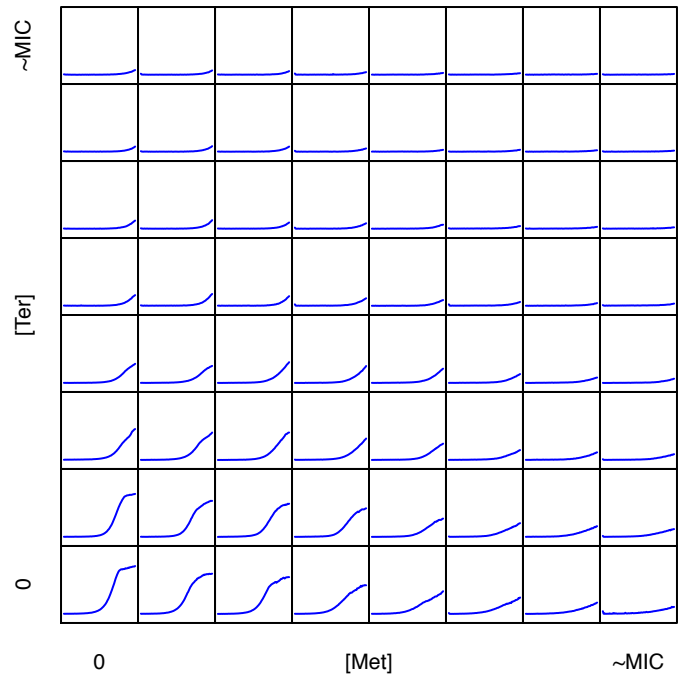

$\alpha = -0.2795345$

cliii

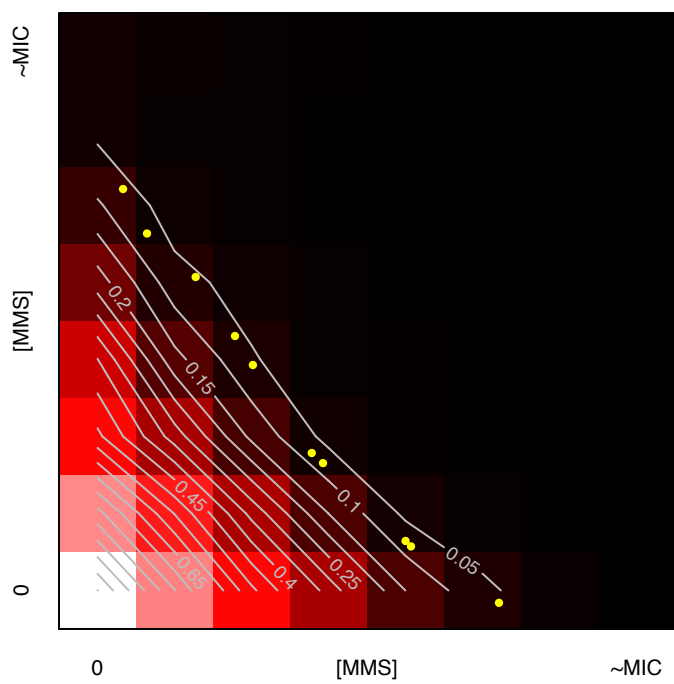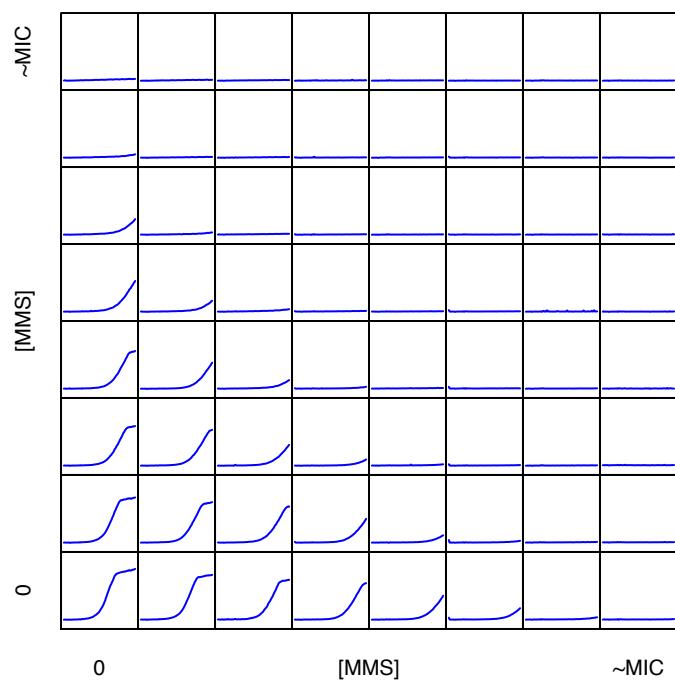

$\alpha = 0.3130769$

cliv

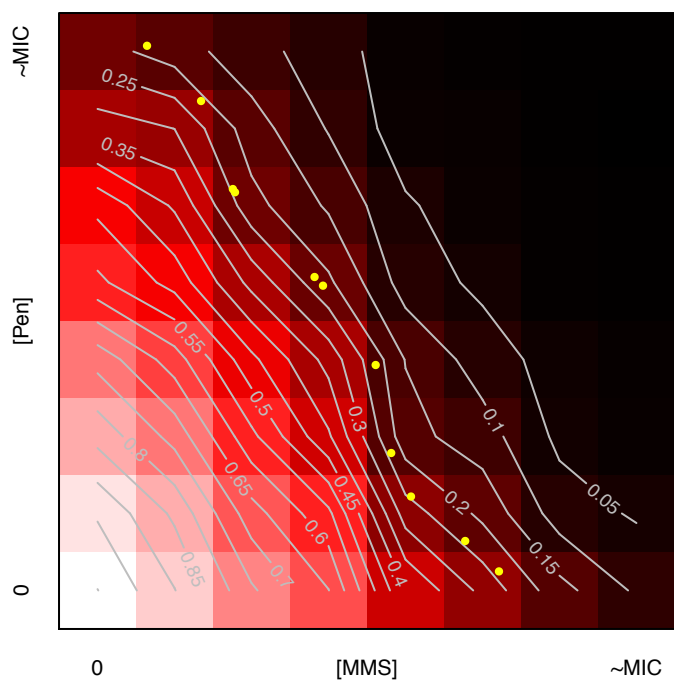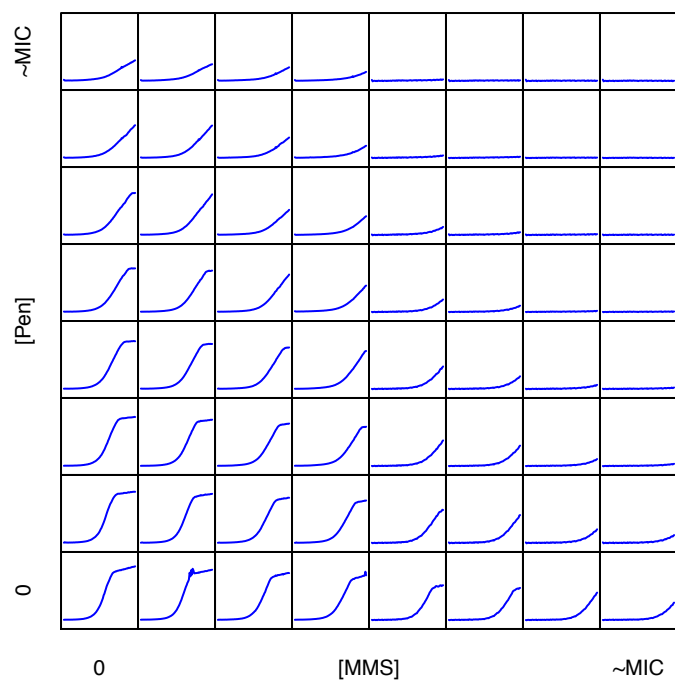

$\alpha = 1.046222$

clv

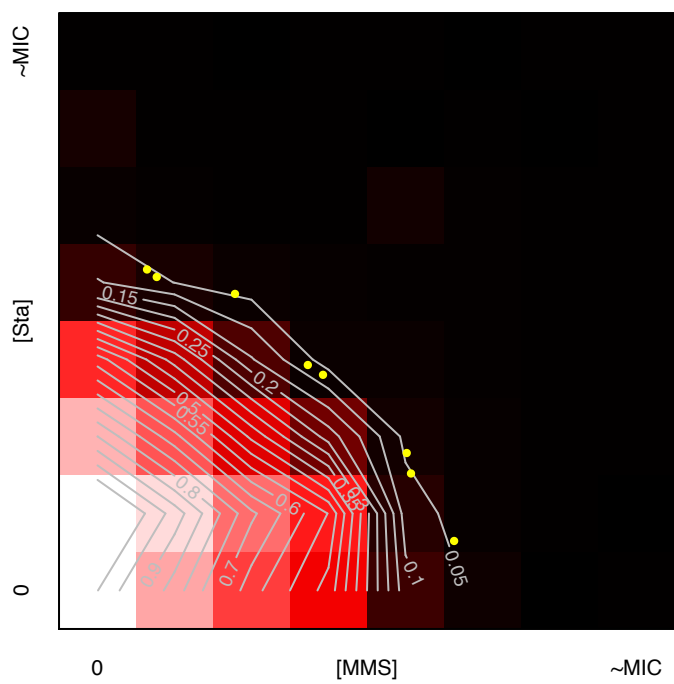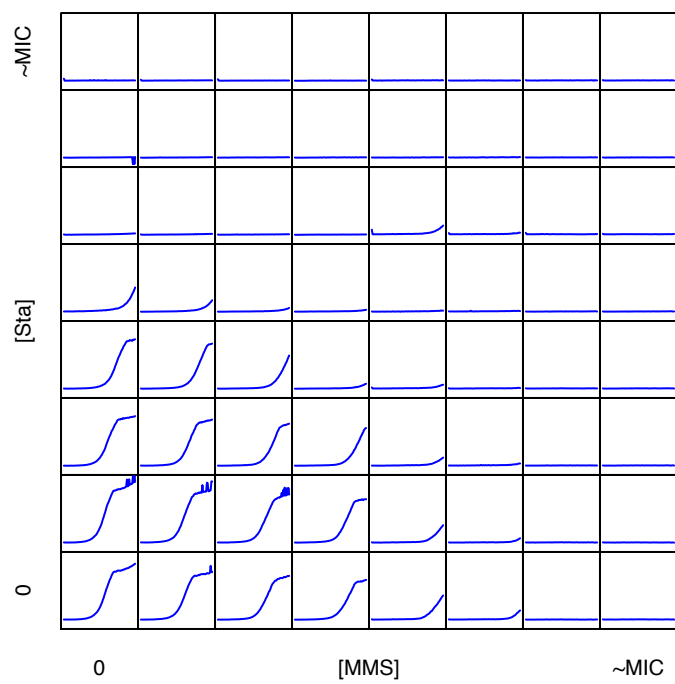

$\alpha = 0.8951513$

clvi

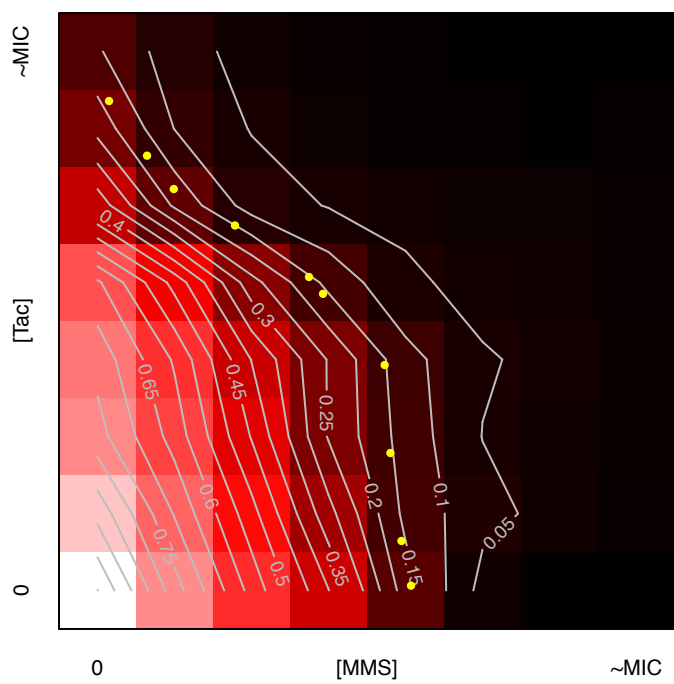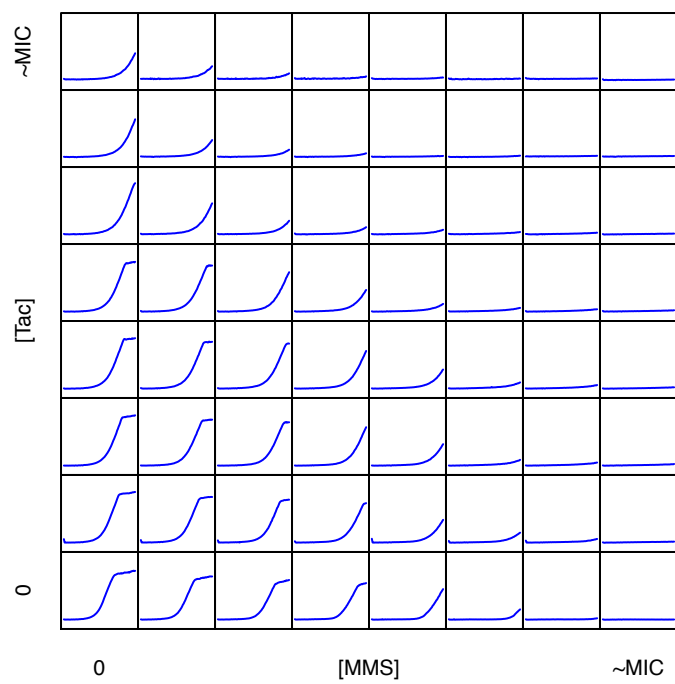

$\alpha = 0.6074653$

clvii

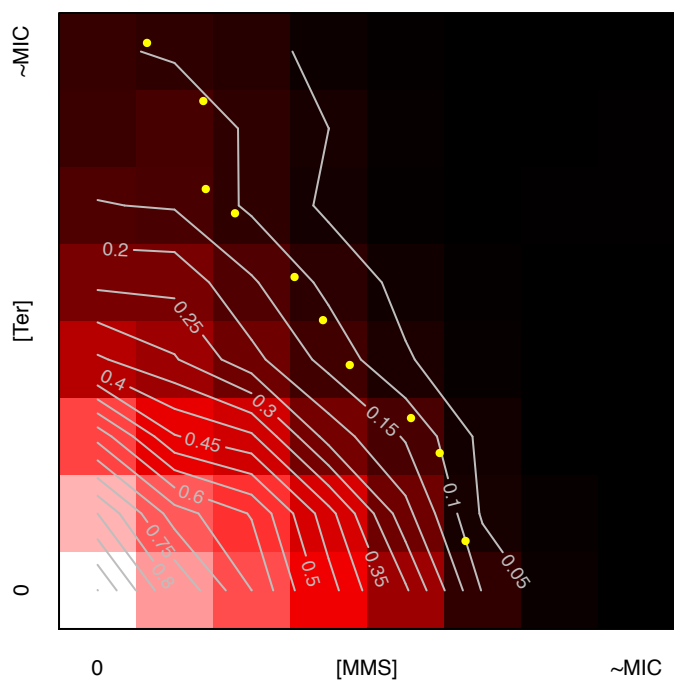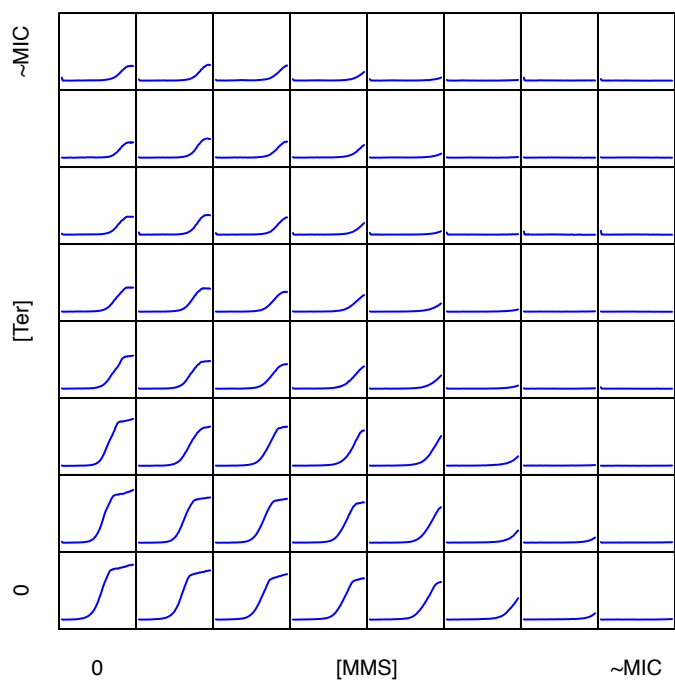

$\alpha = -0.4520904$

clviii

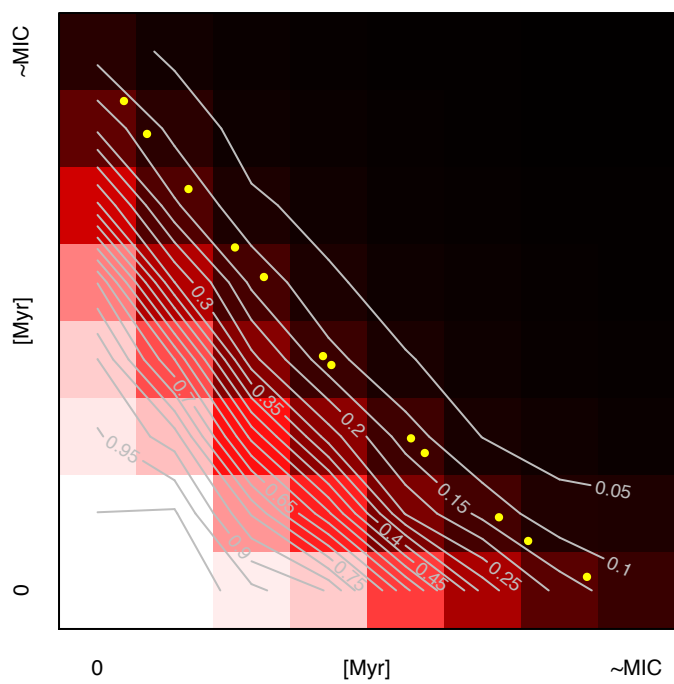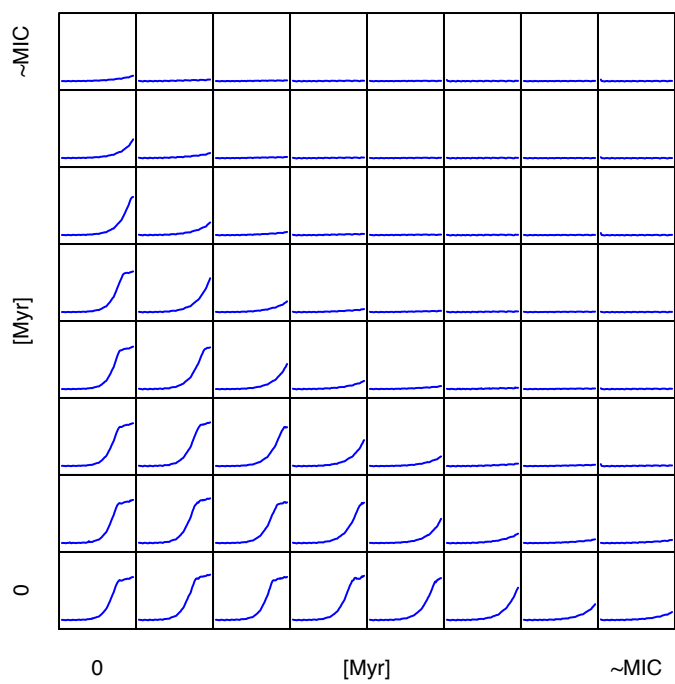

$\alpha = 0.2242276$

clix

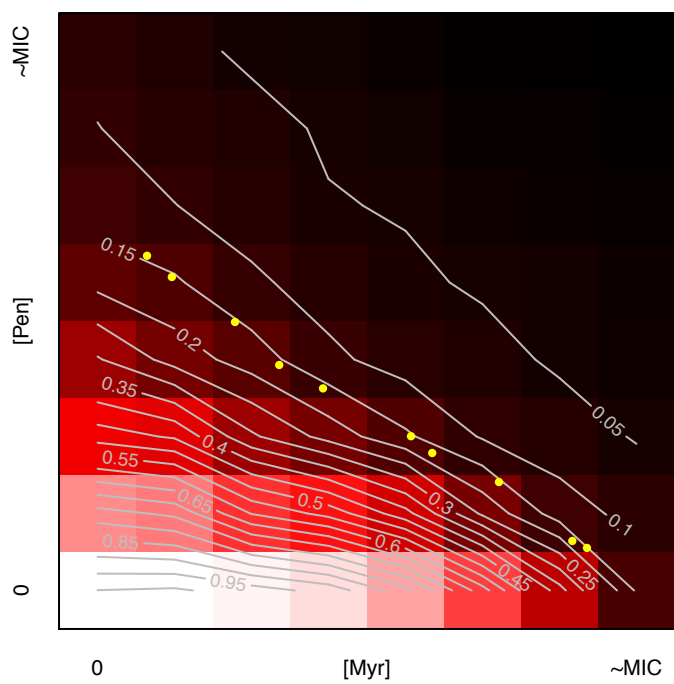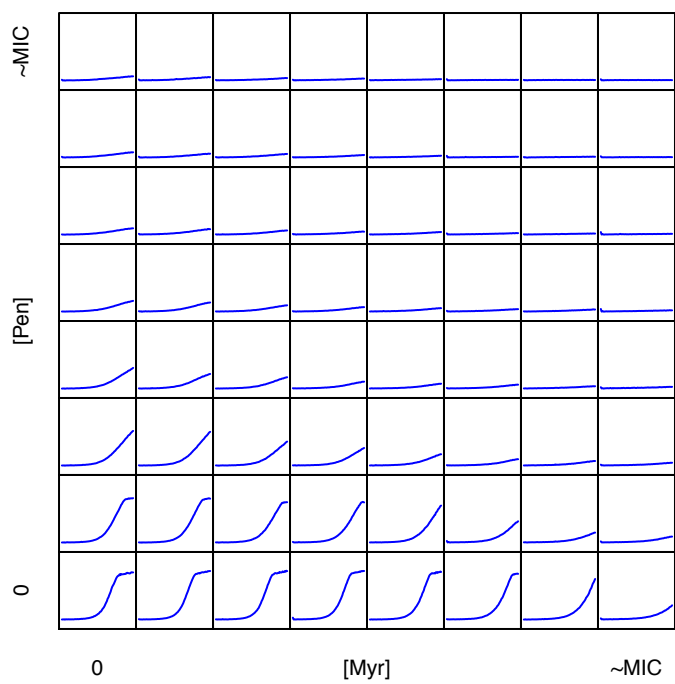

$\alpha = 1.276457$

clx

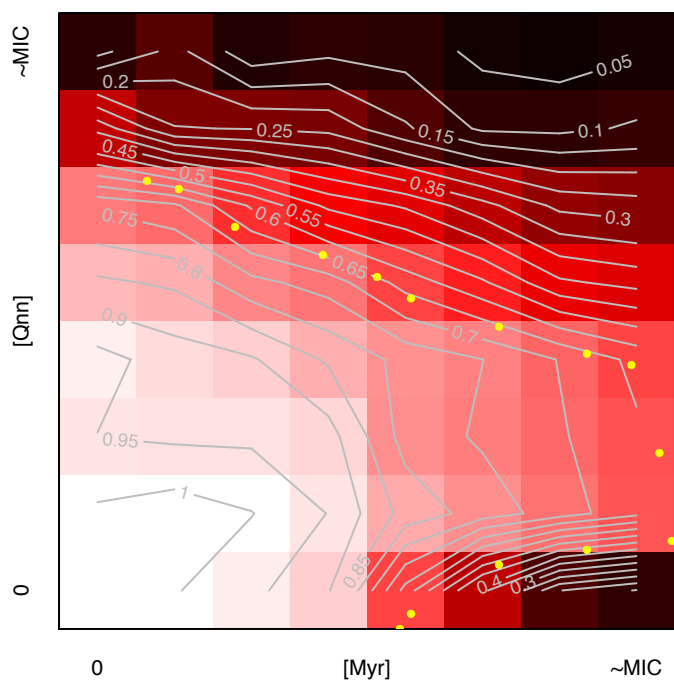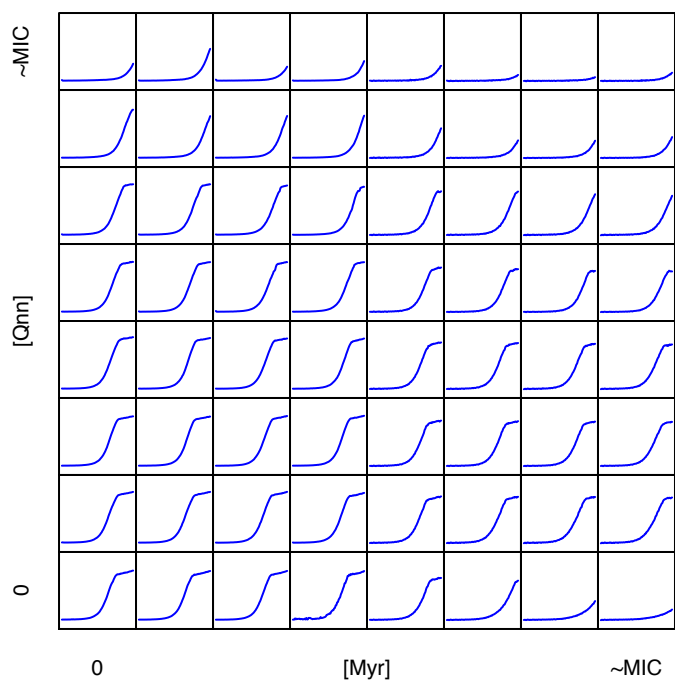



$\alpha = -0.5575599$

clxi

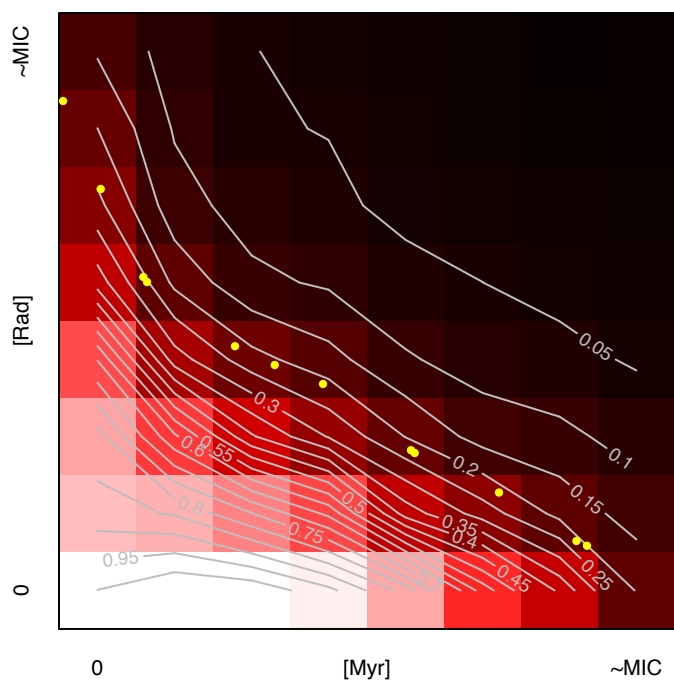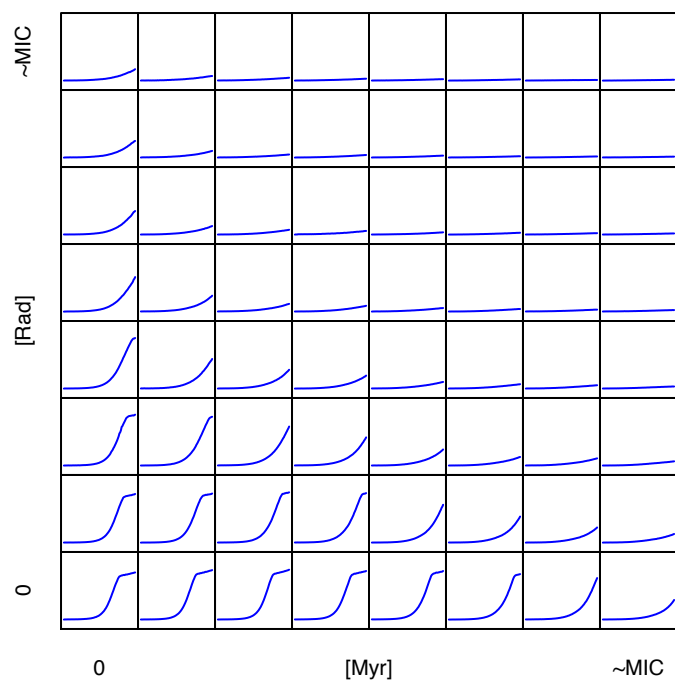

$\alpha = 2.480298$

clxii

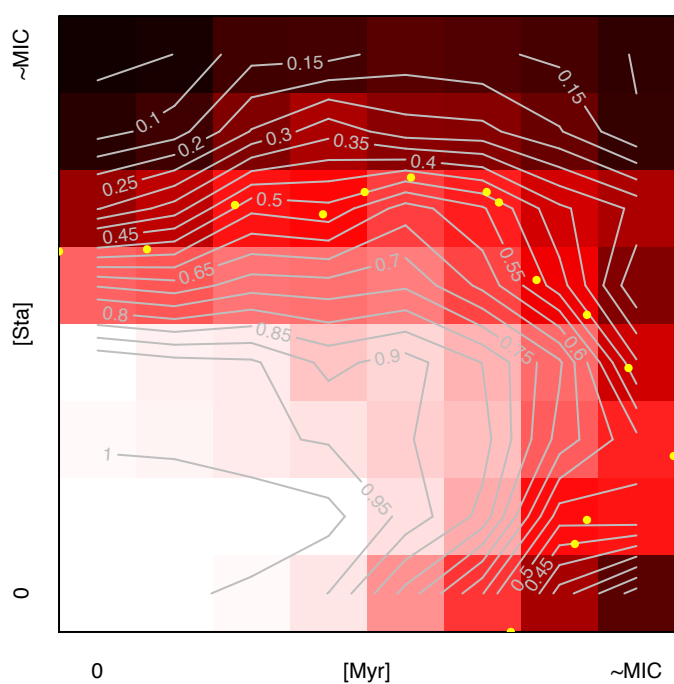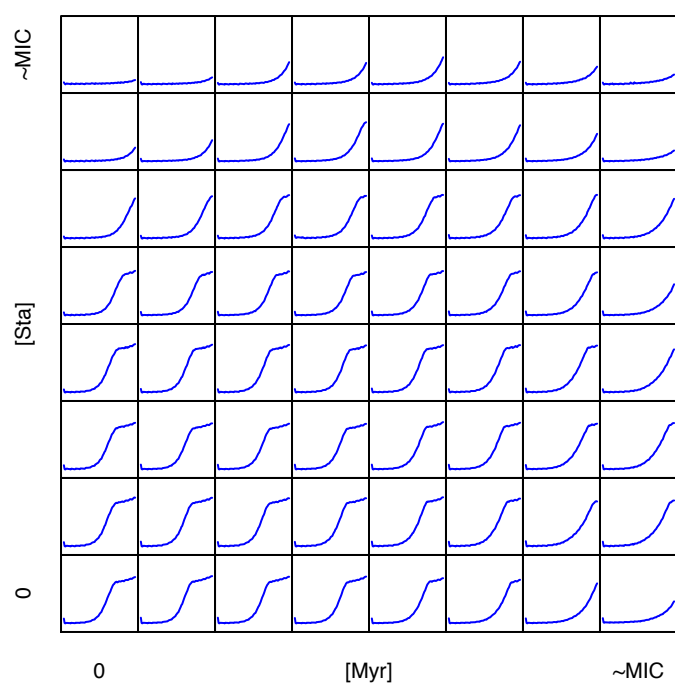

$\alpha = -0.03383627$

clxiii

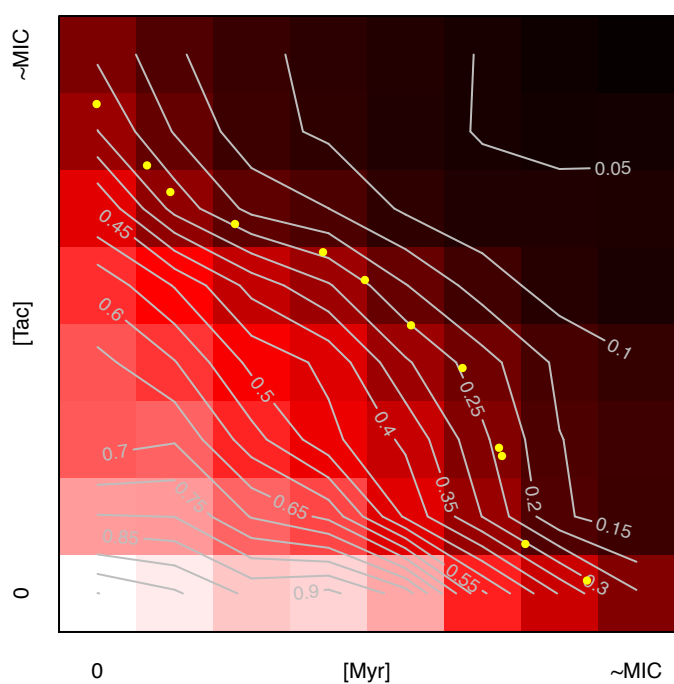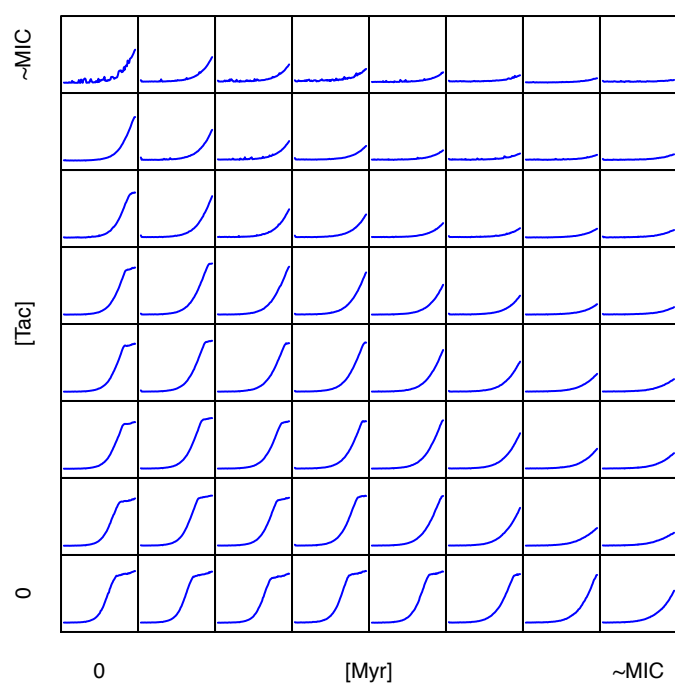

$\alpha = 2.348202$

clxiv

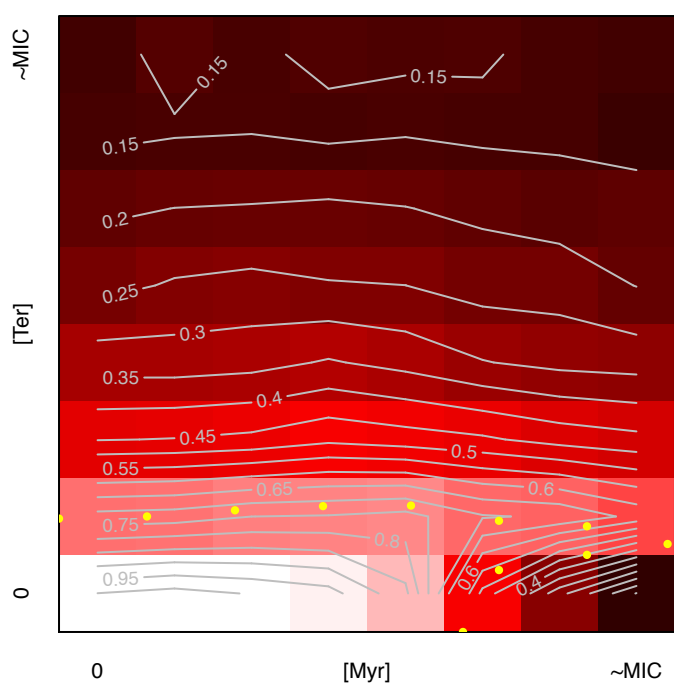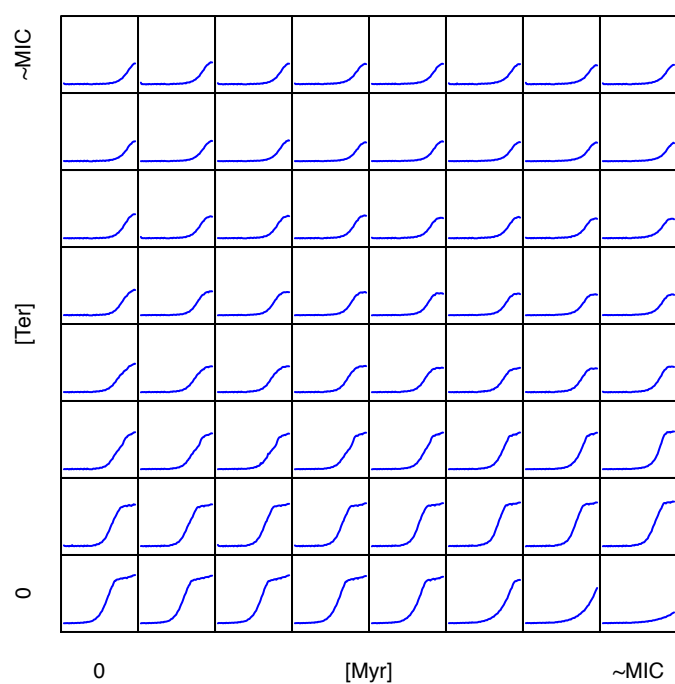

$\alpha = -0.897911$

clxv

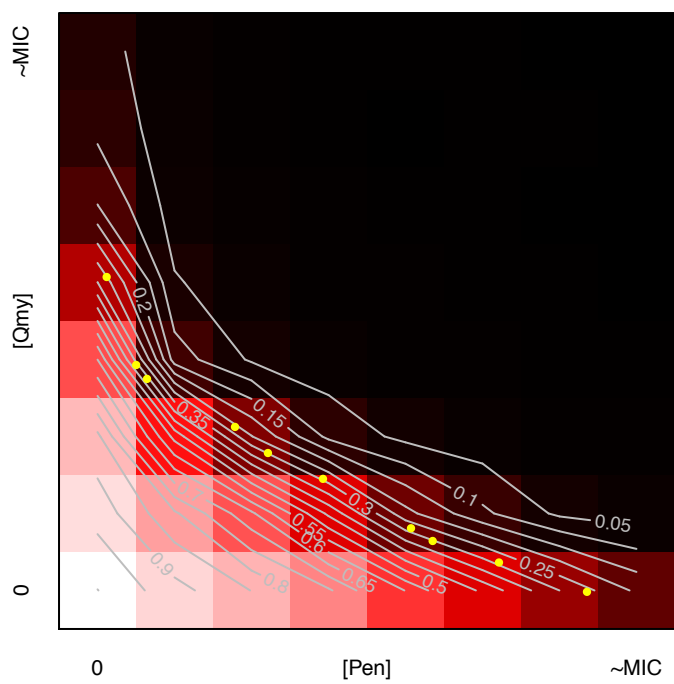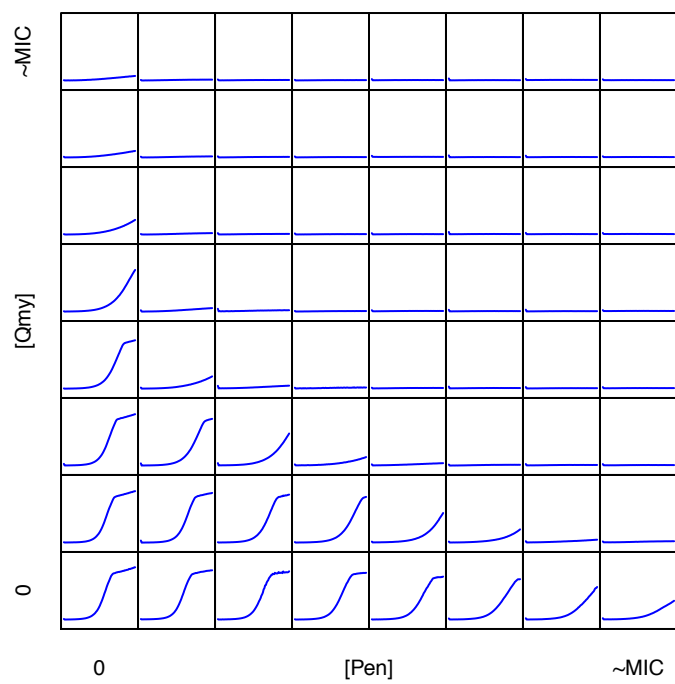

$\alpha = -1.286947$

clxvi

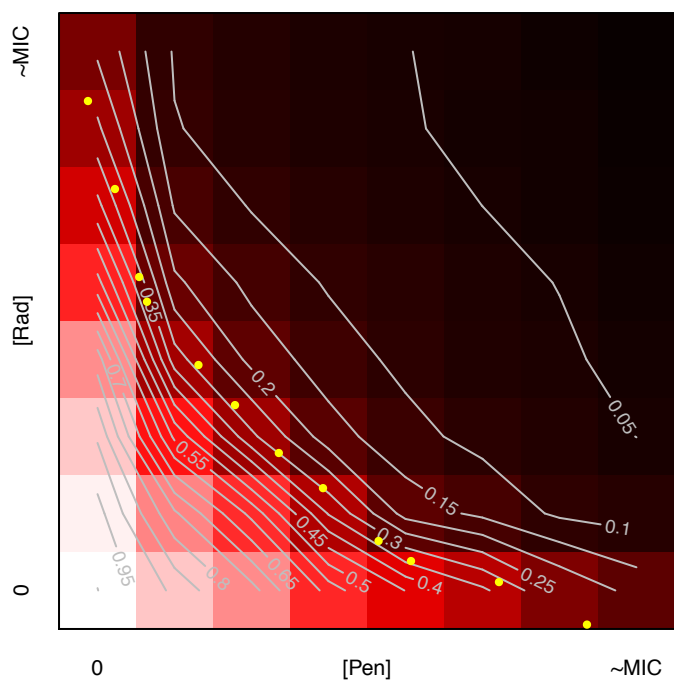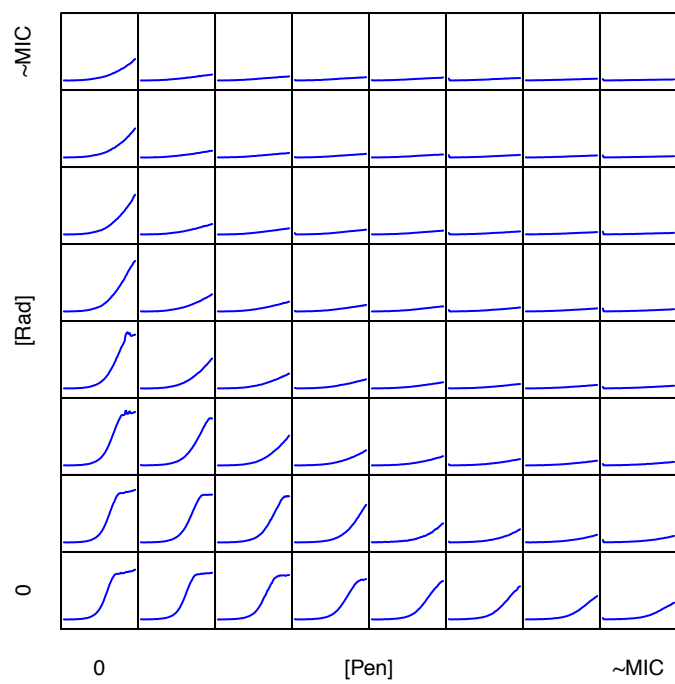

$\alpha = -0.2656607$

clxvii

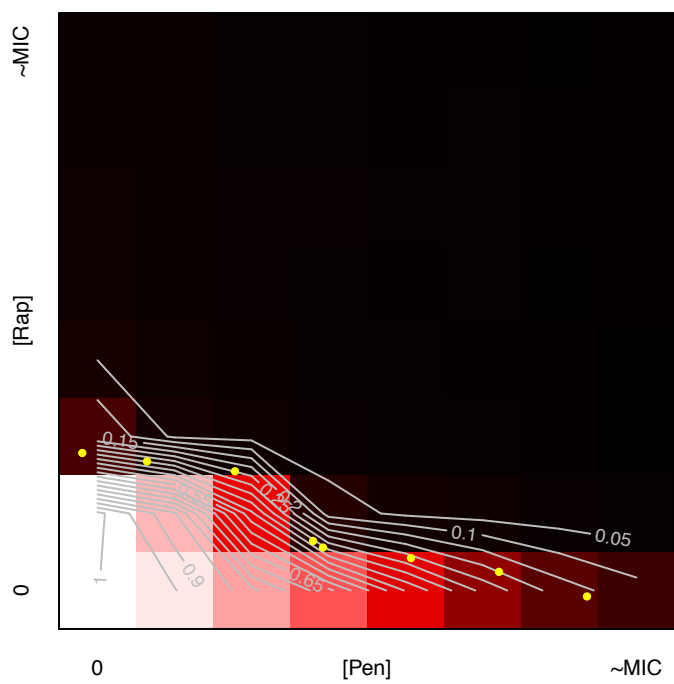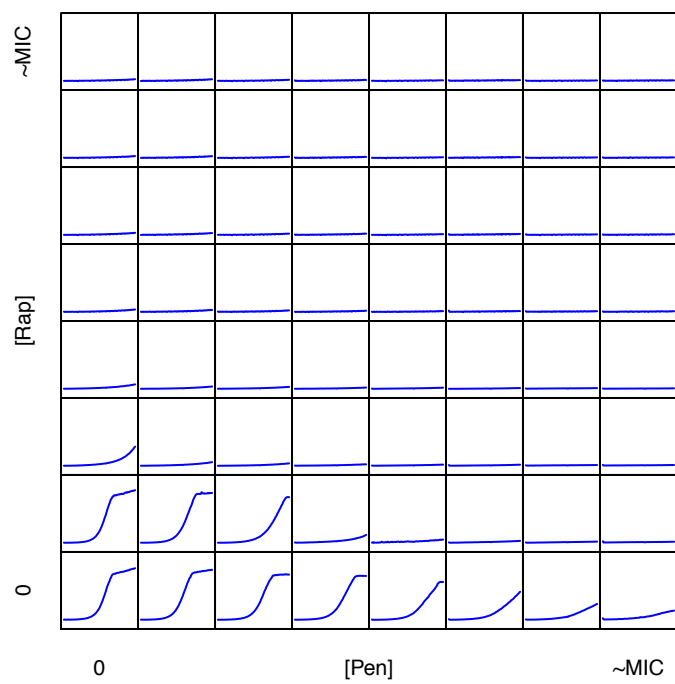

$\alpha = -0.8713384$

clxviii

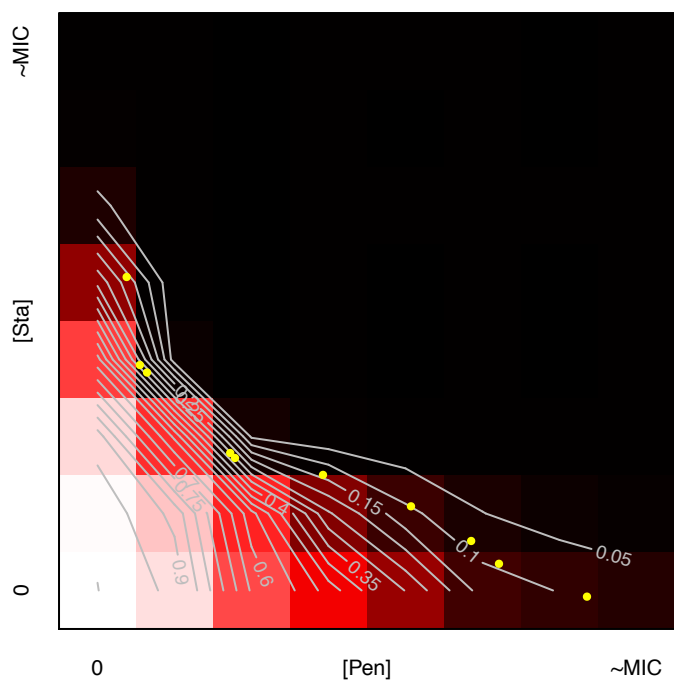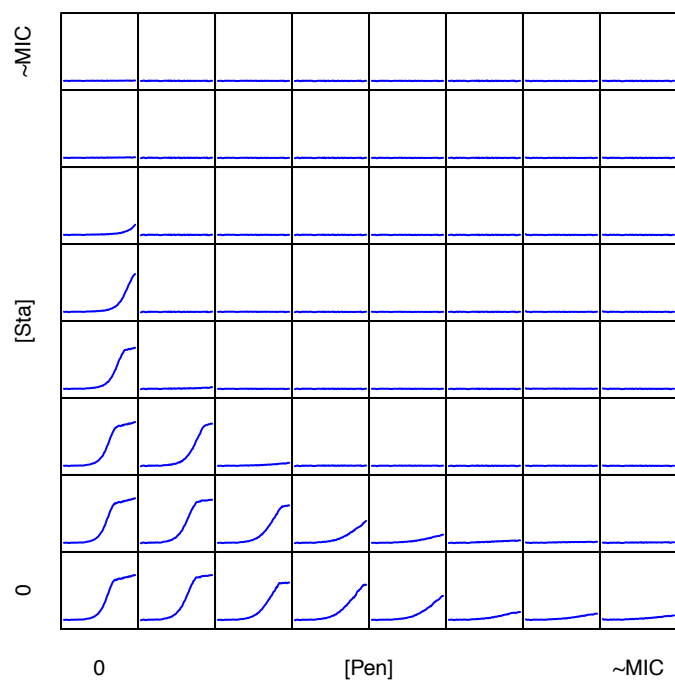

$\alpha = -1.423424$

clxix

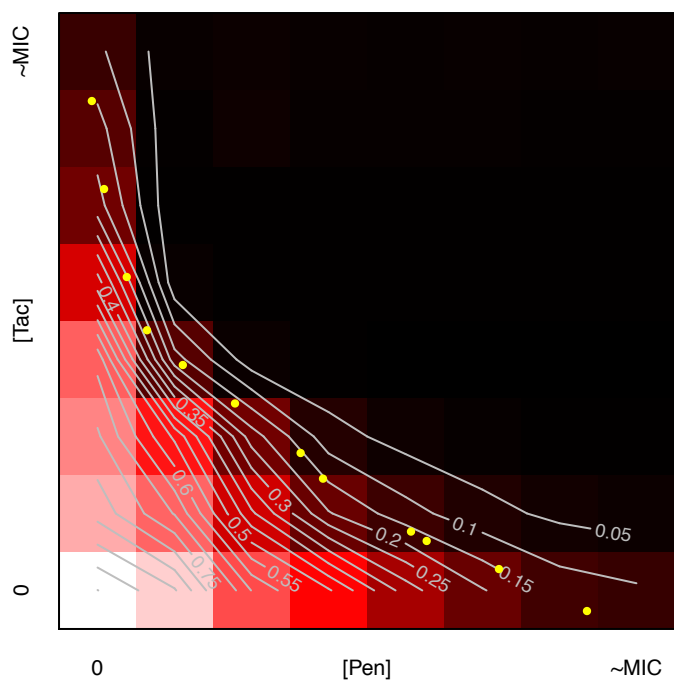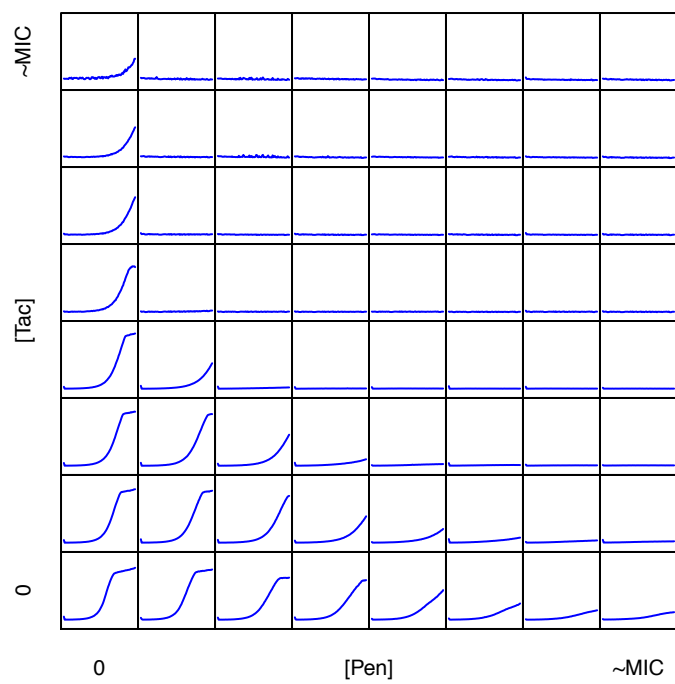

$\alpha = -1.516180$

clxx

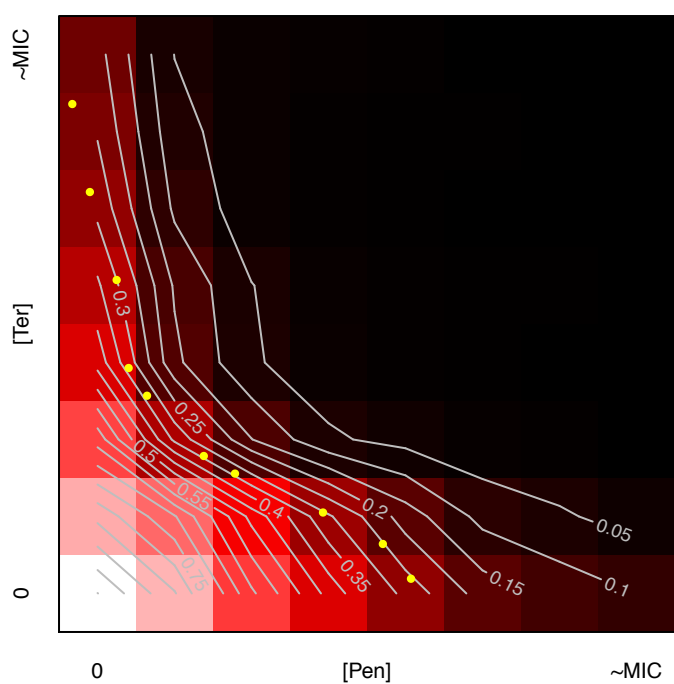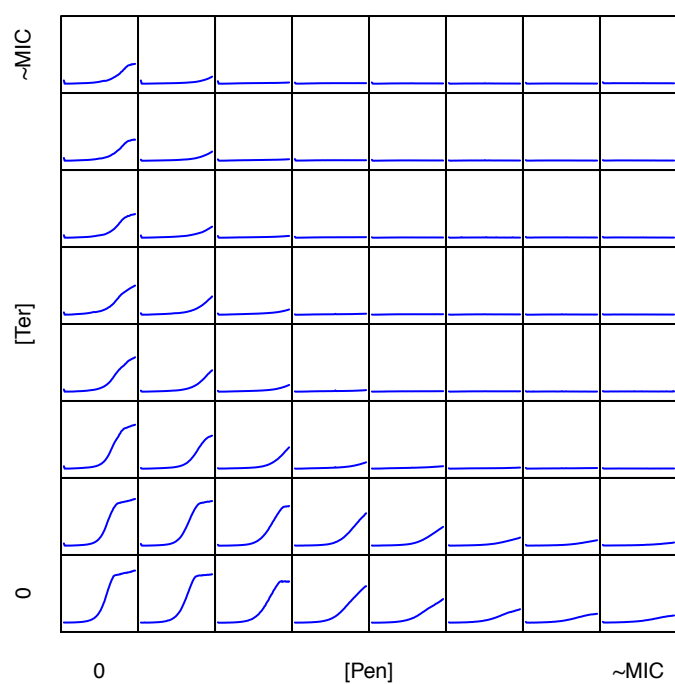

$\alpha = -0.2614573$

clxxi

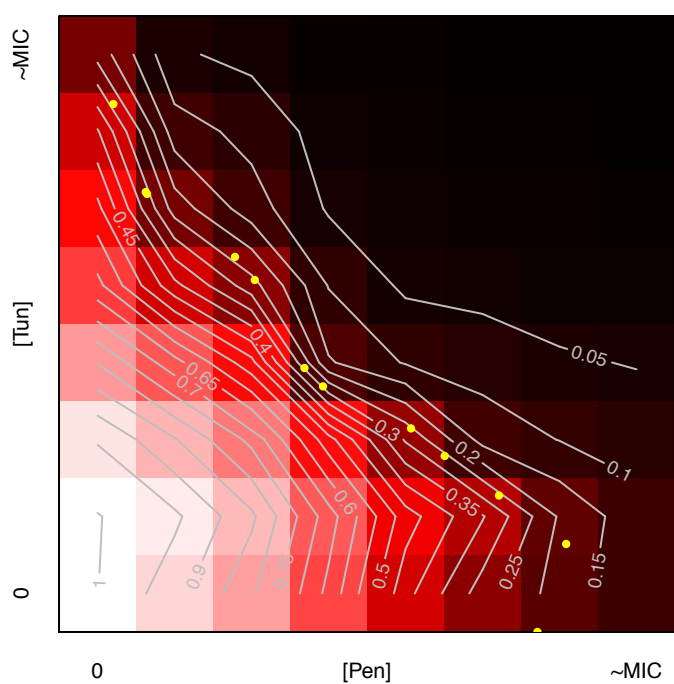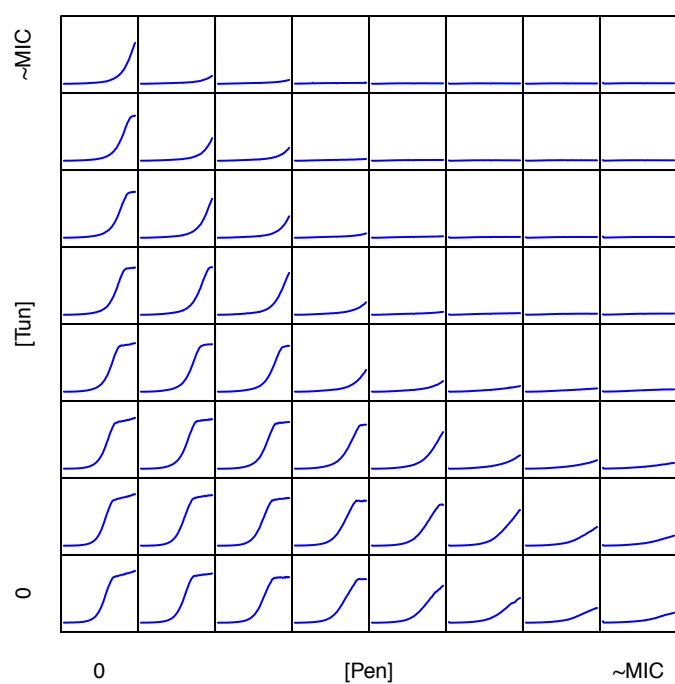

$\alpha = -0.2214206$

clxxii

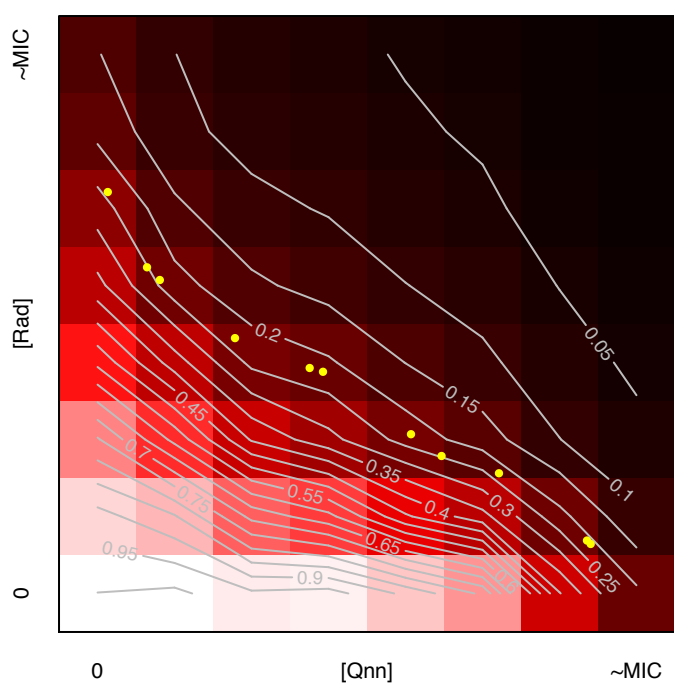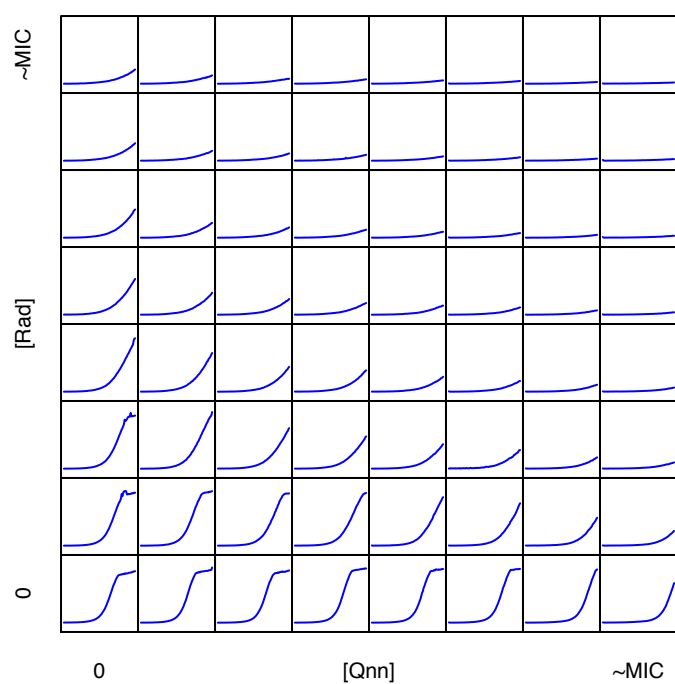

$\alpha = -0.3110584$ 

clxxiii

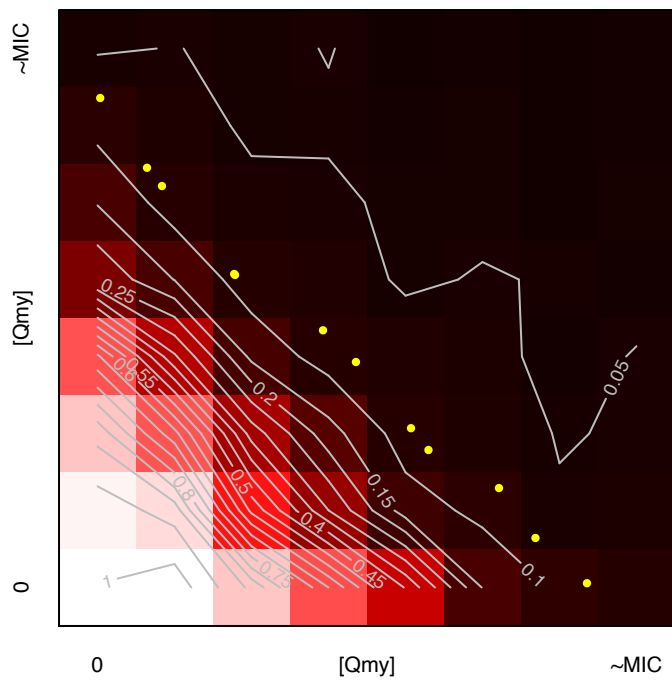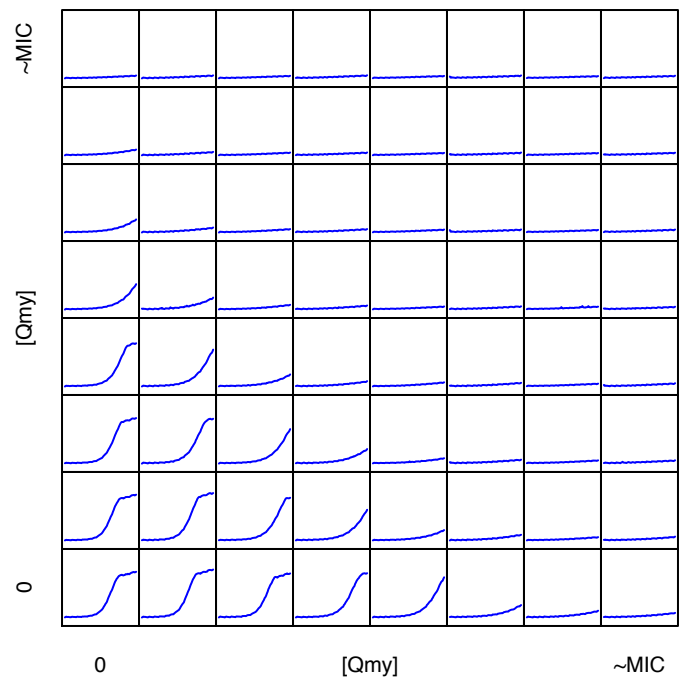 $\alpha = 2.147222$ 

clxxiv

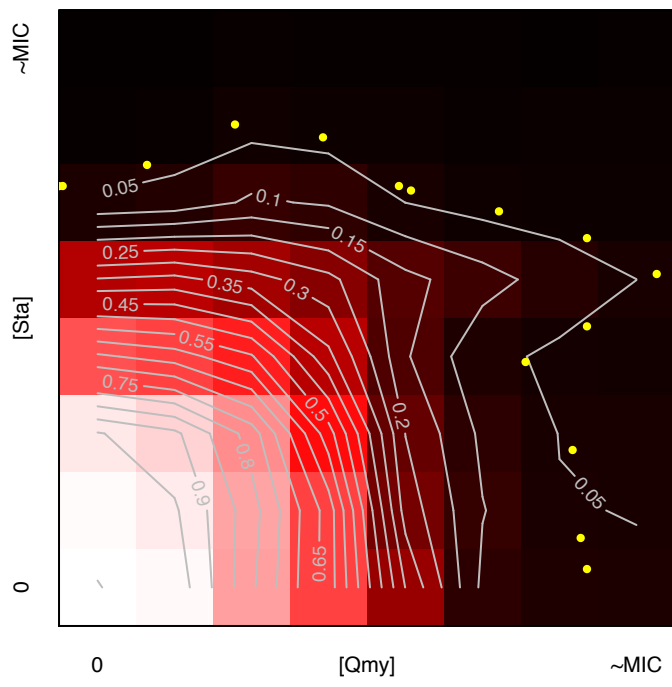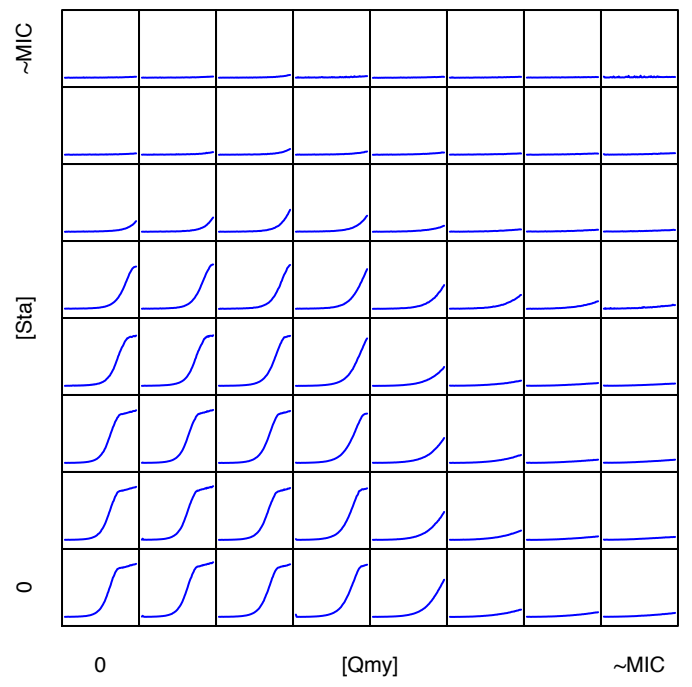 $\alpha = 0.1918958$ 

clxxv

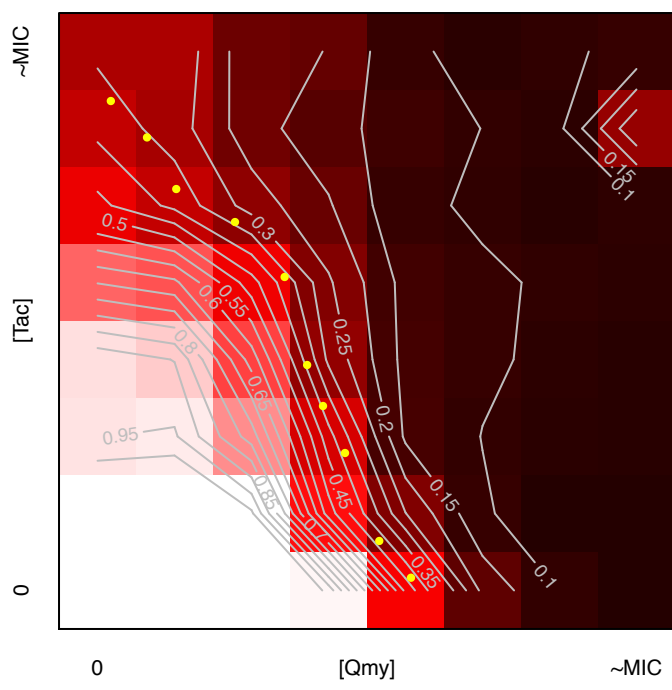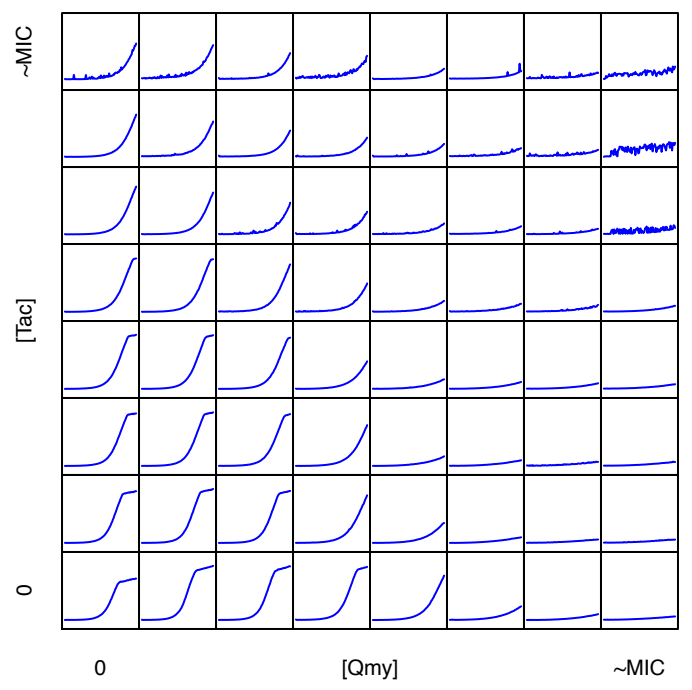 $\alpha = -1.739079$ 

clxxvi

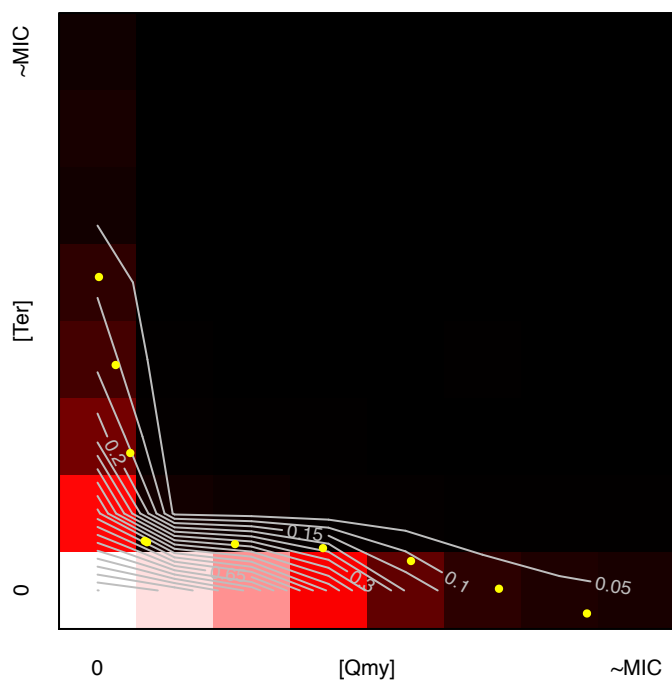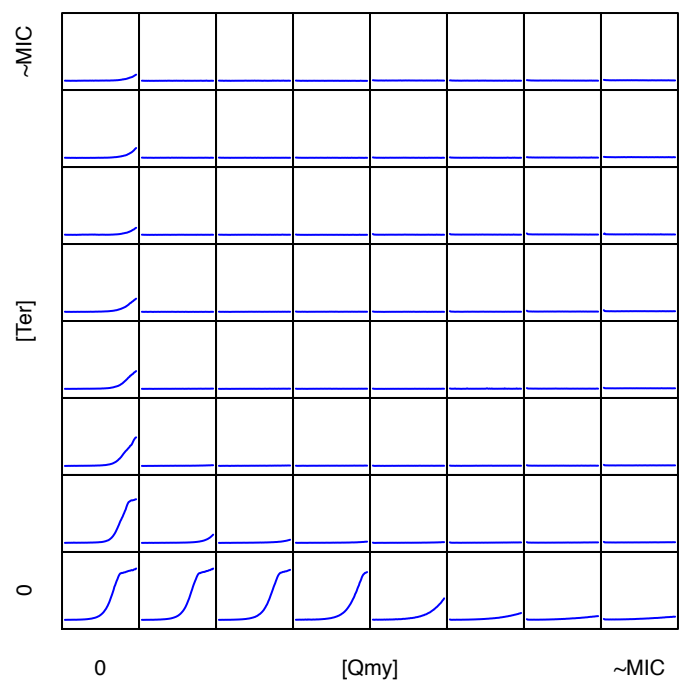

$\alpha = -0.3095396$

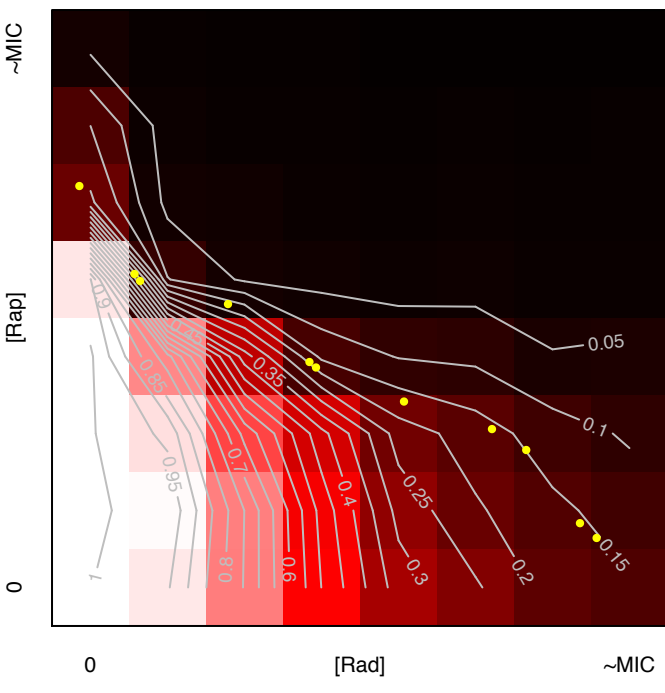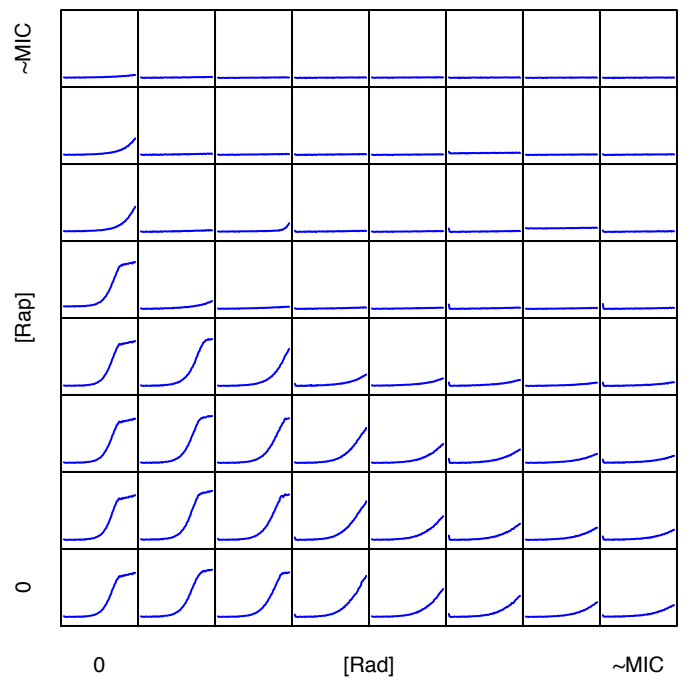

clxxvii

$\alpha = 2.20863$

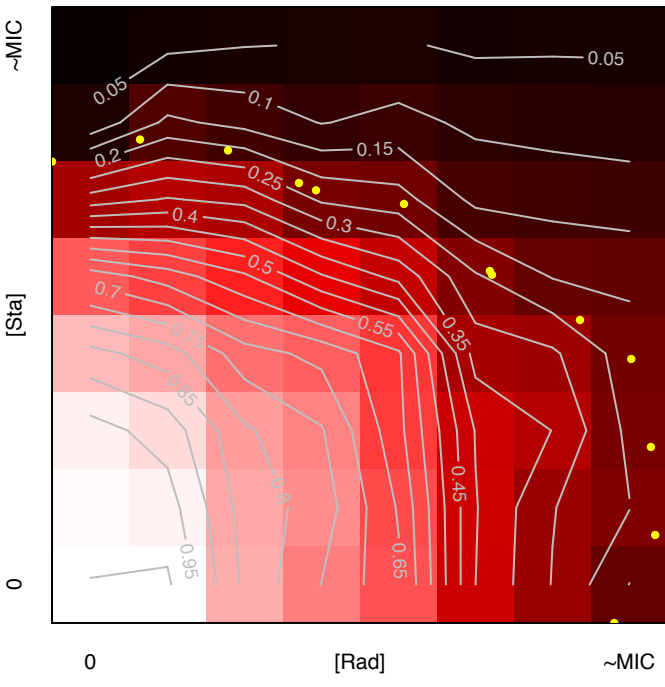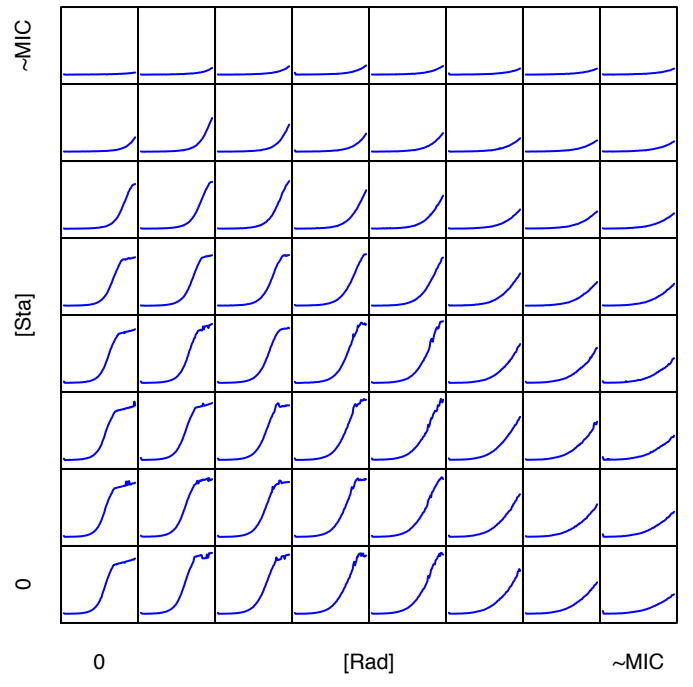

clxxviii

$\alpha = -1.613384$

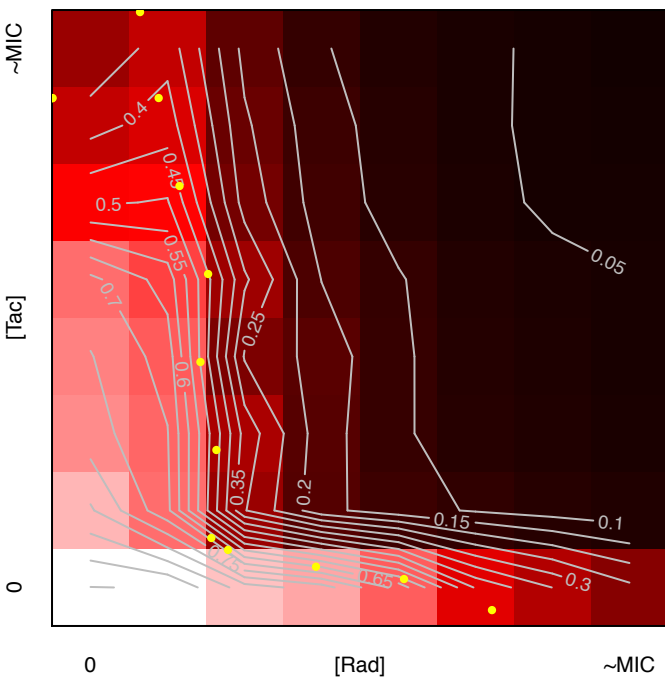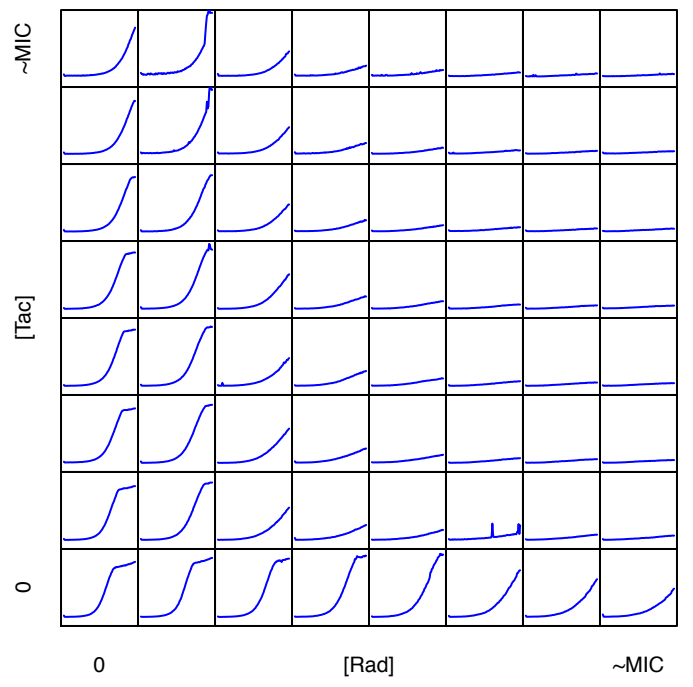

clxxix

$\alpha = -1.581874$

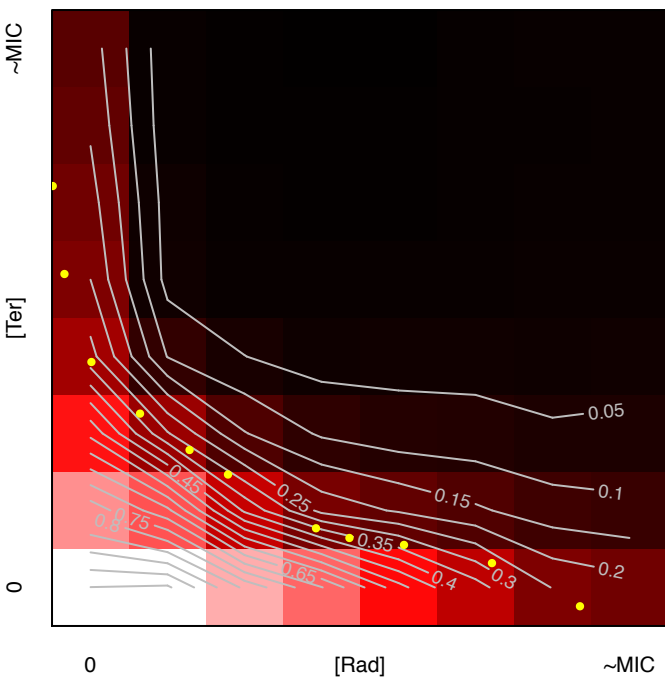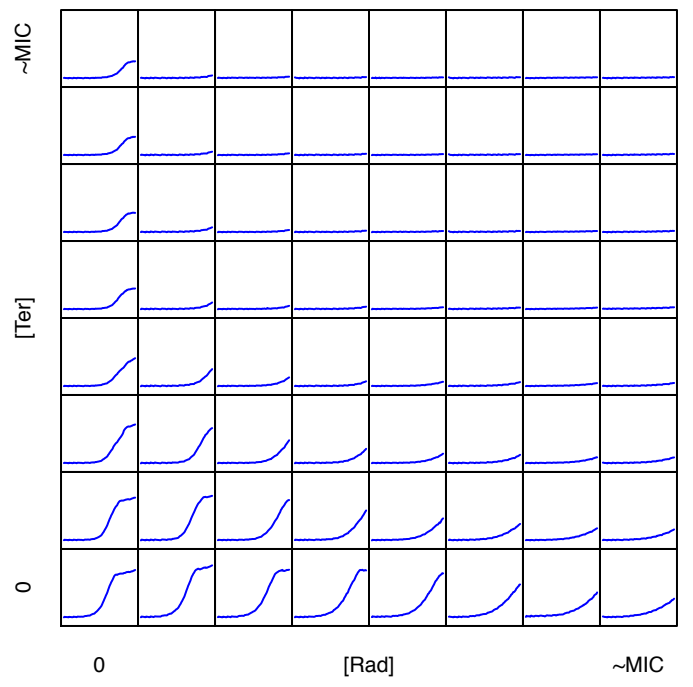

clxxx

$\alpha = -0.3348748$

clxxxxi

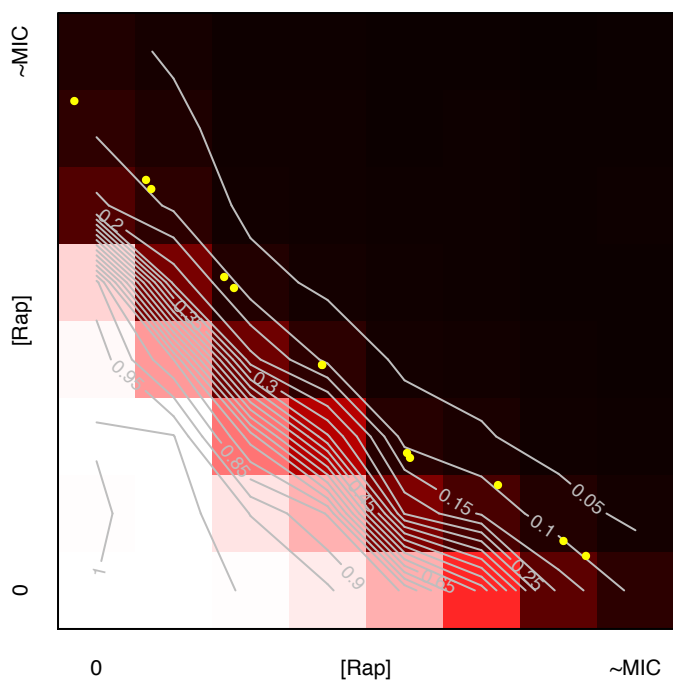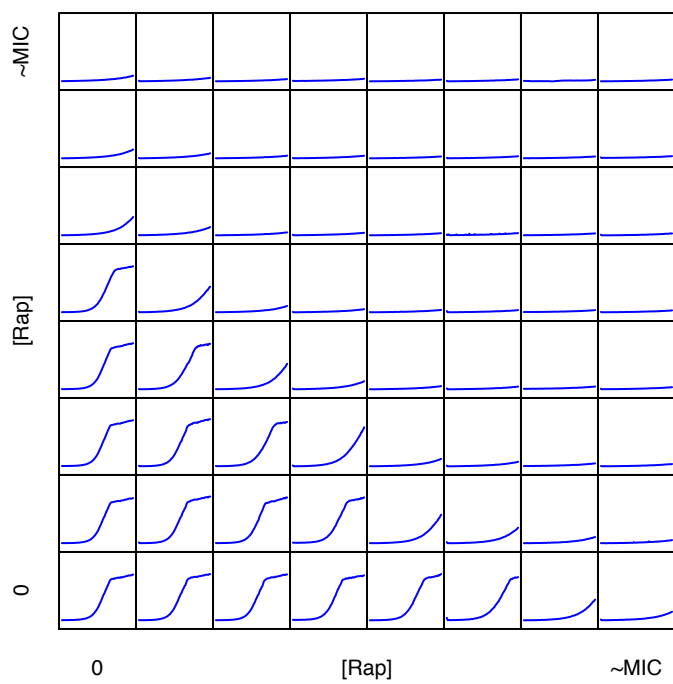

$\alpha = 0.035708$

clxxxii

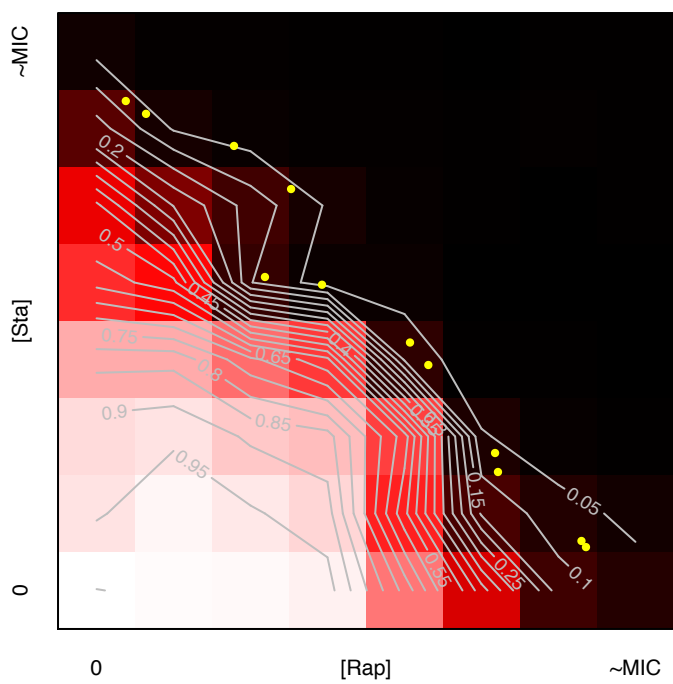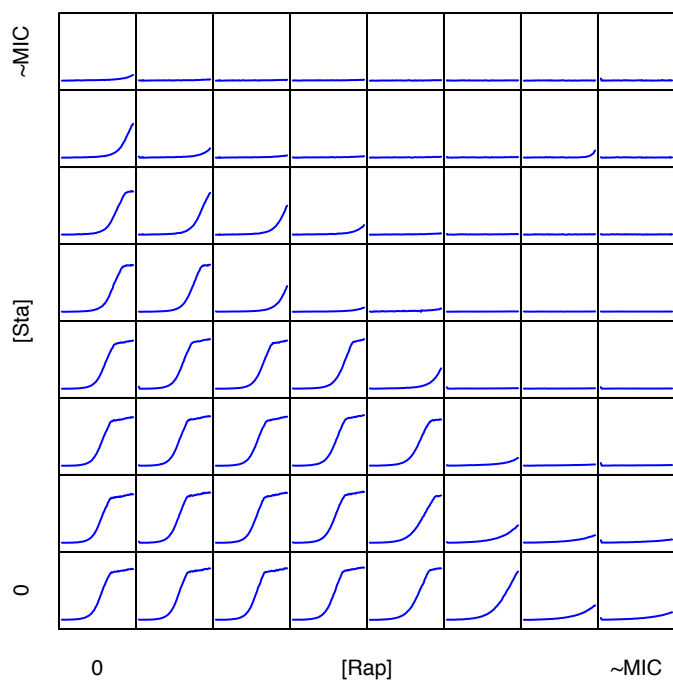

$\alpha = 1.35882$

clxxxiii

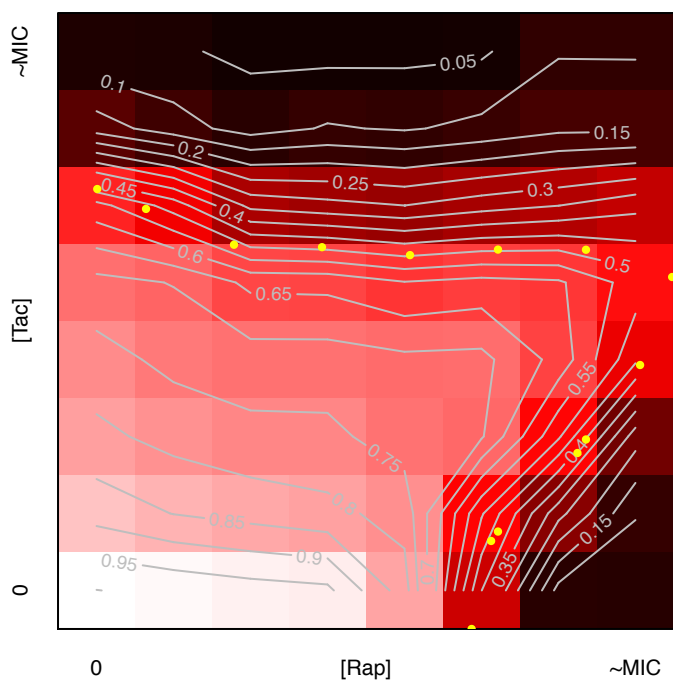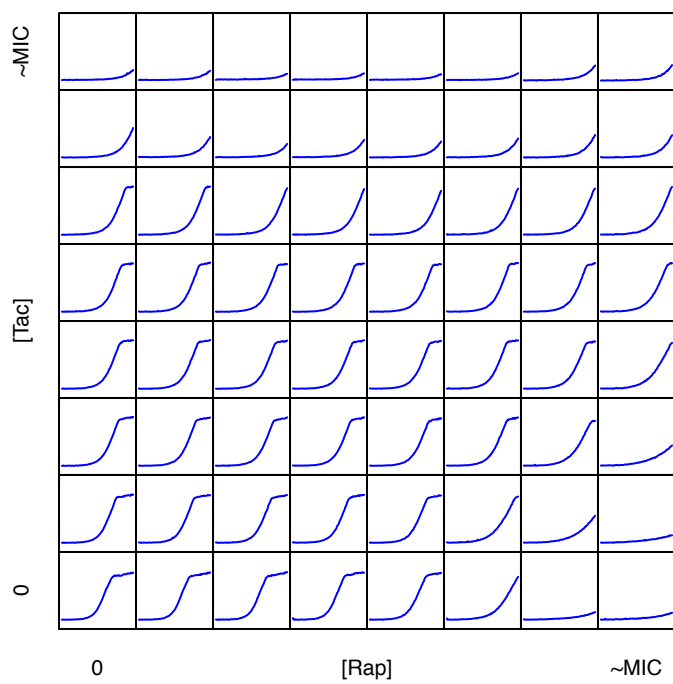

$\alpha = -1.346862$

clxxxiv

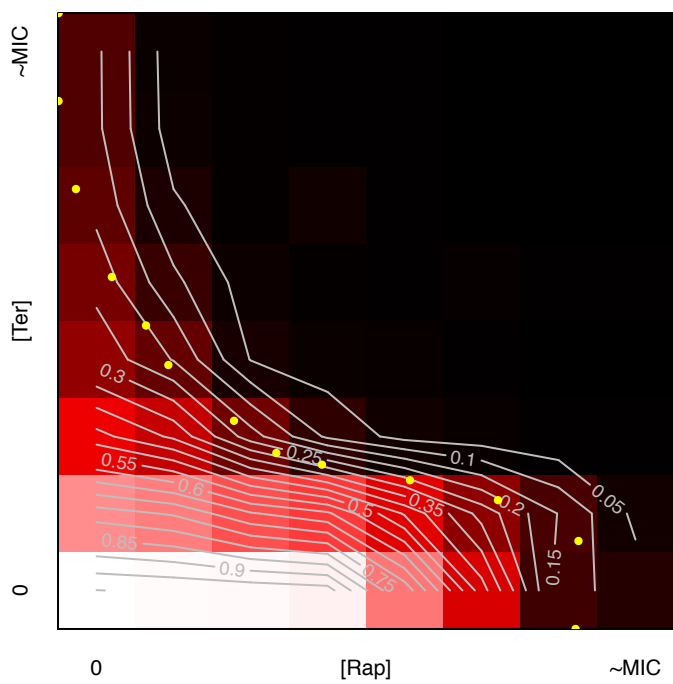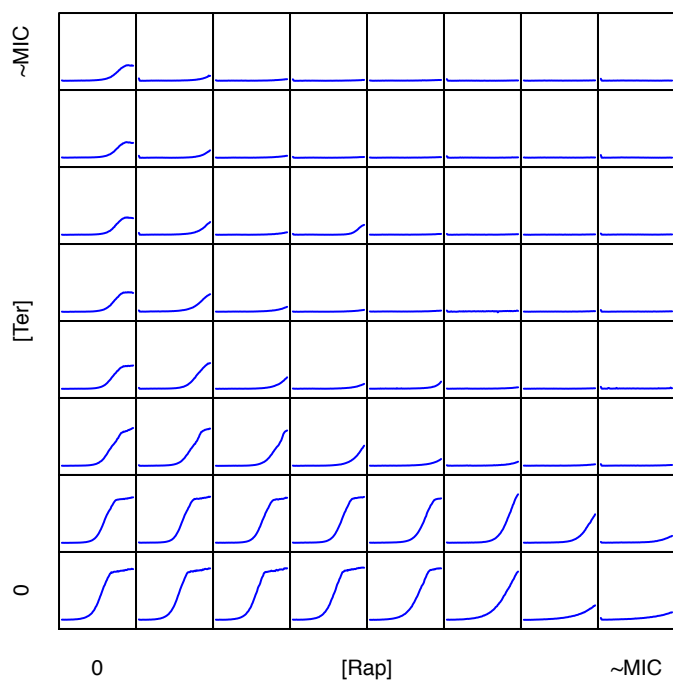

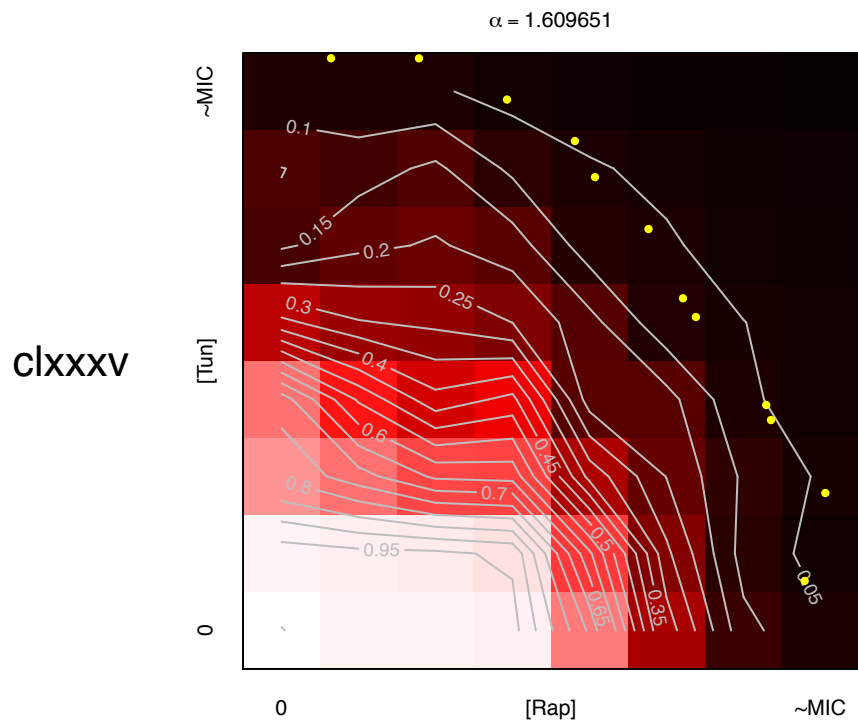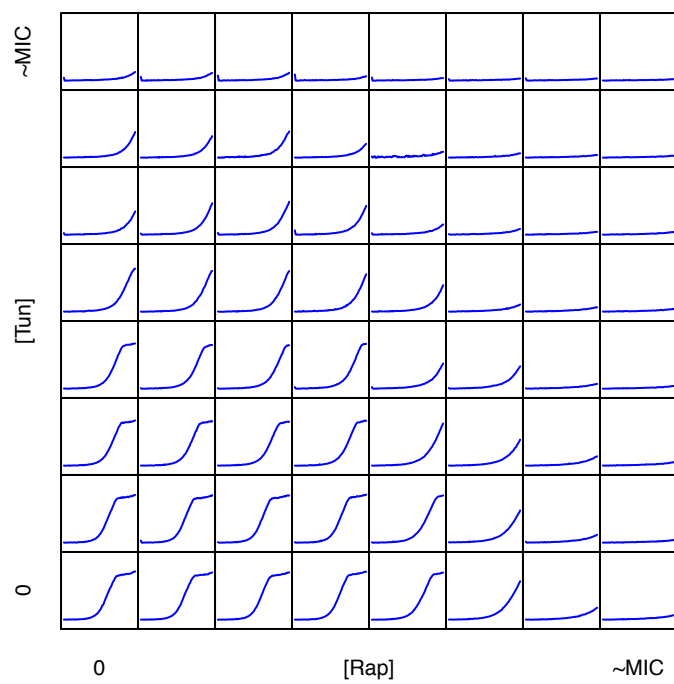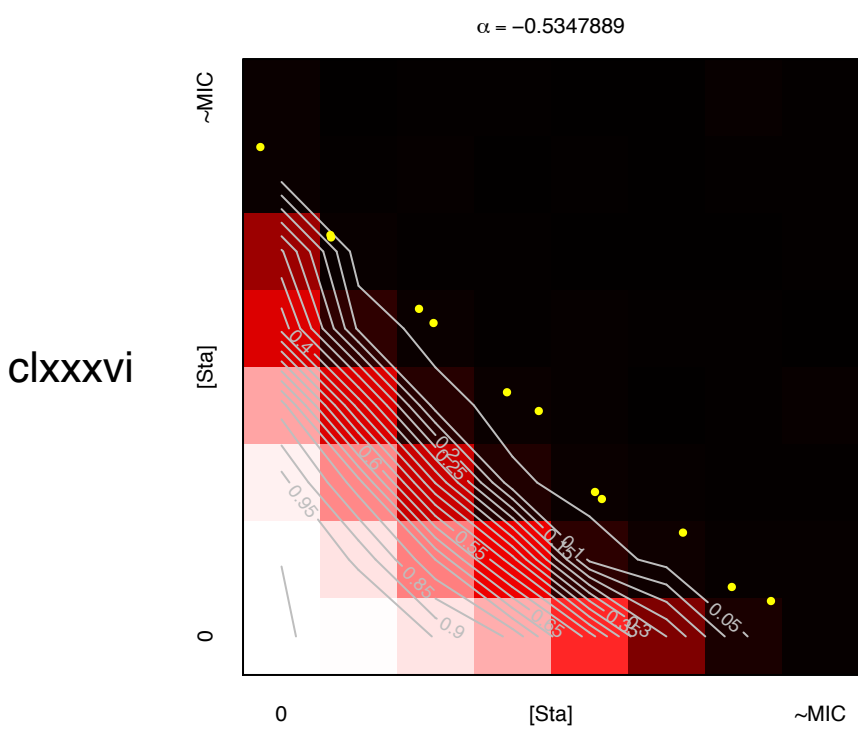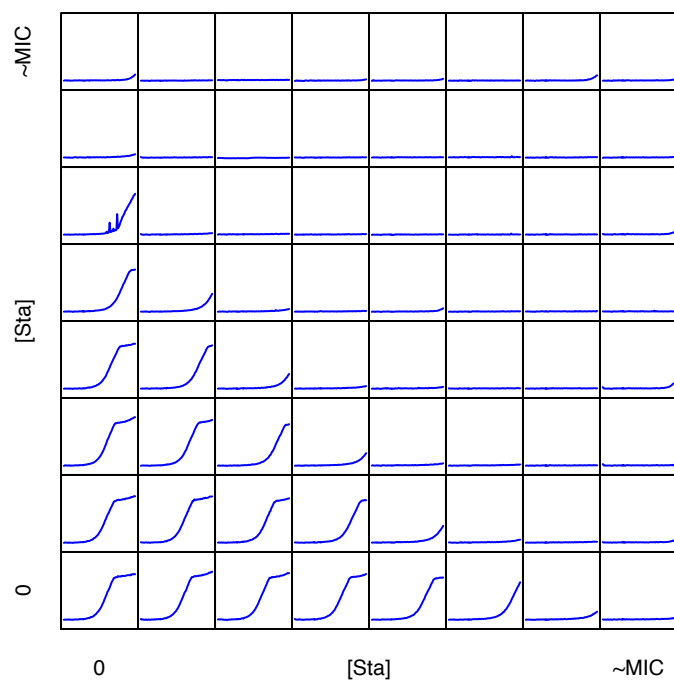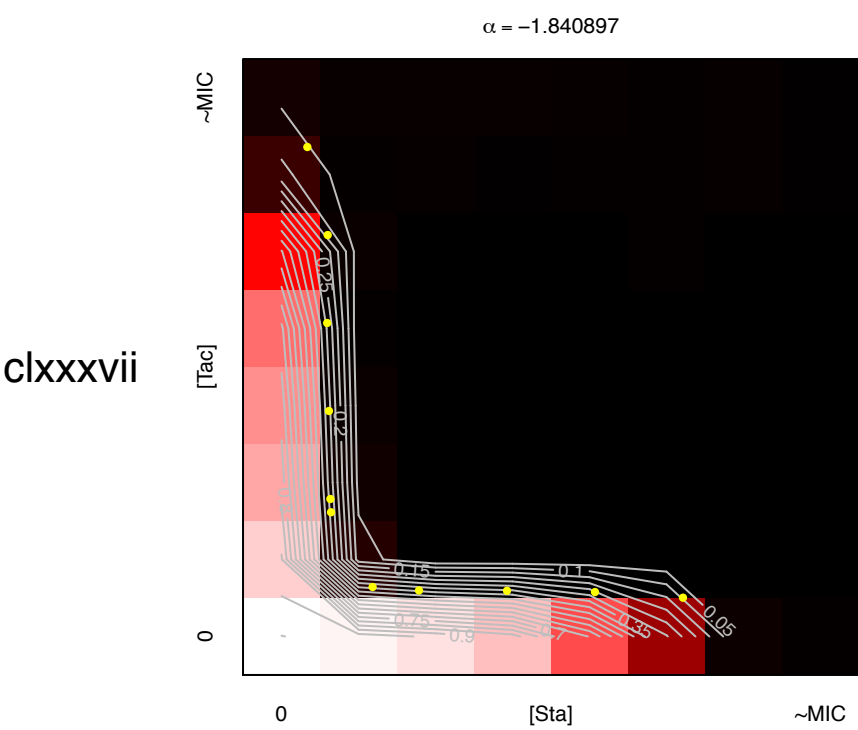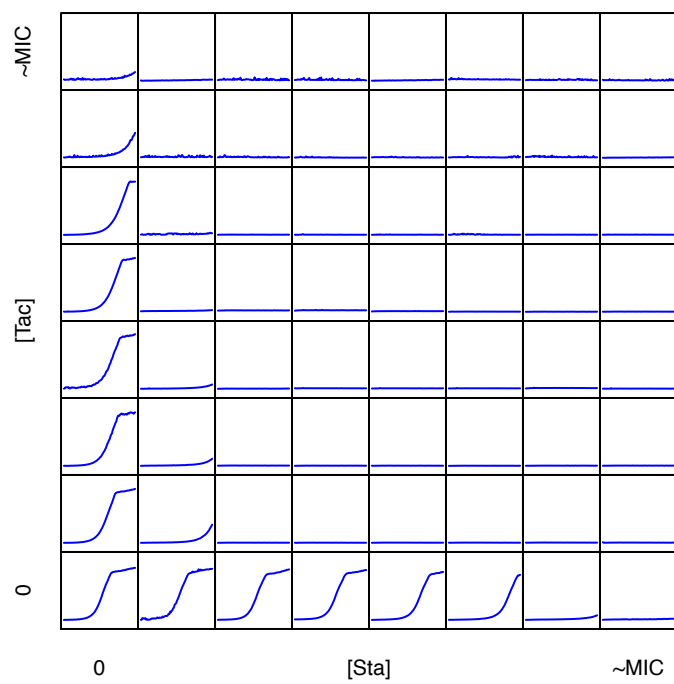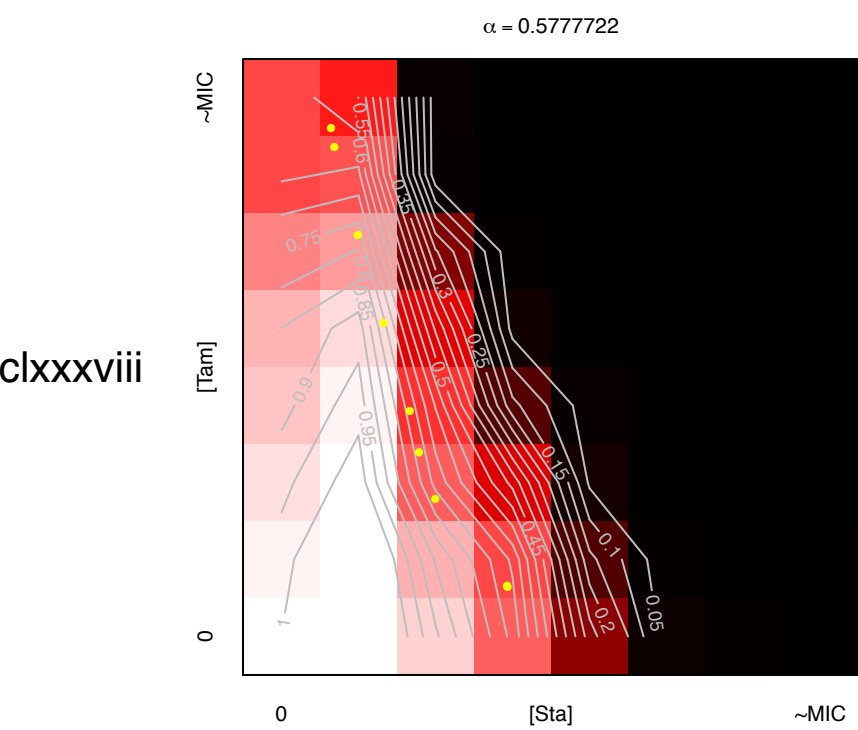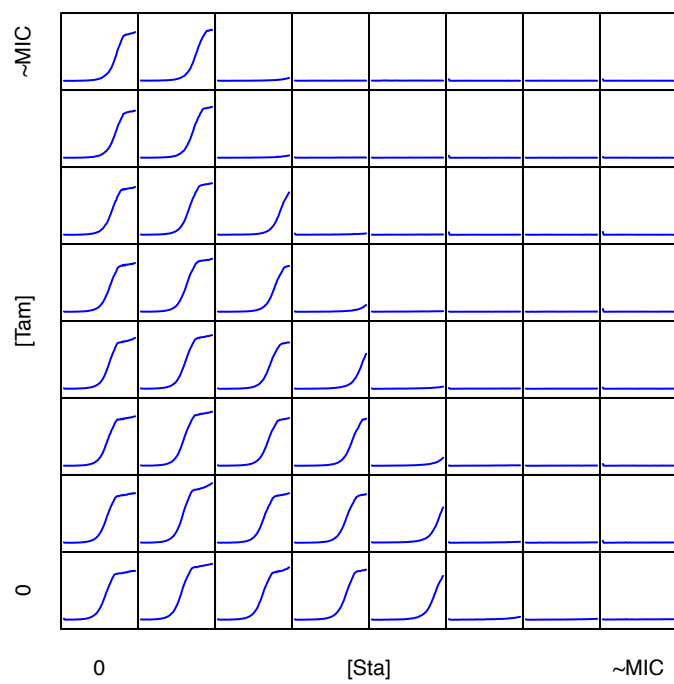

$\alpha = -2.121236$

clxxxix

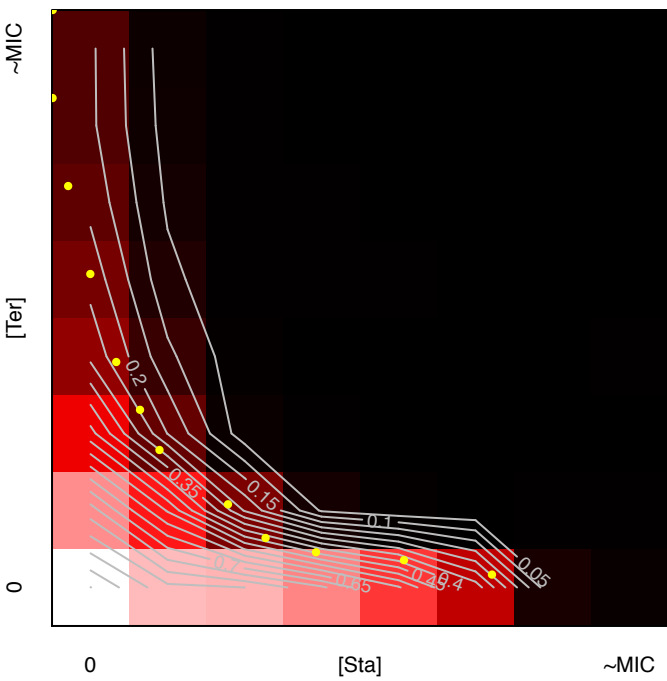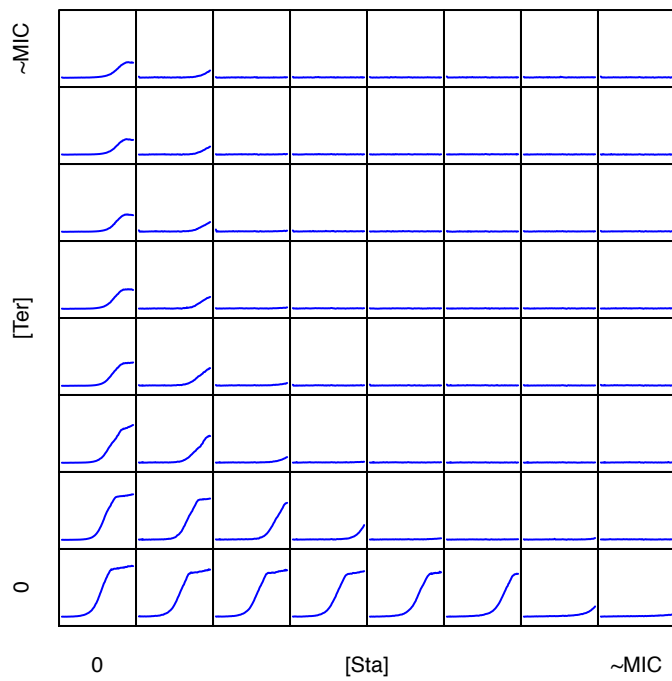

$\alpha = -0.1613496$

CXC

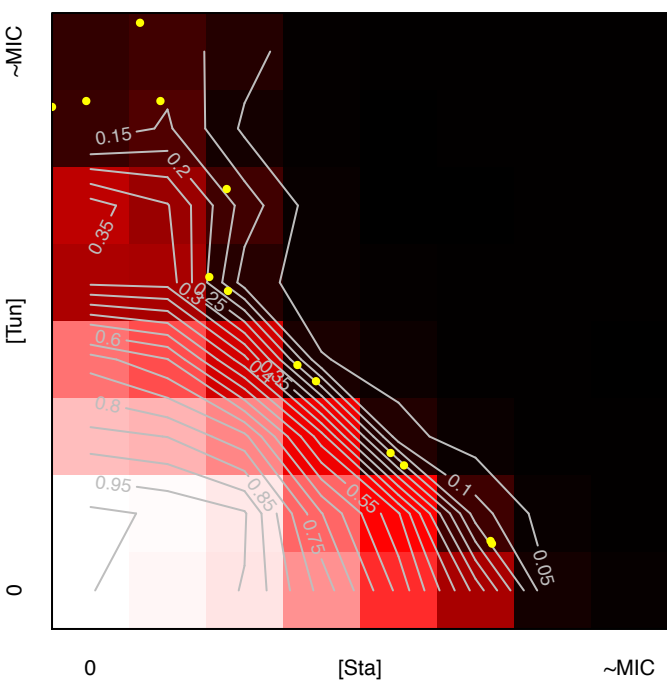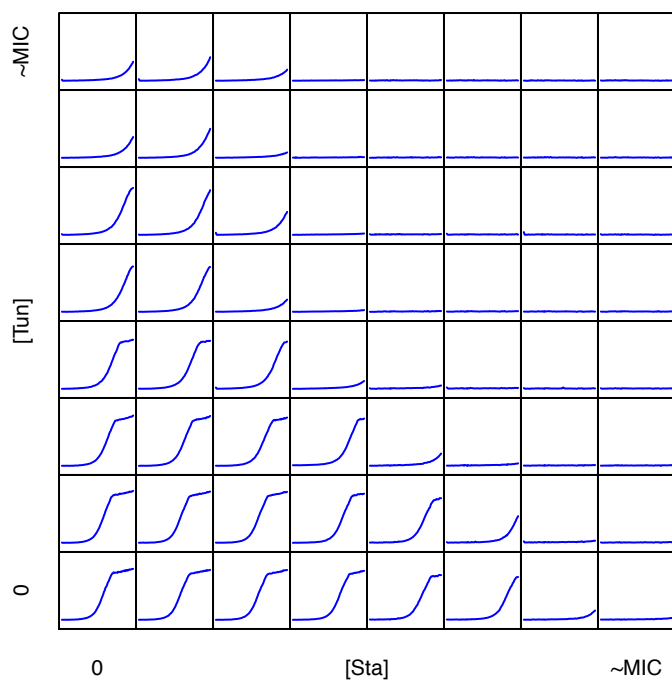

$\alpha = 1.221477$

CXCI

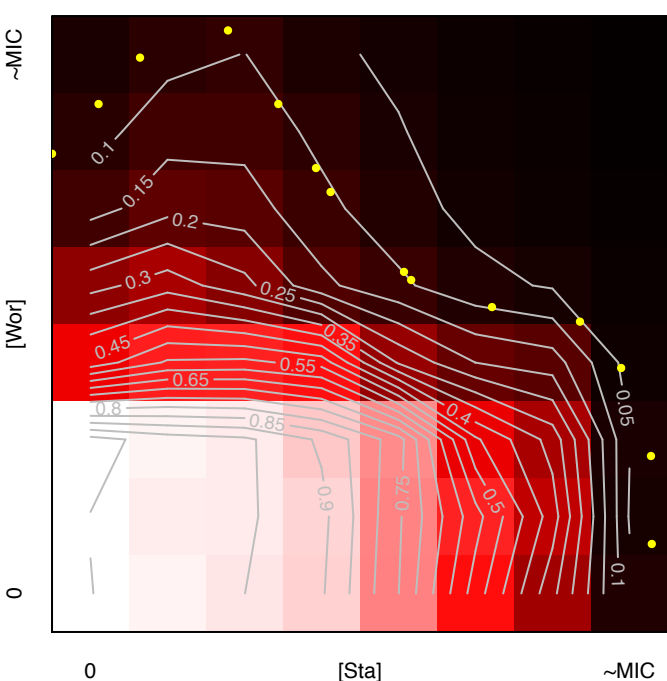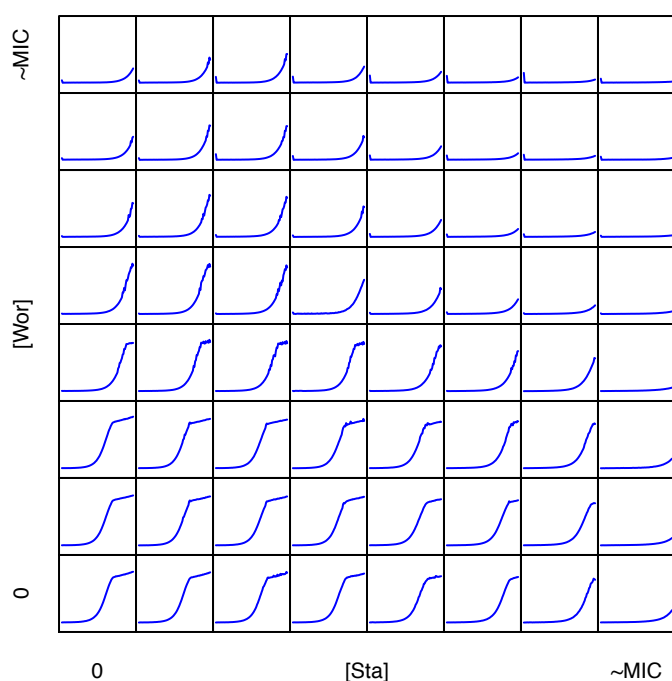

$\alpha = 0.2409603$

CXCII

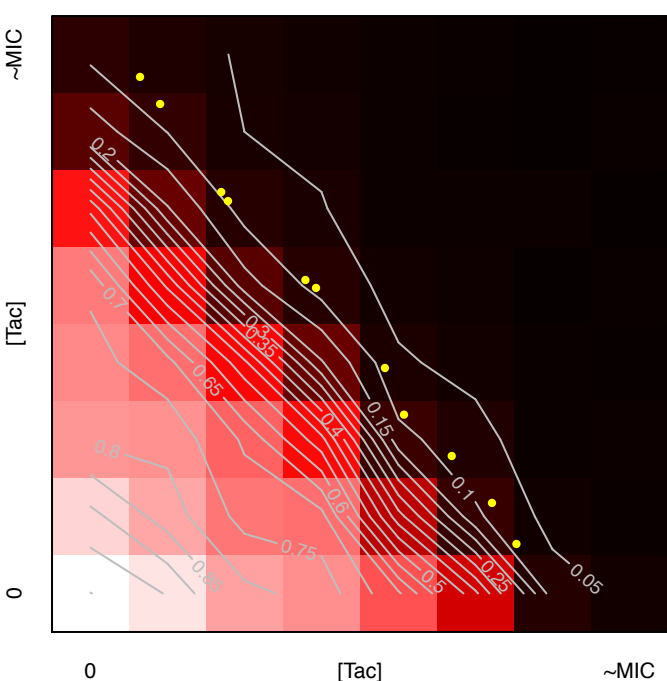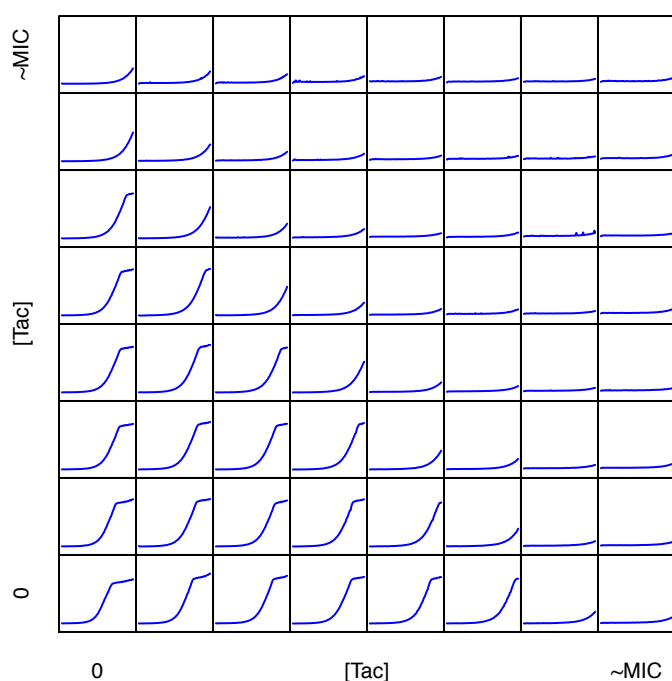



$\alpha = -0.6762134$

CXCiii

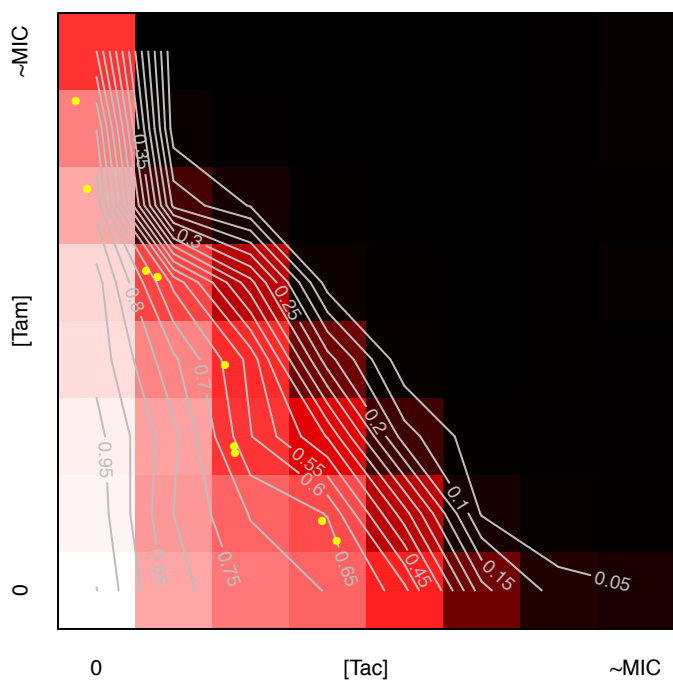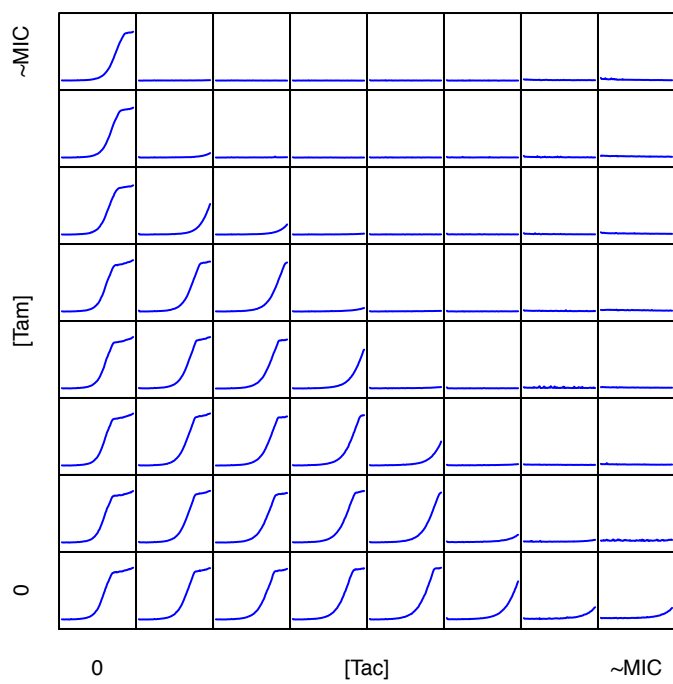

$\alpha = -1.908800$

CXCiv

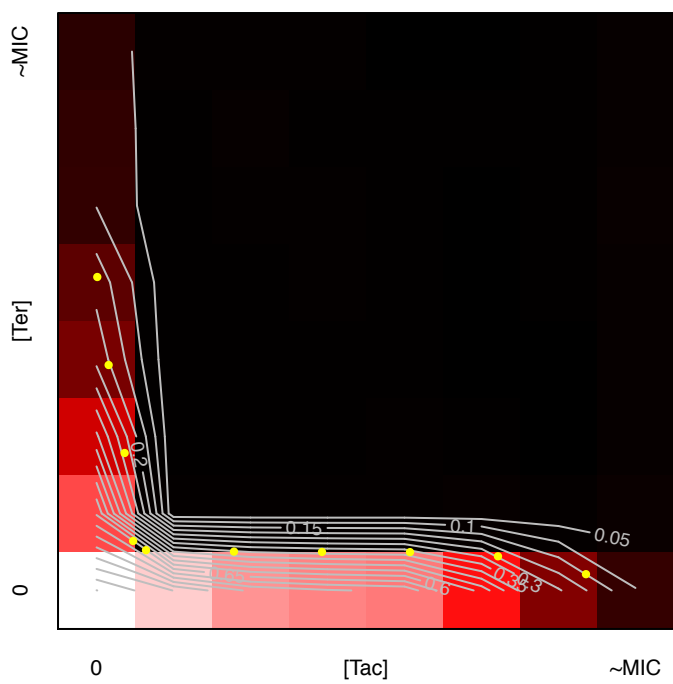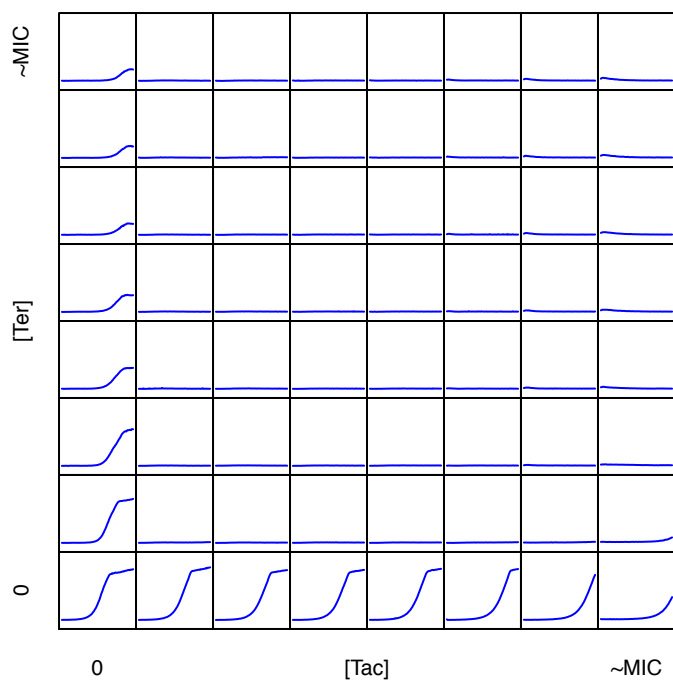

$\alpha = 0.1846954$

CXCV

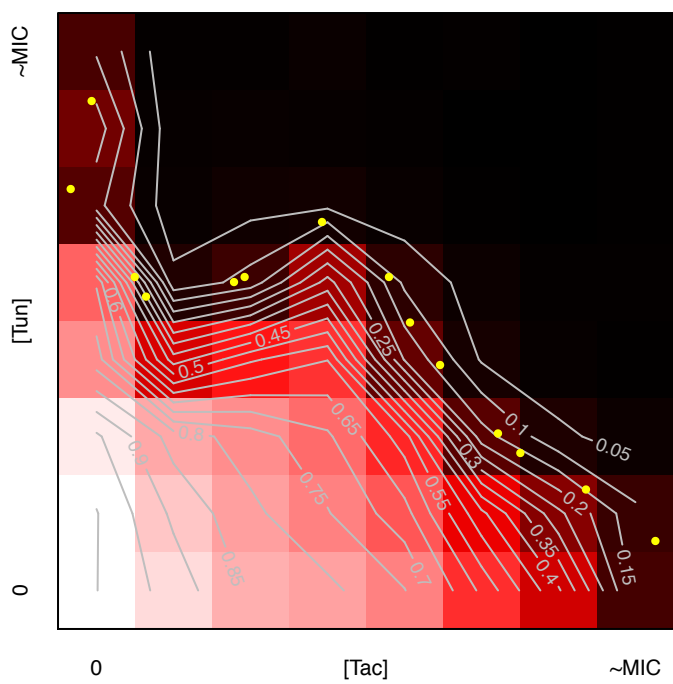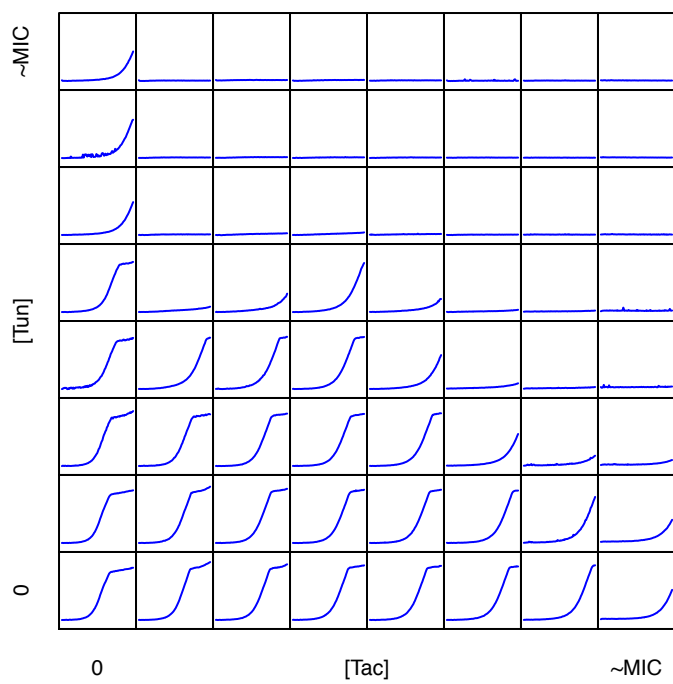

$\alpha = -0.341303$

CXCVi

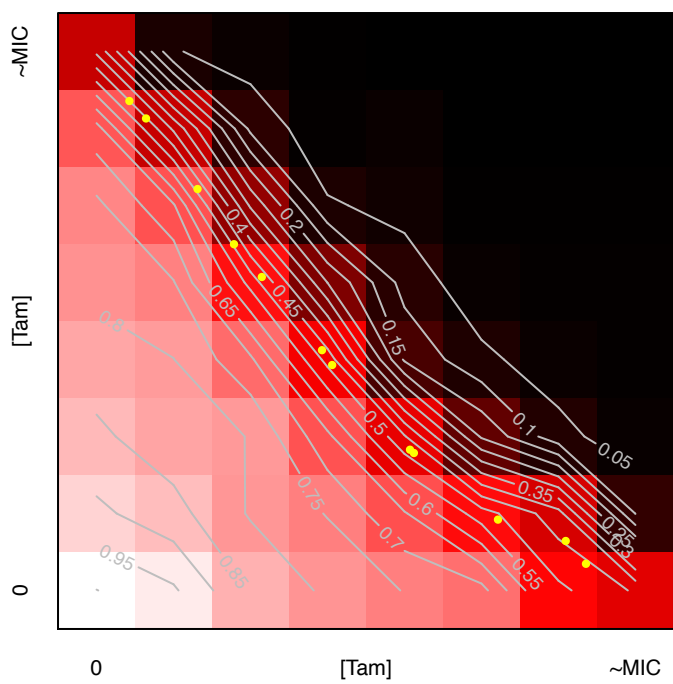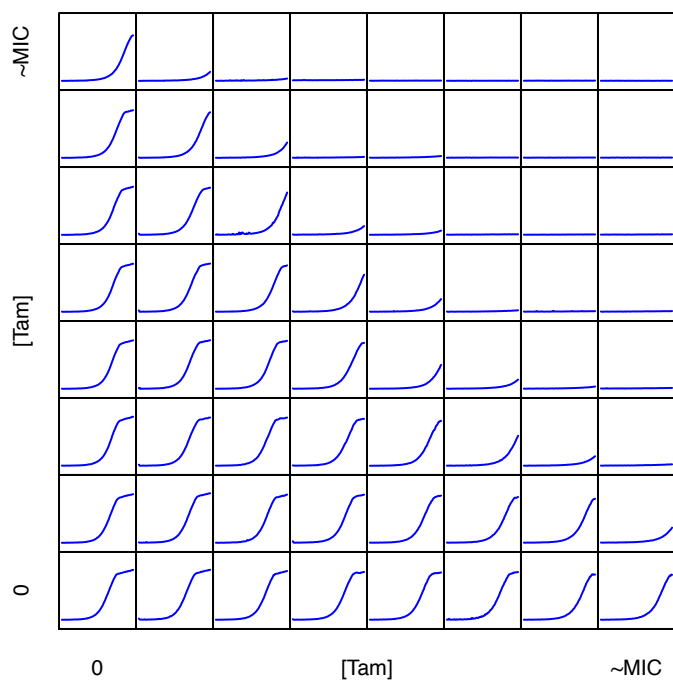

$\alpha = 0.945474$

CXCVii

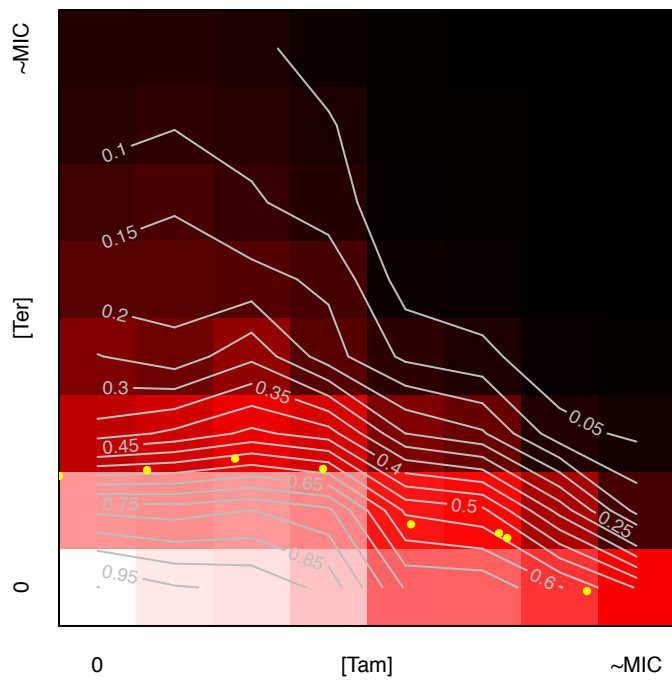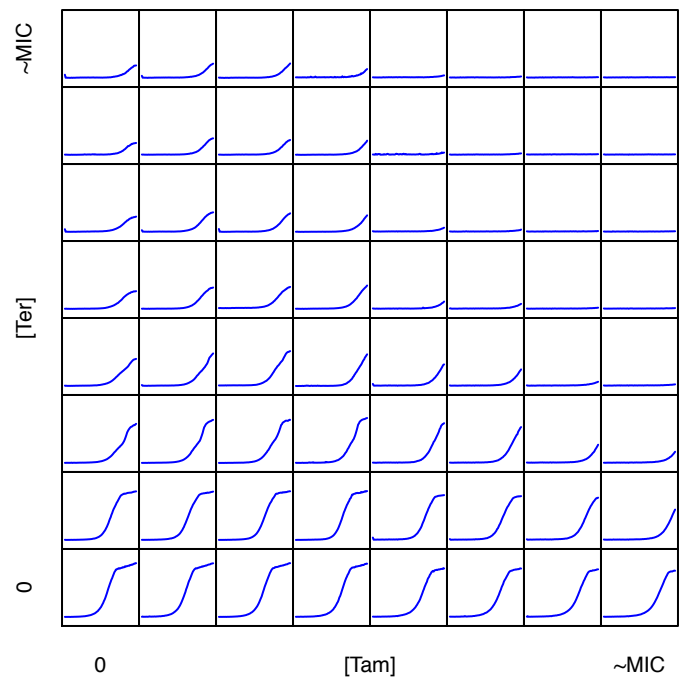

$\alpha = -0.06051851$

CXCViii

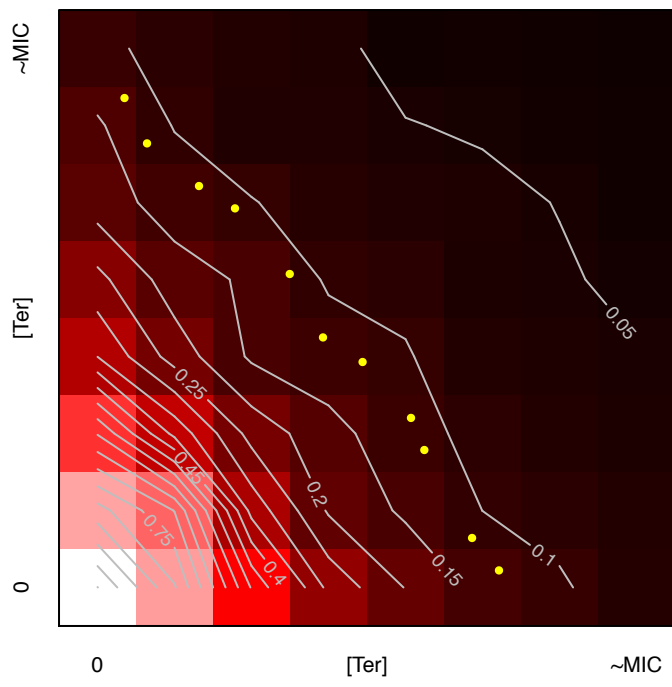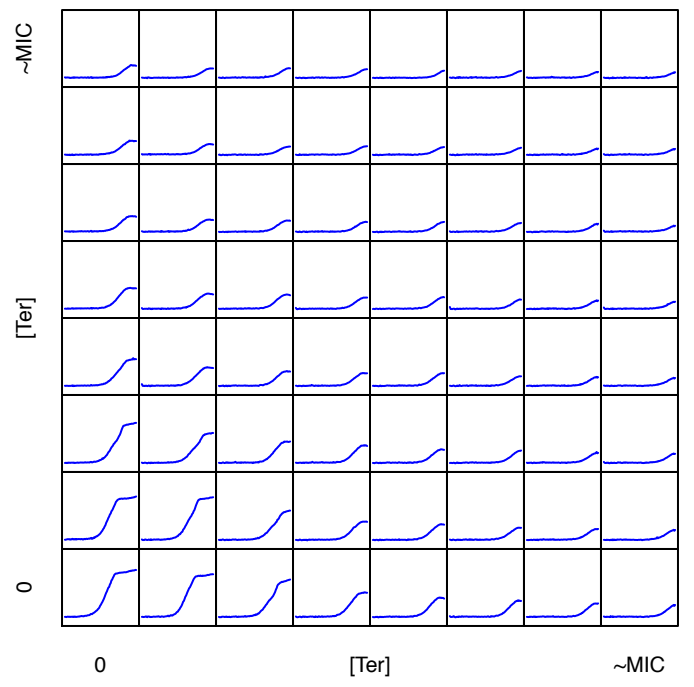

$\alpha = -0.4351235$

CXCix

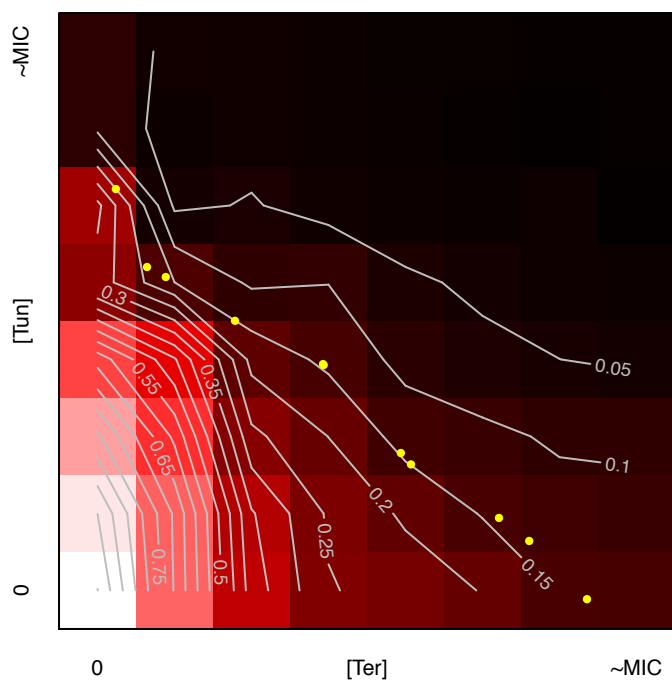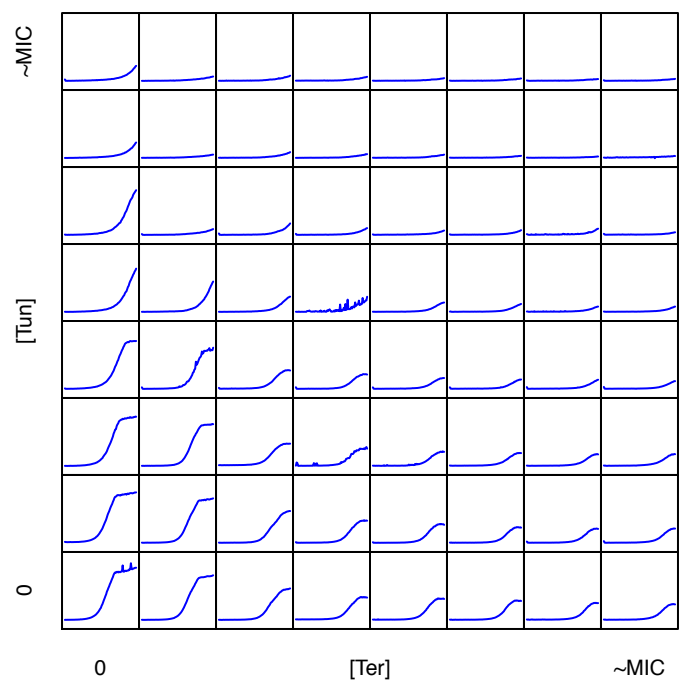

$\alpha = -0.4553879$

CC

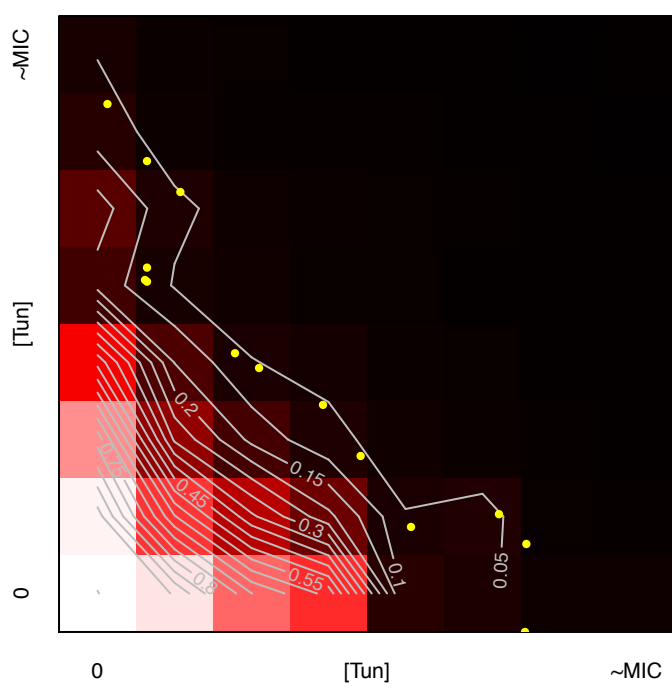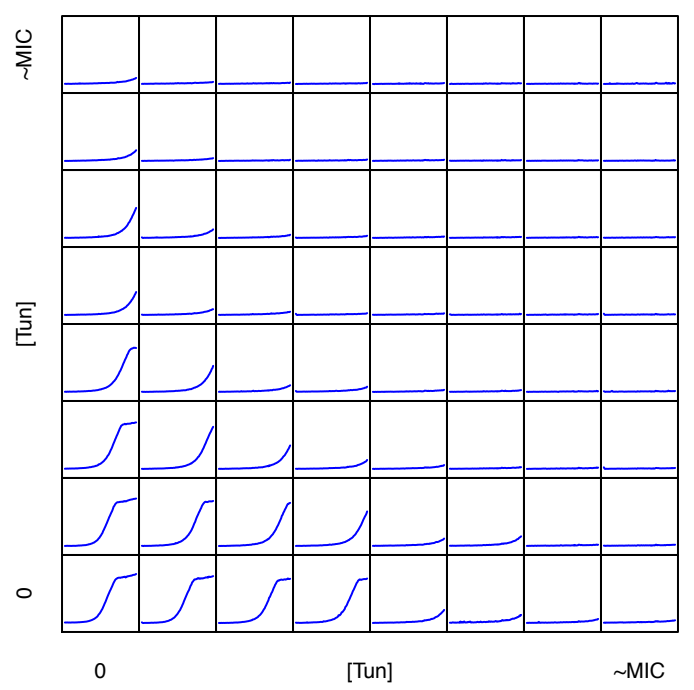

Supplement: msb201171-s2.pdf [file msb201171-s2.pdf]
