# Supplementary material for: Systematic exploration of synergistic drug pairs
Source: PubMed Central journal article supplement — Mol Syst Biol. 2011 Nov 8;7:544. doi: 10.1038/msb.2011.71 (PMC3261710; doi:10.1038/msb.2011.71), 2011-11-08
Supplement: msb201171-s3.pdf [file msb201171-s3.pdf]

## Systematic Exploration of Synergistic Drug Pairs

Murat Cokol, Hon Nian Chua, Murat Tasan, Beste Mutlu, Zohar B. Weinstein, Yo Suzuki, Mehmet E. Nergiz, Michael Costanzo, Anastasia Baryshnikova, Guri Giaever, Corey Nislow, Chad Myers, Brenda Andrews, Charles Boone, Frederick Roth

*Corresponding author: Frederick Roth, University of Toronto*

---

**Review timeline:**

Submission date:

12 July 2011

Accepted:

11 August 2011

---

An earlier version of this manuscript was submitted to *Molecular Systems Biology* and assessed before September 2010. As the original review of the manuscript therefore predates the implementation of *Molecular Systems Biology*'s transparent review process policy, no Peer Review Process File is available with this article.
